# Supplementary material for: An Association Rule Mining Approach to Discover lncRNAs Expression Patterns in Cancer Datasets
Source: Hindawi journal article supplement (doi:10.1155/2015/146250), 2015-01-01
Supplement: f1 [file 146250.f1.zip]

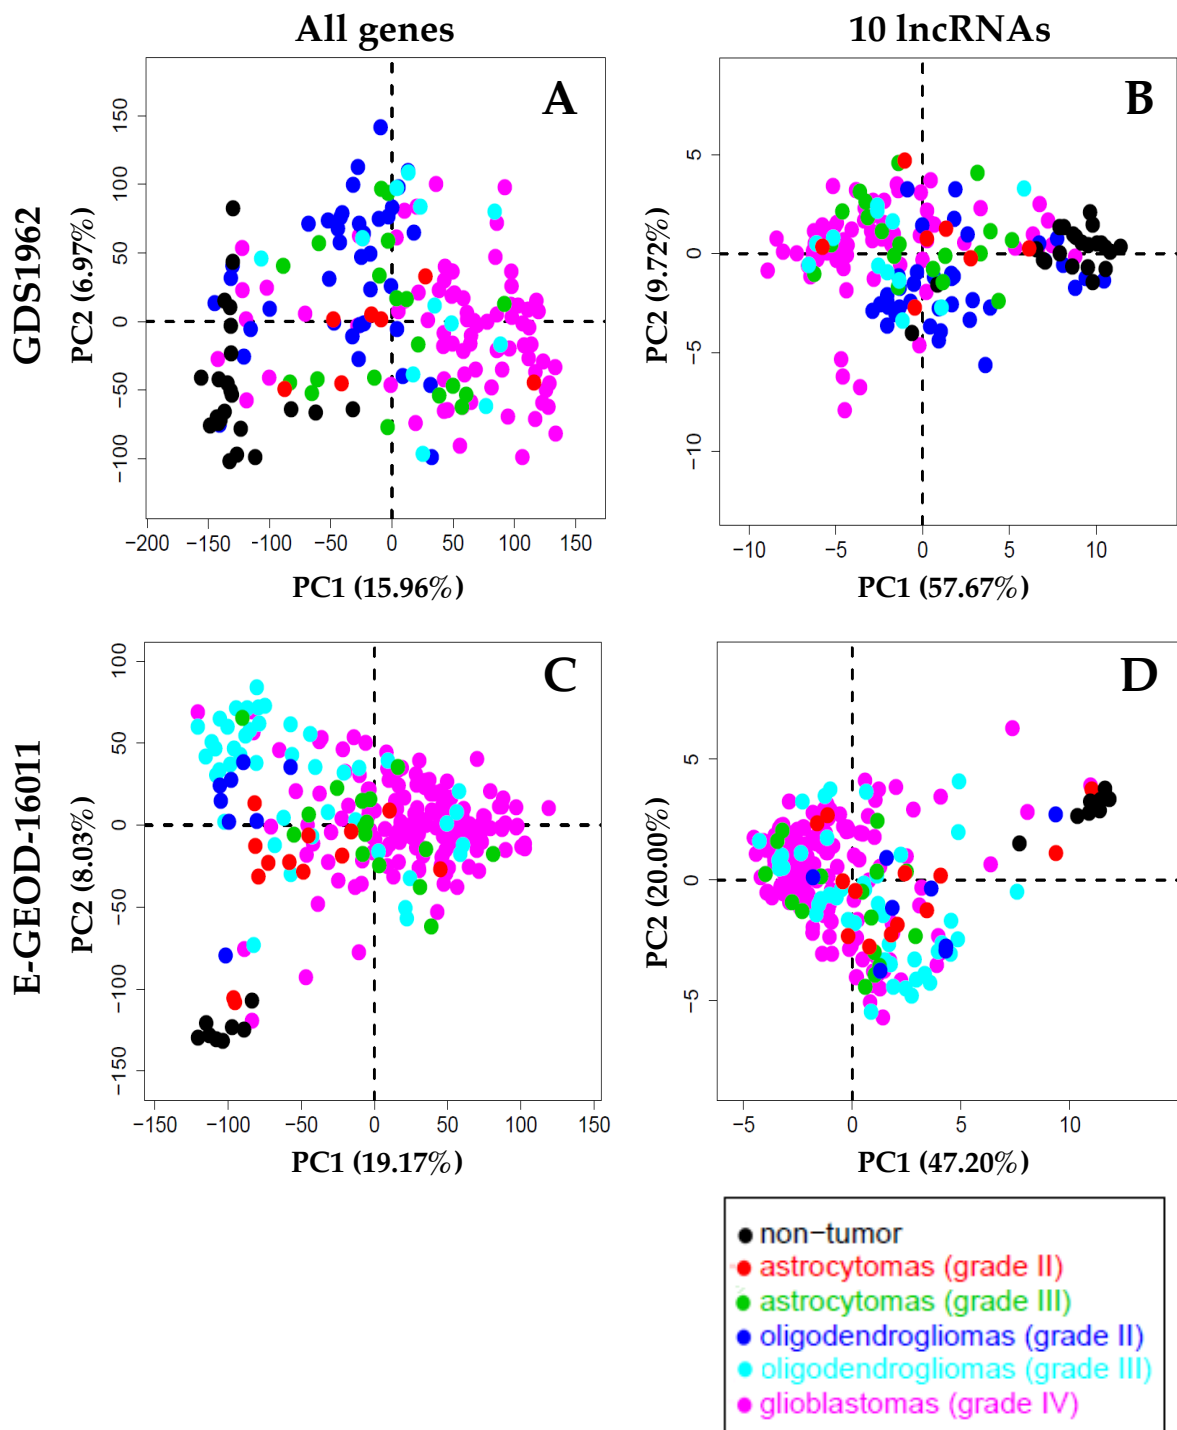

**Figure S2.** Principal Component Analysis (PCA) performed on the GEO dataset GDS1962 (panels A and B) and ArrayExpress dataset E-GEOD-16011 (panels C and D) considering intensity values of all probes (panels A and C) or only probes corresponding to the 10 lncRNAs (panel B and D).
