# Supplementary material for: An Association Rule Mining Approach to Discover lncRNAs Expression Patterns in Cancer Datasets
Source: Hindawi journal article supplement (doi:10.1155/2015/146250), 2015-01-01
Supplement: f1 [file 146250.f1.zip]

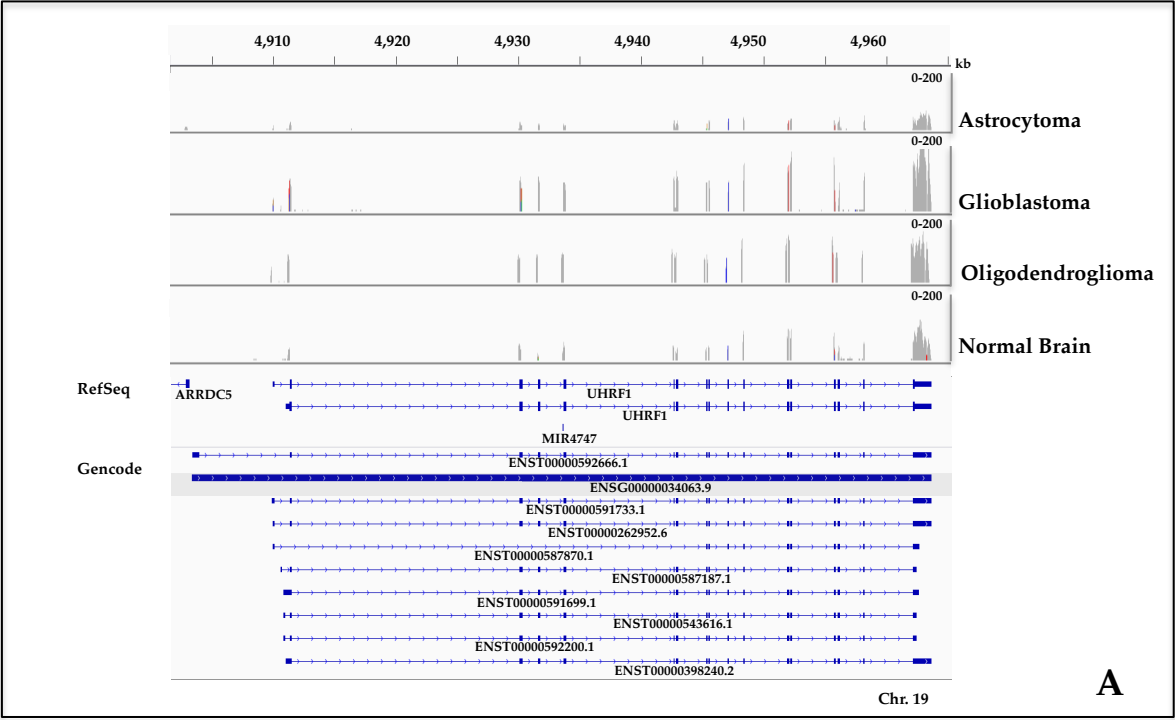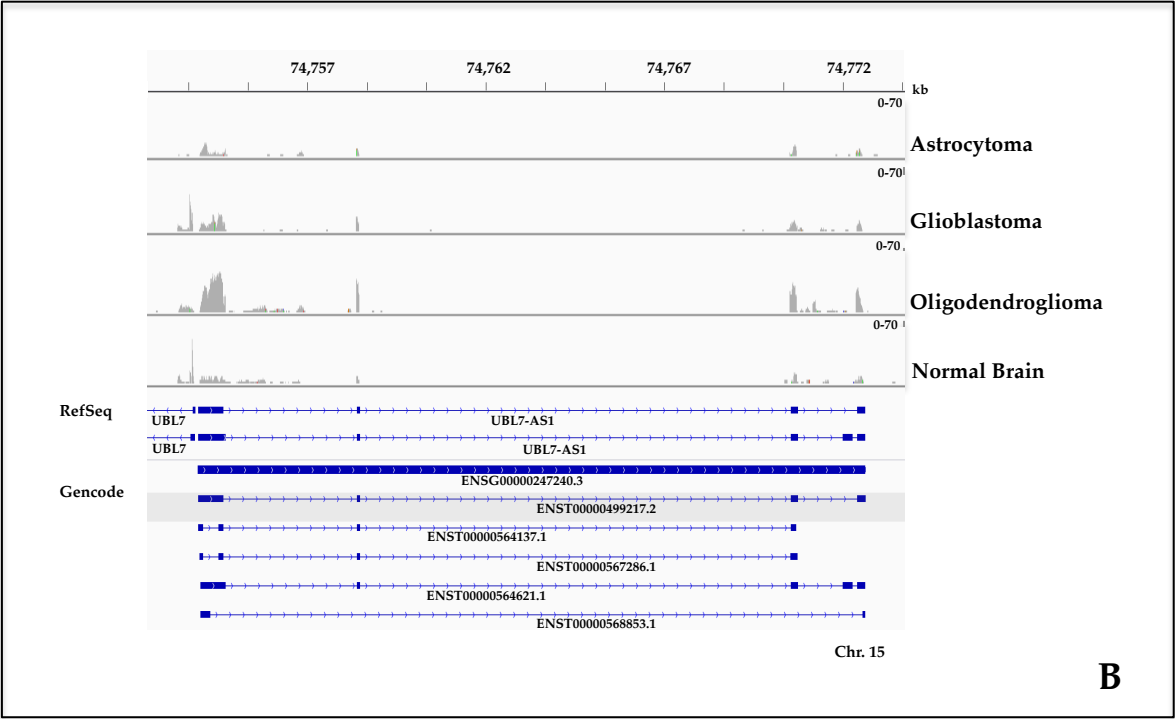

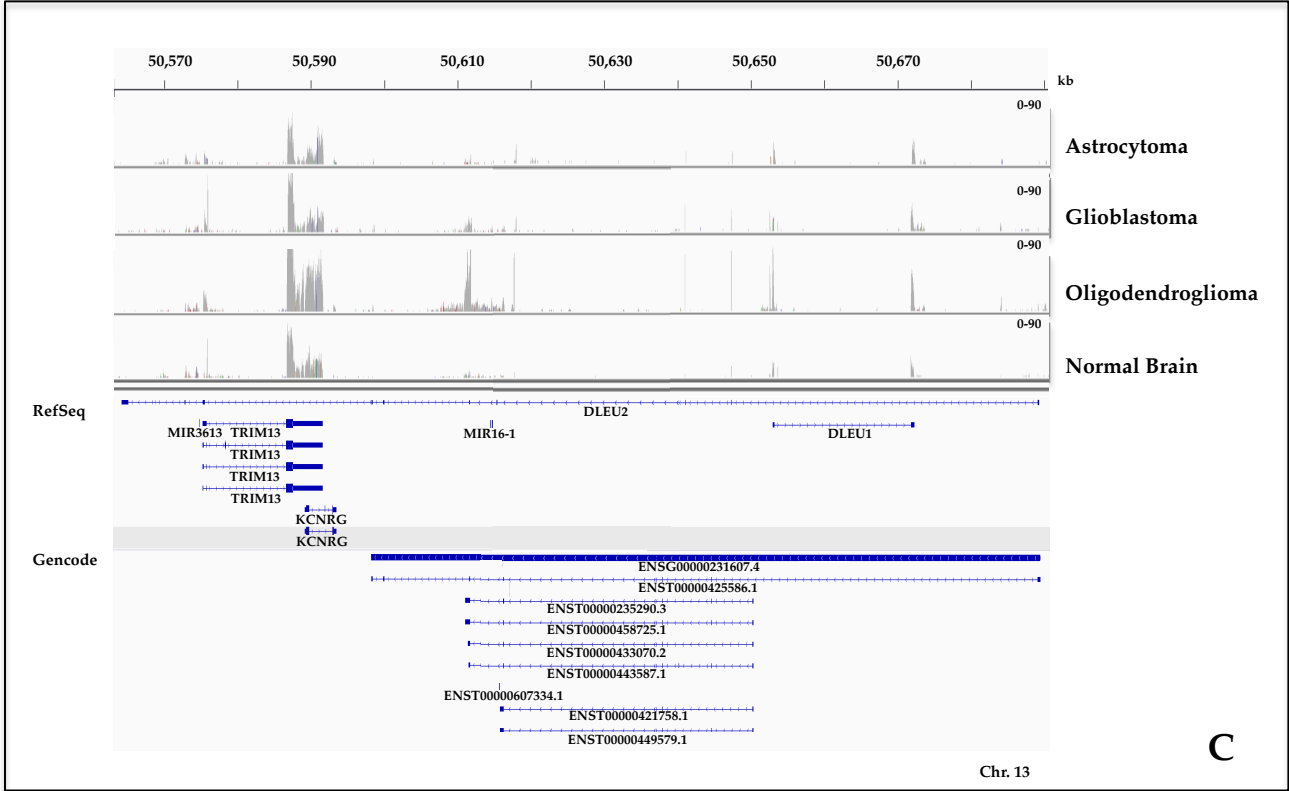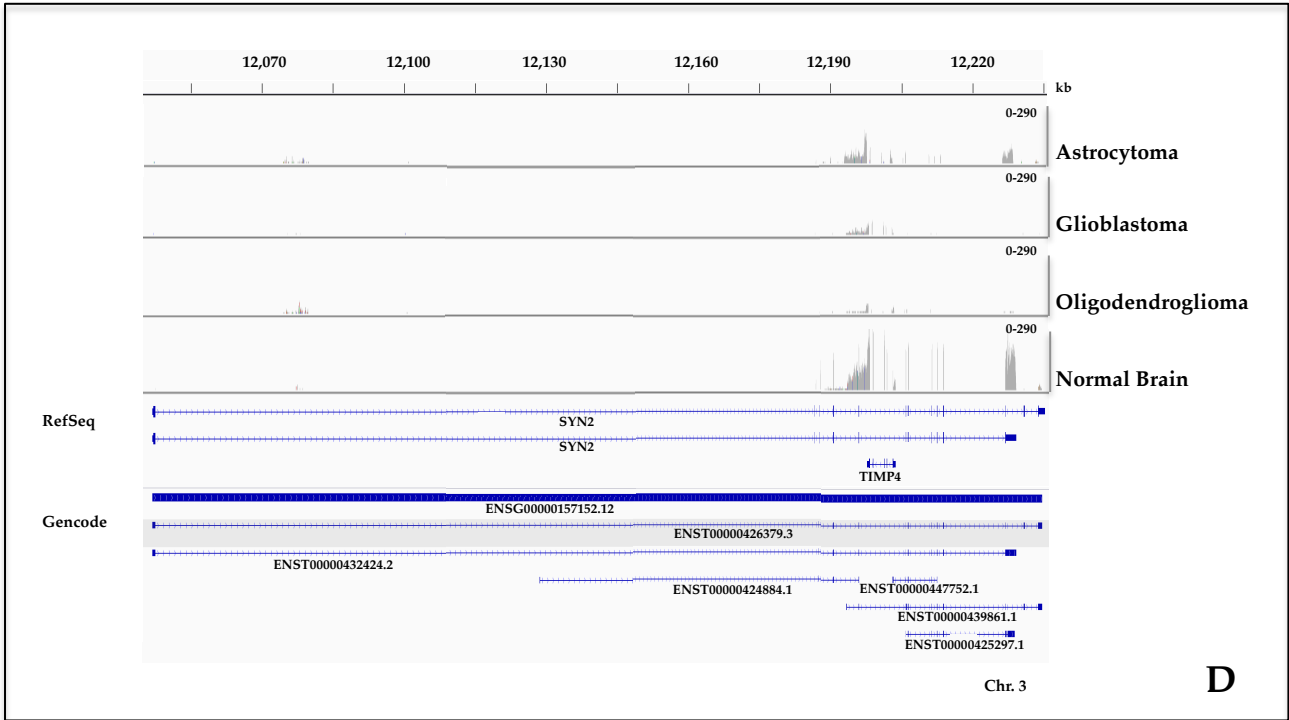

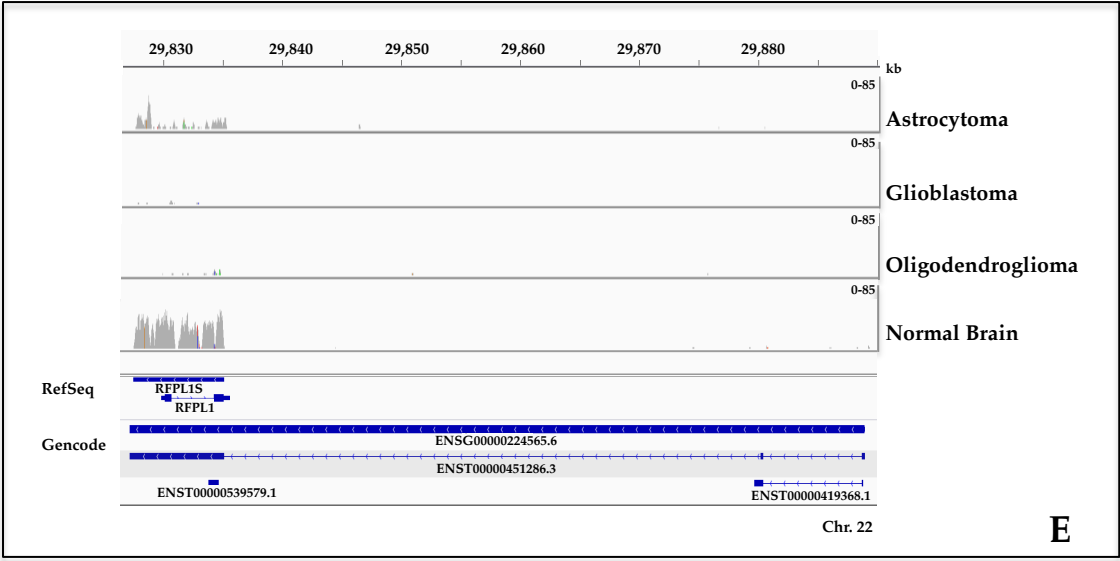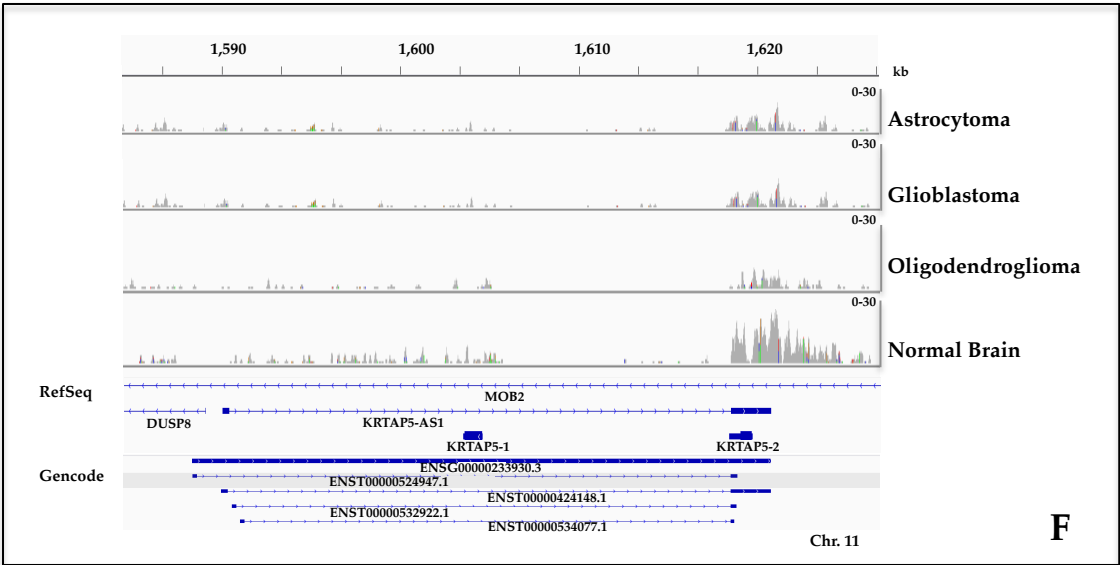

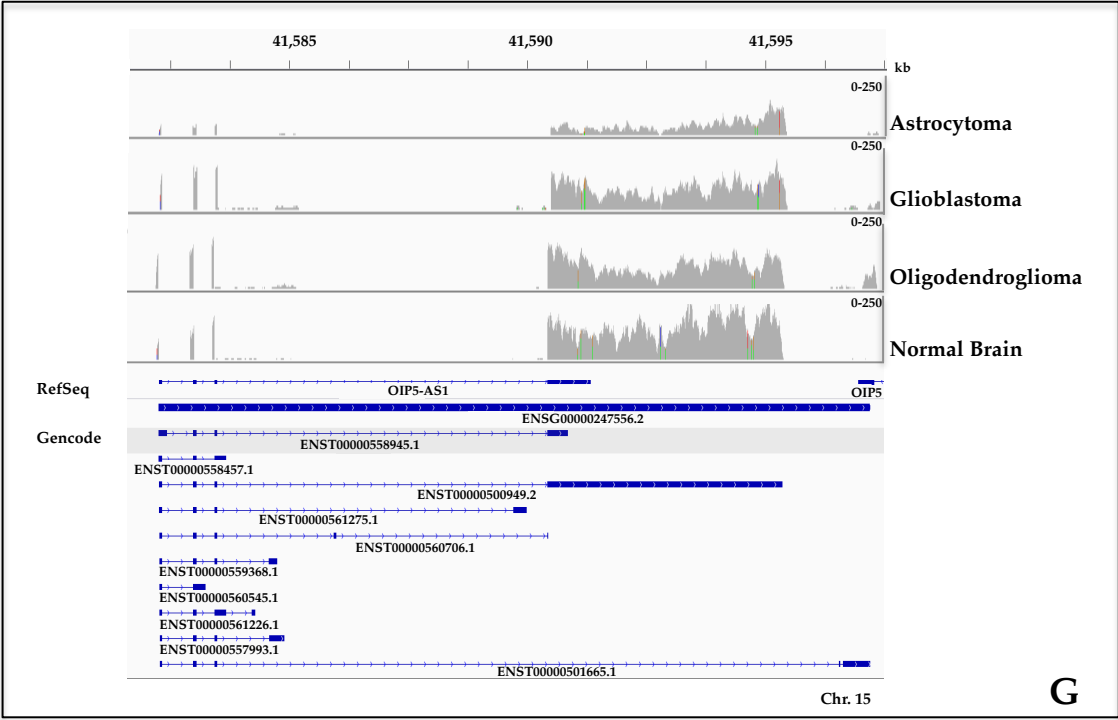

G

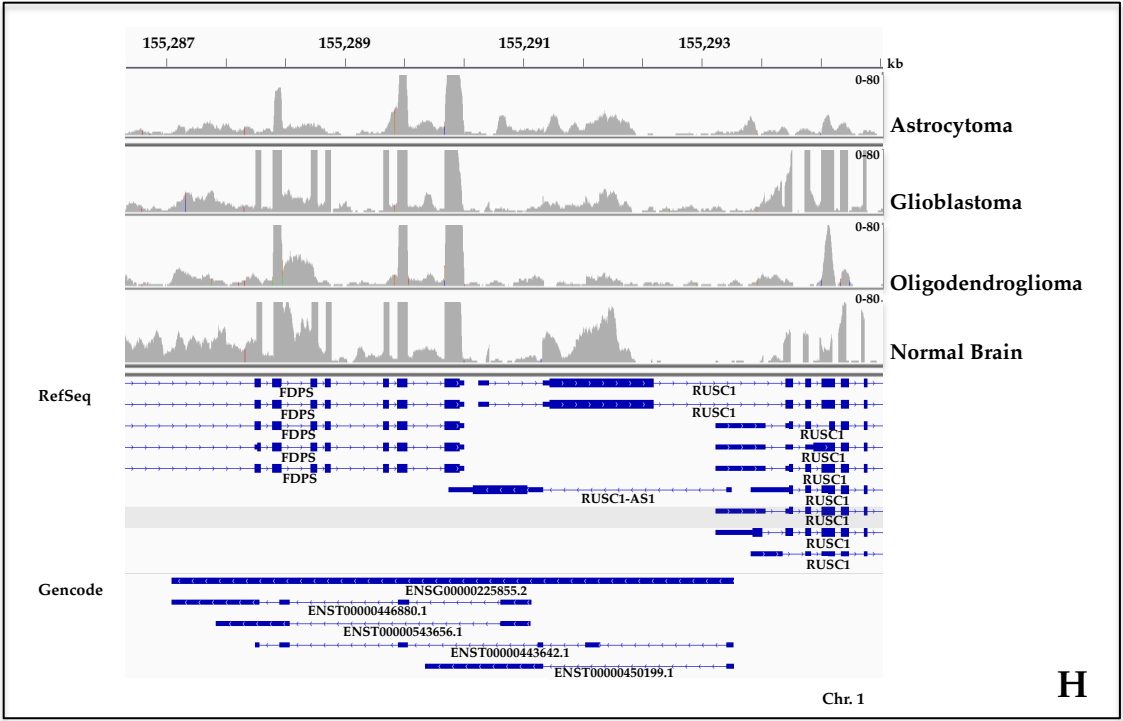

H

**Figure S1.** Genomic alignments of RNA-seq reads corresponding to the eight remaining lncRNAs in the three brain tumors types: (A) UHRF1, (B) UBL7-AS1, (C) DLEU2, (D) SYN2, (E) RFPL1S, (F) KRTAP5-AS1, (G) OIP5-AS1 and (H) RUSC1-AS1. In each panel the transcript annotations from both RefSeq and Gencode were displayed. The visualization of the alignments was obtained with the IGV software that did not operate any normalization of the read counts. For this reason it appears useful to remember the total number of reads aligned for each sample: 36.615.170 for Astrocytoma, 56.810.365 for Glioblastoma, 45.522.007 for Oligodendroglioma and 43.987.358 for Normal Brain.
