# Supplementary material for: An Association Rule Mining Approach to Discover lncRNAs Expression Patterns in Cancer Datasets
Source: Biomed Res Int. 2015 Jul 27;2015:146250. doi: 10.1155/2015/146250 (PMC4530207; doi:10.1155/2015/146250)
Supplement: Supplementary file 1 — Supplementary Material The list of comparisons from GEO datasets is provided in Table S1. The list of the 53 lncRNAs contained in at least one of the 102 nonredundant rules identified by the ARM analysis is provided in Table S2. The list of the 102 nonredundant rules identified through the ARM analysis is provided in Table S3. Number of comodulated genes for each of the 10 lncRNAs is provided in Table S4. Results of the CorrelaGenes analyses of the 10 lncRNAs are provided in Table S5. Results of the enrichment analyses of GO terms for the upregulated genes are provided in Table S6. Results of the enrichment analyses of GO terms for the downregulated genes are provided in Table S7. Figure S1. Genomic alignments of RNA-seq reads corresponding to the eight remaining lncRNAs in the three brain tumors types: (A) UHRF1, (B) UBL7-AS1, (C) DLEU2, (D) SYN2, (E) RFPL1S, (F) KRTAP5-AS1, (G) OIP5-AS1 and (H) RUSC1- AS1. In each panel the transcript annotations from both RefSeq and Gencode were displayed. Figure S2. Principal Component Analysis (PCA) performed on the GEO dataset GDS1962 (panels A and B) and ArrayExpress dataset E-GEOD-16011 (panels C and D) considering intensity values of all probes (panels A and C) or only probes corresponding to the 10 lncRNAs (panel B and D). Figure S3. Direct acyclic graph of the brain-specific Gene Ontology terms obtained by the analysis of downregulated genes. [file 146250.f1.zip › 146250.f1/Table_S1.xlsx]

## Sheet: Supplementary Table I
Supplementary Table I - List of the 34 pairwise comparisons selected for the ARM analysis
#	Study ID	GEO ID	GEO Description	Comparison	# of modulated ncRNAs
1	12953	GDS1732	Papillary thyroid cancer	papillary thyroid cancer vs. normal	9
2	20611	GDS1962	Glioma-derived stem cell factor effect on angiogenesis in the brain	astrocytomas tumor grade II vs. non-tumor	57
3	20612	GDS1962	Glioma-derived stem cell factor effect on angiogenesis in the brain	astrocytomas tumor grade III vs. non-tumor	85
4	20613	GDS1962	Glioma-derived stem cell factor effect on angiogenesis in the brain	glioblastomas tumor grade IV vs. non-tumor	106
5	20614	GDS1962	Glioma-derived stem cell factor effect on angiogenesis in the brain	oligodendrogliomas tumor grade II vs. non-tumor	80
6	20615	GDS1962	Glioma-derived stem cell factor effect on angiogenesis in the brain	oligodendrogliomas tumor grade III vs. non-tumor	125
7	20914	GDS1989	Melanoma progression	vertical growth phase melanoma vs. normal biopsy	3
8	20915	GDS1989	Melanoma progression	lymph node metastasis vs. normal biopsy	5
9	25007	GDS2118	Myelodysplastic syndromes: CD34+ cells	refractory anemia with excess blasts vs. normal	2
10	26321	GDS2250	Basal-like breast cancer tumors	non-basal-like cancer vs. normal	3
11	26322	GDS2250	Basal-like breast cancer tumors	BRCA1-associated cancer vs. normal	2
12	26323	GDS2250	Basal-like breast cancer tumors	basal-like cancer vs. normal	5
13	42882	GDS2418	Vulvar intraepithelial neoplasia	vulvar intraepithelial neoplasia vs. control	25
14	48740	GDS2609	Early onset colorectal cancer: normal-appearing colonic mucosa	early onset colorectal cancer vs. healthy control	24
15	74704	GDS2860	Aldosterone-producing adeonoma	aldosterone-producing adenoma vs. control	3
16	79673	GDS2947	Colorectal adenoma formation	adenoma vs. normal mucosa	75
17	97360	GDS3071	Keloid fibroblast response to hydrocortisone in vitro	untreated keloid scar vs. normal scar	4
18	154592	GDS3592	Ovarian normal surface epithelia and ovarian cancer epithelial cells	ovarian adenocarcinoma epithelial cells vs. normal ovarian surface epithelia	149
19	194823	GDS3836	Multistep pancreatic carcinogenesis: epithelial cells	intraductal papillary-mucinous adenoma (IPMA) vs. normal	124
20	194824	GDS3836	Multistep pancreatic carcinogenesis: epithelial cells	intraductal papillary-mucinous carcinoma (IPMC) vs. normal	127
21	194825	GDS3836	Multistep pancreatic carcinogenesis: epithelial cells	invasive cancer of intraductal papillary-mucinous neoplasm (IPMN) vs. normal	108
22	252640	GDS3853	Ductal carcinoma in situ: mammary gland	ductal carcinoma in situ (DCIS) vs. healthy breast	33
23	252641	GDS3853	Ductal carcinoma in situ: mammary gland	invasive ductal carcinoma (IDC) vs. healthy breast	51
24	254992	GDS3869	Indolent B-cell lymphoma and very early chronic lymphocytic leukemia: peripheral blood CD4+ Tcells	follicular lymphoma (FL) vs. control	2
25	254993	GDS3869	Indolent B-cell lymphoma and very early chronic lymphocytic leukemia: peripheral blood CD4+ Tcells	chronic lymphocytic leukemia (CLL) vs. control	3
26	264888	GDS3902	Chronic B-lymphocytic leukemia: peripheral blood	chronic B-lymphocytic leukemia vs. healthy control	12
27	317582	GDS4102	Pancreatic Tumor and Normal tissue samples	tumor vs. normal	19
28	324427	GDS4114	Reactive stroma of breast and prostate cancer	prostate invasive tumor vs. normal prostate	1
29	376915	GDS4275	Pituitary gonadotrope tumors	gonadotrope tumor vs. normal pituitary (male)	7
30	376920	GDS4275	Pituitary gonadotrope tumors	gonadotrope tumor vs. normal pituitary (female)	8
31	376922	GDS4275	Pituitary gonadotrope tumors	null cell tumor vs. normal pituitary (female)	8
32	378552	GDS4282	Clear-cell renal cell carcinoma tumors and tumorgrafts deficient for tumor suppressor BAP1 or PBRM1	ccRCC tumor (BAP1 loss/PBRM1 wild type) vs. normal cortex	2
33	378566	GDS4282	Clear-cell renal cell carcinoma tumors and tumorgrafts deficient for tumor suppressor BAP1 or PBRM1	ccRCC tumor (BAP1 wild type/PBRM1 loss) vs. normal cortex	1
34	378579	GDS4282	Clear-cell renal cell carcinoma tumors and tumorgrafts deficient for tumor suppressor BAP1 or PBRM1	ccRCC tumor (BAP1 wild type/PBRM1 wild type) vs. normal cortex	1
