# Supplementary material for: An Association Rule Mining Approach to Discover lncRNAs Expression Patterns in Cancer Datasets
Source: Biomed Res Int. 2015 Jul 27;2015:146250. doi: 10.1155/2015/146250 (PMC4530207; doi:10.1155/2015/146250)
Supplement: Supplementary file 1 — Supplementary Material The list of comparisons from GEO datasets is provided in Table S1. The list of the 53 lncRNAs contained in at least one of the 102 nonredundant rules identified by the ARM analysis is provided in Table S2. The list of the 102 nonredundant rules identified through the ARM analysis is provided in Table S3. Number of comodulated genes for each of the 10 lncRNAs is provided in Table S4. Results of the CorrelaGenes analyses of the 10 lncRNAs are provided in Table S5. Results of the enrichment analyses of GO terms for the upregulated genes are provided in Table S6. Results of the enrichment analyses of GO terms for the downregulated genes are provided in Table S7. Figure S1. Genomic alignments of RNA-seq reads corresponding to the eight remaining lncRNAs in the three brain tumors types: (A) UHRF1, (B) UBL7-AS1, (C) DLEU2, (D) SYN2, (E) RFPL1S, (F) KRTAP5-AS1, (G) OIP5-AS1 and (H) RUSC1- AS1. In each panel the transcript annotations from both RefSeq and Gencode were displayed. Figure S2. Principal Component Analysis (PCA) performed on the GEO dataset GDS1962 (panels A and B) and ArrayExpress dataset E-GEOD-16011 (panels C and D) considering intensity values of all probes (panels A and C) or only probes corresponding to the 10 lncRNAs (panel B and D). Figure S3. Direct acyclic graph of the brain-specific Gene Ontology terms obtained by the analysis of downregulated genes. [file 146250.f1.zip › 146250.f1/Table_S2.xlsx]

## Sheet: Table_S2
Supplementary Table II - List of the 53 lncRNAs contained in at least one of the 102 non-redundant rules identified by the ARM analysis
Gene Symbol	Gene Name	Gene ID	# of modulations	Hyperlink
ADAMTS9-AS2	ADAMTS9 antisense RNA 2	100507098	11	NCBI
CRNDE	colorectal neoplasia differentially expressed (non-protein coding)	643911	15	NCBI
DCTN1-AS1	DCTN1 antisense RNA 1	100189589	6	NCBI
DLEU2	deleted in lymphocytic leukemia 2 (non-protein coding)	8847	9	NCBI
DLGAP1-AS1	DLGAP1 antisense RNA 1	649446	6	NCBI
DLGAP1-AS2	DLGAP1 antisense RNA 2	84777	7	NCBI
DLX6-AS1	DLX6 antisense RNA 1	285987	6	NCBI
EPB41L4A-AS1	EPB41L4A antisense RNA 1	114915	6	NCBI
FGF14-AS2	FGF14 antisense RNA 2	283481	6	NCBI
FTX	FTX transcript, XIST regulator (non-protein coding)	100302692	6	NCBI
H19	H19, imprinted maternally expressed transcript (non-protein coding)	283120	8	NCBI
HCG11	HLA complex group 11 (non-protein coding)	493812	6	NCBI
HOTAIRM1	HOXA transcript antisense RNA, myeloid-specific 1	100506311	10	NCBI
JAG1	jagged 1	182	7	NCBI
KRTAP5-AS1	KRTAP5-1/KRTAP5-2 antisense RNA 1	338651	6	NCBI
LINC00087	long intergenic non-protein coding RNA 87	644596	11	NCBI
LINC00301	long intergenic non-protein coding RNA 301	283197	7	NCBI
LINC00617	TCL1 upstream neural differentiation-associated RNA	100507043	6	NCBI
LINC00622	long intergenic non-protein coding RNA 622	644242	6	NCBI
LINC00662	long intergenic non-protein coding RNA 662	148189	7	NCBI
LINC00937	long intergenic non-protein coding RNA 937	389634	6	NCBI
MAFG-AS1	MAFG antisense RNA 1 (head to head)	92659	6	NCBI
MAGI2-AS3	MAGI2 antisense RNA 3	100505881	9	NCBI
MALAT1	metastasis associated lung adenocarcinoma transcript 1 (non-protein coding)	378938	11	NCBI
MCM3AP-AS1	MCM3AP antisense RNA 1	114044	7	NCBI
MEG3	maternally expressed 3 (non-protein coding)	55384	13	NCBI
MIAT	myocardial infarction associated transcript (non-protein coding)	440823	6	NCBI
MIR143HG	MIR143 host gene (non-protein coding)	728264	9	NCBI
MIR503HG	MIR503 host gene (non-protein coding)	84848	7	NCBI
MIR7-3HG	MIR7-3 host gene (non-protein coding)	284424	7	NCBI
NEAT1	nuclear paraspeckle assembly transcript 1 (non-protein coding)	283131	9	NCBI
NR2F1-AS1	NR2F1 antisense RNA 1	441094	8	NCBI
OIP5-AS1	OIP5 antisense RNA 1	729082	6	NCBI
PART1	prostate androgen-regulated transcript 1 (non-protein coding)	25859	7	NCBI
PDCD4-AS1	PDCD4 antisense RNA 1	282997	6	NCBI
PGM5-AS1	PGM5 antisense RNA 1	572558	7	NCBI
PLK1S1	kizuna centrosomal proteinpr	55857	7	NCBI
PPP1R26-AS1	PPP1R26 antisense RNA 1	100506599	7	NCBI
PVT1	Pvt1 oncogene (non-protein coding)	5820	8	NCBI
RFPL1S	RFPL1 antisense RNA 1	10740	7	NCBI
RNF157-AS1	RNF157 antisense RNA 1	100507218	7	NCBI
RUSC1-AS1	RUSC1 antisense RNA 1	284618	10	NCBI
SATB2-AS1	SATB2 antisense RNA 1	150538	6	NCBI
SLC26A4-AS1	SLC26A4 antisense RNA 1	286002	6	NCBI
SNHG12	small nucleolar RNA host gene 12 (non-protein coding)	85028	6	NCBI
SNHG5	small nucleolar RNA host gene 5 (non-protein coding)	387066	6	NCBI
SYN2	synapsin II	6854	9	NCBI
TMEM191A	transmembrane protein 191A (pseudogene)	84222	6	NCBI
TRHDE-AS1	TRHDE antisense RNA 1	283392	9	NCBI
TUG1	taurine up-regulated 1 (non-protein coding)	55000	8	NCBI
UBL7-AS1	UBL7 antisense RNA 1 (head to head)	440288	8	NCBI
UHRF1	ubiquitin-like with PHD and ring finger domains 1	29128	15	NCBI
ZNRD1-AS1	ZNRD1 antisense RNA 1	80862	6	NCBI
