# Supplementary material for: An Association Rule Mining Approach to Discover lncRNAs Expression Patterns in Cancer Datasets
Source: Biomed Res Int. 2015 Jul 27;2015:146250. doi: 10.1155/2015/146250 (PMC4530207; doi:10.1155/2015/146250)
Supplement: Supplementary file 1 — Supplementary Material The list of comparisons from GEO datasets is provided in Table S1. The list of the 53 lncRNAs contained in at least one of the 102 nonredundant rules identified by the ARM analysis is provided in Table S2. The list of the 102 nonredundant rules identified through the ARM analysis is provided in Table S3. Number of comodulated genes for each of the 10 lncRNAs is provided in Table S4. Results of the CorrelaGenes analyses of the 10 lncRNAs are provided in Table S5. Results of the enrichment analyses of GO terms for the upregulated genes are provided in Table S6. Results of the enrichment analyses of GO terms for the downregulated genes are provided in Table S7. Figure S1. Genomic alignments of RNA-seq reads corresponding to the eight remaining lncRNAs in the three brain tumors types: (A) UHRF1, (B) UBL7-AS1, (C) DLEU2, (D) SYN2, (E) RFPL1S, (F) KRTAP5-AS1, (G) OIP5-AS1 and (H) RUSC1- AS1. In each panel the transcript annotations from both RefSeq and Gencode were displayed. Figure S2. Principal Component Analysis (PCA) performed on the GEO dataset GDS1962 (panels A and B) and ArrayExpress dataset E-GEOD-16011 (panels C and D) considering intensity values of all probes (panels A and C) or only probes corresponding to the 10 lncRNAs (panel B and D). Figure S3. Direct acyclic graph of the brain-specific Gene Ontology terms obtained by the analysis of downregulated genes. [file 146250.f1.zip › 146250.f1/Table_S3.xlsx]

## Sheet: Table_S3
Supplementary Table III - List of the 102 non-redundant rules identified through the ARM analysis
Rule	# ncRNAs	ncRNAs symbols	# of supporting comparisons	Supporting comparisons ID
1	13	CRNDE,DLEU2,KRTAP5-AS1,LINC00301,MEG3,OIP5-AS1,PART1,PPP1R26-AS1,RFPL1S,RUSC1-AS1,SYN2,UBL7-AS1,UHRF1	6	154592,20611,20612,20613,20614,20615
2	10	CRNDE,LINC00087,LINC00617,MALAT1,MEG3,MIR7-3HG,PPP1R26-AS1,RUSC1-AS1,UBL7-AS1,UHRF1	6	194824,20611,20612,20613,20614,20615
3	8	CRNDE,LINC00087,LINC00937,MALAT1,MEG3,RUSC1-AS1,TUG1,UBL7-AS1	6	194823,194824,20612,20613,20614,20615
4	8	CRNDE,LINC00301,MEG3,RNF157-AS1,RUSC1-AS1,TUG1,UBL7-AS1,ZNRD1-AS1	6	154592,194823,20612,20613,20614,20615
5	7	CRNDE,DLEU2,LINC00087,MEG3,RUSC1-AS1,TMEM191A,UHRF1	6	194825,20611,20612,20613,20614,20615
6	7	CRNDE,HOTAIRM1,LINC00087,MALAT1,MEG3,RUSC1-AS1,UBL7-AS1	6	194823,194824,20611,20612,20613,20615
7	7	CRNDE,LINC00087,LINC00301,MALAT1,MEG3,RUSC1-AS1,UBL7-AS1	6	194823,20611,20612,20613,20614,20615
8	7	CRNDE,MEG3,PPP1R26-AS1,RUSC1-AS1,TUG1,UBL7-AS1,UHRF1	6	154592,194824,20612,20613,20614,20615
9	6	CRNDE,LINC00087,MALAT1,MEG3,RUSC1-AS1,UBL7-AS1	7	194823,194824,20611,20612,20613,20614,20615
10	6	CRNDE,MEG3,PPP1R26-AS1,RUSC1-AS1,UBL7-AS1,UHRF1	7	154592,194824,20611,20612,20613,20614,20615
11	6	CRNDE,DLEU2,MCM3AP-AS1,MEG3,RUSC1-AS1,UHRF1	6	154592,194825,20611,20612,20614,20615
12	6	CRNDE,DLEU2,MEG3,RUSC1-AS1,TUG1,UHRF1	6	154592,194825,20612,20613,20614,20615
13	6	CRNDE,FTX,MEG3,RUSC1-AS1,TUG1,UBL7-AS1	6	154592,194823,194824,20613,20614,20615
14	6	CRNDE,HCG11,MIAT,SYN2,TRHDE-AS1,UHRF1	6	20612,20613,20614,20615,252640,252641
15	6	CRNDE,LINC00087,LINC00662,PART1,SATB2-AS1,UHRF1	6	20611,20612,20613,20614,20615,79673
16	6	CRNDE,LINC00087,MEG3,NEAT1,RUSC1-AS1,TUG1	6	194823,194824,194825,20612,20613,20615
17	6	CRNDE,LINC00087,MEG3,RUSC1-AS1,TUG1,UHRF1	6	194824,194825,20612,20613,20614,20615
18	6	CRNDE,LINC00301,MCM3AP-AS1,MEG3,RUSC1-AS1,UBL7-AS1	6	154592,194823,20611,20612,20614,20615
19	6	CRNDE,MEG3,NEAT1,RUSC1-AS1,TUG1,UBL7-AS1	6	154592,194823,194824,20612,20613,20615
20	6	CRNDE,MEG3,NEAT1,RUSC1-AS1,TUG1,UHRF1	6	154592,194824,194825,20612,20613,20615
21	5	CRNDE,DLEU2,MEG3,RUSC1-AS1,UHRF1	7	154592,194825,20611,20612,20613,20614,20615
22	5	CRNDE,LINC00087,MEG3,RUSC1-AS1,TUG1	7	194823,194824,194825,20612,20613,20614,20615
23	5	CRNDE,LINC00087,MEG3,RUSC1-AS1,UHRF1	7	194824,194825,20611,20612,20613,20614,20615
24	5	CRNDE,LINC00301,MEG3,RUSC1-AS1,UBL7-AS1	7	154592,194823,20611,20612,20613,20614,20615
25	5	CRNDE,MEG3,NEAT1,RUSC1-AS1,TUG1	7	154592,194823,194824,194825,20612,20613,20615
26	5	CRNDE,MEG3,RUSC1-AS1,TUG1,UBL7-AS1	7	154592,194823,194824,20612,20613,20614,20615
27	5	CRNDE,MEG3,RUSC1-AS1,TUG1,UHRF1	7	154592,194824,194825,20612,20613,20614,20615
28	5	ADAMTS9-AS2,CRNDE,FGF14-AS2,MAGI2-AS3,UHRF1	6	154592,194824,194825,252640,252641,79673
29	5	CRNDE,DLGAP1-AS2,HOTAIRM1,LINC00087,UHRF1	6	194824,20611,20612,20613,20615,79673
30	5	CRNDE,HOTAIRM1,LINC00087,MEG3,UHRF1	6	194824,20611,20612,20613,20615,252641
31	5	CRNDE,HOTAIRM1,MALAT1,RUSC1-AS1,UHRF1	6	194824,20611,20612,20613,20615,252640
32	5	CRNDE,LINC00087,MAFG-AS1,TRHDE-AS1,UHRF1	6	20612,20613,20614,20615,252641,79673
33	5	CRNDE,LINC00087,MCM3AP-AS1,MEG3,RUSC1-AS1	6	194823,194825,20611,20612,20614,20615
34	5	CRNDE,LINC00087,MEG3,SNHG5,UHRF1	6	194825,20611,20613,20614,20615,252641
35	5	CRNDE,LINC00087,MEG3,SYN2,UHRF1	6	20611,20612,20613,20614,20615,252641
36	5	CRNDE,MALAT1,RUSC1-AS1,SYN2,UHRF1	6	20611,20612,20613,20614,20615,252640
37	5	CRNDE,MCM3AP-AS1,MEG3,RUSC1-AS1,TUG1	6	154592,194823,194825,20612,20614,20615
38	4	CRNDE,LINC00087,MEG3,RUSC1-AS1	8	194823,194824,194825,20611,20612,20613,20614,20615
39	4	CRNDE,LINC00087,MEG3,UHRF1	8	194824,194825,20611,20612,20613,20614,20615,252641
40	4	CRNDE,MEG3,RUSC1-AS1,TUG1	8	154592,194823,194824,194825,20612,20613,20614,20615
41	4	CRNDE,MEG3,RUSC1-AS1,UBL7-AS1	8	154592,194823,194824,20611,20612,20613,20614,20615
42	4	CRNDE,MEG3,RUSC1-AS1,UHRF1	8	154592,194824,194825,20611,20612,20613,20614,20615
43	4	CRNDE,HOTAIRM1,LINC00087,MEG3	7	194823,194824,20611,20612,20613,20615,252641
44	4	CRNDE,HOTAIRM1,LINC00087,UHRF1	7	194824,20611,20612,20613,20615,252641,79673
45	4	CRNDE,HOTAIRM1,MALAT1,RUSC1-AS1	7	194823,194824,20611,20612,20613,20615,252640
46	4	CRNDE,HOTAIRM1,TRHDE-AS1,UHRF1	7	20612,20613,20615,252640,252641,317582,79673
47	4	CRNDE,MALAT1,RUSC1-AS1,UHRF1	7	194824,20611,20612,20613,20614,20615,252640
48	4	CRNDE,MCM3AP-AS1,MEG3,RUSC1-AS1	7	154592,194823,194825,20611,20612,20614,20615
49	4	CRNDE,MEG3,SYN2,UHRF1	7	154592,20611,20612,20613,20614,20615,252641
50	4	CRNDE,RUSC1-AS1,SYN2,UHRF1	7	154592,20611,20612,20613,20614,20615,252640
51	4	CRNDE,DLEU2,MIR7-3HG,UHRF1	6	20611,20612,20613,20614,20615,317582
52	4	CRNDE,DLX6-AS1,PART1,UHRF1	6	154592,20611,20612,20613,20614,79673
53	4	CRNDE,HOTAIRM1,MIR7-3HG,UHRF1	6	194824,20611,20612,20613,20615,317582
54	4	CRNDE,HOTAIRM1,PVT1,UHRF1	6	194824,20613,20615,252641,317582,79673
55	4	CRNDE,HOTAIRM1,SYN2,UHRF1	6	20611,20612,20613,20615,252640,252641
56	4	CRNDE,LINC00087,PDCD4-AS1,UHRF1	6	194825,20611,20612,20614,20615,79673
57	4	CRNDE,LINC00087,PVT1,UHRF1	6	194824,194825,20613,20615,252641,79673
58	4	CRNDE,MEG3,PVT1,UHRF1	6	154592,194824,194825,20613,20615,252641
59	4	CRNDE,MIR143HG,SYN2,UHRF1	6	154592,20612,20614,20615,252640,252641
60	4	CRNDE,MIR143HG,TRHDE-AS1,UHRF1	6	20612,20614,20615,252640,252641,79673
61	4	LINC00087,RFPL1S,SYN2,UHRF1	6	20611,20612,20613,20614,20615,42882
62	4	LINC00087,SYN2,TRHDE-AS1,UHRF1	6	20612,20613,20614,20615,252641,42882
63	3	CRNDE,HOTAIRM1,UHRF1	9	194824,20611,20612,20613,20615,252640,252641,317582,79673
64	3	CRNDE,LINC00087,MEG3	9	194823,194824,194825,20611,20612,20613,20614,20615,252641
65	3	CRNDE,MEG3,RUSC1-AS1	9	154592,194823,194824,194825,20611,20612,20613,20614,20615
66	3	CRNDE,MEG3,UHRF1	9	154592,194824,194825,20611,20612,20613,20614,20615,252641
67	3	CRNDE,RUSC1-AS1,UHRF1	9	154592,194824,194825,20611,20612,20613,20614,20615,252640
68	3	CRNDE,DLEU2,UHRF1	8	154592,194825,20611,20612,20613,20614,20615,317582
69	3	CRNDE,HOTAIRM1,LINC00087	8	194823,194824,20611,20612,20613,20615,252641,79673
70	3	CRNDE,MALAT1,RUSC1-AS1	8	194823,194824,20611,20612,20613,20614,20615,252640
71	3	CRNDE,PVT1,UHRF1	8	154592,194824,194825,20613,20615,252641,317582,79673
72	3	CRNDE,SYN2,UHRF1	8	154592,20611,20612,20613,20614,20615,252640,252641
73	3	CRNDE,TRHDE-AS1,UHRF1	8	20612,20613,20614,20615,252640,252641,317582,79673
74	3	ADAMTS9-AS2,MAGI2-AS3,UHRF1	7	154592,194824,194825,252640,252641,42882,79673
75	3	CRNDE,MIR143HG,UHRF1	7	154592,20612,20614,20615,252640,252641,79673
76	3	CRNDE,MIR7-3HG,UHRF1	7	194824,20611,20612,20613,20614,20615,317582
77	3	CRNDE,PART1,UHRF1	7	154592,20611,20612,20613,20614,20615,79673
78	3	LINC00087,SYN2,UHRF1	7	20611,20612,20613,20614,20615,252641,42882
79	3	LINC00087,TRHDE-AS1,UHRF1	7	20612,20613,20614,20615,252641,42882,79673
80	3	RFPL1S,SYN2,UHRF1	7	154592,20611,20612,20613,20614,20615,42882
81	3	SYN2,TRHDE-AS1,UHRF1	7	20612,20613,20614,20615,252640,252641,42882
82	3	ADAMTS9-AS2,MAGI2-AS3,NR2F1-AS1	6	154592,194824,194825,252641,48740,79673
83	3	ADAMTS9-AS2,MAGI2-AS3,PGM5-AS1	6	154592,194824,252640,252641,48740,79673
84	3	CRNDE,JAG1,MEG3	6	154592,194823,20612,20613,20615,252641
85	3	CRNDE,LINC00622,MEG3	6	20611,20612,20613,20614,20615,376922
86	3	CRNDE,MAGI2-AS3,NR2F1-AS1	6	154592,194823,194824,194825,252641,79673
87	3	CRNDE,MAGI2-AS3,PGM5-AS1	6	154592,194823,194824,252640,252641,79673
88	3	CRNDE,MEG3,PLK1S1	6	154592,194823,194824,194825,20614,252641
89	3	CRNDE,MEG3,SNHG12	6	154592,194823,194824,20611,20613,252641
90	3	H19,MEG3,NEAT1	6	194823,194824,194825,20613,376915,376920
91	3	MAGI2-AS3,NR2F1-AS1,PGM5-AS1	6	154592,194823,194824,252641,48740,79673
92	3	MEG3,MIR503HG,NEAT1	6	154592,194824,20613,20615,376915,376920
93	2	CRNDE,HOTAIRM1	10	194823,194824,20611,20612,20613,20615,252640,252641,317582,79673
94	2	CRNDE,RUSC1-AS1	10	154592,194823,194824,194825,20611,20612,20613,20614,20615,252640
95	2	MEG3,NEAT1	9	154592,194823,194824,194825,20612,20613,20615,376915,376920
96	2	SYN2,UHRF1	9	154592,20611,20612,20613,20614,20615,252640,252641,42882
97	2	TRHDE-AS1,UHRF1	9	20612,20613,20614,20615,252640,252641,317582,42882,79673
98	2	MAGI2-AS3,PGM5-AS1	7	154592,194823,194824,252640,252641,48740,79673
99	2	MEG3,MIR503HG	7	154592,194824,20613,20614,20615,376915,376920
100	2	DCTN1-AS1,SLC26A4-AS1	6	12953,20611,20612,20613,20614,20615
101	2	DLGAP1-AS1,MALAT1	6	194823,194824,20611,20613,20615,264888
102	2	EPB41L4A-AS1,MAGI2-AS3	6	154592,194823,194824,194825,252641,42882
