# Supplementary material for: An Association Rule Mining Approach to Discover lncRNAs Expression Patterns in Cancer Datasets
Source: Biomed Res Int. 2015 Jul 27;2015:146250. doi: 10.1155/2015/146250 (PMC4530207; doi:10.1155/2015/146250)
Supplement: Supplementary file 1 — Supplementary Material The list of comparisons from GEO datasets is provided in Table S1. The list of the 53 lncRNAs contained in at least one of the 102 nonredundant rules identified by the ARM analysis is provided in Table S2. The list of the 102 nonredundant rules identified through the ARM analysis is provided in Table S3. Number of comodulated genes for each of the 10 lncRNAs is provided in Table S4. Results of the CorrelaGenes analyses of the 10 lncRNAs are provided in Table S5. Results of the enrichment analyses of GO terms for the upregulated genes are provided in Table S6. Results of the enrichment analyses of GO terms for the downregulated genes are provided in Table S7. Figure S1. Genomic alignments of RNA-seq reads corresponding to the eight remaining lncRNAs in the three brain tumors types: (A) UHRF1, (B) UBL7-AS1, (C) DLEU2, (D) SYN2, (E) RFPL1S, (F) KRTAP5-AS1, (G) OIP5-AS1 and (H) RUSC1- AS1. In each panel the transcript annotations from both RefSeq and Gencode were displayed. Figure S2. Principal Component Analysis (PCA) performed on the GEO dataset GDS1962 (panels A and B) and ArrayExpress dataset E-GEOD-16011 (panels C and D) considering intensity values of all probes (panels A and C) or only probes corresponding to the 10 lncRNAs (panel B and D). Figure S3. Direct acyclic graph of the brain-specific Gene Ontology terms obtained by the analysis of downregulated genes. [file 146250.f1.zip › 146250.f1/Table_S5.xls]

## Sheet: CRNDE
Target Gene	CRNDE
Target Sign	1
Target Gene LFC >=	1
Gene LFC >=	1
LFC p value <=	0.05
Genes filtered by co-pres >=	10	%
Genes filtered by lift >=	0
Genes filtered by Chi Square p value <=	1
Genes filtered by correlation >=	0.3
Target present in	1075	comparisons
Target modulated in	38	comparisons
type	id_gene_symbol	description	chromosome_name	band	strand	start_position	end_position	id_ensembl	sign	GTpGXp	GTmGXm	GTnGXn	GTnGXm	GTmGXn	copres	coexpr	lift	chi	correlation
Correlated	MARCH4	membrane-associated ring finger (C3HC4) 4, E3 ubiquitin protein ligase [Source:HGNC Symbol;Acc:29269]	2	q35	-1	217122588	217236750	ENSG00000144583	-	1052	8	1007	10	27	97.86	0.76	13.359	1.01e-22	0.302499
Correlated	MARCH6	membrane-associated ring finger (C3HC4) 6, E3 ubiquitin protein ligase [Source:HGNC Symbol;Acc:30550]	5	p15.2	1	10353815	10440500	ENSG00000145495	-	977	8	937	9	23	90.88	0.82	14.831	2.13e-25	0.333182
Correlated	MARCH11	membrane-associated ring finger (C3HC4) 11 [Source:HGNC Symbol;Acc:33609]	5	p15.1	-1	16067248	16180871	ENSG00000183654	-	959	8	920	1	30	89.21	0.83	22.433	2.46e-39	0.42374
Correlated	SEPT3	septin 3 [Source:HGNC Symbol;Acc:10750]	22	q13.2	1	42372276	42394225	ENSG00000100167	-	1040	6	1001	2	31	96.74	0.58	21.081	6.56e-28	0.33958
Correlated	SEPT4	septin 4 [Source:HGNC Symbol;Acc:9165]	17	q22	-1	56597611	56618179	ENSG00000108387	-	1044	11	1002	5	26	97.12	1.05	19.399	1.4e-45	0.439983
Correlated	SEPT5	septin 5 [Source:HGNC Symbol;Acc:9164]	22	q11.21	1	19701987	19712295	ENSG00000184702	-	123	1	121	0	1	11.44	0.81	61.5	5.72e-15	0.704203
Correlated	SEPT6	septin 6 [Source:HGNC Symbol;Acc:15848]	X	q24	-1	118749687	118827333	ENSG00000125354	-	972	13	919	21	19	90.42	1.34	11.614	3.11e-31	0.372844
Correlated	SEPT7	septin 7 [Source:HGNC Symbol;Acc:1717]	7	p14.2	1	35840542	35944917	ENSG00000122545	-	1065	9	1026	4	26	99.07	0.85	21.066	4.69e-41	0.411186
Correlated	SEPT9	septin 9 [Source:HGNC Symbol;Acc:7323]	HSCHR17_3_CTG4	q25.2	1	75288273	75508300	ENSG00000261843	+	961	7	922	8	24	89.4	0.73	14.467	8.19e-22	0.309599
Correlated	SEPT11	septin 11 [Source:HGNC Symbol;Acc:25589]	4	q21.1	1	77870856	77961537	ENSG00000138758	-	1069	10	1021	10	28	99.44	0.94	14.066	9.94e-30	0.346358
Correlated	AACS	acetoacetyl-CoA synthetase [Source:HGNC Symbol;Acc:21298]	12	q24.31	1	125549925	125627873	ENSG00000081760	-	951	10	917	3	21	88.47	1.05	23.598	0	0.488346
Correlated	AACSP1	acetoacetyl-CoA synthetase pseudogene 1 [Source:HGNC Symbol;Acc:18226]	5	q35.3	-1	178191862	178245436	ENSG00000250420	-	832	4	804	2	22	77.4	0.48	21.333	2.76e-19	0.311253
Correlated	AAGAB	alpha- and gamma-adaptin binding protein [Source:HGNC Symbol;Acc:25662]	15	q23	-1	67493371	67547533	ENSG00000103591	+	1042	6	1003	3	30	96.93	0.58	19.296	1.84e-25	0.323062
Correlated	AAK1	AP2 associated kinase 1 [Source:HGNC Symbol;Acc:19679]	2	p13.3	-1	69688532	69901481	ENSG00000115977	-	1073	10	1026	9	28	99.81	0.93	14.861	1.59e-31	0.356606
Correlated	AASS	aminoadipate-semialdehyde synthase [Source:HGNC Symbol;Acc:17366]	7	q31.32	-1	121715701	121784334	ENSG00000008311	+	950	6	913	5	26	88.37	0.63	16.193	2.99e-21	0.307019
Correlated	AASS	aminoadipate-semialdehyde synthase [Source:HGNC Symbol;Acc:17366]	7	q31.32	-1	121715701	121784334	ENSG00000008311	-	950	9	912	6	23	88.37	0.95	17.813	1.59e-34	0.397581
Correlated	AATK	apoptosis-associated tyrosine kinase [Source:HGNC Symbol;Acc:21]	17	q25.3	-1	79091095	79139877	ENSG00000181409	-	885	7	855	1	22	82.33	0.79	26.703	3.44e-41	0.451839
Correlated	ABCA1	ATP-binding cassette, sub-family A (ABC1), member 1 [Source:HGNC Symbol;Acc:29]	9	q31.1	-1	107543283	107690518	ENSG00000165029	+	973	13	919	22	19	90.51	1.34	11.294	2.71e-30	0.366679
Correlated	ABCA2	ATP-binding cassette, sub-family A (ABC1), member 2 [Source:HGNC Symbol;Acc:32]	9	q34.3	-1	139901686	139923367	ENSG00000107331	-	959	9	923	6	21	89.21	0.94	19.18	3e-37	0.411819
Correlated	ABCA5	ATP-binding cassette, sub-family A (ABC1), member 5 [Source:HGNC Symbol;Acc:35]	17	q24.3	-1	67240452	67323385	ENSG00000154265	-	1060	9	1014	11	26	98.6	0.85	13.629	5.89e-26	0.323612
Correlated	ABCA6	ATP-binding cassette, sub-family A (ABC1), member 6 [Source:HGNC Symbol;Acc:36]	17	q24.3	-1	67074843	67138029	ENSG00000154262	-	936	6	906	2	22	87.07	0.64	25.071	3.25e-33	0.392472
Correlated	ABCA8	ATP-binding cassette, sub-family A (ABC1), member 8 [Source:HGNC Symbol;Acc:38]	17	q24.2	-1	66863433	66951533	ENSG00000141338	-	953	13	910	14	16	88.65	1.36	15.822	1.42e-43	0.448394
Correlated	ABCA9	ATP-binding cassette, sub-family A (ABC1), member 9 [Source:HGNC Symbol;Acc:39]	17	q24.2	-1	66970629	67057205	ENSG00000154258	-	1013	9	968	8	28	94.23	0.89	14.494	8.73e-28	0.343262
Correlated	ABCB1	ATP-binding cassette, sub-family B (MDR/TAP), member 1 [Source:HGNC Symbol;Acc:40]	7	q21.12	-1	87133175	87342611	ENSG00000085563	-	1036	12	988	13	23	96.37	1.16	14.208	7.42e-36	0.388372
Correlated	ABCB10	ATP-binding cassette, sub-family B (MDR/TAP), member 10 [Source:HGNC Symbol;Acc:41]	1	q42.13	-1	229652329	229694442	ENSG00000135776	+	1070	8	1031	2	29	99.53	0.75	23.135	2.03e-40	0.406893
Correlated	ABCB6	ATP-binding cassette, sub-family B (MDR/TAP), member 6 [Source:HGNC Symbol;Acc:47]	2	q35	-1	220074490	220083712	ENSG00000115657	+	967	5	933	3	26	89.95	0.52	19.496	1.17e-21	0.307437
Correlated	ABCB9	ATP-binding cassette, sub-family B (MDR/TAP), member 9 [Source:HGNC Symbol;Acc:50]	12	q24.31	-1	123405498	123466196	ENSG00000150967	-	966	10	931	6	19	89.86	1.04	20.819	7.01e-45	0.452489
Correlated	ABCC1	ATP-binding cassette, sub-family C (CFTR/MRP), member 1 [Source:HGNC Symbol;Acc:51]	16	p13.11	1	16043434	16236931	ENSG00000103222	-	892	7	862	3	20	82.98	0.78	23.126	1.76e-35	0.416237
Correlated	ABCC12	ATP-binding cassette, sub-family C (CFTR/MRP), member 12 [Source:HGNC Symbol;Acc:14640]	16	q12.1	-1	48116884	48189929	ENSG00000140798	-	881	5	853	0	23	81.95	0.57	31.464	3.48e-35	0.416993
Correlated	ABCC6P1	ATP-binding cassette, sub-family C, member 6 pseudogene 1 [Source:HGNC Symbol;Acc:33352]	16	p12.3	1	18582484	18609650	ENSG00000256340	-	977	7	941	1	28	90.88	0.72	24.425	1.21e-37	0.410271
Correlated	ABCD3	ATP-binding cassette, sub-family D (ALD), member 3 [Source:HGNC Symbol;Acc:67]	1	p21.3	1	94883933	94984222	ENSG00000117528	+	951	8	915	7	21	88.47	0.84	17.49	3.45e-30	0.370214
Correlated	ABCG1	ATP-binding cassette, sub-family G (WHITE), member 1 [Source:HGNC Symbol;Acc:73]	21	q22.3	1	43619799	43717354	ENSG00000160179	+	1050	11	1000	13	26	97.67	1.05	13.007	5.75e-30	0.350957
Correlated	ABHD11	abhydrolase domain containing 11 [Source:HGNC Symbol;Acc:16407]	HG1257_PATCH	q11.23	-1	73201051	73203824	ENSG00000262947	+	937	5	906	2	24	87.16	0.53	23.079	1.08e-25	0.342326
Correlated	ABHD12B	abhydrolase domain containing 12B [Source:HGNC Symbol;Acc:19837]	14	q22.1	1	51338878	51371688	ENSG00000131969	-	957	7	916	6	28	89.02	0.73	14.723	2.83e-22	0.313766
Correlated	ABHD2	abhydrolase domain containing 2 [Source:HGNC Symbol;Acc:18717]	15	q26.1	1	89630690	89745591	ENSG00000140526	+	1057	11	1005	14	27	98.33	1.04	12.239	4.64e-28	0.337801
Correlated	ABLIM2	actin binding LIM protein family, member 2 [Source:HGNC Symbol;Acc:19195]	4	p16.1	-1	7967039	8160559	ENSG00000163995	-	1019	8	977	6	28	94.79	0.79	16.175	7.33e-28	0.342746
Correlated	ABO	ABO blood group (transferase A, alpha 1-3-N-acetylgalactosaminyltransferase; transferase B, alpha 1-3-galactosyltransferase) [Source:HGNC Symbol;Acc:79]	HG79_PATCH	q34.2	-1	136125799	136150736	ENSG00000256062	-	932	3	902	0	27	86.7	0.32	31.067	1.86e-21	0.311599
Correlated	ABR	active BCR-related [Source:HGNC Symbol;Acc:81]	17	p13.3	-1	906758	1132315	ENSG00000159842	-	952	6	917	5	24	88.56	0.63	17.309	9.8e-23	0.318073
Correlated	ABTB1	ankyrin repeat and BTB (POZ) domain containing 1 [Source:HGNC Symbol;Acc:18275]	3	q21.3	1	127391778	127399768	ENSG00000114626	-	1009	11	964	10	24	93.86	1.09	15.101	3.41e-35	0.389696
Correlated	ACAD10	acyl-CoA dehydrogenase family, member 10 [Source:HGNC Symbol;Acc:21597]	12	q24.12	1	112123857	112194903	ENSG00000111271	+	1054	7	1013	5	29	98.05	0.66	17.079	6e-26	0.324478
Correlated	ACAD11	acyl-CoA dehydrogenase family, member 11 [Source:HGNC Symbol;Acc:30211]	3	q22.1	-1	132276982	132379567	ENSG00000240303	-	1045	9	1002	7	27	97.21	0.86	16.328	1.79e-31	0.361033
Correlated	ACADSB	acyl-CoA dehydrogenase, short/branched chain [Source:HGNC Symbol;Acc:91]	LRG_451		1	5001	54378	LRG_451	-	1058	11	1002	21	24	98.42	1.04	10.391	1.9e-23	0.30677
Correlated	ACAP1	ArfGAP with coiled-coil, ankyrin repeat and PH domains 1 [Source:HGNC Symbol;Acc:16467]	17	p13.1	1	7239848	7254797	ENSG00000072818	-	1038	9	995	7	27	96.56	0.87	16.219	2.95e-31	0.360937
Correlated	ACAT1	acetyl-CoA acetyltransferase 1 [Source:HGNC Symbol;Acc:93]	11	q22.3	1	107992243	108018503	ENSG00000075239	+	957	7	921	5	24	89.02	0.73	18.008	2.03e-27	0.350675
Correlated	ACBD5	acyl-CoA binding domain containing 5 [Source:HGNC Symbol;Acc:23338]	10	p12.1	-1	27484146	27531059	ENSG00000107897	+	1048	5	1010	2	31	97.49	0.48	20.794	3.75e-23	0.306133
Correlated	ACE2	angiotensin I converting enzyme 2 [Source:HGNC Symbol;Acc:13557]	X	p22.2	-1	15579156	15620271	ENSG00000130234	-	943	4	914	1	24	87.72	0.42	26.943	2.57e-24	0.331337
Correlated	ACHE	acetylcholinesterase [Source:HGNC Symbol;Acc:108]	7	q22.1	-1	100487615	100494594	ENSG00000087085	-	942	4	912	1	25	87.63	0.42	25.986	1.79e-23	0.325296
Correlated	ACLY	ATP citrate lyase [Source:HGNC Symbol;Acc:115]	HG185_PATCH	q21.2	-1	40023160	40075239	ENSG00000260245	-	971	9	931	11	20	90.33	0.93	15.067	6.87e-29	0.357938
Correlated	ACOT11	acyl-CoA thioesterase 11 [Source:HGNC Symbol;Acc:18156]	1	p32.3	1	55007930	55104865	ENSG00000162390	+	950	7	913	7	23	88.37	0.74	15.833	5.69e-24	0.327591
Correlated	ACP1	acid phosphatase 1, soluble [Source:HGNC Symbol;Acc:122]	2	p25.3	1	264140	278283	ENSG00000143727	+	953	7	918	5	23	88.65	0.73	18.531	3.13e-28	0.356904
Correlated	ACSL1	acyl-CoA synthetase long-chain family member 1 [Source:HGNC Symbol;Acc:3569]	4	q35.1	-1	185676749	185747972	ENSG00000151726	-	963	7	924	8	24	89.58	0.73	14.497	7.36e-22	0.309631
Correlated	ACSL3	acyl-CoA synthetase long-chain family member 3 [Source:HGNC Symbol;Acc:3570]	2	q36.1	1	223725652	223809357	ENSG00000123983	+	951	13	910	12	16	88.47	1.37	17.052	0	0.467776
Correlated	ACSL6	acyl-CoA synthetase long-chain family member 6 [Source:HGNC Symbol;Acc:16496]	5	q31.1	-1	131142683	131347936	ENSG00000164398	+	1061	8	1017	7	29	98.7	0.75	15.294	3.04e-26	0.325368
Correlated	ACSS3	acyl-CoA synthetase short-chain family member 3 [Source:HGNC Symbol;Acc:24723]	12	q21.31	1	81331594	81650533	ENSG00000111058	-	1034	10	987	12	25	96.19	0.97	13.429	2.76e-28	0.343
Correlated	ACTL6B	actin-like 6B [Source:HGNC Symbol;Acc:160]	7	q22.1	-1	100240720	100254084	ENSG00000077080	-	916	5	884	3	24	85.21	0.55	19.741	6.15e-22	0.318083
Correlated	ACTN2	actinin, alpha 2 [Source:HGNC Symbol;Acc:164]	1	q43	1	236849754	236927931	ENSG00000077522	-	928	7	897	2	22	86.33	0.75	24.889	2.87e-38	0.424599
Correlated	ACTR3B	ARP3 actin-related protein 3 homolog B (yeast) [Source:HGNC Symbol;Acc:17256]	7	q36.1	1	152456834	152552463	ENSG00000133627	-	959	11	923	7	18	89.21	1.15	20.209	0	0.469137
Correlated	ACTR3C	ARP3 actin-related protein 3 homolog C (yeast) [Source:HGNC Symbol;Acc:37282]	7	q36.1	-1	149941005	150020814	ENSG00000106526	-	974	7	937	4	26	90.6	0.72	18.782	1.15e-28	0.355906
Correlated	ACVR1C	activin A receptor, type IC [Source:HGNC Symbol;Acc:18123]	2	q24.1	-1	158388888	158485517	ENSG00000123612	-	904	12	866	9	17	84.09	1.33	17.813	1.4e-45	0.472024
Correlated	ADA	adenosine deaminase [Source:HGNC Symbol;Acc:186]	LRG_16		1	5001	37214	LRG_16	-	953	10	907	16	20	88.65	1.05	12.218	1.38e-25	0.338704
Correlated	ADAD1	adenosine deaminase domain containing 1 (testis-specific) [Source:HGNC Symbol;Acc:30713]	4	q27	1	123300121	123350957	ENSG00000164113	-	985	7	944	5	29	91.63	0.71	15.961	3.12e-24	0.323596
Correlated	ADAM10	ADAM metallopeptidase domain 10 [Source:HGNC Symbol;Acc:188]	15	q21.3	-1	58887403	59042177	ENSG00000137845	+	976	7	938	7	24	90.79	0.72	15.742	8.06e-24	0.322104
Correlated	ADAM11	ADAM metallopeptidase domain 11 [Source:HGNC Symbol;Acc:189]	17	q21.31	1	42836399	42859214	ENSG00000073670	-	1053	6	1015	2	30	97.95	0.57	21.937	4.86e-29	0.344669
Correlated	ADAM12	ADAM metallopeptidase domain 12 [Source:HGNC Symbol;Acc:190]	10	q26.2	-1	127700950	128077024	ENSG00000148848	+	1066	13	1013	16	24	99.16	1.22	12.915	5.78e-35	0.377836
Correlated	ADAM19	ADAM metallopeptidase domain 19 [Source:HGNC Symbol;Acc:197]	5	q33.3	-1	156822542	157002783	ENSG00000135074	-	976	9	940	5	22	90.79	0.92	20.24	2.13e-39	0.420376
Correlated	ADAM23	ADAM metallopeptidase domain 23 [Source:HGNC Symbol;Acc:202]	2	q33.3	1	207308263	207485851	ENSG00000114948	-	1058	11	1012	10	25	98.42	1.04	15.394	7.03e-36	0.384444
Correlated	ADAM28	ADAM metallopeptidase domain 28 [Source:HGNC Symbol;Acc:206]	8	p21.2	1	24151553	24216531	ENSG00000042980	+	1046	12	1002	9	23	97.3	1.15	17.078	1.3e-43	0.42818
Correlated	ADAM8	ADAM metallopeptidase domain 8 [Source:HGNC Symbol;Acc:215]	10	q26.3	-1	135075907	135090372	ENSG00000151651	+	953	8	912	10	23	88.65	0.84	13.663	2.64e-23	0.32217
Correlated	ADAM9	ADAM metallopeptidase domain 9 [Source:HGNC Symbol;Acc:216]	8	p11.22	1	38854388	38962663	ENSG00000168615	+	964	14	919	16	15	89.67	1.45	15.513	0	0.458065
Correlated	ADAMTS2	ADAM metallopeptidase with thrombospondin type 1 motif, 2 [Source:HGNC Symbol;Acc:218]	5	q35.3	-1	178537852	178772431	ENSG00000087116	-	1062	7	1022	5	28	98.79	0.66	17.7	6.57e-27	0.32958
Correlated	ADAMTS3	ADAM metallopeptidase with thrombospondin type 1 motif, 3 [Source:HGNC Symbol;Acc:219]	4	q13.3	-1	73146686	73434516	ENSG00000156140	+	965	7	933	3	22	89.77	0.73	23.293	1.04e-35	0.401541
Correlated	ADAMTS5	ADAM metallopeptidase with thrombospondin type 1 motif, 5 [Source:HGNC Symbol;Acc:221]	21	q21.3	-1	28290231	28338832	ENSG00000154736	+	1059	10	1006	15	28	98.51	0.94	11.147	3.93e-23	0.304398
Correlated	ADAMTS6	ADAM metallopeptidase with thrombospondin type 1 motif, 6 [Source:HGNC Symbol;Acc:222]	5	q12.3	-1	64444563	64777747	ENSG00000049192	+	1055	9	1006	12	28	98.14	0.85	12.22	4.1e-23	0.30484
Correlated	ADAMTS8	ADAM metallopeptidase with thrombospondin type 1 motif, 8 [Source:HGNC Symbol;Acc:224]	11	q24.3	-1	130274820	130298888	ENSG00000134917	-	1030	12	986	8	24	95.81	1.17	17.167	6.87e-44	0.432945
Correlated	ADAMTS9	ADAM metallopeptidase with thrombospondin type 1 motif, 9 [Source:HGNC Symbol;Acc:13202]	3	p14.1	-1	64501333	64673676	ENSG00000163638	-	1026	9	979	12	26	95.44	0.88	12.563	8.15e-24	0.314126
Correlated	ADAMTSL3	ADAMTS-like 3 [Source:HGNC Symbol;Acc:14633]	15	q25.2	1	84322838	84708594	ENSG00000156218	-	936	9	898	7	22	87.07	0.96	16.984	7.72e-33	0.390126
Correlated	ADAP1	ArfGAP with dual PH domains 1 [Source:HGNC Symbol;Acc:16486]	7	p22.3	-1	937540	995043	ENSG00000105963	-	961	11	924	7	19	89.4	1.14	19.576	0	0.460698
Correlated	ADAP2	ArfGAP with dual PH domains 2 [Source:HGNC Symbol;Acc:16487]	17	q11.2	1	29233362	29286340	ENSG00000184060	+	1030	12	981	13	24	95.81	1.17	13.733	1.38e-34	0.382197
Correlated	ADARB1	adenosine deaminase, RNA-specific, B1 [Source:HGNC Symbol;Acc:226]	21	q22.3	1	46493768	46646478	ENSG00000197381	-	1064	12	1017	12	23	98.98	1.13	15.2	1.65e-38	0.397836
Correlated	ADCY1	adenylate cyclase 1 (brain) [Source:HGNC Symbol;Acc:232]	7	p12.3	1	45613739	45762715	ENSG00000164742	-	1047	13	1002	9	23	97.4	1.24	17.186	0	0.44746
Correlated	ADCY2	adenylate cyclase 2 (brain) [Source:HGNC Symbol;Acc:233]	5	p15.31	1	7396321	7830194	ENSG00000078295	-	937	10	898	8	21	87.16	1.07	16.792	6.24e-36	0.408823
Correlated	ADCY5	adenylate cyclase 5 [Source:HGNC Symbol;Acc:236]	3	q21.1	-1	123001143	123168605	ENSG00000173175	-	1029	7	989	2	31	95.72	0.68	21.061	2.51e-32	0.369009
Correlated	ADCY6	adenylate cyclase 6 [Source:HGNC Symbol;Acc:237]	12	q13.12	-1	49159975	49182820	ENSG00000174233	-	959	7	929	1	22	89.21	0.73	28.935	1.26e-44	0.452446
Correlated	ADCY9	adenylate cyclase 9 [Source:HGNC Symbol;Acc:240]	16	p13.3	-1	4003388	4166186	ENSG00000162104	-	965	11	924	10	20	89.77	1.14	16.306	3.49e-38	0.415895
Correlated	ADCYAP1	adenylate cyclase activating polypeptide 1 (pituitary) [Source:HGNC Symbol;Acc:241]	18	p11.32	1	904944	912173	ENSG00000141433	-	1023	9	979	9	26	95.16	0.88	14.614	5.43e-28	0.342929
Correlated	ADD1	adducin 1 (alpha) [Source:HGNC Symbol;Acc:243]	4	p16.3	1	2845584	2931803	ENSG00000087274	+	1071	6	1032	1	32	99.63	0.56	24.158	4.4e-32	0.360262
Correlated	ADD1	adducin 1 (alpha) [Source:HGNC Symbol;Acc:243]	4	p16.3	1	2845584	2931803	ENSG00000087274	-	1071	7	1029	4	31	99.63	0.65	17.935	2.52e-27	0.330888
Correlated	ADD2	adducin 2 (beta) [Source:HGNC Symbol;Acc:244]	HG953_PATCH	p13.3	-1	70834750	70995357	ENSG00000271760	+	1067	10	1019	10	28	99.26	0.94	14.039	1.13e-29	0.346327
Correlated	ADIPOR1	adiponectin receptor 1 [Source:HGNC Symbol;Acc:24040]	1	q32.1	-1	202909951	202927700	ENSG00000159346	+	952	4	921	0	27	88.56	0.42	30.71	8.82e-28	0.354058
Correlated	ADIPOR2	adiponectin receptor 2 [Source:HGNC Symbol;Acc:24041]	12	p13.33	1	1797740	1897844	ENSG00000006831	+	950	4	920	0	26	88.37	0.42	31.667	1.27e-28	0.360096
Correlated	ADNP	activity-dependent neuroprotector homeobox [Source:HGNC Symbol;Acc:15766]	20	q13.13	-1	49505585	49547958	ENSG00000101126	+	1068	5	1032	1	30	99.35	0.47	25.429	2.31e-28	0.337983
Correlated	ADORA2A	adenosine A2a receptor [Source:HGNC Symbol;Acc:263]	22	q11.23	1	24813847	24838328	ENSG00000128271	-	949	6	917	3	23	88.28	0.63	21.816	7.99e-29	0.361628
Correlated	ADRA1B	adrenoceptor alpha 1B [Source:HGNC Symbol;Acc:278]	5	q33.3	1	159343790	159399551	ENSG00000170214	-	937	6	905	2	24	87.16	0.64	23.425	4.91e-31	0.378466
Correlated	ADRB1	adrenoceptor beta 1 [Source:HGNC Symbol;Acc:285]	10	q25.3	1	115803806	115806667	ENSG00000043591	-	1057	10	1015	5	27	98.33	0.95	19.045	5.56e-41	0.412354
Correlated	ADRBK2	adrenergic, beta, receptor kinase 2 [Source:HGNC Symbol;Acc:290]	22	q12.1	1	25960816	26125259	ENSG00000100077	-	1071	12	1019	14	26	99.63	1.12	13.008	1.35e-32	0.363282
Correlated	ADTRP	androgen-dependent TFPI-regulating protein [UniGene: NA]						unknown	-	1016	9	972	9	26	94.51	0.89	14.514	8.54e-28	0.342818
Correlated	AFAP1L1	actin filament associated protein 1-like 1 [Source:HGNC Symbol;Acc:26714]	5	q32	1	148651434	148721365	ENSG00000157510	-	1036	6	998	3	29	96.37	0.58	19.733	4.83e-26	0.32792
Correlated	AFAP1L1	actin filament associated protein 1-like 1 [Source:HGNC Symbol;Acc:26714]	5	q32	1	148651434	148721365	ENSG00000157510	+	1036	9	991	10	26	96.37	0.87	14.021	8.97e-27	0.332797
Correlated	AFF2	AF4/FMR2 family, member 2 [Source:HGNC Symbol;Acc:3776]	HG1459_PATCH	q28	1	147582336	148082384	ENSG00000269754	+	954	6	920	5	23	88.74	0.63	17.944	1.41e-23	0.324021
Correlated	AFP	alpha-fetoprotein [Source:HGNC Symbol;Acc:317]	4	q13.3	1	74296855	74321891	ENSG00000081051	+	925	4	893	1	27	86.05	0.43	23.871	1.31e-21	0.31397
Correlated	AGA	aspartylglucosaminidase [Source:HGNC Symbol;Acc:318]	4	q34.3	-1	178351924	178363657	ENSG00000038002	+	965	8	928	5	24	89.77	0.83	18.558	3.73e-32	0.379975
Correlated	AGAP3	ArfGAP with GTPase domain, ankyrin repeat and PH domain 3 [Source:HGNC Symbol;Acc:16923]	7	q36.1	1	150782918	150841523	ENSG00000133612	-	1068	10	1022	10	26	99.35	0.94	14.833	1.94e-31	0.356921
Correlated	AGMAT	agmatine ureohydrolase (agmatinase) [Source:HGNC Symbol;Acc:18407]	1	p36.21	-1	15898848	15911605	ENSG00000116771	-	1027	9	979	11	28	95.53	0.88	12.491	1.1e-23	0.313057
Correlated	AGO4	argonaute RISC catalytic component 4 [UniGene: NA]						unknown	+	1050	8	1007	6	29	97.67	0.76	16.216	6.34e-28	0.338055
Correlated	AGPAT2	1-acylglycerol-3-phosphate O-acyltransferase 2 [Source:HGNC Symbol;Acc:325]	9	q34.3	-1	139567595	139581875	ENSG00000169692	-	969	6	936	4	23	90.14	0.62	20.048	2.05e-26	0.34165
Correlated	AGPAT3	1-acylglycerol-3-phosphate O-acyltransferase 3 [Source:HGNC Symbol;Acc:326]	21	q22.3	1	45285067	45406417	ENSG00000160216	+	1073	8	1030	5	30	99.81	0.75	17.377	5.07e-30	0.347506
Correlated	AGPAT3	1-acylglycerol-3-phosphate O-acyltransferase 3 [Source:HGNC Symbol;Acc:326]	21	q22.3	1	45285067	45406417	ENSG00000160216	-	1073	12	1013	22	26	99.81	1.12	9.9659	2.43e-24	0.310777
Correlated	AGPAT4	1-acylglycerol-3-phosphate O-acyltransferase 4 [Source:HGNC Symbol;Acc:20885]	6	q26	-1	161551011	161695093	ENSG00000026652	-	1051	11	1004	11	25	97.77	1.05	14.597	6.58e-34	0.374431
Correlated	AGPAT5	1-acylglycerol-3-phosphate O-acyltransferase 5 [Source:HGNC Symbol;Acc:20886]	8	p23.1	1	6565878	6617184	ENSG00000155189	+	1069	6	1029	4	30	99.44	0.56	17.817	1.98e-23	0.305065
Correlated	AGPAT9	1-acylglycerol-3-phosphate O-acyltransferase 9 [Source:HGNC Symbol;Acc:28157]	4	q21.23	1	84457067	84527028	ENSG00000138678	-	1021	16	966	20	19	94.98	1.57	12.965	3.83e-43	0.430967
Correlated	AGTPBP1	ATP/GTP binding protein 1 [Source:HGNC Symbol;Acc:17258]	9	q21.33	-1	88161455	88356944	ENSG00000135049	-	975	9	934	10	22	90.7	0.92	14.898	1.46e-28	0.355058
Correlated	AGTR1	angiotensin II receptor, type 1 [Source:HGNC Symbol;Acc:336]	3	q24	1	148415571	148460795	ENSG00000144891	-	965	9	928	8	20	89.77	0.93	17.617	4.65e-34	0.391674
Correlated	AGTRAP	angiotensin II receptor-associated protein [Source:HGNC Symbol;Acc:13539]	1	p36.22	1	11796141	11814859	ENSG00000177674	+	1068	6	1028	4	30	99.35	0.56	17.8	2.08e-23	0.305055
Correlated	AHCY	adenosylhomocysteinase [Source:HGNC Symbol;Acc:343]	20	q11.22	-1	32868074	32899608	ENSG00000101444	+	951	4	922	0	25	88.47	0.42	32.793	1.3e-29	0.366456
Correlated	AIF1	allograft inflammatory factor 1 [Source:HGNC Symbol;Acc:352]	HSCHR6_MHC_COX	p21.33	1	31570375	31572212	ENSG00000237727	-	952	8	911	10	23	88.56	0.84	13.649	2.79e-23	0.322152
Correlated	AIF1L	allograft inflammatory factor 1-like [Source:HGNC Symbol;Acc:28904]	9	q34.12	1	133971863	133998539	ENSG00000126878	-	1001	9	958	8	26	93.12	0.9	15.141	4.38e-29	0.3538
Correlated	AIFM3	apoptosis-inducing factor, mitochondrion-associated, 3 [Source:HGNC Symbol;Acc:26398]	22	q11.21	1	21319396	21335649	ENSG00000183773	-	1021	6	982	3	30	94.98	0.59	18.907	5.97e-25	0.322847
Correlated	AJAP1	adherens junctions associated protein 1 [Source:HGNC Symbol;Acc:30801]	1	p36.32	1	4714792	4852594	ENSG00000196581	-	938	9	905	3	21	87.26	0.96	23.45	0	0.464536
Correlated	AJUBA	ajuba LIM protein [UniGene: NA]						unknown	+	1061	11	1016	10	24	98.7	1.04	15.879	4.59e-37	0.390503
Correlated	AK2	adenylate kinase 2 [Source:HGNC Symbol;Acc:362]	LRG_133		1	5001	33907	LRG_133	+	972	7	935	6	24	90.42	0.72	16.883	1.26e-25	0.335654
Correlated	AK5	adenylate kinase 5 [Source:HGNC Symbol;Acc:365]	1	p31.1	1	77747736	78025651	ENSG00000154027	-	1040	13	995	9	23	96.74	1.25	17.071	0	0.44736
Correlated	AKAP1	A kinase (PRKA) anchor protein 1 [Source:HGNC Symbol;Acc:367]	17	q22	1	55162453	55198710	ENSG00000121057	+	965	4	935	1	25	89.77	0.41	26.621	4.97e-24	0.325463
Correlated	AKAP13	A kinase (PRKA) anchor protein 13 [Source:HGNC Symbol;Acc:371]	15	q25.3	1	85923802	86292586	ENSG00000170776	-	1074	10	1026	10	28	99.91	0.93	14.132	7.13e-30	0.346436
Correlated	AKNA	AT-hook transcription factor [Source:HGNC Symbol;Acc:24108]	9	q32	-1	117096436	117156685	ENSG00000106948	+	1047	11	1001	9	26	97.4	1.05	15.564	2.5e-36	0.388988
Correlated	AKT2	v-akt murine thymoma viral oncogene homolog 2 [Source:HGNC Symbol;Acc:392]	19	q13.2	-1	40736224	40791443	ENSG00000105221	-	1049	7	1005	6	31	97.58	0.67	14.864	1.81e-22	0.301098
Correlated	AKT3	v-akt murine thymoma viral oncogene homolog 3 [Source:HGNC Symbol;Acc:393]	1	q44	-1	243651535	244014381	ENSG00000117020	-	1063	15	1007	18	23	98.88	1.41	12.715	1.41e-39	0.403759
Correlated	ALAD	aminolevulinate dehydratase [Source:HGNC Symbol;Acc:395]	9	q32	-1	116148597	116163613	ENSG00000148218	+	904	7	869	4	24	84.09	0.77	18.557	2.44e-28	0.367197
Correlated	ALAS1	aminolevulinate, delta-, synthase 1 [Source:HGNC Symbol;Acc:396]	3	p21.2	1	52232102	52248343	ENSG00000023330	-	950	5	918	3	24	88.37	0.53	20.474	9.66e-23	0.318454
Correlated	ALDH16A1	aldehyde dehydrogenase 16 family, member A1 [Source:HGNC Symbol;Acc:28114]	19	q13.33	1	49956426	49974305	ENSG00000161618	+	1045	6	1008	1	30	97.21	0.57	24.881	4.82e-33	0.370431
Correlated	ALDH1A2	aldehyde dehydrogenase 1 family, member A2 [Source:HGNC Symbol;Acc:15472]	15	q21.3	-1	58245622	58790065	ENSG00000128918	-	946	11	896	21	18	88	1.16	11.213	1.42e-25	0.339848
Correlated	ALDH1A3	aldehyde dehydrogenase 1 family, member A3 [Source:HGNC Symbol;Acc:409]	15	q26.3	1	101402129	101456831	ENSG00000184254	-	951	10	900	19	22	88.47	1.05	10.248	3.8e-21	0.306049
Correlated	ALDH3A2	aldehyde dehydrogenase 3 family, member A2 [Source:HGNC Symbol;Acc:403]	17	p11.2	1	19551449	19580911	ENSG00000072210	-	972	9	928	15	20	90.42	0.93	12.569	7.97e-24	0.322804
Correlated	ALDH3B1	aldehyde dehydrogenase 3 family, member B1 [Source:HGNC Symbol;Acc:410]	11	q13.2	1	67776048	67796744	ENSG00000006534	+	967	10	933	5	19	89.95	1.03	22.23	0	0.468568
Correlated	ALDH3B2	aldehyde dehydrogenase 3 family, member B2 [Source:HGNC Symbol;Acc:411]	11	q13.2	-1	67429633	67448671	ENSG00000132746	+	930	5	898	4	23	86.51	0.54	18.452	1.87e-20	0.303964
Correlated	ALDH6A1	aldehyde dehydrogenase 6 family, member A1 [Source:HGNC Symbol;Acc:7179]	14	q24.3	-1	74523553	74551196	ENSG00000119711	+	961	5	928	3	25	89.4	0.52	20.021	3.08e-22	0.312834
Correlated	ALDH8A1	aldehyde dehydrogenase 8 family, member A1 [Source:HGNC Symbol;Acc:15471]	6	q23.3	-1	135238528	135271260	ENSG00000118514	-	932	6	902	1	23	86.7	0.64	27.547	1.36e-36	0.413852
Correlated	ALDOA	aldolase A, fructose-bisphosphate [Source:HGNC Symbol;Acc:414]	16	p11.2	1	30064411	30081778	ENSG00000149925	+	1051	8	1010	3	30	97.77	0.76	20.115	5.28e-35	0.380748
Correlated	ALG12	ALG12, alpha-1,6-mannosyltransferase [Source:HGNC Symbol;Acc:19358]	22	q13.33	-1	50296867	50312106	ENSG00000182858	+	925	3	896	0	26	86.05	0.32	31.897	5.25e-22	0.317066
Correlated	ALG6	ALG6, alpha-1,3-glucosyltransferase [Source:HGNC Symbol;Acc:23157]	1	p31.3	1	63833261	63904233	ENSG00000088035	+	960	4	929	1	26	89.3	0.42	25.6	3.94e-23	0.319696
Correlated	ALKBH1	alkB, alkylation repair homolog 1 (E. coli) [Source:HGNC Symbol;Acc:17911]	14	q24.3	-1	78138747	78174363	ENSG00000100601	-	1067	5	1029	1	32	99.26	0.47	24.032	7.96e-27	0.328264
Correlated	ALPK1	alpha-kinase 1 [Source:HGNC Symbol;Acc:20917]	4	q25	1	113206665	113363776	ENSG00000073331	+	1059	10	1014	9	26	98.51	0.94	15.482	6.5e-33	0.367211
Correlated	ALPK3	alpha-kinase 3 [Source:HGNC Symbol;Acc:17574]	15	q25.3	1	85359911	85416713	ENSG00000136383	+	1041	9	1001	5	26	96.84	0.86	19.12	3.91e-37	0.394622
Correlated	ALS2CL	ALS2 C-terminal like [Source:HGNC Symbol;Acc:20605]	3	p21.31	-1	46710487	46735194	ENSG00000178038	-	1033	8	991	5	29	96.09	0.77	17.181	1.09e-29	0.352083
Correlated	ALX1	ALX homeobox 1 [Source:HGNC Symbol;Acc:1494]	12	q21.31	1	85673885	85695562	ENSG00000180318	+	936	8	903	3	22	87.07	0.85	22.691	1.33e-39	0.430427
Correlated	AMBP	alpha-1-microglobulin/bikunin precursor [Source:HGNC Symbol;Acc:453]	9	q32	-1	116822407	116840752	ENSG00000106927	-	905	7	874	3	21	84.19	0.77	22.625	1.06e-34	0.408436
Correlated	AMER3	APC membrane recruitment protein 3 [UniGene: NA]						unknown	-	1013	10	973	4	26	94.23	0.99	20.099	2.12e-43	0.434011
Correlated	AMH	anti-Mullerian hormone [Source:HGNC Symbol;Acc:464]	19	p13.3	1	2248666	2252072	ENSG00000104899	+	943	6	911	3	23	87.72	0.64	21.678	1.21e-28	0.361564
Correlated	AMIGO1	adhesion molecule with Ig-like domain 1 [Source:HGNC Symbol;Acc:20824]	1	p13.3	-1	110046797	110052360	ENSG00000181754	-	1014	7	976	3	28	94.33	0.69	20.28	4.9e-31	0.363817
Correlated	AMMECR1	Alport syndrome, mental retardation, midface hypoplasia and elliptocytosis chromosomal region gene 1 [Source:HGNC Symbol;Acc:467]	X	q23	-1	109437414	109683461	ENSG00000101935	+	1071	11	1026	8	26	99.63	1.03	16.758	2.88e-39	0.400604
Correlated	AMOTL1	angiomotin like 1 [Source:HGNC Symbol;Acc:17811]	11	q21	1	94439597	94609918	ENSG00000166025	+	1069	9	1024	7	29	99.44	0.84	15.824	1.87e-30	0.350812
Correlated	AMPD3	adenosine monophosphate deaminase 3 [Source:HGNC Symbol;Acc:470]	11	p15.4	1	10329860	10529126	ENSG00000133805	-	946	8	909	6	23	88	0.85	17.438	3.92e-30	0.370826
Correlated	AMPH	amphiphysin [Source:HGNC Symbol;Acc:471]	7	p14.1	-1	38423305	38671167	ENSG00000078053	-	949	10	914	4	21	88.28	1.05	21.866	0	0.469207
Correlated	AMY1A	amylase, alpha 1A (salivary) [Source:HGNC Symbol;Acc:474]	1	p21.1	1	104197912	104207173	ENSG00000237763	-	863	6	829	7	21	80.28	0.7	14.752	2.74e-19	0.305641
Correlated	ANGPT1	angiopoietin 1 [Source:HGNC Symbol;Acc:484]	8	q23.1	-1	108261721	108510283	ENSG00000154188	+	944	7	906	7	24	87.81	0.74	15.226	5e-23	0.321621
Correlated	ANGPT1	angiopoietin 1 [Source:HGNC Symbol;Acc:484]	8	q23.1	-1	108261721	108510283	ENSG00000154188	-	944	11	902	11	20	87.81	1.17	15.226	1.57e-35	0.404919
Correlated	ANGPTL1	angiopoietin-like 1 [Source:HGNC Symbol;Acc:489]	1	q25.2	-1	178818840	178840187	ENSG00000116194	-	1049	11	1001	11	26	97.58	1.05	14.176	7.1e-33	0.368731
Correlated	ANK2	ankyrin 2, neuronal [Source:HGNC Symbol;Acc:493]	4	q25	1	113739265	114304896	ENSG00000145362	-	1054	13	1007	9	25	98.05	1.23	16.39	2.8e-45	0.434564
Correlated	ANK3	ankyrin 3, node of Ranvier (ankyrin G) [Source:HGNC Symbol;Acc:494]	10	q21.2	-1	61788159	62493248	ENSG00000151150	-	1066	12	1007	22	25	99.16	1.13	10.169	6.82e-25	0.315567
Correlated	ANKDD1A	ankyrin repeat and death domain containing 1A [Source:HGNC Symbol;Acc:28002]	15	q22.31	1	65204101	65251042	ENSG00000166839	-	1044	8	1002	4	30	97.12	0.77	18.316	9.42e-32	0.362899
Correlated	ANKFN1	ankyrin-repeat and fibronectin type III domain containing 1 [Source:HGNC Symbol;Acc:26766]	17	q22	1	54188319	54589020	ENSG00000153930	+	905	7	874	2	22	84.19	0.77	24.272	2.52e-37	0.424374
Correlated	ANKRD13B	ankyrin repeat domain 13B [Source:HGNC Symbol;Acc:26363]	17	q11.2	1	27916787	27941779	ENSG00000198720	-	1033	5	996	2	30	96.09	0.48	21.082	1.8e-23	0.31063
Correlated	ANKRD18A	ankyrin repeat domain 18A [Source:HGNC Symbol;Acc:23643]	9	p13.1	-1	38540564	38620657	ENSG00000180071	-	1010	8	965	7	30	93.95	0.79	14.175	2.83e-24	0.319858
Correlated	ANKRD20A9P	ankyrin repeat domain 20 family, member A9, pseudogene [Source:HGNC Symbol;Acc:42023]	13	q11	-1	19390858	19446107	ENSG00000206192	-	873	6	839	4	24	81.21	0.69	17.46	5.29e-23	0.33425
Correlated	ANKRD30B	ankyrin repeat domain 30B [Source:HGNC Symbol;Acc:24165]	18	p11.21	1	14728271	14852737	ENSG00000180777	-	871	5	840	3	23	81.02	0.57	19.442	1.29e-21	0.323603
Correlated	ANKRD33B	ankyrin repeat domain 33B [Source:HGNC Symbol;Acc:35240]	5	p15.2	1	10564442	10650308	ENSG00000164236	-	1010	9	974	2	25	93.95	0.89	24.305	0	0.45643
Correlated	ANKRD34A	ankyrin repeat domain 34A [Source:HGNC Symbol;Acc:27639]	1	q21.1	1	145470508	145475646	ENSG00000181039	-	983	7	945	3	28	91.44	0.71	19.66	4.37e-30	0.363484
Correlated	ANKRD35	ankyrin repeat domain 35 [Source:HGNC Symbol;Acc:26323]	HG1287_PATCH	q21.1	-1	146552975	146572260	ENSG00000263773	-	1023	8	979	8	28	95.16	0.78	14.208	2.7e-24	0.31797
Correlated	ANKRD36BP2	ankyrin repeat domain 36B pseudogene 2 [Source:HGNC Symbol;Acc:33607]	2	p11.2	1	89065324	89106126	ENSG00000230006	-	928	7	893	4	24	86.33	0.75	19.05	4.29e-29	0.367511
Correlated	ANKRD6	ankyrin repeat domain 6 [Source:HGNC Symbol;Acc:17280]	6	q15	1	90142889	90343553	ENSG00000135299	-	929	9	892	8	20	86.42	0.97	16.959	9.15e-33	0.391131
Correlated	ANKRD65	ankyrin repeat domain 65 [UniGene: NA]						unknown	-	996	7	959	2	28	92.65	0.7	22.133	5.44e-34	0.385126
Correlated	ANKRD9	ankyrin repeat domain 9 [Source:HGNC Symbol;Acc:20096]	14	q32.31	-1	102973179	102976136	ENSG00000156381	-	1020	12	974	8	26	94.88	1.18	16.105	4.57e-41	0.420223
Correlated	ANKS1B	ankyrin repeat and sterile alpha motif domain containing 1B [Source:HGNC Symbol;Acc:24600]	12	q23.1	-1	99120235	100378432	ENSG00000185046	-	1052	10	1010	7	25	97.86	0.95	17.681	7.25e-38	0.39659
Correlated	ANKZF1	ankyrin repeat and zinc finger domain containing 1 [Source:HGNC Symbol;Acc:25527]	2	q35	1	220094479	220101391	ENSG00000163516	+	964	8	928	5	23	89.67	0.83	19.136	3.52e-33	0.386522
Correlated	ANLN	anillin, actin binding protein [Source:HGNC Symbol;Acc:14082]	7	p14.2	1	36429415	36493400	ENSG00000011426	+	1049	14	990	23	22	97.58	1.33	11.026	1.21e-31	0.36138
Correlated	ANO3	anoctamin 3 [Source:HGNC Symbol;Acc:14004]	11	p14.2	1	26210829	26684835	ENSG00000134343	-	933	8	901	3	21	86.79	0.86	23.398	7.46e-41	0.438185
Correlated	ANO4	anoctamin 4 [Source:HGNC Symbol;Acc:23837]	HSCHR12_3_CTG2_1	q23.1	1	101505377	101522419	ENSG00000262139	+	1012	7	971	5	29	94.14	0.69	16.398	6.64e-25	0.323956
Correlated	ANO5	anoctamin 5 [Source:HGNC Symbol;Acc:27337]	11	p14.3	1	22214722	22304903	ENSG00000171714	-	994	8	949	9	28	92.47	0.8	12.993	4.08e-22	0.306683
Correlated	ANPEP	alanyl (membrane) aminopeptidase [Source:HGNC Symbol;Acc:500]	15	q26.1	-1	90328120	90358633	ENSG00000166825	-	1039	12	997	7	23	96.65	1.15	18.749	0	0.452288
Correlated	ANXA11	annexin A11 [Source:HGNC Symbol;Acc:535]	10	q22.3	-1	81910645	81965328	ENSG00000122359	-	1075	11	1024	13	27	100	1.02	12.966	7.5e-30	0.346143
Correlated	ANXA2	annexin A2 [Source:HGNC Symbol;Acc:537]	15	q22.2	-1	60639333	60695082	ENSG00000182718	+	960	9	914	16	21	89.3	0.94	11.52	1.04e-21	0.308958
Correlated	ANXA2P2	annexin A2 pseudogene 2 [Source:HGNC Symbol;Acc:539]	9	p13.3	1	33624223	33625532	ENSG00000231991	+	821	7	789	6	19	76.37	0.85	17.003	7.12e-26	0.367087
Correlated	ANXA2R	annexin A2 receptor [UniGene: NA]						unknown	+	1045	9	1003	4	29	97.21	0.86	19.038	4.97e-37	0.393286
Correlated	ANXA6	annexin A6 [Source:HGNC Symbol;Acc:544]	5	q33.1	-1	150480273	150537443	ENSG00000197043	-	920	8	883	6	23	85.58	0.87	16.959	2.71e-29	0.370444
Correlated	ANXA8L1	annexin A8-like 1 [Source:HGNC Symbol;Acc:23334]	10	q11.22	-1	47157983	47174093	ENSG00000150165	+	822	6	792	4	20	76.47	0.73	18.969	5.01e-25	0.360397
Correlated	AOC2	amine oxidase, copper containing 2 (retina-specific) [Source:HGNC Symbol;Acc:549]	17	q21.31	1	40996617	41002724	ENSG00000131480	-	962	6	930	1	25	89.49	0.62	26.599	2.48e-35	0.399924
Correlated	AOC3	amine oxidase, copper containing 3 [Source:HGNC Symbol;Acc:550]	17	q21.31	1	41003201	41010147	ENSG00000131471	-	943	6	909	5	23	87.72	0.64	17.737	2.63e-23	0.32388
Correlated	AP1G2	adaptor-related protein complex 1, gamma 2 subunit [Source:HGNC Symbol;Acc:556]	14	q11.2	-1	24028774	24037279	ENSG00000213983	+	947	6	916	2	23	88.09	0.63	24.491	1.92e-32	0.385388
Correlated	AP1M2	adaptor-related protein complex 1, mu 2 subunit [Source:HGNC Symbol;Acc:558]	19	p13.2	-1	10683347	10697991	ENSG00000129354	-	932	8	894	9	21	86.7	0.86	15.124	6.13e-26	0.345
Correlated	AP1M2	adaptor-related protein complex 1, mu 2 subunit [Source:HGNC Symbol;Acc:558]	19	p13.2	-1	10683347	10697991	ENSG00000129354	+	932	5	900	3	24	86.7	0.54	20.086	2.57e-22	0.318261
Correlated	AP1S1	adaptor-related protein complex 1, sigma 1 subunit [Source:HGNC Symbol;Acc:559]	7	q22.1	1	100797678	100804877	ENSG00000106367	-	963	10	925	9	19	89.58	1.04	17.477	2.05e-37	0.41191
Correlated	AP1S2	adaptor-related protein complex 1, sigma 2 subunit [Source:HGNC Symbol;Acc:560]	X	p22.2	-1	15843929	15873054	ENSG00000182287	-	1068	11	1018	13	26	99.35	1.03	13.23	1.67e-30	0.351272
Correlated	AP1S2	adaptor-related protein complex 1, sigma 2 subunit [Source:HGNC Symbol;Acc:560]	X	p22.2	-1	15843929	15873054	ENSG00000182287	+	1068	15	1011	20	22	99.35	1.4	12.371	2.13e-38	0.396498
Correlated	AP1S3	adaptor-related protein complex 1, sigma 3 subunit [Source:HGNC Symbol;Acc:18971]	2	q36.1	-1	224616403	224702744	ENSG00000152056	+	994	7	952	6	29	92.47	0.7	14.868	1.73e-22	0.30946
Correlated	AP2B1	adaptor-related protein complex 2, beta 1 subunit [Source:HGNC Symbol;Acc:563]	HG385_PATCH	q12	1	33905065	34053436	ENSG00000270478	+	957	6	924	2	25	89.02	0.63	23.153	1.14e-30	0.372155
Correlated	AP3B2	adaptor-related protein complex 3, beta 2 subunit [Source:HGNC Symbol;Acc:567]	15	q25.2	-1	83328033	83378666	ENSG00000103723	-	952	5	918	3	26	88.56	0.53	19.194	2.52e-21	0.307275
Correlated	AP3M2	adaptor-related protein complex 3, mu 2 subunit [Source:HGNC Symbol;Acc:570]	8	p11.21	1	42010464	42029191	ENSG00000070718	+	971	5	939	3	24	90.33	0.51	20.927	3.08e-23	0.31867
Correlated	APBA1	amyloid beta (A4) precursor protein-binding, family A, member 1 [Source:HGNC Symbol;Acc:578]	9	q21.12	-1	72042446	72287222	ENSG00000107282	-	1065	12	1020	8	25	99.07	1.13	17.27	3.78e-44	0.427028
Correlated	APBA2	amyloid beta (A4) precursor protein-binding, family A, member 2 [Source:HGNC Symbol;Acc:579]	15	q13.1	1	29129629	29410518	ENSG00000034053	-	952	11	912	11	18	88.56	1.16	16.414	1.91e-38	0.420221
Correlated	APBB1	amyloid beta (A4) precursor protein-binding, family B, member 1 (Fe65) [Source:HGNC Symbol;Acc:581]	11	p15.4	-1	6416355	6440644	ENSG00000166313	-	969	8	937	3	21	90.14	0.83	24.301	1.97e-42	0.438553
Correlated	APBB1IP	amyloid beta (A4) precursor protein-binding, family B, member 1 interacting protein [Source:HGNC Symbol;Acc:17379]	10	p12.1	1	26727132	26856732	ENSG00000077420	-	1051	8	1007	8	28	97.77	0.76	14.597	5.61e-25	0.318389
Correlated	APEX2	APEX nuclease (apurinic/apyrimidinic endonuclease) 2 [Source:HGNC Symbol;Acc:17889]	X	p11.21	1	55026790	55035490	ENSG00000169188	+	1063	7	1023	5	28	98.88	0.66	17.717	6.2e-27	0.329592
Correlated	APLN	apelin [Source:HGNC Symbol;Acc:16665]	X	q26.1	-1	128779240	128788933	ENSG00000171388	+	1053	5	1014	2	32	97.95	0.47	20.328	1.23e-22	0.301737
Correlated	APLP1	amyloid beta (A4) precursor-like protein 1 [Source:HGNC Symbol;Acc:597]	19	q13.12	1	36358801	36370693	ENSG00000105290	-	942	7	907	4	24	87.63	0.74	19.337	1.56e-29	0.367686
Correlated	APLP2	amyloid beta (A4) precursor-like protein 2 [Source:HGNC Symbol;Acc:598]	11	q24.3	1	129939732	130014699	ENSG00000084234	+	1032	12	988	9	23	96	1.16	16.849	5.18e-43	0.427978
Correlated	APOA2	apolipoprotein A-II [Source:HGNC Symbol;Acc:601]	1	q23.3	-1	161192082	161193421	ENSG00000158874	+	896	4	867	1	24	83.35	0.45	25.6	3.87e-23	0.330979
Correlated	APOB	apolipoprotein B [Source:HGNC Symbol;Acc:603]	2	p24.1	-1	21224301	21266945	ENSG00000084674	+	1010	7	969	5	29	93.95	0.69	16.366	7.45e-25	0.32393
Correlated	APOBEC1	apolipoprotein B mRNA editing enzyme, catalytic polypeptide 1 [Source:HGNC Symbol;Acc:604]	12	p13.31	-1	7801996	7818499	ENSG00000111701	+	910	4	881	0	25	84.65	0.44	31.379	2.25e-28	0.366231
Correlated	APOBR	apolipoprotein B receptor [Source:HGNC Symbol;Acc:24087]	16	p11.2	1	28505970	28510291	ENSG00000184730	-	929	4	899	2	24	86.42	0.43	22.119	5.75e-20	0.300169
Correlated	APOC1	apolipoprotein C-I [Source:HGNC Symbol;Acc:607]	19	q13.32	1	45417504	45422606	ENSG00000130208	+	947	13	908	8	18	88.09	1.37	18.911	0	0.496198
Correlated	APOD	apolipoprotein D [Source:HGNC Symbol;Acc:612]	3	q29	-1	195295573	195311076	ENSG00000189058	-	929	8	895	5	21	86.42	0.86	19.714	3.21e-34	0.400182
Correlated	APOL4	apolipoprotein L, 4 [Source:HGNC Symbol;Acc:14867]	22	q12.3	-1	36585172	36600886	ENSG00000100336	+	988	11	946	7	24	91.91	1.11	17.251	1.45e-40	0.424241
Correlated	APOM	apolipoprotein M [Source:HGNC Symbol;Acc:13916]	HSCHR6_MHC_SSTO	p21.33	1	31610134	31615927	ENSG00000235754	+	970	5	941	0	24	90.23	0.52	33.448	2.4e-37	0.410031
Correlated	APOOL	apolipoprotein O-like [Source:HGNC Symbol;Acc:24009]	X	q21.1	1	84258832	84343069	ENSG00000155008	+	1033	8	993	5	27	96.09	0.77	18.163	1.99e-31	0.362848
Correlated	APPL2	adaptor protein, phosphotyrosine interaction, PH domain and leucine zipper containing 2 [Source:HGNC Symbol;Acc:18242]	12	q23.3	-1	105567074	105630016	ENSG00000136044	+	935	6	899	6	24	86.98	0.64	15.583	2.09e-20	0.302749
Correlated	APRT	adenine phosphoribosyltransferase [Source:HGNC Symbol;Acc:626]	16	q24.3	-1	88875747	88878352	ENSG00000198931	+	955	6	922	2	25	88.84	0.63	23.105	1.32e-30	0.372136
Correlated	AQP1	aquaporin 1 (Colton blood group) [Source:HGNC Symbol;Acc:633]	7	p14.3	1	30893010	30965131	ENSG00000240583	-	933	8	891	13	21	86.79	0.86	12.256	9.23e-21	0.305927
Correlated	AQP1	aquaporin 1 (Colton blood group) [Source:HGNC Symbol;Acc:633]	7	p14.3	1	30893010	30965131	ENSG00000240583	+	933	10	899	5	19	86.79	1.07	21.448	0	0.468162
Correlated	AQP12A	aquaporin 12A [Source:HGNC Symbol;Acc:19941]	2	q37.3	1	241631262	241637900	ENSG00000184945	-	884	4	855	0	25	82.23	0.45	30.483	1.37e-27	0.366077
Correlated	AQP12B	aquaporin 12B [Source:HGNC Symbol;Acc:6096]	2	q37.3	-1	241615835	241622323	ENSG00000185176	-	877	4	848	1	24	81.58	0.46	25.057	1.16e-22	0.330823
Correlated	AQP8	aquaporin 8 [Source:HGNC Symbol;Acc:642]	16	p12.1	1	25227052	25240261	ENSG00000103375	-	917	6	885	4	22	85.3	0.65	19.65	6.68e-26	0.347539
Correlated	AQP9	aquaporin 9 [Source:HGNC Symbol;Acc:643]	15	q21.3	1	58430368	58478110	ENSG00000103569	-	945	9	913	4	19	87.91	0.95	23.365	1.4e-45	0.461567
Correlated	AREL1	apoptosis resistant E3 ubiquitin protein ligase 1 [UniGene: NA]						unknown	+	981	5	944	2	30	91.26	0.51	20.02	2.62e-22	0.310154
Correlated	ARF3	ADP-ribosylation factor 3 [Source:HGNC Symbol;Acc:654]	12	q13.12	-1	49297286	49351334	ENSG00000134287	-	1054	12	1011	6	25	98.05	1.14	18.991	0	0.452326
Correlated	ARF6	ADP-ribosylation factor 6 [Source:HGNC Symbol;Acc:659]	14	q21.3	1	50359810	50361490	ENSG00000165527	+	1068	9	1025	8	26	99.35	0.84	16.155	4.41e-31	0.354774
Correlated	ARGLU1	arginine and glutamate rich 1 [Source:HGNC Symbol;Acc:25482]	13	q33.3	-1	107194021	107220512	ENSG00000134884	+	1066	8	1023	7	28	99.16	0.75	15.793	3.97e-27	0.330386
Correlated	ARHGAP11A	Rho GTPase activating protein 11A [Source:HGNC Symbol;Acc:15783]	15	q13.3	1	32907345	32932150	ENSG00000198826	+	948	6	914	5	23	88.19	0.63	17.831	1.98e-23	0.323944
Correlated	ARHGAP19	Rho GTPase activating protein 19 [Source:HGNC Symbol;Acc:23724]	10	q24.1	-1	98978996	99052413	ENSG00000213390	+	957	4	926	1	26	89.02	0.42	25.52	4.63e-23	0.319674
Correlated	ARHGAP20	Rho GTPase activating protein 20 [Source:HGNC Symbol;Acc:18357]	11	q23.1	-1	110447766	110583912	ENSG00000137727	-	1053	11	1009	9	24	97.95	1.04	16.547	9.88e-39	0.401121
Correlated	ARHGAP21	Rho GTPase activating protein 21 [Source:HGNC Symbol;Acc:23725]	10	p12.1	-1	24872538	25012597	ENSG00000107863	+	1063	7	1021	4	31	98.88	0.66	17.801	4.04e-27	0.330799
Correlated	ARHGAP22	Rho GTPase activating protein 22 [Source:HGNC Symbol;Acc:30320]	10	q11.22	-1	49654077	49864310	ENSG00000128805	-	944	7	909	6	22	87.81	0.74	17.528	1.22e-26	0.347698
Correlated	ARHGAP23	Rho GTPase activating protein 23 [Source:HGNC Symbol;Acc:29293]	HG745_PATCH	q12	1	36584721	36668629	ENSG00000260374	-	987	10	937	16	24	91.81	1.01	11.165	3.35e-23	0.315815
Correlated	ARHGAP23	Rho GTPase activating protein 23 [Source:HGNC Symbol;Acc:29293]	HG745_PATCH	q12	1	36584721	36668629	ENSG00000260374	+	987	7	947	6	27	91.81	0.71	15.631	1.12e-23	0.319276
Correlated	ARHGAP24	Rho GTPase activating protein 24 [Source:HGNC Symbol;Acc:25361]	4	q21.23	1	86396267	86923823	ENSG00000138639	-	1045	9	1000	7	29	97.21	0.86	15.469	9.35e-30	0.350478
Correlated	ARHGAP25	Rho GTPase activating protein 25 [Source:HGNC Symbol;Acc:28951]	2	p13.3	1	68906733	69053965	ENSG00000163219	-	966	7	931	4	24	89.86	0.72	19.83	2.74e-30	0.367975
Correlated	ARHGAP26	Rho GTPase activating protein 26 [Source:HGNC Symbol;Acc:17073]	5	q31.3	1	142149949	142608576	ENSG00000145819	-	1061	11	1011	13	26	98.7	1.04	13.143	2.7e-30	0.351151
Correlated	ARHGAP27	Rho GTPase activating protein 27 [Source:HGNC Symbol;Acc:31813]	17	q21.31	-1	43471275	43511787	ENSG00000159314	-	1039	9	993	8	29	96.65	0.87	14.475	9.79e-28	0.338618
Correlated	ARHGAP30	Rho GTPase activating protein 30 [Source:HGNC Symbol;Acc:27414]	1	q23.3	-1	161016736	161039760	ENSG00000186517	+	1037	8	995	6	28	96.47	0.77	16.46	2.32e-28	0.342988
Correlated	ARHGAP32	Rho GTPase activating protein 32 [Source:HGNC Symbol;Acc:17399]	11	q24.3	-1	128834955	129149219	ENSG00000134909	+	1071	8	1027	6	30	99.63	0.75	16.105	1.01e-27	0.333424
Correlated	ARHGAP42	Rho GTPase activating protein 42 [Source:HGNC Symbol;Acc:26545]	11	q22.1	1	100558384	100862668	ENSG00000165895	+	979	9	934	9	27	91.07	0.92	13.597	5.66e-26	0.336856
Correlated	ARHGAP8	Rho GTPase activating protein 8 [Source:HGNC Symbol;Acc:677]	22	q13.31	1	45098355	45258665	ENSG00000241484	+	991	9	952	5	25	92.19	0.91	18.737	2.15e-36	0.400212
Correlated	ARHGDIB	Rho GDP dissociation inhibitor (GDI) beta [Source:HGNC Symbol;Acc:679]	12	p12.3	-1	15094951	15114662	ENSG00000111348	-	968	6	935	4	23	90.05	0.62	20.028	2.18e-26	0.341639
Correlated	ARHGDIG	Rho GDP dissociation inhibitor (GDI) gamma [Source:HGNC Symbol;Acc:680]	16	p13.3	1	318726	333003	ENSG00000242173	-	939	8	908	2	21	87.35	0.85	25.903	2.8e-45	0.461243
Correlated	ARHGEF10	Rho guanine nucleotide exchange factor (GEF) 10 [Source:HGNC Symbol;Acc:14103]	LRG_234		1	5001	139659	LRG_234	-	971	9	927	13	22	90.33	0.93	12.814	2.47e-24	0.326651
Correlated	ARHGEF17	Rho guanine nucleotide exchange factor (GEF) 17 [Source:HGNC Symbol;Acc:21726]	11	q13.4	1	73019334	73080136	ENSG00000110237	-	954	6	921	4	23	88.74	0.63	19.738	5.23e-26	0.341479
Correlated	ARHGEF6	Rac/Cdc42 guanine nucleotide exchange factor (GEF) 6 [Source:HGNC Symbol;Acc:685]	X	q26.3	-1	135747706	135864247	ENSG00000129675	-	965	8	925	11	21	89.77	0.83	14.011	6.61e-24	0.324563
Correlated	ARHGEF7	Rho guanine nucleotide exchange factor (GEF) 7 [Source:HGNC Symbol;Acc:15607]	13	q34	1	111766906	111958084	ENSG00000102606	-	1061	12	1017	8	24	98.7	1.13	17.683	2.8e-45	0.433373
Correlated	ARHGEF9	Cdc42 guanine nucleotide exchange factor (GEF) 9 [Source:HGNC Symbol;Acc:14561]	HG1437_PATCH	q11.2	-1	62854437	63005016	ENSG00000268229	-	954	10	913	12	19	88.74	1.05	14.953	9.61e-32	0.379576
Correlated	ARL17A	ADP-ribosylation factor-like 17A [Source:HGNC Symbol;Acc:24096]	17	q21.31	-1	44594068	44657088	ENSG00000185829	-	1007	9	964	7	27	93.67	0.89	15.734	2.65e-30	0.360493
Correlated	ARL4A	ADP-ribosylation factor-like 4A [Source:HGNC Symbol;Acc:695]	7	p21.3	1	12726481	12730559	ENSG00000122644	+	927	8	896	2	21	86.23	0.86	25.572	8.41e-45	0.461131
Correlated	ARL6IP6	ADP-ribosylation-like factor 6 interacting protein 6 [Source:HGNC Symbol;Acc:24048]	2	q23.3	1	153574407	153617767	ENSG00000177917	+	1048	11	1007	3	27	97.49	1.05	21.669	0	0.466507
Correlated	ARMC8	armadillo repeat containing 8 [Source:HGNC Symbol;Acc:24999]	3	q22.3	1	137906109	138017231	ENSG00000114098	+	1071	13	1015	18	25	99.63	1.21	11.819	9.54e-32	0.358262
Correlated	ARMCX1	armadillo repeat containing, X-linked 1 [Source:HGNC Symbol;Acc:18073]	HG1439_PATCH	q22.1	1	100805518	100809687	ENSG00000269801	-	953	8	912	12	21	88.65	0.84	13.145	2.37e-22	0.315013
Correlated	ARNTL2	aryl hydrocarbon receptor nuclear translocator-like 2 [Source:HGNC Symbol;Acc:18984]	12	p11.23	1	27485787	27576241	ENSG00000029153	-	1057	10	1006	15	26	98.33	0.95	11.744	1.8e-24	0.314017
Correlated	ARPC1B	actin related protein 2/3 complex, subunit 1B, 41kDa [Source:HGNC Symbol;Acc:704]	7	q22.1	1	98971872	98992424	ENSG00000130429	-	970	6	935	4	25	90.23	0.62	18.774	1.01e-24	0.329611
Correlated	ARPC5L	actin related protein 2/3 complex, subunit 5-like [Source:HGNC Symbol;Acc:23366]	9	q33.3	1	127624409	127640003	ENSG00000136950	-	1071	8	1029	5	29	99.63	0.75	17.813	8.55e-31	0.352543
Correlated	ARPP19	cAMP-regulated phosphoprotein, 19kDa [Source:HGNC Symbol;Acc:16967]	15	q21.2	-1	52839242	52862080	ENSG00000128989	-	970	7	930	8	25	90.23	0.72	14.146	2.61e-21	0.304303
Correlated	ARPP21	cAMP-regulated phosphoprotein, 21kDa [Source:HGNC Symbol;Acc:16968]	3	p22.3	1	35680437	35835988	ENSG00000172995	-	1059	10	1016	7	26	98.51	0.94	17.304	5.02e-37	0.390657
Correlated	ARRB1	arrestin, beta 1 [Source:HGNC Symbol;Acc:711]	11	q13.4	-1	74975226	75062873	ENSG00000137486	-	1056	12	1006	15	23	98.23	1.14	13.41	1.13e-33	0.372178
Correlated	ARRDC2	arrestin domain containing 2 [Source:HGNC Symbol;Acc:25225]	19	p13.11	1	18111941	18124911	ENSG00000105643	+	1014	9	978	1	26	94.33	0.89	26.074	0	0.473156
Correlated	ARSD	arylsulfatase D [Source:HGNC Symbol;Acc:717]	X	p22.33	-1	2822011	2847392	ENSG00000006756	+	1030	9	982	12	27	95.81	0.87	12.262	3.3e-23	0.309196
Correlated	ART4	ADP-ribosyltransferase 4 (Dombrock blood group) [Source:HGNC Symbol;Acc:726]	12	p12.3	-1	14978503	14996429	ENSG00000111339	-	942	4	911	0	27	87.63	0.42	30.387	1.69e-27	0.354003
Correlated	ARV1	ARV1 homolog (S. cerevisiae) [Source:HGNC Symbol;Acc:29561]	1	q42.2	1	231114727	231136341	ENSG00000173409	+	1072	8	1027	7	30	99.72	0.75	15.046	8.44e-26	0.32076
Correlated	ARVCF	armadillo repeat gene deleted in velocardiofacial syndrome [Source:HGNC Symbol;Acc:728]	22	q11.21	-1	19957419	20004331	ENSG00000099889	+	924	5	891	3	25	85.95	0.54	19.25	2.16e-21	0.312429
Correlated	ASB10	ankyrin repeat and SOCS box containing 10 [Source:HGNC Symbol;Acc:17185]	7	q36.1	-1	150872785	150884919	ENSG00000146926	-	899	4	870	1	24	83.63	0.44	25.686	3.26e-23	0.331003
Correlated	ASB9	ankyrin repeat and SOCS box containing 9 [Source:HGNC Symbol;Acc:17184]	X	p22.2	-1	15253410	15288589	ENSG00000102048	-	959	8	922	8	21	89.21	0.83	16.534	1.85e-28	0.357321
Correlated	ASGR2	asialoglycoprotein receptor 2 [Source:HGNC Symbol;Acc:743]	17	p13.1	-1	7004641	7019019	ENSG00000161944	+	913	5	880	3	25	84.93	0.55	19.021	3.85e-21	0.312303
Correlated	ASMTL	acetylserotonin O-methyltransferase-like [Source:HGNC Symbol;Acc:751]	X	p22.33	-1	1522032	1572655	ENSG00000169093	-	968	12	933	5	18	90.05	1.24	22.776	0	0.520692
Correlated	ASPA	aspartoacylase [Source:HGNC Symbol;Acc:756]	17	p13.2	1	3375668	3406713	ENSG00000108381	-	1014	11	970	10	23	94.33	1.08	15.622	1.81e-36	0.396063
Correlated	ASPHD1	aspartate beta-hydroxylase domain containing 1 [Source:HGNC Symbol;Acc:27380]	16	p11.2	1	29911696	29931185	ENSG00000174939	-	950	8	913	8	21	88.37	0.84	16.379	3.45e-28	0.357184
Correlated	ASPHD2	aspartate beta-hydroxylase domain containing 2 [Source:HGNC Symbol;Acc:30437]	22	q12.1	1	26825239	26840981	ENSG00000128203	-	1051	10	1006	8	27	97.77	0.95	15.781	1.3e-33	0.372705
Correlated	ASPM	asp (abnormal spindle) homolog, microcephaly associated (Drosophila) [Source:HGNC Symbol;Acc:19048]	1	q31.3	-1	197053258	197115824	ENSG00000066279	+	1047	18	986	25	18	97.4	1.72	12.174	2.8e-45	0.436383
Correlated	ASXL2	additional sex combs like 2 (Drosophila) [Source:HGNC Symbol;Acc:23805]	2	p23.3	-1	25956622	26101385	ENSG00000143970	+	1070	7	1029	3	31	99.53	0.65	19.711	3.85e-30	0.348727
Correlated	ASXL3	additional sex combs like 3 (Drosophila) [Source:HGNC Symbol;Acc:29357]	18	q12.1	1	31158579	31331156	ENSG00000141431	-	1011	6	972	4	29	94.05	0.59	17.331	8.48e-23	0.309112
Correlated	ATAD2	ATPase family, AAA domain containing 2 [Source:HGNC Symbol;Acc:30123]	8	q24.13	-1	124332090	124428590	ENSG00000156802	+	1074	20	1016	20	18	99.91	1.86	14.132	0	0.494651
Correlated	ATAD2B	ATPase family, AAA domain containing 2B [Source:HGNC Symbol;Acc:29230]	2	p23.3	-1	23971534	24149984	ENSG00000119778	+	1067	12	1027	3	25	99.26	1.12	23.07	0	0.499491
Correlated	ATCAY	ataxia, cerebellar, Cayman type [Source:HGNC Symbol;Acc:779]	19	p13.3	1	3879862	3928077	ENSG00000167654	-	1017	7	978	3	29	94.6	0.69	19.775	2.96e-30	0.358412
Correlated	ATF1	activating transcription factor 1 [Source:HGNC Symbol;Acc:783]	12	q13.12	1	51157493	51214905	ENSG00000123268	+	947	6	910	5	26	88.09	0.63	16.142	3.5e-21	0.306978
Correlated	ATF4	activating transcription factor 4 [Source:HGNC Symbol;Acc:786]	22	q13.1	1	39915700	39918691	ENSG00000128272	+	954	6	918	5	25	88.74	0.63	16.786	4.88e-22	0.312457
Correlated	ATF7IP2	activating transcription factor 7 interacting protein 2 [Source:HGNC Symbol;Acc:20397]	16	p13.2	1	10420291	10577495	ENSG00000166669	-	965	6	929	5	25	89.77	0.62	16.979	2.71e-22	0.312602
Correlated	ATG13	autophagy related 13 [Source:HGNC Symbol;Acc:29091]	11	p11.2	1	46638826	46696368	ENSG00000175224	+	976	4	945	0	27	90.79	0.41	31.484	1.85e-28	0.354186
Correlated	ATG16L1	autophagy related 16-like 1 (S. cerevisiae) [Source:HGNC Symbol;Acc:21498]	2	q37.1	1	234118697	234204320	ENSG00000085978	+	1071	7	1032	1	31	99.63	0.65	24.661	5.54e-38	0.393692
Correlated	ATIC	5-aminoimidazole-4-carboxamide ribonucleotide formyltransferase/IMP cyclohydrolase [Source:HGNC Symbol;Acc:794]	2	q35	1	216176540	216214487	ENSG00000138363	+	957	4	925	1	27	89.02	0.42	24.697	2.47e-22	0.314218
Correlated	ATOH7	atonal homolog 7 (Drosophila) [Source:HGNC Symbol;Acc:13907]	10	q21.3	-1	69990386	69991871	ENSG00000179774	-	901	5	871	1	24	83.81	0.55	25.891	6.7e-29	0.371658
Correlated	ATOX1	antioxidant 1 copper chaperone [Source:HGNC Symbol;Acc:798]	5	q33.1	-1	151121877	151152093	ENSG00000177556	-	966	5	933	2	26	89.86	0.52	22.258	8.81e-25	0.330703
Correlated	ATP10A	ATPase, class V, type 10A [Source:HGNC Symbol;Acc:13542]	15	q12	-1	25922420	26110317	ENSG00000206190	-	956	9	918	7	22	88.93	0.94	17.347	1.49e-33	0.390425
Correlated	ATP11A	ATPase, class VI, type 11A [Source:HGNC Symbol;Acc:13552]	13	q34	1	113344643	113541482	ENSG00000068650	+	1054	12	1011	7	24	98.05	1.14	18.491	0	0.445661
Correlated	ATP11B	ATPase, class VI, type 11B [Source:HGNC Symbol;Acc:13553]	3	q26.33	1	182511288	182639423	ENSG00000058063	+	1068	14	1019	11	24	99.35	1.31	15.739	0	0.438296
Correlated	ATP13A2	ATPase type 13A2 [Source:HGNC Symbol;Acc:30213]	1	p36.13	-1	17312453	17338423	ENSG00000159363	-	938	7	905	3	23	87.26	0.75	21.887	1.52e-33	0.394106
Correlated	ATP1A2	ATPase, Na+/K+ transporting, alpha 2 polypeptide [Source:HGNC Symbol;Acc:800]	LRG_6		1	5001	32834	LRG_6	-	952	9	906	15	22	88.56	0.95	11.516	1.04e-21	0.310269
Correlated	ATP1A3	ATPase, Na+/K+ transporting, alpha 3 polypeptide [Source:HGNC Symbol;Acc:801]	19	q13.2	-1	42470734	42501649	ENSG00000105409	-	919	6	889	1	23	85.49	0.65	27.163	4.35e-36	0.413748
Correlated	ATP1B1	ATPase, Na+/K+ transporting, beta 1 polypeptide [Source:HGNC Symbol;Acc:804]	1	q24.2	1	169074935	169101960	ENSG00000143153	-	939	8	901	7	23	87.35	0.85	16.155	8.03e-28	0.356779
Correlated	ATP2A2	ATPase, Ca++ transporting, cardiac muscle, slow twitch 2 [Source:HGNC Symbol;Acc:812]	12	q24.11	1	110718561	110788898	ENSG00000174437	-	1061	12	1015	10	24	98.7	1.13	16.076	6.78e-41	0.411123
Correlated	ATP2B1	ATPase, Ca++ transporting, plasma membrane 1 [Source:HGNC Symbol;Acc:814]	12	q21.33	-1	89981828	90103077	ENSG00000070961	-	967	9	928	8	22	89.95	0.93	16.514	7.5e-32	0.37769
Correlated	ATP2B3	ATPase, Ca++ transporting, plasma membrane 3 [Source:HGNC Symbol;Acc:816]	HG1497_PATCH	q28	1	152725290	152790553	ENSG00000263148	-	1037	7	1002	0	28	96.47	0.68	29.629	1.4e-45	0.441093
Correlated	ATP4A	ATPase, H+/K+ exchanging, alpha polypeptide [Source:HGNC Symbol;Acc:819]	19	q13.12	-1	36040945	36054560	ENSG00000105675	-	889	6	859	2	22	82.7	0.67	23.812	1.46e-31	0.392019
Correlated	ATP5D	ATP synthase, H+ transporting, mitochondrial F1 complex, delta subunit [Source:HGNC Symbol;Acc:837]	19	p13.3	1	1241749	1244824	ENSG00000099624	+	948	4	918	1	25	88.19	0.42	26.152	1.28e-23	0.325341
Correlated	ATP6V0A2	ATPase, H+ transporting, lysosomal V0 subunit a2 [Source:HGNC Symbol;Acc:18481]	12	q24.31	1	124196865	124246302	ENSG00000185344	-	1061	8	1015	9	29	98.7	0.75	13.494	5.51e-23	0.303069
Correlated	ATP6V0A2	ATPase, H+ transporting, lysosomal V0 subunit a2 [Source:HGNC Symbol;Acc:18481]	12	q24.31	1	124196865	124246302	ENSG00000185344	+	1061	10	1014	10	27	98.7	0.94	14.338	2.44e-30	0.35142
Correlated	ATP6V0E1	ATPase, H+ transporting, lysosomal 9kDa, V0 subunit e1 [Source:HGNC Symbol;Acc:863]	5	q35.1	1	172410760	172462448	ENSG00000113732	+	1069	11	1027	7	24	99.44	1.03	18.665	5.75e-44	0.425328
Correlated	ATP6V1E1	ATPase, H+ transporting, lysosomal 31kDa, V1 subunit E1 [Source:HGNC Symbol;Acc:857]	22	q11.21	-1	18074902	18111584	ENSG00000131100	-	948	5	916	3	24	88.19	0.53	20.431	1.08e-22	0.318433
Correlated	ATP6V1G2	ATPase, H+ transporting, lysosomal 13kDa, V1 subunit G2 [Source:HGNC Symbol;Acc:862]	HSCHR6_MHC_SSTO	p21.33	-1	31502186	31504572	ENSG00000234920	-	928	7	897	2	22	86.33	0.75	24.889	2.87e-38	0.424599
Correlated	ATP6V1H	ATPase, H+ transporting, lysosomal 50/57kDa, V1 subunit H [Source:HGNC Symbol;Acc:18303]	8	q11.23	-1	54628117	54756118	ENSG00000047249	-	952	8	921	1	22	88.56	0.84	28.207	0	0.479455
Correlated	ATP7A	ATPase, Cu++ transporting, alpha polypeptide [Source:HGNC Symbol;Acc:869]	HG1426_PATCH	q21.1	1	77171651	77311349	ENSG00000269395	+	934	8	898	5	23	86.88	0.86	18.541	3.87e-32	0.386128
Correlated	ATP8A1	ATPase, aminophospholipid transporter (APLT), class I, type 8A, member 1 [Source:HGNC Symbol;Acc:13531]	4	p13	-1	42410390	42659122	ENSG00000124406	-	956	13	900	24	19	88.93	1.36	10.497	5.67e-28	0.35461
Correlated	ATP8A2	ATPase, aminophospholipid transporter, class I, type 8A, member 2 [Source:HGNC Symbol;Acc:13533]	13	q12.13	1	25946209	26599989	ENSG00000132932	-	1025	9	979	10	27	95.35	0.88	13.487	1.04e-25	0.327404
Correlated	ATP8B4	ATPase, class I, type 8B, member 4 [Source:HGNC Symbol;Acc:13536]	15	q21.2	-1	50150435	50475014	ENSG00000104043	-	937	8	900	7	22	87.16	0.85	16.658	1.02e-28	0.363218
Correlated	ATP9A	ATPase, class II, type 9A [Source:HGNC Symbol;Acc:13540]	20	q13.2	-1	50213053	50385173	ENSG00000054793	-	940	9	904	5	22	87.44	0.96	19.493	6.26e-38	0.41992
Correlated	ATXN1L	ataxin 1-like [Source:HGNC Symbol;Acc:33279]	16	q22.2	1	71879894	71891231	ENSG00000224470	-	1034	6	993	3	32	96.19	0.58	18.14	6.25e-24	0.313719
Correlated	AURKA	aurora kinase A [Source:HGNC Symbol;Acc:11393]	20	q13.2	-1	54944445	54967393	ENSG00000087586	+	976	14	931	14	17	90.79	1.43	15.742	0	0.458875
Correlated	AVL9	AVL9 homolog (S. cerevisiase) [Source:HGNC Symbol;Acc:28994]	7	p14.3	1	32535038	33078516	ENSG00000105778	-	1038	6	999	4	29	96.56	0.58	17.794	2.09e-23	0.30942
Correlated	AXL	AXL receptor tyrosine kinase [Source:HGNC Symbol;Acc:905]	19	q13.2	1	41725108	41767671	ENSG00000167601	-	953	9	906	16	22	88.65	0.94	11.067	8.5e-21	0.302981
Correlated	AZI2	5-azacytidine induced 2 [Source:HGNC Symbol;Acc:24002]	3	p24.1	-1	28356494	28390618	ENSG00000163512	-	1068	10	1023	8	27	99.35	0.94	16.036	3.6e-34	0.372946
Correlated	B3GALT2	UDP-Gal:betaGlcNAc beta 1,3-galactosyltransferase, polypeptide 2 [Source:HGNC Symbol;Acc:917]	1	q31.2	-1	193148175	193155784	ENSG00000162630	-	952	8	916	7	21	88.56	0.84	17.508	3.2e-30	0.370228
Correlated	B3GAT1	beta-1,3-glucuronyltransferase 1 (glucuronosyltransferase P) [Source:HGNC Symbol;Acc:921]	11	q25	-1	134248398	134281812	ENSG00000109956	-	962	9	928	5	20	89.49	0.94	21.325	1.43e-41	0.435463
Correlated	B3GNT1	UDP-GlcNAc:betaGal beta-1,3-N-acetylglucosaminyltransferase 1 [Source:HGNC Symbol;Acc:15685]	11	q13.2	-1	66112843	66115163	ENSG00000174684	-	1066	9	1023	8	26	99.16	0.84	16.124	5.06e-31	0.354747
Correlated	B3GNT3	UDP-GlcNAc:betaGal beta-1,3-N-acetylglucosaminyltransferase 3 [Source:HGNC Symbol;Acc:13528]	19	p13.11	1	17905637	17923891	ENSG00000179913	+	944	5	911	3	25	87.81	0.53	19.667	7.53e-22	0.312652
Correlated	B3GNT7	UDP-GlcNAc:betaGal beta-1,3-N-acetylglucosaminyltransferase 7 [Source:HGNC Symbol;Acc:18811]	2	q37.1	1	232260254	232265875	ENSG00000156966	-	1042	7	1001	5	29	96.93	0.67	16.884	1.19e-25	0.324333
Correlated	B4GALNT1	beta-1,4-N-acetyl-galactosaminyl transferase 1 [Source:HGNC Symbol;Acc:4117]	12	q13.3	-1	58017193	58027138	ENSG00000135454	-	948	9	916	1	22	88.19	0.95	27.523	0	0.503513
Correlated	B4GALT3	UDP-Gal:betaGlcNAc beta 1,4- galactosyltransferase, polypeptide 3 [Source:HGNC Symbol;Acc:926]	1	q23.3	-1	161141100	161147287	ENSG00000158850	+	1062	6	1024	2	30	98.79	0.56	22.125	2.75e-29	0.344746
Correlated	B4GALT4	UDP-Gal:betaGlcNAc beta 1,4- galactosyltransferase, polypeptide 4 [Source:HGNC Symbol;Acc:927]	3	q13.32	-1	118930579	118959950	ENSG00000121578	+	968	6	936	3	23	90.05	0.62	22.253	2.13e-29	0.361823
Correlated	B4GALT6	UDP-Gal:betaGlcNAc beta 1,4- galactosyltransferase, polypeptide 6 [Source:HGNC Symbol;Acc:929]	18	q12.1	-1	29202210	29265799	ENSG00000118276	-	1052	11	1005	9	27	97.86	1.05	15.226	1.69e-35	0.38339
Correlated	BAALC	brain and acute leukemia, cytoplasmic [Source:HGNC Symbol;Acc:14333]	8	q22.3	1	104152938	104242533	ENSG00000164929	-	1062	11	1018	7	26	98.79	1.04	17.541	3.19e-41	0.412643
Correlated	BAAT	bile acid CoA: amino acid N-acyltransferase (glycine N-choloyltransferase) [Source:HGNC Symbol;Acc:932]	9	q31.1	-1	104122699	104145801	ENSG00000136881	+	943	5	914	1	23	87.72	0.53	28.065	2.75e-31	0.37887
Correlated	BACE1	beta-site APP-cleaving enzyme 1 [Source:HGNC Symbol;Acc:933]	11	q23.3	-1	117156402	117186975	ENSG00000186318	-	1070	11	1020	12	27	99.53	1.03	13.467	4.21e-31	0.354567
Correlated	BAI2	brain-specific angiogenesis inhibitor 2 [Source:HGNC Symbol;Acc:944]	1	p35.2	-1	32192718	32230494	ENSG00000121753	-	964	6	933	0	25	89.67	0.62	31.097	2.05e-41	0.434163
Correlated	BAI3	brain-specific angiogenesis inhibitor 3 [Source:HGNC Symbol;Acc:945]	6	q12	1	69345259	70099403	ENSG00000135298	-	945	7	911	3	24	87.91	0.74	21.339	1.07e-32	0.387369
Correlated	BAIAP2	BAI1-associated protein 2 [Source:HGNC Symbol;Acc:947]	17	q25.3	1	79008948	79091232	ENSG00000175866	-	969	10	929	9	21	90.14	1.03	16.452	3.99e-35	0.397254
Correlated	BAK1	BCL2-antagonist/killer 1 [Source:HGNC Symbol;Acc:949]	6	p21.31	-1	33540329	33548019	ENSG00000030110	-	967	5	933	3	26	89.95	0.52	19.496	1.17e-21	0.307437
Correlated	BAP1	BRCA1 associated protein-1 (ubiquitin carboxy-terminal hydrolase) [Source:HGNC Symbol;Acc:950]	3	p21.1	-1	52435029	52444366	ENSG00000163930	+	969	3	940	0	26	90.14	0.31	33.414	5.27e-23	0.317276
Correlated	BARD1	BRCA1 associated RING domain 1 [Source:HGNC Symbol;Acc:952]	2	q35	-1	215590370	215674428	ENSG00000138376	+	1072	15	1025	10	22	99.72	1.4	17.384	0	0.478676
Correlated	BATF3	basic leucine zipper transcription factor, ATF-like 3 [Source:HGNC Symbol;Acc:28915]	1	q32.3	-1	212859760	212873327	ENSG00000123685	-	944	5	914	2	23	87.81	0.53	24.082	8.49e-27	0.3488
Correlated	BAX	BCL2-associated X protein [Source:HGNC Symbol;Acc:959]	19	q13.33	1	49458072	49465055	ENSG00000087088	+	950	6	917	4	23	88.37	0.63	19.655	6.72e-26	0.341432
Correlated	BAZ1A	bromodomain adjacent to zinc finger domain, 1A [Source:HGNC Symbol;Acc:960]	14	q13.2	-1	35221937	35344853	ENSG00000198604	+	963	9	920	13	21	89.58	0.93	13.132	5.59e-25	0.332631
Correlated	BAZ2A	bromodomain adjacent to zinc finger domain, 2A [Source:HGNC Symbol;Acc:962]	12	q13.3	-1	56989380	57030600	ENSG00000076108	-	960	5	928	3	24	89.3	0.52	20.69	5.61e-23	0.318558
Correlated	BBS7	Bardet-Biedl syndrome 7 [Source:HGNC Symbol;Acc:18758]	4	q27	-1	122745595	122791652	ENSG00000138686	-	1073	5	1035	1	32	99.81	0.47	24.167	5.66e-27	0.328305
Correlated	BCAN	brevican [Source:HGNC Symbol;Acc:23059]	1	q23.1	1	156611182	156629324	ENSG00000132692	+	1069	11	1019	12	27	99.44	1.03	13.454	4.51e-31	0.35455
Correlated	BCAP29	B-cell receptor-associated protein 29 [Source:HGNC Symbol;Acc:24131]	7	q22.3	1	107220422	107269615	ENSG00000075790	+	1067	9	1019	10	29	99.26	0.84	13.301	2.57e-25	0.318277
Correlated	BCAS4	breast carcinoma amplified sequence 4 [Source:HGNC Symbol;Acc:14367]	20	q13.13	1	49411431	49493714	ENSG00000124243	-	1048	10	1008	5	25	97.49	0.95	19.962	5.13e-43	0.424724
Correlated	BCAT1	branched chain amino-acid transaminase 1, cytosolic [Source:HGNC Symbol;Acc:976]	12	p12.1	-1	24964295	25102393	ENSG00000060982	+	1061	14	992	33	22	98.7	1.32	8.779	1.56e-24	0.313863
Correlated	BCCIP	BRCA2 and CDKN1A interacting protein [Source:HGNC Symbol;Acc:978]	10	q26.2	1	127512115	127542264	ENSG00000107949	+	1047	11	1004	7	25	97.4	1.05	17.773	8.43e-42	0.418619
Correlated	BCHE	butyrylcholinesterase [Source:HGNC Symbol;Acc:983]	3	q26.1	-1	165490692	165555260	ENSG00000114200	+	938	7	907	2	22	87.26	0.75	25.157	1.12e-38	0.424693
Correlated	BCL11A	B-cell CLL/lymphoma 11A (zinc finger protein) [Source:HGNC Symbol;Acc:13221]	2	p16.1	-1	60678302	60780702	ENSG00000119866	-	1054	12	995	23	24	98.05	1.14	10.038	1.51e-24	0.314993
Correlated	BCL2	B-cell CLL/lymphoma 2 [Source:HGNC Symbol;Acc:990]	18	q21.33	-1	60790579	60987361	ENSG00000171791	-	939	9	895	13	22	87.35	0.96	12.391	1.68e-23	0.326021
Correlated	BCL2L11	BCL2-like 11 (apoptosis facilitator) [Source:HGNC Symbol;Acc:994]	2	q13	1	111876955	111926024	ENSG00000153094	+	1057	12	1004	18	23	98.33	1.14	12.08	4.5e-30	0.350448
Correlated	BCL2L12	BCL2-like 12 (proline rich) [Source:HGNC Symbol;Acc:13787]	19	q13.33	1	50168823	50177173	ENSG00000126453	+	1037	8	999	3	27	96.47	0.77	21.548	1.54e-37	0.397643
Correlated	BCL2L2	BCL2-like 2 [Source:HGNC Symbol;Acc:995]	14	q11.2	1	23767999	23780968	ENSG00000129473	-	974	8	939	3	24	90.6	0.82	22.136	1.32e-38	0.416354
Correlated	BCL6B	B-cell CLL/lymphoma 6, member B [Source:HGNC Symbol;Acc:1002]	17	p13.1	1	6926339	6933609	ENSG00000161940	-	1066	7	1024	4	31	99.16	0.66	17.852	3.38e-27	0.330833
Correlated	BCRP3	breakpoint cluster region pseudogene 3 [Source:HGNC Symbol;Acc:1016]	22	q11.23	1	25028882	25046799	ENSG00000215481	-	839	4	810	1	24	78.05	0.48	23.971	1.04e-21	0.33049
Correlated	BDKRB2	bradykinin receptor B2 [Source:HGNC Symbol;Acc:1030]	14	q32.2	1	96671016	96710666	ENSG00000168398	-	961	6	928	3	24	89.4	0.62	21.356	3.28e-28	0.355281
Correlated	BDNF	brain-derived neurotrophic factor [Source:HGNC Symbol;Acc:1033]	11	p14.1	-1	27676440	27743605	ENSG00000176697	-	1047	10	997	12	28	97.4	0.96	12.524	2.93e-26	0.327639
Correlated	BEGAIN	brain-enriched guanylate kinase-associated [Source:HGNC Symbol;Acc:24163]	14	q32.2	-1	101003486	101053750	ENSG00000183092	-	945	5	915	1	24	87.91	0.53	27.155	2.77e-30	0.372007
Correlated	BEND4	BEN domain containing 4 [Source:HGNC Symbol;Acc:23815]	4	p13	-1	42112955	42154895	ENSG00000188848	-	1000	15	953	11	21	93.02	1.5	16.026	0	0.474409
Correlated	BEND6	BEN domain containing 6 [Source:HGNC Symbol;Acc:20871]	6	p12.1	1	56819773	56892140	ENSG00000151917	-	1030	6	989	3	32	95.81	0.58	18.07	7.73e-24	0.313677
Correlated	BEST1	bestrophin 1 [Source:HGNC Symbol;Acc:12703]	11	q12.3	1	61717293	61732987	ENSG00000167995	-	956	5	924	3	24	88.93	0.52	20.603	6.97e-23	0.318517
Correlated	BEX2	brain expressed X-linked 2 [Source:HGNC Symbol;Acc:30933]	X	q22.1	-1	102564274	102565974	ENSG00000133134	-	974	10	924	15	25	90.6	1.03	11.131	3.84e-23	0.317474
Correlated	BEX5	brain expressed, X-linked 5 [Source:HGNC Symbol;Acc:27990]	HG1440_PATCH	q22.1	-1	101408680	101411029	ENSG00000269503	-	1004	11	956	13	24	93.4	1.1	13.148	2.41e-30	0.36129
Correlated	BFSP1	beaded filament structural protein 1, filensin [Source:HGNC Symbol;Acc:1040]	20	p12.1	-1	17474550	17549865	ENSG00000125864	-	946	5	914	2	25	88	0.53	22.524	4.45e-25	0.336317
Correlated	BHLHE22	basic helix-loop-helix family, member e22 [Source:HGNC Symbol;Acc:11963]	8	q12.3	1	65492814	65496181	ENSG00000180828	-	1002	14	961	6	21	93.21	1.4	20.04	0	0.516948
Correlated	BHMT2	betaine--homocysteine S-methyltransferase 2 [Source:HGNC Symbol;Acc:1048]	5	q14.1	1	78365540	78385289	ENSG00000132840	-	1034	12	995	3	24	96.19	1.16	22.978	0	0.50644
Correlated	BICC1	bicaudal C homolog 1 (Drosophila) [Source:HGNC Symbol;Acc:19351]	10	q21.1	1	60272900	60591195	ENSG00000122870	-	889	8	851	9	21	82.7	0.9	14.426	1.02e-24	0.34424
Correlated	BICD2	bicaudal D homolog 2 (Drosophila) [Source:HGNC Symbol;Acc:17208]	9	q22.31	-1	95473645	95527094	ENSG00000185963	+	961	7	925	7	22	89.4	0.73	16.569	4.12e-25	0.333918
Correlated	BIK	BCL2-interacting killer (apoptosis-inducing) [Source:HGNC Symbol;Acc:1051]	22	q13.2	1	43506754	43525718	ENSG00000100290	+	947	10	904	12	21	88.09	1.06	13.886	2.31e-29	0.365577
Correlated	BIN1	bridging integrator 1 [Source:HGNC Symbol;Acc:1052]	2	q14.3	-1	127805603	127864931	ENSG00000136717	-	948	15	910	9	14	88.19	1.58	20.431	0	0.556297
Correlated	BIN2	bridging integrator 2 [Source:HGNC Symbol;Acc:1053]	12	q13.13	-1	51674822	51718452	ENSG00000110934	+	940	4	911	1	24	87.44	0.43	26.857	3.05e-24	0.331315
Correlated	BIRC3	baculoviral IAP repeat containing 3 [Source:HGNC Symbol;Acc:591]	11	q22.2	1	102188215	102210134	ENSG00000023445	-	1067	10	1014	15	28	99.26	0.94	11.232	2.57e-23	0.304553
Correlated	BIRC5	baculoviral IAP repeat containing 5 [Source:HGNC Symbol;Acc:593]	17	q25.3	1	76210267	76221717	ENSG00000089685	+	950	15	906	15	14	88.37	1.58	16.379	0	0.492802
Correlated	BLOC1S5	EEF1E1-MUTED readthrough///biogenesis of lysosomal organelles complex-1, subunit 5, muted [UniGene: Muted homolog (mouse)]						unknown	+	1072	6	1032	2	32	99.72	0.56	21.158	5.27e-28	0.335082
Correlated	BLVRA	biliverdin reductase A [Source:HGNC Symbol;Acc:1062]	7	p13	1	43798279	43846939	ENSG00000106605	+	1048	10	999	14	25	97.49	0.95	12.476	4.01e-26	0.326575
Correlated	BMPR2	bone morphogenetic protein receptor, type II (serine/threonine kinase) [Source:HGNC Symbol;Acc:1078]	2	q33.1	1	203241659	203432474	ENSG00000204217	-	1051	7	1007	6	31	97.77	0.67	14.893	1.64e-22	0.301125
Correlated	BMX	BMX non-receptor tyrosine kinase [Source:HGNC Symbol;Acc:1079]	X	p22.2	1	15482369	15574652	ENSG00000102010	-	942	4	912	2	24	87.63	0.42	22.429	3.07e-20	0.300287
Correlated	BOC	BOC cell adhesion associated, oncogene regulated [Source:HGNC Symbol;Acc:17173]	3	q13.2	1	112929850	113006303	ENSG00000144857	+	1051	9	1004	9	29	97.77	0.86	13.829	2.09e-26	0.327993
Correlated	BORA	bora, aurora kinase A activator [Source:HGNC Symbol;Acc:24724]	13	q22.1	1	73302061	73330336	ENSG00000136122	+	958	6	926	3	23	89.12	0.63	22.023	4.27e-29	0.361721
Correlated	BPNT1	3'(2'), 5'-bisphosphate nucleotidase 1 [Source:HGNC Symbol;Acc:1096]	1	q41	-1	220230824	220263804	ENSG00000162813	+	1049	6	1010	3	30	97.58	0.57	19.426	1.24e-25	0.323132
Correlated	BRAP	BRCA1 associated protein [Source:HGNC Symbol;Acc:1099]	12	q24.12	-1	112079950	112123790	ENSG00000089234	+	971	6	937	5	23	90.33	0.62	18.263	5.34e-24	0.324234
Correlated	BRCA1	breast cancer 1, early onset [Source:HGNC Symbol;Acc:1100]	LRG_292		1	92501	173689	LRG_292	+	956	7	919	7	23	88.93	0.73	15.933	4e-24	0.32768
Correlated	BRCA2	breast cancer 2, early onset [Source:HGNC Symbol;Acc:1101]	LRG_293		1	5001	89193	LRG_293	+	961	9	927	3	22	89.4	0.94	23.25	1.4e-45	0.456801
Correlated	BRD2	bromodomain containing 2 [Source:HGNC Symbol;Acc:1103]	HSCHR6_MHC_MCF	p21.32	1	32969905	32980956	ENSG00000236227	-	948	5	917	2	24	88.19	0.53	23.35	5.46e-26	0.342427
Correlated	BRE-AS1	BRE antisense RNA 1 [UniGene: Uncharacterized LOC100302650]						unknown	-	817	6	785	5	21	76	0.73	16.505	1.05e-21	0.334865
Correlated	BRIP1	BRCA1 interacting protein C-terminal helicase 1 [Source:HGNC Symbol;Acc:20473]	17	q23.2	-1	59758627	59940882	ENSG00000136492	+	1040	12	988	14	26	96.74	1.15	12.632	1.32e-31	0.362714
Correlated	BRSK1	BR serine/threonine kinase 1 [Source:HGNC Symbol;Acc:18994]	19	q13.42	1	55793440	55823901	ENSG00000160469	-	923	10	890	3	20	85.86	1.08	23.667	0	0.496562
Correlated	BRSK2	BR serine/threonine kinase 2 [Source:HGNC Symbol;Acc:11405]	11	p15.5	1	1411129	1483919	ENSG00000174672	-	1062	9	1021	3	29	98.79	0.85	20.961	6.39e-41	0.411064
Correlated	BSDC1	BSD domain containing 1 [Source:HGNC Symbol;Acc:25501]	1	p35.1	-1	32830704	32860332	ENSG00000160058	+	964	5	930	3	26	89.67	0.52	19.435	1.37e-21	0.307405
Correlated	BSG	basigin (Ok blood group) [Source:HGNC Symbol;Acc:1116]	19	p13.3	1	571297	583493	ENSG00000172270	+	957	5	924	2	26	89.02	0.52	22.051	1.49e-24	0.33062
Correlated	BSN	bassoon presynaptic cytomatrix protein [Source:HGNC Symbol;Acc:1117]	3	p21.31	1	49591922	49708978	ENSG00000164061	-	896	5	865	2	24	83.35	0.56	22.069	1.38e-24	0.341925
Correlated	BSPRY	B-box and SPRY domain containing [Source:HGNC Symbol;Acc:18232]	9	q32	1	116111821	116133513	ENSG00000119411	-	1039	7	999	5	28	96.65	0.67	17.317	2.54e-26	0.329309
Correlated	BTBD10	BTB (POZ) domain containing 10 [Source:HGNC Symbol;Acc:21445]	11	p15.2	-1	13409548	13484844	ENSG00000148925	-	1042	7	1002	5	28	96.93	0.67	17.367	2.13e-26	0.329345
Correlated	BTBD9	BTB (POZ) domain containing 9 [Source:HGNC Symbol;Acc:21228]	6	p21.2	-1	38136227	38607924	ENSG00000183826	-	1044	9	1001	8	26	97.12	0.86	15.792	2.29e-30	0.35444
Correlated	BTD	biotinidase [Source:HGNC Symbol;Acc:1122]	3	p25.1	1	15642848	15687329	ENSG00000169814	-	969	9	929	11	20	90.14	0.93	15.036	7.91e-29	0.357904
Correlated	BTF3	basic transcription factor 3 [Source:HGNC Symbol;Acc:1125]	5	q13.2	1	72794233	72801460	ENSG00000145741	+	1071	5	1033	1	32	99.63	0.47	24.122	6.34e-27	0.328292
Correlated	BTG3	BTG family, member 3 [Source:HGNC Symbol;Acc:1132]	21	q21.1	-1	18965971	18985265	ENSG00000154640	+	971	12	912	30	17	90.33	1.24	9.5665	2.31e-23	0.319591
Correlated	BTK	Bruton agammaglobulinemia tyrosine kinase [Source:HGNC Symbol;Acc:1133]	LRG_128		1	5001	41778	LRG_128	-	930	8	894	5	23	86.51	0.86	18.462	5.33e-32	0.386074
Correlated	BTN3A1	butyrophilin, subfamily 3, member A1 [Source:HGNC Symbol;Acc:1138]	6	p22.2	1	26402465	26415444	ENSG00000026950	-	948	5	914	3	26	88.19	0.53	19.113	3.09e-21	0.307231
Correlated	BTN3A2	butyrophilin, subfamily 3, member A2 [Source:HGNC Symbol;Acc:1139]	6	p22.2	1	26365387	26378546	ENSG00000186470	-	939	8	902	7	22	87.35	0.85	16.693	8.86e-29	0.363248
Correlated	BTN3A3	butyrophilin, subfamily 3, member A3 [Source:HGNC Symbol;Acc:1140]	6	p22.2	1	26440700	26453643	ENSG00000111801	-	969	9	930	8	22	90.14	0.93	16.548	6.43e-32	0.377721
Correlated	BTRC	beta-transducin repeat containing E3 ubiquitin protein ligase [Source:HGNC Symbol;Acc:1144]	10	q24.32	1	103113820	103317078	ENSG00000166167	+	1066	6	1027	4	29	99.16	0.56	18.274	4.87e-24	0.309723
Correlated	BUB1	BUB1 mitotic checkpoint serine/threonine kinase [Source:HGNC Symbol;Acc:1148]	2	q13	-1	111395275	111435691	ENSG00000169679	+	949	15	899	21	14	88.28	1.58	13.635	7.45e-43	0.445449
Correlated	BUB1B	BUB1 mitotic checkpoint serine/threonine kinase B [Source:HGNC Symbol;Acc:1149]	15	q15.1	1	40453224	40513337	ENSG00000156970	+	950	10	907	14	19	88.37	1.05	13.649	8.21e-29	0.36136
Correlated	BUB3	BUB3 mitotic checkpoint protein [Source:HGNC Symbol;Acc:1151]	10	q26.13	1	124913793	124924886	ENSG00000154473	+	1061	9	1021	4	27	98.7	0.85	20.404	9.7e-40	0.405012
Correlated	BZRAP1	benzodiazapine receptor (peripheral) associated protein 1 [Source:HGNC Symbol;Acc:16831]	17	q22	-1	56378592	56406152	ENSG00000005379	-	954	5	923	2	24	88.74	0.52	23.498	3.76e-26	0.342482
Correlated	C10ORF114	chromosome 10 open reading frame 114 [UniGene: NA]						unknown	+	886	4	856	1	25	82.42	0.45	24.441	4.06e-22	0.324854
Correlated	C10ORF128	NA	NA	NA	NA	NA	NA	NA	-	964	10	926	5	23	89.67	1.04	19.475	5.46e-42	0.437294
Correlated	C10ORF2	NA	NA	NA	NA	NA	NA	NA	+	950	5	918	3	24	88.37	0.53	20.474	9.66e-23	0.318454
Correlated	C10ORF35	NA	NA	NA	NA	NA	NA	NA	-	1034	7	997	2	28	96.19	0.68	22.978	2.77e-35	0.385473
Correlated	C10ORF85	NA	NA	NA	NA	NA	NA	NA	+	935	4	903	0	28	86.98	0.43	29.219	1.8e-26	0.348196
Correlated	C10ORF90	NA	NA	NA	NA	NA	NA	NA	-	925	5	891	3	26	86.05	0.54	18.649	9.99e-21	0.306971
Correlated	C11ORF48	NA	NA	NA	NA	NA	NA	NA	+	951	4	920	1	26	88.47	0.42	25.36	6.4e-23	0.31963
Correlated	C11ORF63	NA	NA	NA	NA	NA	NA	NA	-	951	6	916	6	23	88.47	0.63	16.397	1.74e-21	0.308685
Correlated	C11ORF87	NA	NA	NA	NA	NA	NA	NA	-	965	8	922	7	28	89.77	0.83	14.296	1.66e-24	0.328895
Correlated	C12ORF39	NA	NA	NA	NA	NA	NA	NA	-	1013	9	970	7	27	94.23	0.89	15.828	1.73e-30	0.360581
Correlated	C12ORF49	NA	NA	NA	NA	NA	NA	NA	+	1065	6	1025	4	30	99.07	0.56	17.75	2.42e-23	0.305023
Correlated	C14ORF1	NA	NA	NA	NA	NA	NA	NA	-	965	8	924	10	23	89.77	0.83	13.835	1.32e-23	0.322381
Correlated	C15ORF27	NA	NA	NA	NA	NA	NA	NA	-	922	6	890	3	23	85.77	0.65	21.195	5.22e-28	0.361336
Correlated	C16ORF13	NA	NA	NA	NA	NA	NA	NA	+	1037	7	1001	1	28	96.47	0.68	25.925	6.13e-40	0.410745
Correlated	C16ORF89	NA	NA	NA	NA	NA	NA	NA	-	1003	11	963	6	23	93.3	1.1	19.088	4.2e-45	0.444897
Correlated	C17ORF49	NA	NA	NA	NA	NA	NA	NA	-	1027	6	991	1	29	95.53	0.58	25.151	2.1e-33	0.375805
Correlated	C17ORF51	NA	NA	NA	NA	NA	NA	NA	-	1019	9	975	9	26	94.79	0.88	14.557	7.03e-28	0.342866
Correlated	C17ORF75	NA	NA	NA	NA	NA	NA	NA	+	963	5	932	2	24	89.58	0.52	23.719	2.15e-26	0.342562
Correlated	C17ORF82	NA	NA	NA	NA	NA	NA	NA	-	857	4	830	1	22	79.72	0.47	26.369	8.01e-24	0.343763
Correlated	C18ORF54	NA	NA	NA	NA	NA	NA	NA	+	1034	8	989	7	30	96.19	0.77	14.512	7.27e-25	0.320221
Correlated	C19ORF12	NA	NA	NA	NA	NA	NA	NA	-	1059	13	1017	7	22	98.51	1.23	19.667	0	0.478817
Correlated	C19ORF33	NA	NA	NA	NA	NA	NA	NA	+	1040	9	997	8	26	96.74	0.87	15.731	3.01e-30	0.354383
Correlated	C19ORF47	NA	NA	NA	NA	NA	NA	NA	-	930	5	896	1	28	86.51	0.54	23.485	3.04e-26	0.347528
Correlated	C19ORF48	NA	NA	NA	NA	NA	NA	NA	+	1039	8	1000	4	27	96.65	0.77	19.79	2.31e-34	0.379237
Correlated	C19ORF66	NA	NA	NA	NA	NA	NA	NA	-	966	8	934	3	21	89.86	0.83	24.226	2.67e-42	0.438523
Correlated	C19ORF77	NA	NA	NA	NA	NA	NA	NA	-	1007	8	969	2	28	93.67	0.79	22.378	4.18e-39	0.412246
Correlated	C1D	C1D nuclear receptor corepressor [Source:HGNC Symbol;Acc:29911]	2	p14	-1	68268262	68338080	ENSG00000197223	+	1046	6	1006	4	30	97.3	0.57	17.433	6.31e-23	0.304815
Correlated	C1GALT1	core 1 synthase, glycoprotein-N-acetylgalactosamine 3-beta-galactosyltransferase, 1 [Source:HGNC Symbol;Acc:24337]	7	p22.1	1	7196565	7288251	ENSG00000106392	+	1059	8	1014	8	29	98.51	0.76	14.311	1.82e-24	0.313688
Correlated	C1ORF106	NA	NA	NA	NA	NA	NA	NA	+	940	10	905	7	18	87.44	1.06	19.748	1.57e-42	0.445818
Correlated	C1ORF112	NA	NA	NA	NA	NA	NA	NA	+	944	9	912	3	20	87.81	0.95	24.414	0	0.47298
Correlated	C1ORF115	NA	NA	NA	NA	NA	NA	NA	-	1066	9	1019	9	29	99.16	0.84	14.026	8.52e-27	0.328226
Correlated	C1ORF162	NA	NA	NA	NA	NA	NA	NA	+	1019	10	970	13	26	94.79	0.98	12.307	8.99e-26	0.328812
Correlated	C1ORF204	NA	NA	NA	NA	NA	NA	NA	-	881	5	851	1	24	81.95	0.57	25.316	2.85e-28	0.371488
Correlated	C1ORF216	NA	NA	NA	NA	NA	NA	NA	-	963	9	931	3	20	89.58	0.93	24.905	0	0.473171
Correlated	C1ORF56	NA	NA	NA	NA	NA	NA	NA	-	1056	6	1017	4	29	98.23	0.57	18.103	8.19e-24	0.309616
Correlated	C1ORF63	NA	NA	NA	NA	NA	NA	NA	+	940	9	893	17	21	87.44	0.96	10.846	2.36e-20	0.301523
Correlated	C1ORF95	NA	NA	NA	NA	NA	NA	NA	-	1038	10	999	2	27	96.56	0.96	23.378	0	0.465296
Correlated	C1QL1	complement component 1, q subcomponent-like 1 [Source:HGNC Symbol;Acc:24182]	17	q21.31	-1	43037061	43045439	ENSG00000131094	+	937	7	903	5	22	87.16	0.75	18.848	9.96e-29	0.363294
Correlated	C1QTNF4	C1q and tumor necrosis factor related protein 4 [Source:HGNC Symbol;Acc:14346]	11	p11.2	-1	47611216	47616211	ENSG00000172247	-	1006	6	967	3	30	93.58	0.6	18.63	1.38e-24	0.322688
Correlated	C1QTNF7	C1q and tumor necrosis factor related protein 7 [Source:HGNC Symbol;Acc:14342]	4	p15.32	1	15341442	15447790	ENSG00000163145	-	1016	8	976	5	27	94.51	0.79	17.864	6.65e-31	0.362639
Correlated	C1QTNF9	C1q and tumor necrosis factor related protein 9 [Source:HGNC Symbol;Acc:28732]	13	q12.12	1	24881304	24896673	ENSG00000240654	-	901	4	871	1	25	83.81	0.44	24.855	1.76e-22	0.324978
Correlated	C2	complement component 2 [Source:HGNC Symbol;Acc:1248]	LRG_26		1	5001	23184	LRG_26	+	942	7	909	4	22	87.63	0.74	20.671	1.34e-31	0.381073
Correlated	C20ORF112	NA	NA	NA	NA	NA	NA	NA	-	1072	13	1022	12	25	99.72	1.21	14.669	4.06e-40	0.40493
Correlated	C20ORF194	NA	NA	NA	NA	NA	NA	NA	-	981	6	942	4	29	91.26	0.61	16.817	4.03e-22	0.30875
Correlated	C20ORF195	NA	NA	NA	NA	NA	NA	NA	+	914	4	884	1	25	85.02	0.44	25.214	8.53e-23	0.325082
Correlated	C21ORF2	NA	NA	NA	NA	NA	NA	NA	-	1038	10	988	15	25	96.56	0.96	11.863	9.57e-25	0.318781
Correlated	C21ORF58	NA	NA	NA	NA	NA	NA	NA	+	1005	12	961	8	24	93.49	1.19	16.75	8.42e-43	0.43258
Correlated	C2CD2L	C2CD2-like [Source:HGNC Symbol;Acc:29000]	11	q23.3	1	118972908	118989252	ENSG00000172375	-	967	8	934	4	21	89.95	0.83	22.23	1.04e-38	0.418441
Correlated	C2ORF40	NA	NA	NA	NA	NA	NA	NA	-	1005	9	961	9	26	93.49	0.9	14.357	1.74e-27	0.342641
Correlated	C2ORF44	NA	NA	NA	NA	NA	NA	NA	-	966	7	931	4	24	89.86	0.72	19.83	2.74e-30	0.367975
Correlated	C2ORF68	NA	NA	NA	NA	NA	NA	NA	+	1027	10	984	7	26	95.53	0.97	16.781	6.97e-36	0.390224
Correlated	C2ORF88	NA	NA	NA	NA	NA	NA	NA	+	1031	10	988	7	26	95.91	0.97	16.846	5.02e-36	0.39028
Correlated	C3	complement component 3 [Source:HGNC Symbol;Acc:1318]	LRG_27		1	5001	47817	LRG_27	-	935	9	897	9	20	86.98	0.96	16.121	4.66e-31	0.379016
Correlated	C3ORF14	NA	NA	NA	NA	NA	NA	NA	-	1064	9	1024	5	26	98.98	0.85	19.543	5.77e-38	0.394887
Correlated	C3ORF80	NA	NA	NA	NA	NA	NA	NA	+	927	8	888	4	27	86.23	0.86	17.657	1.25e-30	0.377861
Correlated	C3ORF80	NA	NA	NA	NA	NA	NA	NA	-	927	9	887	5	26	86.23	0.97	17.027	5.16e-33	0.393115
Correlated	C4BPB	complement component 4 binding protein, beta [Source:HGNC Symbol;Acc:1328]	1	q32.2	1	207262187	207273338	ENSG00000123843	+	921	6	886	5	24	85.67	0.65	16.745	5.41e-22	0.317653
Correlated	C4ORF47	NA	NA	NA	NA	NA	NA	NA	+	949	9	901	13	26	88.28	0.95	11.092	7.09e-21	0.304242
Correlated	C5	complement component 5 [Source:HGNC Symbol;Acc:1331]	LRG_28		1	5001	102942	LRG_28	-	956	8	919	5	24	88.93	0.84	18.385	7.5e-32	0.379857
Correlated	C5AR1	complement component 5a receptor 1 [Source:HGNC Symbol;Acc:1338]	19	q13.32	1	47793280	47825323	ENSG00000197405	-	938	7	904	3	24	87.26	0.75	21.181	1.88e-32	0.387292
Correlated	C5ORF30	NA	NA	NA	NA	NA	NA	NA	-	957	7	923	5	22	89.02	0.73	19.25	2.41e-29	0.363549
Correlated	C5ORF42	NA	NA	NA	NA	NA	NA	NA	-	955	5	922	3	25	88.84	0.52	19.896	4.22e-22	0.312771
Correlated	C5ORF56	NA	NA	NA	NA	NA	NA	NA	-	1012	9	968	6	29	94.14	0.89	15.979	7.85e-31	0.362904
Correlated	C6	complement component 6 [Source:HGNC Symbol;Acc:1339]	LRG_29		1	52874	124205	LRG_29	-	922	9	890	4	19	85.77	0.98	22.797	1.4e-44	0.461308
Correlated	C6ORF48	NA	NA	NA	NA	NA	NA	NA	+	966	7	926	5	28	89.86	0.72	16.1	1.87e-24	0.328362
Correlated	C6ORF52	NA	NA	NA	NA	NA	NA	NA	+	1005	7	967	3	28	93.49	0.7	20.1	9.25e-31	0.363722
Correlated	C7	complement component 7 [Source:HGNC Symbol;Acc:1346]	LRG_30		1	5001	78443	LRG_30	-	933	8	898	5	22	86.79	0.86	19.138	3.37e-33	0.393002
Correlated	C7ORF10	NA	NA	NA	NA	NA	NA	NA	+	943	8	907	5	23	87.72	0.85	18.72	1.89e-32	0.386249
Correlated	C7ORF31	NA	NA	NA	NA	NA	NA	NA	+	1012	7	972	4	29	94.14	0.69	17.889	2.87e-27	0.340022
Correlated	C7ORF55	NA	NA	NA	NA	NA	NA	NA	+	1064	6	1027	2	29	98.98	0.56	22.8	3.53e-30	0.349942
Correlated	C7ORF73	NA	NA	NA	NA	NA	NA	NA	+	973	9	936	2	26	90.51	0.92	22.745	1.4e-44	0.449169
Correlated	C8ORF34	NA	NA	NA	NA	NA	NA	NA	-	1013	8	974	4	27	94.23	0.79	19.295	1.7e-33	0.378945
Correlated	C8ORF59	NA	NA	NA	NA	NA	NA	NA	+	985	6	945	4	30	91.63	0.61	16.417	1.38e-21	0.304093
Correlated	C9ORF64	NA	NA	NA	NA	NA	NA	NA	+	1016	5	979	1	31	94.51	0.49	23.519	2.88e-26	0.332654
Correlated	C9ORF85	NA	NA	NA	NA	NA	NA	NA	+	1018	7	976	6	29	94.7	0.69	15.226	4.86e-23	0.3098
Correlated	C9ORF91	NA	NA	NA	NA	NA	NA	NA	-	970	8	933	5	24	90.23	0.82	18.654	2.54e-32	0.380039
Correlated	CA10	carbonic anhydrase X [Source:HGNC Symbol;Acc:1369]	17	q22	-1	49707674	50237377	ENSG00000154975	-	1046	6	1005	4	31	97.3	0.57	16.962	2.67e-22	0.300308
Correlated	CA11	carbonic anhydrase XI [Source:HGNC Symbol;Acc:1370]	19	q13.33	-1	49141199	49149569	ENSG00000063180	-	961	8	926	6	21	89.4	0.83	18.936	8.75e-33	0.384685
Correlated	CA14	carbonic anhydrase XIV [Source:HGNC Symbol;Acc:1372]	1	q21.2	1	150229554	150237478	ENSG00000118298	+	933	4	903	2	24	86.79	0.43	22.214	4.74e-20	0.300206
Correlated	CA3	carbonic anhydrase III, muscle specific [Source:HGNC Symbol;Acc:1374]	8	q21.2	1	86285665	86361269	ENSG00000164879	+	950	9	918	3	20	88.37	0.95	24.569	0	0.473041
Correlated	CA4	carbonic anhydrase IV [Source:HGNC Symbol;Acc:1375]	17	q23.1	1	58227297	58248260	ENSG00000167434	-	931	11	894	8	18	86.6	1.18	18.586	7.57e-44	0.455142
Correlated	CABP1	calcium binding protein 1 [Source:HGNC Symbol;Acc:1384]	12	q24.31	1	121078355	121105127	ENSG00000157782	-	943	9	907	7	20	87.72	0.95	18.291	1.9e-35	0.404636
Correlated	CABP2	calcium binding protein 2 [Source:HGNC Symbol;Acc:1385]	11	q13.2	-1	67286383	67290899	ENSG00000167791	-	907	3	879	0	25	84.37	0.33	32.393	2.46e-22	0.322769
Correlated	CACNA1C	calcium channel, voltage-dependent, L type, alpha 1C subunit [Source:HGNC Symbol;Acc:1390]	LRG_334		1	87465	732164	LRG_334	-	1061	6	1023	3	29	98.7	0.57	20.21	1.14e-26	0.328164
Correlated	CACNA1E	calcium channel, voltage-dependent, R type, alpha 1E subunit [Source:HGNC Symbol;Acc:1392]	1	q25.3	1	181382238	181777219	ENSG00000198216	-	1033	7	996	1	29	96.09	0.68	25.108	1.11e-38	0.404708
Correlated	CACNA1F	calcium channel, voltage-dependent, L type, alpha 1F subunit [Source:HGNC Symbol;Acc:1393]	HG1436_HG1432_PATCH	p11.23	-1	49064462	49092770	ENSG00000269057	-	909	4	881	0	24	84.56	0.44	32.464	2.5e-29	0.372919
Correlated	CACNA2D1	calcium channel, voltage-dependent, alpha 2/delta subunit 1 [Source:HGNC Symbol;Acc:1399]	LRG_437		1	5001	498614	LRG_437	-	1026	11	980	9	26	95.44	1.07	15.251	1.41e-35	0.388664
Correlated	CACNA2D2	calcium channel, voltage-dependent, alpha 2/delta subunit 2 [Source:HGNC Symbol;Acc:1400]	3	p21.31	-1	50400233	50541675	ENSG00000007402	-	952	7	918	3	24	88.56	0.74	21.497	6.15e-33	0.387446
Correlated	CACNA2D3	calcium channel, voltage-dependent, alpha 2/delta subunit 3 [Source:HGNC Symbol;Acc:15460]	3	p21.1	1	54156574	55108584	ENSG00000157445	-	931	7	896	5	23	86.6	0.75	18.103	1.42e-27	0.356613
Correlated	CACNB1	calcium channel, voltage-dependent, beta 1 subunit [Source:HGNC Symbol;Acc:1401]	17	q12	-1	37329709	37353956	ENSG00000067191	-	945	12	913	3	17	87.91	1.27	26.069	0	0.566489
Correlated	CACNB2	calcium channel, voltage-dependent, beta 2 subunit [Source:HGNC Symbol;Acc:1402]	10	p12.33	1	18429606	18830798	ENSG00000165995	-	957	9	913	13	22	89.02	0.94	12.629	5.71e-24	0.326381
Correlated	CACNB3	calcium channel, voltage-dependent, beta 3 subunit [Source:HGNC Symbol;Acc:1403]	12	q13.12	1	49207577	49222724	ENSG00000167535	+	970	7	934	7	22	90.23	0.72	16.724	2.38e-25	0.334046
Correlated	CACNB3	calcium channel, voltage-dependent, beta 3 subunit [Source:HGNC Symbol;Acc:1403]	12	q13.12	1	49207577	49222724	ENSG00000167535	-	970	9	937	4	20	90.23	0.93	23.156	2.8e-45	0.453337
Correlated	CACNG2	calcium channel, voltage-dependent, gamma subunit 2 [Source:HGNC Symbol;Acc:1406]	22	q12.3	-1	36959968	37099603	ENSG00000166862	-	1026	5	990	1	30	95.44	0.49	24.429	2.87e-27	0.33769
Correlated	CACNG3	calcium channel, voltage-dependent, gamma subunit 3 [Source:HGNC Symbol;Acc:1407]	16	p12.1	1	24266874	24374122	ENSG00000006116	-	913	5	885	0	23	84.93	0.55	32.607	1.96e-36	0.417191
Correlated	CACNG4	calcium channel, voltage-dependent, gamma subunit 4 [Source:HGNC Symbol;Acc:1408]	17	q24.2	1	64961026	65029514	ENSG00000075461	+	1038	6	999	3	30	96.56	0.58	19.222	2.3e-25	0.323022
Correlated	CACNG8	calcium channel, voltage-dependent, gamma subunit 8 [Source:HGNC Symbol;Acc:13628]	19	q13.42	1	54466294	54493469	ENSG00000142408	-	1002	6	965	2	29	93.21	0.6	21.471	1.96e-28	0.349398
Correlated	CADM2	cell adhesion molecule 2 [Source:HGNC Symbol;Acc:29849]	3	p12.1	1	85008132	86123579	ENSG00000175161	-	1030	9	984	9	28	95.81	0.87	13.919	1.35e-26	0.332582
Correlated	CALCRL	calcitonin receptor-like [Source:HGNC Symbol;Acc:16709]	2	q32.1	-1	188207856	188313187	ENSG00000064989	-	1060	8	1016	7	29	98.6	0.75	15.279	3.22e-26	0.325354
Correlated	CALN1	calneuron 1 [Source:HGNC Symbol;Acc:13248]	7	q11.22	-1	71244476	71912136	ENSG00000183166	-	1038	15	998	4	21	96.56	1.45	22.763	0	0.563286
Correlated	CALR	calreticulin [Source:HGNC Symbol;Acc:1455]	19	p13.2	1	13049392	13055303	ENSG00000179218	+	949	7	912	8	22	88.28	0.74	15.271	4.52e-23	0.3211
Correlated	CALU	calumenin [Source:HGNC Symbol;Acc:1458]	7	q32.1	1	128379346	128411861	ENSG00000128595	+	1069	10	1025	8	26	99.44	0.94	16.497	3.41e-35	0.378601
Correlated	CALY	calcyon neuron-specific vesicular protein [Source:HGNC Symbol;Acc:17938]	10	q26.3	-1	135138927	135150475	ENSG00000130643	-	942	5	911	1	25	87.63	0.53	26.167	3.39e-29	0.365449
Correlated	CAMK1D	calcium/calmodulin-dependent protein kinase ID [Source:HGNC Symbol;Acc:19341]	10	p13	1	12391481	12877545	ENSG00000183049	-	1067	11	1027	3	26	99.26	1.03	22.658	0	0.473322
Correlated	CAMK1G	calcium/calmodulin-dependent protein kinase IG [Source:HGNC Symbol;Acc:14585]	1	q32.2	1	209757062	209787283	ENSG00000008118	-	904	6	873	2	23	84.09	0.66	23.379	5.52e-31	0.384975
Correlated	CAMK2A	calcium/calmodulin-dependent protein kinase II alpha [Source:HGNC Symbol;Acc:1460]	5	q32	-1	149599054	149669854	ENSG00000070808	-	944	9	909	4	22	87.81	0.95	21.082	3.78e-41	0.437267
Correlated	CAMK2B	calcium/calmodulin-dependent protein kinase II beta [Source:HGNC Symbol;Acc:1461]	7	p13	-1	44256749	44374176	ENSG00000058404	-	971	8	933	9	21	90.33	0.82	15.757	4.77e-27	0.345629
Correlated	CAMK2G	calcium/calmodulin-dependent protein kinase II gamma [Source:HGNC Symbol;Acc:1463]	10	q22.2	-1	75572259	75634343	ENSG00000148660	-	970	10	923	16	21	90.23	1.03	12.035	3.64e-25	0.332744
Correlated	CAMK2N1	calcium/calmodulin-dependent protein kinase II inhibitor 1 [Source:HGNC Symbol;Acc:24190]	1	p36.12	-1	20808884	20812713	ENSG00000162545	+	1074	9	1025	11	29	99.91	0.84	12.718	4e-24	0.309155
Correlated	CAMK2N2	calcium/calmodulin-dependent protein kinase II inhibitor 2 [Source:HGNC Symbol;Acc:24197]	3	q27.1	-1	183977001	183979251	ENSG00000163888	-	1039	6	1003	1	29	96.65	0.58	25.445	8.65e-34	0.375893
Correlated	CAMK4	calcium/calmodulin-dependent protein kinase IV [Source:HGNC Symbol;Acc:1464]	5	q22.1	1	110559351	110830584	ENSG00000152495	-	1062	10	1011	13	28	98.79	0.94	12.151	2.11e-25	0.319605
Correlated	CAMKK1	calcium/calmodulin-dependent protein kinase kinase 1, alpha [Source:HGNC Symbol;Acc:1469]	17	p13.2	-1	3763609	3798185	ENSG00000004660	-	1019	8	979	5	27	94.79	0.79	17.916	5.37e-31	0.362676
Correlated	CAMKK2	calcium/calmodulin-dependent protein kinase kinase 2, beta [Source:HGNC Symbol;Acc:1470]	12	q24.31	-1	121675497	121736111	ENSG00000110931	-	974	11	935	8	20	90.6	1.13	18.19	7.69e-43	0.439622
Correlated	CAMKV	CaM kinase-like vesicle-associated [Source:HGNC Symbol;Acc:28788]	3	p21.31	-1	49895421	49907655	ENSG00000164076	-	941	7	907	3	24	87.53	0.74	21.248	1.48e-32	0.387325
Correlated	CAMSAP1	calmodulin regulated spectrin-associated protein 1 [Source:HGNC Symbol;Acc:19946]	9	q34.3	-1	138700333	138799074	ENSG00000130559	+	1073	8	1027	8	30	99.81	0.75	14.118	4.05e-24	0.309261
Correlated	CAMSAP3	calmodulin regulated spectrin-associated protein family, member 3 [Source:HGNC Symbol;Acc:29307]	19	p13.2	1	7660788	7683190	ENSG00000076826	-	1063	7	1021	5	30	98.88	0.66	16.759	1.89e-25	0.319776
Correlated	CAMTA1	calmodulin binding transcription activator 1 [Source:HGNC Symbol;Acc:18806]	1	p36.31	1	6845384	7829766	ENSG00000171735	-	1074	12	1021	15	26	99.91	1.12	12.561	2.22e-31	0.355575
Correlated	CAMTA2	calmodulin binding transcription activator 2 [Source:HGNC Symbol;Acc:18807]	17	p13.2	-1	4871287	4890960	ENSG00000108509	-	960	6	926	3	25	89.3	0.63	20.645	2.87e-27	0.349108
Correlated	CANT1	calcium activated nucleotidase 1 [Source:HGNC Symbol;Acc:19721]	17	q25.3	-1	76987799	77005949	ENSG00000171302	+	972	8	936	6	22	90.42	0.82	18.514	4.95e-32	0.377841
Correlated	CAP1	CAP, adenylate cyclase-associated protein 1 (yeast) [Source:HGNC Symbol;Acc:20040]	1	p34.2	1	40505905	40538321	ENSG00000131236	+	954	6	922	1	25	88.74	0.63	26.378	4.84e-35	0.399861
Correlated	CAP2	CAP, adenylate cyclase-associated protein, 2 (yeast) [Source:HGNC Symbol;Acc:20039]	6	p22.3	1	17393447	17558023	ENSG00000112186	-	972	13	931	10	18	90.42	1.34	17.722	0	0.472512
Correlated	CAPG	capping protein (actin filament), gelsolin-like [Source:HGNC Symbol;Acc:1474]	2	p11.2	-1	85621871	85645555	ENSG00000042493	+	945	7	911	5	22	87.91	0.74	19.009	5.65e-29	0.363397
Correlated	CAPN1	calpain 1, (mu/I) large subunit [Source:HGNC Symbol;Acc:1476]	11	q13.1	1	64948037	64979477	ENSG00000014216	-	1066	5	1029	2	30	99.16	0.47	21.755	3.28e-24	0.310907
Correlated	CAPN13	calpain 13 [Source:HGNC Symbol;Acc:16663]	2	p23.1	-1	30945637	31043408	ENSG00000162949	-	1015	9	973	7	26	94.42	0.89	16.312	1.87e-31	0.366222
Correlated	CAPN3	calpain 3, (p94) [Source:HGNC Symbol;Acc:1480]	15	q15.1	1	42640301	42704516	ENSG00000092529	-	946	9	905	12	20	88	0.95	13.98	1.05e-26	0.347806
Correlated	CAPN9	calpain 9 [Source:HGNC Symbol;Acc:1486]	1	q42.2	1	230883130	230937749	ENSG00000135773	+	928	7	889	8	24	86.33	0.75	13.97	4.75e-21	0.309052
Correlated	CARD8	caspase recruitment domain family, member 8 [Source:HGNC Symbol;Acc:17057]	19	q13.33	-1	48684027	48759203	ENSG00000105483	+	1050	9	1011	3	27	97.67	0.86	21.875	9.61e-43	0.422913
Correlated	CARTPT	CART prepropeptide [Source:HGNC Symbol;Acc:24323]	5	q13.2	1	71014990	71016875	ENSG00000164326	-	935	6	901	3	25	86.98	0.64	20.108	1.46e-26	0.348832
Correlated	CASC5	cancer susceptibility candidate 5 [Source:HGNC Symbol;Acc:24054]	15	q15.1	1	40886218	40956540	ENSG00000137812	+	1018	13	964	19	22	94.7	1.28	11.816	8.83e-32	0.367674
Correlated	CASK	calcium/calmodulin-dependent serine protein kinase (MAGUK family) [Source:HGNC Symbol;Acc:1497]	X	p11.4	-1	41374187	41782716	ENSG00000147044	+	1071	13	1024	10	24	99.63	1.21	16.361	4.2e-45	0.430464
Correlated	CASKIN1	CASK interacting protein 1 [Source:HGNC Symbol;Acc:20879]	16	p13.3	-1	2227184	2246526	ENSG00000167971	-	1021	6	983	3	29	94.98	0.59	19.448	1.15e-25	0.327768
Correlated	CASKIN1	CASK interacting protein 1 [Source:HGNC Symbol;Acc:20879]	16	p13.3	-1	2227184	2246526	ENSG00000167971	+	1021	6	982	4	29	94.98	0.59	17.503	5.04e-23	0.309228
Correlated	CASP3	caspase 3, apoptosis-related cysteine peptidase [Source:HGNC Symbol;Acc:1504]	4	q35.1	-1	185548850	185570663	ENSG00000164305	+	1068	10	1027	5	26	99.35	0.94	19.778	1.35e-42	0.418588
Correlated	CASP6	caspase 6, apoptosis-related cysteine peptidase [Source:HGNC Symbol;Acc:1507]	4	q25	-1	110609785	110624739	ENSG00000138794	+	956	8	923	2	23	88.93	0.84	24.671	3.57e-43	0.445534
Correlated	CAST	calpastatin [Source:HGNC Symbol;Acc:1515]	5	q15	1	95860971	96115299	ENSG00000153113	+	945	7	910	6	22	87.91	0.74	17.546	1.15e-26	0.347711
Correlated	CASZ1	castor zinc finger 1 [Source:HGNC Symbol;Acc:26002]	1	p36.22	-1	10696661	10856707	ENSG00000130940	+	1048	13	993	19	23	97.49	1.24	11.826	8.79e-32	0.362387
Correlated	CAT	catalase [Source:HGNC Symbol;Acc:1516]	11	p13	1	34460472	34493609	ENSG00000121691	-	962	8	920	11	23	89.49	0.83	13.066	3.21e-22	0.312535
Correlated	CAT	catalase [Source:HGNC Symbol;Acc:1516]	11	p13	1	34460472	34493609	ENSG00000121691	+	962	10	925	6	21	89.49	1.04	19.395	9.11e-42	0.43654
Correlated	CBFA2T3	core-binding factor, runt domain, alpha subunit 2; translocated to, 3 [Source:HGNC Symbol;Acc:1537]	16	q24.3	-1	88941266	89043612	ENSG00000129993	-	949	11	915	3	20	88.28	1.16	24.053	0	0.518376
Correlated	CBFB	core-binding factor, beta subunit [Source:HGNC Symbol;Acc:1539]	16	q22.1	1	67063019	67134961	ENSG00000067955	+	970	6	935	6	23	90.23	0.62	16.724	6.46e-22	0.308943
Correlated	CBL	Cbl proto-oncogene, E3 ubiquitin protein ligase [Source:HGNC Symbol;Acc:1541]	11	q23.3	1	119076752	119178859	ENSG00000110395	+	1057	8	1012	8	29	98.33	0.76	14.284	2.03e-24	0.313659
Correlated	CBLB	Cbl proto-oncogene B, E3 ubiquitin protein ligase [Source:HGNC Symbol;Acc:1542]	3	q13.11	-1	105374305	105588396	ENSG00000114423	+	1031	12	977	17	25	95.91	1.16	11.53	1.28e-28	0.345631
Correlated	CBLL1	Cbl proto-oncogene-like 1, E3 ubiquitin protein ligase [Source:HGNC Symbol;Acc:21225]	7	q22.3	1	107384142	107400131	ENSG00000105879	+	1059	6	1018	4	31	98.51	0.57	17.173	1.41e-22	0.300454
Correlated	CBLN2	cerebellin 2 precursor [Source:HGNC Symbol;Acc:1544]	18	q22.3	-1	70203915	70305756	ENSG00000141668	-	1016	7	979	3	27	94.51	0.69	20.918	5.07e-32	0.369507
Correlated	CBLN4	cerebellin 4 precursor [Source:HGNC Symbol;Acc:16231]	20	q13.2	-1	54572496	54580528	ENSG00000054803	-	1017	11	974	9	23	94.6	1.08	16.451	1.6e-38	0.407005
Correlated	CBR4	carbonyl reductase 4 [Source:HGNC Symbol;Acc:25891]	4	q32.3	-1	169784921	169931426	ENSG00000145439	+	1068	9	1027	5	27	99.35	0.84	19.071	5.04e-37	0.388998
Correlated	CBS	cystathionine-beta-synthase [Source:HGNC Symbol;Acc:1550]	21	q22.3	-1	44473301	44497053	ENSG00000160200	+	1056	13	1002	19	22	98.23	1.23	12.257	4.92e-33	0.368446
Correlated	CBWD1	COBW domain containing 1 [Source:HGNC Symbol;Acc:17134]	9	p24.3	-1	121041	188979	ENSG00000172785	+	981	5	944	2	30	91.26	0.51	20.02	2.62e-22	0.310154
Correlated	CBX3	chromobox homolog 3 [Source:HGNC Symbol;Acc:1553]	7	p15.2	1	26240782	26252976	ENSG00000122565	+	1070	7	1026	6	31	99.53	0.65	15.162	6.31e-23	0.301376
Correlated	CBX5	chromobox homolog 5 [Source:HGNC Symbol;Acc:1555]	12	q13.13	-1	54624724	54673886	ENSG00000094916	+	1070	8	1024	8	30	99.53	0.75	14.079	4.75e-24	0.309218
Correlated	CBX6	chromobox homolog 6 [Source:HGNC Symbol;Acc:1556]	22	q13.1	-1	39257455	39268319	ENSG00000183741	-	950	8	912	9	21	88.37	0.84	15.416	1.88e-26	0.345297
Correlated	CBX8	chromobox homolog 8 [Source:HGNC Symbol;Acc:15962]	HG748_PATCH	q25.3	-1	77788214	77797765	ENSG00000262572	+	932	4	902	2	24	86.7	0.43	22.19	4.97e-20	0.300197
Correlated	CCAR1	cell division cycle and apoptosis regulator 1 [Source:HGNC Symbol;Acc:24236]	10	q21.3	1	70480769	70552134	ENSG00000060339	+	1044	7	1002	6	29	97.12	0.67	15.615	1.23e-23	0.310151
Correlated	CCBE1	collagen and calcium binding EGF domains 1 [Source:HGNC Symbol;Acc:29426]	18	q21.32	-1	57098172	57364612	ENSG00000183287	-	1045	17	990	17	21	97.21	1.63	13.75	0	0.454204
Correlated	CCBL1	cysteine conjugate-beta lyase, cytoplasmic [Source:HGNC Symbol;Acc:1564]	9	q34.11	-1	131595221	131644773	ENSG00000171097	+	972	7	936	5	24	90.42	0.72	18.29	7.5e-28	0.350868
Correlated	CCDC110	coiled-coil domain containing 110 [Source:HGNC Symbol;Acc:28504]	4	q35.1	-1	186366336	186392913	ENSG00000168491	-	999	10	957	5	27	92.93	1	18	1.07e-38	0.411633
Correlated	CCDC116	coiled-coil domain containing 116 [Source:HGNC Symbol;Acc:26688]	22	q11.21	1	21987007	21991616	ENSG00000161180	-	888	4	859	1	24	82.6	0.45	25.371	6.14e-23	0.330914
Correlated	CCDC132	coiled-coil domain containing 132 [Source:HGNC Symbol;Acc:25956]	7	q21.3	1	92861653	92988338	ENSG00000004766	+	1049	8	1005	8	28	97.58	0.76	14.569	6.28e-25	0.31836
Correlated	CCDC138	coiled-coil domain containing 138 [Source:HGNC Symbol;Acc:26531]	2	q12.3	1	109403213	109493034	ENSG00000163006	+	1014	5	975	2	32	94.33	0.49	19.575	8.22e-22	0.301386
Correlated	CCDC167	coiled-coil domain containing 167 [Source:HGNC Symbol;Acc:21239]	6	p21.2	-1	37450696	37467698	ENSG00000198937	+	1067	8	1024	8	27	99.26	0.75	15.243	4.04e-26	0.323631
Correlated	CCDC173	coiled-coil domain containing 173 [UniGene: NA]						unknown	+	978	4	943	0	31	90.98	0.41	27.943	2.41e-25	0.332638
Correlated	CCDC177	coiled-coil domain containing 177 [UniGene: NA]						unknown	-	820	5	792	1	22	76.28	0.61	25.309	2.82e-28	0.385096
Correlated	CCDC18	coiled-coil domain containing 18 [Source:HGNC Symbol;Acc:30370]	1	p22.1	1	93645476	93744287	ENSG00000122483	+	982	10	944	3	25	91.35	1.02	21.582	0	0.458316
Correlated	CCDC23	coiled-coil domain containing 23 [Source:HGNC Symbol;Acc:29204]	1	p34.2	-1	43272723	43282954	ENSG00000177868	+	1031	7	991	4	29	95.91	0.68	18.225	8.76e-28	0.340243
Correlated	CCDC3	coiled-coil domain containing 3 [Source:HGNC Symbol;Acc:23813]	10	p13	-1	12938627	13141652	ENSG00000151468	-	1050	10	1001	14	25	97.67	0.95	12.5	3.56e-26	0.326611
Correlated	CCDC34	coiled-coil domain containing 34 [Source:HGNC Symbol;Acc:25079]	11	p14.1	-1	27352374	27385415	ENSG00000109881	+	1023	8	979	7	29	95.16	0.78	14.746	2.77e-25	0.324827
Correlated	CCDC37	coiled-coil domain containing 37 [Source:HGNC Symbol;Acc:26842]	3	q21.3	1	126113782	126155399	ENSG00000163885	+	1009	7	971	3	28	93.86	0.69	20.18	6.97e-31	0.363765
Correlated	CCDC40	coiled-coil domain containing 40 [Source:HGNC Symbol;Acc:26090]	17	q25.3	1	78010435	78074412	ENSG00000141519	+	1049	8	1009	4	28	97.58	0.76	19.426	1.03e-33	0.37366
Correlated	CCDC50	coiled-coil domain containing 50 [Source:HGNC Symbol;Acc:18111]	3	q28	1	191046866	191116459	ENSG00000152492	+	1047	10	996	13	28	97.4	0.96	11.979	5.01e-25	0.319329
Correlated	CCDC64	coiled-coil domain containing 64 [Source:HGNC Symbol;Acc:28095]	12	q24.23	1	120427673	120532298	ENSG00000135127	-	986	9	948	5	24	91.72	0.91	19.208	2.46e-37	0.406629
Correlated	CCDC64	coiled-coil domain containing 64 [Source:HGNC Symbol;Acc:28095]	12	q24.23	1	120427673	120532298	ENSG00000135127	+	986	8	947	6	25	91.72	0.81	17.074	1.81e-29	0.358967
Correlated	CCDC68	coiled-coil domain containing 68 [Source:HGNC Symbol;Acc:24350]	18	q21.2	-1	52568740	52626739	ENSG00000166510	-	933	7	897	5	24	86.79	0.75	17.556	1e-26	0.350353
Correlated	CCDC69	coiled-coil domain containing 69 [Source:HGNC Symbol;Acc:24487]	5	q33.1	-1	150560613	150603706	ENSG00000198624	-	1056	10	1005	14	27	98.23	0.95	11.892	8.21e-25	0.316507
Correlated	CCDC74B	coiled-coil domain containing 74B [Source:HGNC Symbol;Acc:25267]	2	q21.1	-1	130896860	130902707	ENSG00000152076	+	989	9	941	12	27	92	0.91	11.774	3.03e-22	0.308423
Correlated	CCDC80	coiled-coil domain containing 80 [Source:HGNC Symbol;Acc:30649]	3	q13.2	-1	112323407	112368377	ENSG00000091986	-	1038	11	984	18	25	96.56	1.06	10.937	8.01e-25	0.319313
Correlated	CCDC85A	coiled-coil domain containing 85A [Source:HGNC Symbol;Acc:29400]	2	p16.1	1	56411258	56613308	ENSG00000055813	-	1027	12	981	10	24	95.53	1.17	15.561	1.52e-39	0.410603
Correlated	CCDC93	coiled-coil domain containing 93 [Source:HGNC Symbol;Acc:25611]	2	q14.1	-1	118673054	118771709	ENSG00000125633	-	1074	8	1031	5	30	99.91	0.74	17.393	4.75e-30	0.347518
Correlated	CCDC94	coiled-coil domain containing 94 [Source:HGNC Symbol;Acc:25518]	19	p13.3	1	4247076	4269087	ENSG00000105248	+	968	4	938	1	25	90.05	0.41	26.703	4.21e-24	0.325484
Correlated	CCK	cholecystokinin [Source:HGNC Symbol;Acc:1569]	3	p22.1	-1	42299317	42307699	ENSG00000187094	-	911	7	874	6	24	84.74	0.77	15.824	5.3e-24	0.33476
Correlated	CCKBR	cholecystokinin B receptor [Source:HGNC Symbol;Acc:1571]	11	p15.4	1	6280966	6293357	ENSG00000110148	-	1023	9	983	5	26	95.16	0.88	18.79	1.75e-36	0.394407
Correlated	CCL14	chemokine (C-C motif) ligand 14 [Source:HGNC Symbol;Acc:10612]	17	q12	-1	34310327	34329100	ENSG00000213494	-	855	6	822	6	21	79.53	0.7	15.833	9.22e-21	0.319582
Correlated	CCL2	chemokine (C-C motif) ligand 2 [Source:HGNC Symbol;Acc:10618]	17	q12	1	32582304	32584222	ENSG00000108691	-	953	11	906	16	20	88.65	1.15	12.524	8.07e-29	0.360839
Correlated	CCL21	chemokine (C-C motif) ligand 21 [Source:HGNC Symbol;Acc:10620]	9	p13.3	-1	34709002	34710121	ENSG00000137077	-	937	4	907	2	24	87.16	0.43	22.31	3.91e-20	0.300242
Correlated	CCL22	chemokine (C-C motif) ligand 22 [Source:HGNC Symbol;Acc:10621]	16	q13	1	57392684	57400102	ENSG00000102962	-	919	4	888	1	26	85.49	0.44	24.507	3.59e-22	0.319384
Correlated	CCL8	chemokine (C-C motif) ligand 8 [Source:HGNC Symbol;Acc:10635]	17	q12	1	32646055	32648421	ENSG00000108700	-	917	5	885	4	23	85.3	0.55	18.194	3.59e-20	0.303805
Correlated	CCM2L	cerebral cavernous malformation 2-like [UniGene: NA]						unknown	-	999	8	959	5	27	92.93	0.8	17.565	2.22e-30	0.362423
Correlated	CCNA2	cyclin A2 [Source:HGNC Symbol;Acc:1578]	4	q27	-1	122737599	122745087	ENSG00000145386	+	970	14	922	19	15	90.23	1.44	14.19	9.84e-42	0.434552
Correlated	CCNB1	cyclin B1 [Source:HGNC Symbol;Acc:1579]	5	q13.2	1	68462837	68474072	ENSG00000134057	+	1054	13	999	18	24	98.05	1.23	11.946	3.93e-32	0.363443
Correlated	CCNB2	cyclin B2 [Source:HGNC Symbol;Acc:1580]	15	q22.2	1	59397277	59417244	ENSG00000157456	+	1052	16	997	18	21	97.86	1.52	13.38	1.4e-44	0.431969
Correlated	CCNC	cyclin C [Source:HGNC Symbol;Acc:1581]	6	q16.2	-1	99990256	100016849	ENSG00000112237	+	977	5	942	3	27	90.88	0.51	19.082	3.38e-21	0.302336
Correlated	CCNDBP1	cyclin D-type binding-protein 1 [Source:HGNC Symbol;Acc:1587]	15	q15.2	1	43477316	43487396	ENSG00000166946	+	1010	5	976	1	28	93.95	0.5	25.505	1.86e-28	0.348156
Correlated	CCNF	cyclin F [Source:HGNC Symbol;Acc:1591]	16	p13.3	1	2479395	2508855	ENSG00000162063	+	968	8	932	7	21	90.05	0.83	17.802	9.78e-31	0.370454
Correlated	CCP110	centriolar coiled coil protein 110kDa [Source:HGNC Symbol;Acc:24342]	16	p12.3	1	19535133	19564730	ENSG00000103540	-	962	8	927	6	21	89.49	0.83	18.956	8.08e-33	0.384698
Correlated	CCSAP	centriole, cilia and spindle-associated protein [UniGene: Transcribed locus]						unknown	+	1015	7	975	5	28	94.42	0.69	16.917	1.04e-25	0.329013
Correlated	CCSER2	coiled-coil serine-rich protein 2 [UniGene: NA]						unknown	-	977	6	940	5	26	90.88	0.61	16.653	7.41e-22	0.30738
Correlated	CCT6A	chaperonin containing TCP1, subunit 6A (zeta 1) [Source:HGNC Symbol;Acc:1620]	7	p11.2	1	56119323	56131682	ENSG00000146731	+	966	8	934	3	21	89.86	0.83	24.226	2.67e-42	0.438523
Correlated	CD163	CD163 molecule [Source:HGNC Symbol;Acc:1631]	12	p13.31	-1	7623409	7656489	ENSG00000177575	-	942	8	902	8	24	87.63	0.85	14.719	3.1e-25	0.338161
Correlated	CD163L1	CD163 molecule-like 1 [Source:HGNC Symbol;Acc:30375]	12	p13.31	-1	7499281	7632493	ENSG00000177675	-	1048	5	1011	0	32	97.49	0.48	28.324	1.05e-31	0.361924
Correlated	CD200	CD200 molecule [Source:HGNC Symbol;Acc:7203]	3	q13.2	1	112051194	112081659	ENSG00000091972	-	943	12	902	12	17	87.72	1.27	16.259	1.84e-41	0.439227
Correlated	CD22	CD22 molecule [Source:HGNC Symbol;Acc:1643]	19	q13.12	1	35810164	35838258	ENSG00000012124	-	928	10	883	13	22	86.33	1.08	12.609	1.67e-26	0.349739
Correlated	CD24	CD24 molecule [Source:HGNC Symbol;Acc:1645]	HG357_PATCH	q21	-1	107417708	107422630	ENSG00000272398	+	955	9	909	15	22	88.84	0.94	11.552	8.79e-22	0.310333
Correlated	CD248	CD248 molecule, endosialin [Source:HGNC Symbol;Acc:18219]	11	q13.2	-1	66081958	66084515	ENSG00000174807	-	926	6	890	6	24	86.14	0.65	15.433	3.3e-20	0.302615
Correlated	CD276	CD276 molecule [Source:HGNC Symbol;Acc:19137]	15	q24.1	1	73976307	74006859	ENSG00000103855	+	1065	6	1026	4	29	99.07	0.56	18.257	5.13e-24	0.309712
Correlated	CD2AP	CD2-associated protein [Source:HGNC Symbol;Acc:14258]	6	p12.3	1	47445525	47594999	ENSG00000198087	+	1055	7	1015	2	31	98.14	0.66	21.594	3.84e-33	0.369248
Correlated	CD300A	CD300a molecule [Source:HGNC Symbol;Acc:19319]	17	q25.1	1	72462555	72480933	ENSG00000167851	+	952	6	918	5	23	88.56	0.63	17.906	1.58e-23	0.323996
Correlated	CD302	CD302 molecule [Source:HGNC Symbol;Acc:30843]	2	q24.2	-1	160625364	160654753	ENSG00000241399	-	967	9	923	15	20	89.95	0.93	12.504	1.07e-23	0.322707
Correlated	CD34	CD34 molecule [Source:HGNC Symbol;Acc:1662]	1	q32.2	-1	208057594	208084747	ENSG00000174059	-	932	10	897	4	21	86.7	1.07	21.475	0	0.469005
Correlated	CD40	CD40 molecule, TNF receptor superfamily member 5 [Source:HGNC Symbol;Acc:11919]	LRG_40		1	5001	16479	LRG_40	-	950	7	915	6	22	88.37	0.74	17.639	8.26e-27	0.34778
Correlated	CD52	CD52 molecule [Source:HGNC Symbol;Acc:1804]	1	p36.11	1	26644448	26647014	ENSG00000169442	-	907	8	868	8	23	84.37	0.88	14.629	4.31e-25	0.34357
Correlated	CD53	CD53 molecule [Source:HGNC Symbol;Acc:1686]	1	p13.3	1	111415775	111442550	ENSG00000143119	-	1035	7	994	5	29	96.28	0.68	16.771	1.78e-25	0.324247
Correlated	CD55	CD55 molecule, decay accelerating factor for complement (Cromer blood group) [Source:HGNC Symbol;Acc:2665]	LRG_127		1	5001	44495	LRG_127	-	962	9	922	11	20	89.49	0.94	14.928	1.3e-28	0.357786
Correlated	CD69	CD69 molecule [Source:HGNC Symbol;Acc:1694]	12	p13.31	-1	9905082	9913497	ENSG00000110848	-	928	7	889	8	24	86.33	0.75	13.97	4.75e-21	0.309052
Correlated	CD79A	CD79a molecule, immunoglobulin-associated alpha [Source:HGNC Symbol;Acc:1698]	LRG_42		1	5001	9250	LRG_42	-	949	7	916	4	22	88.28	0.74	20.824	7.78e-32	0.381155
Correlated	CD81	CD81 molecule [Source:HGNC Symbol;Acc:1701]	LRG_142		1	5001	25103	LRG_142	-	942	6	907	6	23	87.63	0.64	16.241	2.79e-21	0.308558
Correlated	CD93	CD93 molecule [Source:HGNC Symbol;Acc:15855]	20	p11.21	-1	23059986	23066977	ENSG00000125810	-	966	9	926	11	20	89.86	0.93	14.99	9.77e-29	0.357854
Correlated	CD99	CD99 molecule [Source:HGNC Symbol;Acc:7082]	X	p22.33	1	2609220	2659350	ENSG00000002586	+	952	7	919	2	24	88.56	0.74	23.885	1.04e-36	0.410179
Correlated	CDADC1	cytidine and dCMP deaminase domain containing 1 [Source:HGNC Symbol;Acc:20299]	13	q14.2	1	49822047	49867618	ENSG00000102543	-	1052	5	1013	2	32	97.86	0.48	20.309	1.29e-22	0.301728
Correlated	CDC14B	cell division cycle 14B [Source:HGNC Symbol;Acc:1719]	9	q22.33	-1	99252523	99382112	ENSG00000081377	+	1063	11	1007	19	26	98.88	1.03	10.534	8.32e-24	0.308549
Correlated	CDC20	cell division cycle 20 [Source:HGNC Symbol;Acc:1723]	1	p34.2	1	43824626	43828874	ENSG00000117399	+	947	12	906	13	16	88.09	1.27	16.234	2.2e-41	0.437873
Correlated	CDC25A	cell division cycle 25A [Source:HGNC Symbol;Acc:1725]	3	p21.31	-1	48198636	48229892	ENSG00000164045	+	960	13	916	13	18	89.3	1.35	15.484	1.38e-42	0.441439
Correlated	CDC25C	cell division cycle 25C [Source:HGNC Symbol;Acc:1727]	5	q31.2	-1	137620954	137674044	ENSG00000158402	+	952	9	913	9	21	88.56	0.95	15.867	1.54e-30	0.372282
Correlated	CDC27	cell division cycle 27 [Source:HGNC Symbol;Acc:1728]	17	q21.32	-1	45195069	45266788	ENSG00000004897	-	977	7	941	5	24	90.88	0.72	18.384	5.38e-28	0.350931
Correlated	CDC42	cell division cycle 42 [Source:HGNC Symbol;Acc:1736]	1	p36.12	1	22379120	22419437	ENSG00000070831	-	927	8	891	7	21	86.23	0.86	17.048	2.04e-29	0.36986
Correlated	CDC42EP2	CDC42 effector protein (Rho GTPase binding) 2 [Source:HGNC Symbol;Acc:16263]	11	q13.1	1	65082289	65089900	ENSG00000149798	-	963	8	923	12	20	89.58	0.83	13.757	1.92e-23	0.321504
Correlated	CDC42EP3	CDC42 effector protein (Rho GTPase binding) 3 [Source:HGNC Symbol;Acc:16943]	2	p22.2	-1	37869032	37965611	ENSG00000163171	-	1068	11	1016	15	26	99.35	1.03	12.212	5.65e-28	0.335513
Correlated	CDC42EP4	CDC42 effector protein (Rho GTPase binding) 4 [Source:HGNC Symbol;Acc:17147]	17	q25.1	-1	71279763	71308314	ENSG00000179604	+	965	12	926	10	17	89.77	1.24	18.15	0	0.461097
Correlated	CDC45	cell division cycle 45 [Source:HGNC Symbol;Acc:1739]	22	q11.21	1	19466982	19508135	ENSG00000093009	+	963	7	926	9	21	89.58	0.73	15.047	1.07e-22	0.315964
Correlated	CDC73	cell division cycle 73 [Source:HGNC Symbol;Acc:16783]	LRG_507		1	5001	137858	LRG_507	+	1070	8	1025	7	30	99.53	0.75	15.018	9.46e-26	0.320733
Correlated	CDCA2	cell division cycle associated 2 [Source:HGNC Symbol;Acc:14623]	8	p21.2	1	25316513	25365436	ENSG00000184661	+	1031	19	984	11	17	95.91	1.84	18.138	0	0.564342
Correlated	CDCA3	cell division cycle associated 3 [Source:HGNC Symbol;Acc:14624]	HG344_PATCH	p13.31	-1	6953957	6961230	ENSG00000268136	+	1047	14	998	14	21	97.4	1.34	14.957	4.62e-44	0.430261
Correlated	CDCA7	cell division cycle associated 7 [Source:HGNC Symbol;Acc:14628]	2	q31.1	1	174219548	174233725	ENSG00000144354	+	1059	12	1007	16	24	98.51	1.13	12.607	1.67e-31	0.35883
Correlated	CDCA7L	cell division cycle associated 7-like [Source:HGNC Symbol;Acc:30777]	7	p15.3	-1	21940518	21985702	ENSG00000164649	+	1044	8	1003	6	27	97.12	0.77	17.045	2.14e-29	0.348394
Correlated	CDCA8	cell division cycle associated 8 [Source:HGNC Symbol;Acc:14629]	1	p34.3	1	38158090	38175391	ENSG00000134690	+	954	12	917	9	16	88.74	1.26	19.469	0	0.481831
Correlated	CDH1	cadherin 1, type 1, E-cadherin (epithelial) [Source:HGNC Symbol;Acc:1748]	LRG_301		1	5001	103250	LRG_301	+	916	8	878	7	23	85.21	0.87	15.759	3.96e-27	0.356413
Correlated	CDH13	cadherin 13, H-cadherin (heart) [Source:HGNC Symbol;Acc:1753]	16	q23.3	1	82660408	83830204	ENSG00000140945	-	965	7	929	6	23	89.77	0.73	17.321	2.62e-26	0.341619
Correlated	CDH17	cadherin 17, LI cadherin (liver-intestine) [Source:HGNC Symbol;Acc:1756]	8	q22.1	-1	95139399	95229531	ENSG00000079112	+	922	6	887	5	24	85.77	0.65	16.764	5.12e-22	0.317667
Correlated	CDH19	cadherin 19, type 2 [Source:HGNC Symbol;Acc:1758]	18	q22.1	-1	64168320	64271375	ENSG00000071991	-	1037	10	994	6	27	96.47	0.96	17.517	1.49e-37	0.397719
Correlated	CDH2	cadherin 2, type 1, N-cadherin (neuronal) [Source:HGNC Symbol;Acc:1759]	18	q12.1	-1	25530930	25757410	ENSG00000170558	-	956	9	913	12	22	88.93	0.94	13.217	3.65e-25	0.335169
Correlated	CDH22	cadherin 22, type 2 [Source:HGNC Symbol;Acc:13251]	20	q13.12	-1	44802372	44937137	ENSG00000149654	-	951	7	915	5	24	88.47	0.74	17.895	3.03e-27	0.350596
Correlated	CDH24	cadherin 24, type 2 [Source:HGNC Symbol;Acc:14265]	14	q11.2	-1	23516271	23526747	ENSG00000139880	-	1048	6	1011	2	29	97.49	0.57	22.457	9.95e-30	0.349808
Correlated	CDH5	cadherin 5, type 2 (vascular endothelium) [Source:HGNC Symbol;Acc:1764]	16	q21	1	66400533	66438686	ENSG00000179776	-	966	7	931	4	24	89.86	0.72	19.83	2.74e-30	0.367975
Correlated	CDH6	cadherin 6, type 2, K-cadherin (fetal kidney) [Source:HGNC Symbol;Acc:1765]	5	p13.3	1	31193857	31329253	ENSG00000113361	+	1041	10	995	11	25	96.84	0.96	14.163	6.13e-30	0.352296
Correlated	CDH8	cadherin 8, type 2 [Source:HGNC Symbol;Acc:1767]	16	q21	-1	61681146	62070939	ENSG00000150394	-	1020	6	985	0	29	94.88	0.59	29.143	7.95e-39	0.408076
Correlated	CDH9	cadherin 9, type 2 (T1-cadherin) [Source:HGNC Symbol;Acc:1768]	5	p14.1	-1	26880709	27121257	ENSG00000113100	-	943	6	911	3	23	87.72	0.64	21.678	1.21e-28	0.361564
Correlated	CDIP1	cell death-inducing p53 target 1 [UniGene: NA]						unknown	-	1065	9	1027	3	26	99.07	0.85	22.821	1.26e-44	0.429413
Correlated	CDK1	cyclin-dependent kinase 1 [Source:HGNC Symbol;Acc:1722]	10	q21.2	1	62538089	62554610	ENSG00000170312	+	1073	18	1008	27	20	99.81	1.68	11.295	1.21e-41	0.412712
Correlated	CDK20	cyclin-dependent kinase 20 [Source:HGNC Symbol;Acc:21420]	9	q22.1	-1	90581356	90589668	ENSG00000156345	-	948	5	916	3	24	88.19	0.53	20.431	1.08e-22	0.318433
Correlated	CDK4	cyclin-dependent kinase 4 [Source:HGNC Symbol;Acc:1773]	LRG_490		1	5000	9162	LRG_490	+	955	7	920	4	24	88.84	0.73	19.604	6.07e-30	0.367844
Correlated	CDK5	cyclin-dependent kinase 5 [Source:HGNC Symbol;Acc:1774]	7	q36.1	-1	150750899	150755617	ENSG00000164885	-	953	9	912	10	22	88.65	0.94	14.562	6.69e-28	0.354684
Correlated	CDK5R2	cyclin-dependent kinase 5, regulatory subunit 2 (p39) [Source:HGNC Symbol;Acc:1776]	2	q35	1	219824377	219826876	ENSG00000171450	-	945	5	915	1	24	87.91	0.53	27.155	2.77e-30	0.372007
Correlated	CDKL2	cyclin-dependent kinase-like 2 (CDC2-related kinase) [Source:HGNC Symbol;Acc:1782]	4	q21.1	-1	76503215	76555900	ENSG00000138769	-	1031	7	990	4	30	95.91	0.68	17.732	5.07e-27	0.335241
Correlated	CDKN1A	cyclin-dependent kinase inhibitor 1A (p21, Cip1) [Source:HGNC Symbol;Acc:1784]	6	p21.2	1	36644305	36655116	ENSG00000124762	-	964	8	922	13	21	89.67	0.83	12.663	1.78e-21	0.306529
Correlated	CDKN2A	cyclin-dependent kinase inhibitor 2A [Source:HGNC Symbol;Acc:1787]	9	p21.3	-1	21967751	21995300	ENSG00000147889	+	950	11	902	18	19	88.37	1.16	12.011	1.51e-27	0.352844
Correlated	CDKN2C	cyclin-dependent kinase inhibitor 2C (p18, inhibits CDK4) [Source:HGNC Symbol;Acc:1789]	1	p32.3	1	51426417	51440305	ENSG00000123080	+	957	9	913	13	22	89.02	0.94	12.629	5.71e-24	0.326381
Correlated	CDKN2D	cyclin-dependent kinase inhibitor 2D (p19, inhibits CDK4) [Source:HGNC Symbol;Acc:1790]	19	p13.2	-1	10677138	10679735	ENSG00000129355	-	952	7	917	6	22	88.56	0.74	17.676	7.25e-27	0.347808
Correlated	CDKN3	cyclin-dependent kinase inhibitor 3 [Source:HGNC Symbol;Acc:1791]	14	q22.2	1	54863567	54886936	ENSG00000100526	+	935	11	890	16	18	86.98	1.18	13.135	2.4e-30	0.374392
Correlated	CDS1	CDP-diacylglycerol synthase (phosphatidate cytidylyltransferase) 1 [Source:HGNC Symbol;Acc:1800]	4	q21.23	1	85504132	85572491	ENSG00000163624	+	1063	9	1019	6	29	98.88	0.85	16.784	2.04e-32	0.363595
Correlated	CDSN	corneodesmosin [Source:HGNC Symbol;Acc:1802]	HSCHR6_MHC_MCF	p21.33	-1	31161395	31166747	ENSG00000237165	-	934	4	904	2	24	86.88	0.43	22.238	4.52e-20	0.300215
Correlated	CDYL	chromodomain protein, Y-like [Source:HGNC Symbol;Acc:1811]	6	p25.1	1	4706393	4955785	ENSG00000153046	+	918	11	880	8	19	85.4	1.2	17.716	9.96e-42	0.446661
Correlated	CECR1	cat eye syndrome chromosome region, candidate 1 [Source:HGNC Symbol;Acc:1839]	22	q11.1	-1	17660194	17702879	ENSG00000093072	-	965	8	926	8	23	89.77	0.83	15.565	9.88e-27	0.344533
Correlated	CECR2	cat eye syndrome chromosome region, candidate 2 [Source:HGNC Symbol;Acc:1840]	22	q11.1	1	17840837	18033845	ENSG00000099954	-	990	7	950	5	28	92.09	0.71	16.5	4.55e-25	0.328689
Correlated	CEL	carboxyl ester lipase [Source:HGNC Symbol;Acc:1848]	9	q34.2	1	135937365	135947248	ENSG00000170835	-	906	8	864	13	21	84.28	0.88	11.901	3.87e-20	0.305367
Correlated	CELA2B	chymotrypsin-like elastase family, member 2B [Source:HGNC Symbol;Acc:29995]	1	p36.21	1	15792404	15817895	ENSG00000215704	-	905	4	876	1	24	84.19	0.44	25.857	2.3e-23	0.33105
Correlated	CELF2	CUGBP, Elav-like family member 2 [Source:HGNC Symbol;Acc:2550]	10	p14	1	11047259	11378666	ENSG00000048740	-	1062	15	1007	17	23	98.79	1.41	13.1	6.98e-41	0.410861
Correlated	CELF3	CUGBP, Elav-like family member 3 [Source:HGNC Symbol;Acc:11967]	1	q21.3	-1	151674880	151689290	ENSG00000159409	-	955	7	923	3	22	88.84	0.73	23.052	2.43e-35	0.40144
Correlated	CELF4	CUGBP, Elav-like family member 4 [Source:HGNC Symbol;Acc:14015]	18	q12.2	-1	34823010	35146000	ENSG00000101489	-	1043	9	1000	5	29	97.02	0.86	17.645	3.42e-34	0.377522
Correlated	CELF5	CUGBP, Elav-like family member 5 [Source:HGNC Symbol;Acc:14058]	19	p13.3	1	3224701	3297074	ENSG00000161082	-	1029	8	991	3	27	95.72	0.78	21.382	3e-37	0.397563
Correlated	CELP	carboxyl ester lipase pseudogene [Source:HGNC Symbol;Acc:1849]	9	q34.2	1	135957926	135962742	ENSG00000170827	-	834	7	797	10	20	77.58	0.84	12.719	4.28e-19	0.309206
Correlated	CELSR1	cadherin, EGF LAG seven-pass G-type receptor 1 [Source:HGNC Symbol;Acc:1850]	22	q13.31	-1	46756731	46933067	ENSG00000075275	+	946	13	908	9	16	88	1.37	19.276	0	0.501496
Correlated	CELSR2	cadherin, EGF LAG seven-pass G-type receptor 2 [Source:HGNC Symbol;Acc:3231]	1	p13.3	1	109792641	109818372	ENSG00000143126	+	947	10	902	14	21	88.09	1.06	12.728	9.47e-27	0.347921
Correlated	CENPA	centromere protein A [Source:HGNC Symbol;Acc:1851]	2	p23.3	1	26987157	27023935	ENSG00000115163	+	974	16	926	17	15	90.6	1.64	15.234	0	0.483284
Correlated	CENPE	centromere protein E, 312kDa [Source:HGNC Symbol;Acc:1856]	4	q24	-1	104026963	104119566	ENSG00000138778	+	943	13	898	16	16	87.72	1.38	14.577	6.03e-40	0.43077
Correlated	CENPF	centromere protein F, 350/400kDa [Source:HGNC Symbol;Acc:1857]	1	q41	1	214776538	214837931	ENSG00000117724	+	966	15	916	21	14	89.86	1.55	13.879	1.18e-43	0.445791
Correlated	CENPH	centromere protein H [Source:HGNC Symbol;Acc:17268]	5	q13.2	1	68485375	68506184	ENSG00000153044	+	1044	6	1006	2	30	97.12	0.57	21.75	8.56e-29	0.344591
Correlated	CENPK	centromere protein K [Source:HGNC Symbol;Acc:29479]	5	q12.3	-1	64813593	64858998	ENSG00000123219	+	1041	14	989	16	22	96.84	1.34	13.494	1.87e-39	0.407352
Correlated	CENPM	centromere protein M [Source:HGNC Symbol;Acc:18352]	22	q13.2	-1	42334725	42343168	ENSG00000100162	+	944	12	906	9	17	87.81	1.27	18.601	0	0.472644
Correlated	CENPN	centromere protein N [Source:HGNC Symbol;Acc:30873]	16	q23.2	1	81040103	81066719	ENSG00000166451	+	1065	13	1009	18	25	99.07	1.22	11.753	1.47e-31	0.358142
Correlated	CENPW	centromere protein W [Source:HGNC Symbol;Acc:21488]	6	q22.32	1	126661320	126670021	ENSG00000203760	+	1008	13	956	15	24	93.77	1.29	12.649	3e-34	0.384355
Correlated	CEP112	centrosomal protein 112kDa [Source:HGNC Symbol;Acc:28514]	17	q24.1	-1	63631656	64188202	ENSG00000154240	-	937	6	902	6	23	87.16	0.64	16.155	3.63e-21	0.308487
Correlated	CEP135	centrosomal protein 135kDa [Source:HGNC Symbol;Acc:29086]	4	q12	1	56815037	56899529	ENSG00000174799	+	1074	12	1023	13	26	99.91	1.12	13.566	4.17e-34	0.371537
Correlated	CEP170B	centrosomal protein 170B [UniGene: NA]						unknown	-	943	8	913	1	21	87.72	0.85	28.904	0	0.487914
Correlated	CEP44	centrosomal protein 44kDa [Source:HGNC Symbol;Acc:29356]	4	q34.1	1	175204828	175254531	ENSG00000164118	+	969	7	928	5	29	90.14	0.72	15.701	7.79e-24	0.323373
Correlated	CEP55	centrosomal protein 55kDa [Source:HGNC Symbol;Acc:1161]	10	q23.33	1	95256389	95288849	ENSG00000138180	+	963	11	915	17	20	89.58	1.14	12.204	5.15e-28	0.353603
Correlated	CEP57L1	centrosomal protein 57kDa-like 1 [Source:HGNC Symbol;Acc:21561]	6	q21	1	109416313	109485135	ENSG00000183137	-	1053	6	1015	3	29	97.95	0.57	20.057	1.81e-26	0.328087
Correlated	CEP70	centrosomal protein 70kDa [Source:HGNC Symbol;Acc:29972]	3	q22.3	-1	138213186	138313380	ENSG00000114107	-	1065	9	1019	8	29	99.07	0.85	14.837	1.89e-28	0.339006
Correlated	CEP72	centrosomal protein 72kDa [Source:HGNC Symbol;Acc:25547]	5	p15.33	1	612387	667283	ENSG00000112877	+	942	4	912	1	25	87.63	0.42	25.986	1.79e-23	0.325296
Correlated	CEP95	centrosomal protein 95kDa [Source:HGNC Symbol;Acc:25141]	HG183_PATCH	q23.3	1	62584096	62615309	ENSG00000263046	+	1066	8	1022	7	29	99.16	0.75	15.366	2.27e-26	0.325436
Correlated	CERK	ceramide kinase [Source:HGNC Symbol;Acc:19256]	22	q13.31	-1	47080308	47134158	ENSG00000100422	-	947	7	909	9	22	88.09	0.74	14.287	1.62e-21	0.309584
Correlated	CERS4	ceramide synthase 4 [Source:HGNC Symbol;Acc:23747]	19	p13.2	1	8271620	8327305	ENSG00000090661	-	909	7	871	7	24	84.56	0.77	14.661	3.68e-22	0.321054
Correlated	CERS5	ceramide synthase 5 [Source:HGNC Symbol;Acc:23749]	12	q13.12	-1	50523575	50561288	ENSG00000139624	-	1047	7	1011	0	29	97.4	0.67	29.083	5.61e-45	0.434767
Correlated	CERS6	ceramide synthase 6 [Source:HGNC Symbol;Acc:23826]	2	q24.3	1	169312372	169631644	ENSG00000172292	+	1066	10	1013	15	28	99.16	0.94	11.221	2.71e-23	0.304534
Correlated	CES1	carboxylesterase 1 [Source:HGNC Symbol;Acc:1863]	HSCHR16_1_CTG3_1	q12.2	-1	55849157	55879488	ENSG00000262243	-	925	6	890	6	23	86.05	0.65	15.948	6.79e-21	0.308313
Correlated	CES2	carboxylesterase 2 [Source:HGNC Symbol;Acc:1864]	16	q22.1	1	66968347	66978999	ENSG00000172831	-	950	7	915	6	22	88.37	0.74	17.639	8.26e-27	0.34778
Correlated	CES4A	carboxylesterase 4A [Source:HGNC Symbol;Acc:26741]	16	q22.1	1	67022492	67043661	ENSG00000172824	-	1015	9	969	11	26	94.42	0.89	13.05	8.15e-25	0.322858
Correlated	CFDP1	craniofacial development protein 1 [Source:HGNC Symbol;Acc:1873]	16	q23.1	-1	75327596	75467383	ENSG00000153774	+	1050	5	1014	1	30	97.67	0.48	25	6.8e-28	0.337861
Correlated	CFH	complement factor H [Source:HGNC Symbol;Acc:4883]	LRG_47		1	4868	100494	LRG_47	-	928	8	885	12	23	86.33	0.86	11.974	2.87e-20	0.302781
Correlated	CFI	complement factor I [Source:HGNC Symbol;Acc:5394]	LRG_48		1	4807	66294	LRG_48	+	966	10	925	12	19	89.86	1.04	15.141	3.73e-32	0.379784
Correlated	CFP	complement factor properdin [Source:HGNC Symbol;Acc:8864]	LRG_129		1	5001	11093	LRG_129	-	925	5	895	2	23	86.05	0.54	23.597	2.88e-26	0.348626
Correlated	CGNL1	cingulin-like 1 [Source:HGNC Symbol;Acc:25931]	15	q21.3	1	57668165	57842925	ENSG00000128849	-	1056	10	1004	16	26	98.23	0.95	11.282	2e-23	0.306901
Correlated	CGREF1	cell growth regulator with EF-hand domain 1 [Source:HGNC Symbol;Acc:16962]	2	p23.3	-1	27321757	27341995	ENSG00000138028	-	934	6	902	2	24	86.88	0.64	23.35	6.16e-31	0.378437
Correlated	CHAC1	ChaC, cation transport regulator homolog 1 (E. coli) [Source:HGNC Symbol;Acc:28680]	15	q15.1	1	41245160	41248710	ENSG00000128965	-	930	10	891	9	20	86.51	1.08	16.316	7.51e-35	0.403828
Correlated	CHD3	chromodomain helicase DNA binding protein 3 [Source:HGNC Symbol;Acc:1918]	17	p13.1	1	7788124	7816078	ENSG00000170004	-	906	9	872	5	20	84.28	0.99	20.084	3.96e-39	0.434755
Correlated	CHD4	chromodomain helicase DNA binding protein 4 [Source:HGNC Symbol;Acc:1919]	12	p13.31	-1	6679249	6716642	ENSG00000111642	+	955	5	922	2	26	88.84	0.52	22.005	1.67e-24	0.330601
Correlated	CHD4	chromodomain helicase DNA binding protein 4 [Source:HGNC Symbol;Acc:1919]	12	p13.31	-1	6679249	6716642	ENSG00000111642	-	955	6	921	3	25	88.84	0.63	20.538	3.97e-27	0.349054
Correlated	CHD5	chromodomain helicase DNA binding protein 5 [Source:HGNC Symbol;Acc:16816]	1	p36.31	-1	6161853	6240183	ENSG00000116254	-	929	7	897	3	22	86.42	0.75	22.424	2.22e-34	0.401165
Correlated	CHD7	chromodomain helicase DNA binding protein 7 [Source:HGNC Symbol;Acc:20626]	LRG_176		1	5001	193127	LRG_176	+	1074	11	1022	14	27	99.91	1.02	12.436	1.56e-28	0.338112
Correlated	CHD9	chromodomain helicase DNA binding protein 9 [Source:HGNC Symbol;Acc:25701]	16	q12.2	1	53088945	53363062	ENSG00000177200	+	1075	10	1026	11	28	100	0.93	13.471	2.23e-28	0.336976
Correlated	CHDH	choline dehydrogenase [Source:HGNC Symbol;Acc:24288]	3	p21.1	-1	53850387	53880417	ENSG00000016391	-	1048	12	994	16	26	97.49	1.15	11.82	2.15e-29	0.347712
Correlated	CHEK1	checkpoint kinase 1 [Source:HGNC Symbol;Acc:1925]	11	q24.2	1	125495036	125546150	ENSG00000149554	+	1069	11	1022	12	24	99.44	1.03	14.607	6.66e-34	0.371235
Correlated	CHFR	checkpoint with forkhead and ring finger domains, E3 ubiquitin protein ligase [Source:HGNC Symbol;Acc:20455]	12	q24.33	-1	133398773	133532890	ENSG00000072609	-	1052	5	1014	1	32	97.86	0.48	23.694	1.87e-26	0.328158
Correlated	CHGA	chromogranin A (parathyroid secretory protein 1) [Source:HGNC Symbol;Acc:1929]	14	q32.12	1	93389425	93401638	ENSG00000100604	-	937	7	904	2	24	87.16	0.75	23.509	3.91e-36	0.410034
Correlated	CHGB	chromogranin B (secretogranin 1) [Source:HGNC Symbol;Acc:1930]	20	p12.3	1	5892076	5906007	ENSG00000089199	-	920	8	882	7	23	85.58	0.87	15.828	3e-27	0.356478
Correlated	CHL1	cell adhesion molecule L1-like [Source:HGNC Symbol;Acc:1939]	3	p26.3	1	238279	451090	ENSG00000134121	-	1048	10	1000	10	28	97.49	0.95	13.789	4e-29	0.346021
Correlated	CHML	choroideremia-like (Rab escort protein 2) [Source:HGNC Symbol;Acc:1941]	1	q43	-1	241792155	241799232	ENSG00000203668	+	1059	11	1007	15	26	98.51	1.04	12.109	1e-27	0.335346
Correlated	CHMP1A	charged multivesicular body protein 1A [Source:HGNC Symbol;Acc:8740]	16	q24.3	-1	89710839	89724253	ENSG00000131165	+	975	5	942	2	26	90.7	0.51	22.465	5.22e-25	0.330785
Correlated	CHMP6	charged multivesicular body protein 6 [Source:HGNC Symbol;Acc:25675]	17	q25.3	1	78965398	78983317	ENSG00000176108	+	919	5	889	1	24	85.49	0.54	26.408	1.82e-29	0.371805
Correlated	CHN1	chimerin 1 [Source:HGNC Symbol;Acc:1943]	2	q31.1	-1	175664091	175870097	ENSG00000128656	-	966	11	921	14	20	89.86	1.14	13.711	9.48e-32	0.37725
Correlated	CHN2	chimerin 2 [Source:HGNC Symbol;Acc:1944]	7	p14.3	1	29161956	29553944	ENSG00000106069	-	969	14	920	18	17	90.14	1.44	13.675	4.17e-40	0.42584
Correlated	CHRD	chordin [Source:HGNC Symbol;Acc:1949]	3	q27.1	1	184097861	184108524	ENSG00000090539	-	937	3	906	0	28	87.16	0.32	30.226	6.68e-21	0.306387
Correlated	CHRDL1	chordin-like 1 [Source:HGNC Symbol;Acc:29861]	X	q23	-1	109917084	110039286	ENSG00000101938	-	916	13	877	10	16	85.21	1.42	17.853	0	0.489051
Correlated	CHRM1	cholinergic receptor, muscarinic 1 [Source:HGNC Symbol;Acc:1950]	11	q12.3	-1	62676151	62689279	ENSG00000168539	-	1014	6	975	4	29	94.33	0.59	17.383	7.25e-23	0.309147
Correlated	CHRM3	cholinergic receptor, muscarinic 3 [Source:HGNC Symbol;Acc:1952]	1	q43	1	239549865	240078750	ENSG00000133019	-	1026	12	980	11	23	95.44	1.17	15.294	8.24e-39	0.406796
Correlated	CHRNA7	cholinergic receptor, nicotinic, alpha 7 (neuronal) [Source:HGNC Symbol;Acc:1960]	15	q13.3	1	32322691	32464722	ENSG00000175344	-	907	6	873	5	23	84.37	0.66	17.06	2.05e-22	0.323391
Correlated	CHRNB2	cholinergic receptor, nicotinic, beta 2 (neuronal) [Source:HGNC Symbol;Acc:1962]	1	q21.3	1	154540257	154552502	ENSG00000160716	-	1042	8	1003	3	28	96.93	0.77	21.051	1.17e-36	0.391782
Correlated	CHST11	carbohydrate (chondroitin 4) sulfotransferase 11 [Source:HGNC Symbol;Acc:17422]	12	q23.3	1	104849073	105155792	ENSG00000171310	+	1060	13	1000	22	25	98.6	1.23	10.361	1.8e-27	0.333546
Correlated	CHST15	carbohydrate (N-acetylgalactosamine 4-sulfate 6-O) sulfotransferase 15 [Source:HGNC Symbol;Acc:18137]	10	q26.13	-1	125767184	125853206	ENSG00000182022	-	1068	10	1019	11	28	99.35	0.94	13.383	3.47e-28	0.336862
Correlated	CHST3	carbohydrate (chondroitin 6) sulfotransferase 3 [Source:HGNC Symbol;Acc:1971]	10	q22.1	1	73724123	73773322	ENSG00000122863	-	955	6	920	6	23	88.84	0.63	16.466	1.41e-21	0.30874
Correlated	CHST7	carbohydrate (N-acetylglucosamine 6-O) sulfotransferase 7 [Source:HGNC Symbol;Acc:13817]	X	p11.23	1	46433219	46457843	ENSG00000147119	-	959	6	928	2	23	89.21	0.63	24.802	7.5e-33	0.385497
Correlated	CHSY3	chondroitin sulfate synthase 3 [Source:HGNC Symbol;Acc:24293]	5	q23.3	1	129240165	129522327	ENSG00000198108	-	1001	6	963	4	28	93.12	0.6	17.665	3.04e-23	0.313897
Correlated	CHTOP	chromatin target of PRMT1 [Source:HGNC Symbol;Acc:24511]	1	q21.3	1	153606525	153618782	ENSG00000160679	+	976	8	942	2	24	90.79	0.82	24.4	1.1e-42	0.438345
Correlated	CHURC1	churchill domain containing 1 [Source:HGNC Symbol;Acc:20099]	14	q23.3	1	65381079	65411309	ENSG00000258289	+	1043	8	1003	5	27	97.02	0.77	18.338	9.81e-32	0.362967
Correlated	CIB2	calcium and integrin binding family member 2 [Source:HGNC Symbol;Acc:24579]	15	q25.1	-1	78396948	78423886	ENSG00000136425	-	972	5	939	2	26	90.42	0.51	22.396	6.22e-25	0.330758
Correlated	CIB3	calcium and integrin binding family member 3 [Source:HGNC Symbol;Acc:24580]	19	p13.12	-1	16272179	16284336	ENSG00000141977	-	894	4	865	1	24	83.16	0.45	25.543	4.34e-23	0.330963
Correlated	CIDEC	cell death-inducing DFFA-like effector c [Source:HGNC Symbol;Acc:24229]	3	p25.3	-1	9908398	9921938	ENSG00000187288	-	929	6	899	1	23	86.42	0.65	27.458	1.78e-36	0.413829
Correlated	CILP	cartilage intermediate layer protein, nucleotide pyrophosphohydrolase [Source:HGNC Symbol;Acc:1980]	15	q22.31	-1	65488337	65503826	ENSG00000138615	-	944	4	914	1	25	87.81	0.42	26.041	1.6e-23	0.325311
Correlated	CILP2	cartilage intermediate layer protein 2 [Source:HGNC Symbol;Acc:24213]	19	p13.11	1	19649057	19657468	ENSG00000160161	-	916	3	888	0	25	85.21	0.33	32.714	1.51e-22	0.322814
Correlated	CISH	cytokine inducible SH2-containing protein [Source:HGNC Symbol;Acc:1984]	3	p21.2	-1	50643921	50649262	ENSG00000114737	-	1067	10	1021	9	27	99.26	0.94	15.178	3.12e-32	0.361816
Correlated	CIT	citron (rho-interacting, serine/threonine kinase 21) [Source:HGNC Symbol;Acc:1985]	12	q24.23	-1	120123595	120315095	ENSG00000122966	+	1063	9	1018	9	27	98.88	0.85	14.764	2.84e-28	0.338209
Correlated	CKAP2	cytoskeleton associated protein 2 [Source:HGNC Symbol;Acc:1990]	13	q14.3	1	53029564	53050763	ENSG00000136108	+	1045	10	1003	7	25	97.21	0.96	17.563	1.31e-37	0.396498
Correlated	CKAP2L	cytoskeleton associated protein 2-like [Source:HGNC Symbol;Acc:26877]	2	q13	-1	113493930	113522254	ENSG00000169607	+	1021	11	979	8	23	94.98	1.08	17.385	7.79e-41	0.418776
Correlated	CKLF	chemokine-like factor [Source:HGNC Symbol;Acc:13253]	16	q21	1	66586466	66600331	ENSG00000217555	+	1063	9	1021	7	26	98.88	0.85	17.084	5.66e-33	0.366873
Correlated	CKMT1B	creatine kinase, mitochondrial 1B [Source:HGNC Symbol;Acc:1995]	15	q15.3	1	43885252	43897099	ENSG00000237289	+	896	6	863	6	21	83.35	0.67	16.593	9.21e-22	0.320225
Correlated	CKS2	CDC28 protein kinase regulatory subunit 2 [Source:HGNC Symbol;Acc:2000]	9	q22.2	1	91926113	91931618	ENSG00000123975	+	956	12	903	22	19	88.93	1.26	10.884	6.34e-27	0.347478
Correlated	CLCC1	chloride channel CLIC-like 1 [Source:HGNC Symbol;Acc:29675]	1	p13.3	-1	109472130	109506111	ENSG00000121940	-	975	6	940	4	25	90.7	0.62	18.871	7.5e-25	0.32967
Correlated	CLCN3	chloride channel, voltage-sensitive 3 [Source:HGNC Symbol;Acc:2021]	4	q33	1	170533784	170644824	ENSG00000109572	+	976	8	938	7	23	90.79	0.82	16.791	6.16e-29	0.35733
Correlated	CLDN10	claudin 10 [Source:HGNC Symbol;Acc:2033]	13	q32.1	1	96085858	96232013	ENSG00000134873	-	951	9	912	8	22	88.47	0.95	16.241	2.59e-31	0.377443
Correlated	CLDN11	claudin 11 [Source:HGNC Symbol;Acc:8514]	3	q26.2	1	170136653	170578169	ENSG00000013297	-	1043	12	984	24	23	97.02	1.15	9.9333	2.85e-24	0.314741
Correlated	CLDN17	claudin 17 [Source:HGNC Symbol;Acc:2038]	21	q22.11	-1	31538241	31538971	ENSG00000156282	-	918	4	890	0	24	85.4	0.44	32.786	1.31e-29	0.372969
Correlated	CLDN4	claudin 4 [Source:HGNC Symbol;Acc:2046]	HG1257_PATCH	q11.23	1	73264499	73297641	ENSG00000262988	-	956	6	921	4	25	88.93	0.63	18.503	2.29e-24	0.329445
Correlated	CLDN5	claudin 5 [Source:HGNC Symbol;Acc:2047]	22	q11.21	-1	19510547	19515068	ENSG00000184113	-	945	7	915	1	22	87.91	0.74	28.513	5.89e-44	0.452338
Correlated	CLEC1A	C-type lectin domain family 1, member A [Source:HGNC Symbol;Acc:24355]	12	p13.2	-1	10222153	10264226	ENSG00000150048	-	934	6	902	3	23	86.88	0.64	21.471	2.27e-28	0.361468
Correlated	CLEC1B	C-type lectin domain family 1, member B [Source:HGNC Symbol;Acc:24356]	12	p13.2	-1	10138241	10166023	ENSG00000165682	+	946	6	912	3	25	88	0.63	20.344	7.14e-27	0.348955
Correlated	CLEC2L	C-type lectin domain family 2, member L [Source:HGNC Symbol;Acc:21969]	7	q34	1	139208602	139229730	ENSG00000236279	-	987	5	953	0	29	91.81	0.51	29.029	1.73e-32	0.377778
Correlated	CLEC3B	C-type lectin domain family 3, member B [Source:HGNC Symbol;Acc:11891]	3	p21.31	1	45043040	45077563	ENSG00000163815	-	929	9	890	10	20	86.42	0.97	15.174	3.82e-29	0.367649
Correlated	CLEC5A	C-type lectin domain family 5, member A [Source:HGNC Symbol;Acc:2054]	HG7_PATCH	q34	-1	141627157	141646807	ENSG00000261180	-	922	5	890	3	24	85.77	0.54	19.871	4.44e-22	0.318151
Correlated	CLIC1	chloride intracellular channel 1 [Source:HGNC Symbol;Acc:2062]	HSCHR6_MHC_COX	p21.33	-1	31685771	31694945	ENSG00000230685	-	947	5	915	3	24	88.09	0.53	20.409	1.14e-22	0.318423
Correlated	CLIC1	chloride intracellular channel 1 [Source:HGNC Symbol;Acc:2062]	HSCHR6_MHC_COX	p21.33	-1	31685771	31694945	ENSG00000230685	+	947	7	915	3	22	88.09	0.74	22.859	4.81e-35	0.401357
Correlated	CLIC1P1	chloride intracellular channel 1 pseudogene 1 [Source:HGNC Symbol;Acc:32691]	12	q24.31	1	121352203	121352926	ENSG00000231313	+	813	4	787	0	22	75.63	0.49	31.269	2.72e-28	0.386862
Correlated	CLIC2	chloride intracellular channel 2 [Source:HGNC Symbol;Acc:2063]	HG1497_PATCH	q28	-1	154483821	154542267	ENSG00000268943	-	952	6	918	2	26	88.56	0.63	22.312	1.47e-29	0.36591
Correlated	CLIC5	chloride intracellular channel 5 [Source:HGNC Symbol;Acc:13517]	6	p21.1	-1	45868045	46048132	ENSG00000112782	-	1050	12	994	19	25	97.67	1.14	10.985	4.03e-27	0.332848
Correlated	CLIP1	CAP-GLY domain containing linker protein 1 [Source:HGNC Symbol;Acc:10461]	12	q24.31	-1	122755979	122907179	ENSG00000130779	-	1068	10	1023	9	26	99.35	0.94	15.614	3.35e-33	0.367342
Correlated	CLIP3	CAP-GLY domain containing linker protein 3 [Source:HGNC Symbol;Acc:24314]	19	q13.12	-1	36505562	36524245	ENSG00000105270	-	1063	9	1020	7	27	98.88	0.85	16.609	5.01e-32	0.361275
Correlated	CLIP4	CAP-GLY domain containing linker protein family, member 4 [Source:HGNC Symbol;Acc:26108]	2	p23.2	1	29320571	29412509	ENSG00000115295	-	1059	14	1006	17	22	98.51	1.32	13.285	9.03e-39	0.400194
Correlated	CLK2	CDC-like kinase 2 [Source:HGNC Symbol;Acc:2069]	HSCHR1_2_CTG31	q22	-1	155248063	155263686	ENSG00000261893	-	964	4	932	1	27	89.67	0.41	24.877	1.71e-22	0.31427
Correlated	CLK4	CDC-like kinase 4 [Source:HGNC Symbol;Acc:13659]	5	q35.3	-1	178029665	178057616	ENSG00000113240	+	1041	15	994	12	20	96.84	1.44	16.524	0	0.472494
Correlated	CLMN	calmin (calponin-like, transmembrane) [Source:HGNC Symbol;Acc:19972]	14	q32.13	-1	95648277	95786243	ENSG00000165959	-	1042	12	984	20	26	96.93	1.15	10.283	3.17e-25	0.321457
Correlated	CLSTN1	calsyntenin 1 [Source:HGNC Symbol;Acc:17447]	1	p36.22	-1	9789084	9884584	ENSG00000171603	-	957	8	923	5	21	89.02	0.84	20.308	2.93e-35	0.400536
Correlated	CLSTN3	calsyntenin 3 [Source:HGNC Symbol;Acc:18371]	12	p13.31	1	7282294	7311541	ENSG00000139182	-	947	6	915	3	23	88.09	0.63	21.77	9.18e-29	0.361607
Correlated	CLTA	clathrin, light chain A [Source:HGNC Symbol;Acc:2090]	9	p13.3	1	36190853	36304778	ENSG00000122705	-	943	5	909	3	26	87.72	0.53	19.012	3.99e-21	0.307176
Correlated	CLTB	clathrin, light chain B [Source:HGNC Symbol;Acc:2091]	5	q35.2	-1	175819456	175843570	ENSG00000175416	-	952	10	914	9	19	88.56	1.05	17.278	5.61e-37	0.411743
Correlated	CLU	clusterin [Source:HGNC Symbol;Acc:2095]	8	p21.1	-1	27454434	27472548	ENSG00000120885	-	948	11	904	14	19	88.19	1.16	13.904	3.06e-32	0.383913
Correlated	CLUL1	clusterin-like 1 (retinal) [Source:HGNC Symbol;Acc:2096]	18	p11.32	1	596988	650334	ENSG00000079101	-	935	6	902	2	25	86.98	0.64	22.621	5.69e-30	0.371943
Correlated	CMTM3	CKLF-like MARVEL transmembrane domain containing 3 [Source:HGNC Symbol;Acc:19174]	16	q21	1	66637777	66647795	ENSG00000140931	+	1045	13	1004	6	22	97.21	1.24	20.429	0	0.492172
Correlated	CMTM3	CKLF-like MARVEL transmembrane domain containing 3 [Source:HGNC Symbol;Acc:19174]	16	q21	1	66637777	66647795	ENSG00000140931	-	1045	9	998	12	26	97.21	0.86	12.796	2.83e-24	0.31446
Correlated	CMTM4	CKLF-like MARVEL transmembrane domain containing 4 [Source:HGNC Symbol;Acc:19175]	16	q22.1	-1	66648653	66730610	ENSG00000183723	-	1058	11	1012	11	24	98.42	1.04	15.114	3.59e-35	0.38044
Correlated	CMTM6	CKLF-like MARVEL transmembrane domain containing 6 [Source:HGNC Symbol;Acc:19177]	3	p22.3	-1	32522804	32544900	ENSG00000091317	-	1037	6	998	4	29	96.47	0.58	17.777	2.2e-23	0.309409
Correlated	CMTM6	CKLF-like MARVEL transmembrane domain containing 6 [Source:HGNC Symbol;Acc:19177]	3	p22.3	-1	32522804	32544900	ENSG00000091317	+	1037	10	990	12	25	96.47	0.96	13.468	2.26e-28	0.343051
Correlated	CNDP1	carnosine dipeptidase 1 (metallopeptidase M20 family) [Source:HGNC Symbol;Acc:20675]	18	q22.3	1	72201675	72254448	ENSG00000150656	-	995	10	955	5	25	92.56	1.01	18.952	8.22e-41	0.424085
Correlated	CNGB1	cyclic nucleotide gated channel beta 1 [Source:HGNC Symbol;Acc:2151]	16	q21	-1	57917503	58005020	ENSG00000070729	-	939	7	906	4	22	87.35	0.75	20.605	1.69e-31	0.381038
Correlated	CNIH2	cornichon homolog 2 (Drosophila) [Source:HGNC Symbol;Acc:28744]	11	q13.2	1	66045661	66052772	ENSG00000174871	-	1028	5	992	1	30	95.63	0.49	24.476	2.55e-27	0.337705
Correlated	CNIH4	cornichon homolog 4 (Drosophila) [Source:HGNC Symbol;Acc:25013]	1	q42.11	1	224544552	224567161	ENSG00000143771	+	1069	12	1019	13	25	99.44	1.12	13.868	6.42e-35	0.377047
Correlated	CNKSR2	connector enhancer of kinase suppressor of Ras 2 [Source:HGNC Symbol;Acc:19701]	X	p22.12	1	21392536	21672813	ENSG00000149970	-	1033	16	986	10	21	96.09	1.55	17.181	0	0.501124
Correlated	CNN1	calponin 1, basic, smooth muscle [Source:HGNC Symbol;Acc:2155]	19	p13.2	1	11649532	11661138	ENSG00000130176	-	966	13	921	14	18	89.86	1.35	15.004	3.59e-41	0.432378
Correlated	CNNM1	cyclin M1 [Source:HGNC Symbol;Acc:102]	10	q24.2	1	101088856	101154087	ENSG00000119946	-	962	8	928	3	23	89.49	0.83	22.569	2.25e-39	0.423292
Correlated	CNNM2	cyclin M2 [Source:HGNC Symbol;Acc:103]	10	q24.32	1	104678074	104838344	ENSG00000148842	-	964	6	929	6	23	89.67	0.62	16.621	8.84e-22	0.308863
Correlated	CNOT6	CCR4-NOT transcription complex, subunit 6 [Source:HGNC Symbol;Acc:14099]	5	q35.3	1	179921412	180005405	ENSG00000113300	+	1068	6	1029	4	29	99.35	0.56	18.309	4.39e-24	0.309744
Correlated	CNP	2',3'-cyclic nucleotide 3' phosphodiesterase [Source:HGNC Symbol;Acc:2158]	HG185_PATCH	q21.2	1	40122993	40131428	ENSG00000260283	-	971	8	931	9	23	90.33	0.82	14.74	3.08e-25	0.333085
Correlated	CNR1	cannabinoid receptor 1 (brain) [Source:HGNC Symbol;Acc:2159]	6	q15	-1	88849583	88876078	ENSG00000118432	-	963	9	920	12	22	89.58	0.93	13.313	2.35e-25	0.3353
Correlated	CNRIP1	cannabinoid receptor interacting protein 1 [Source:HGNC Symbol;Acc:24546]	2	p14	-1	68511303	68547183	ENSG00000119865	-	1057	10	1013	9	25	98.33	0.95	15.895	7.85e-34	0.372923
Correlated	CNTFR	ciliary neurotrophic factor receptor [Source:HGNC Symbol;Acc:2170]	9	p13.3	-1	34551430	34590121	ENSG00000122756	-	947	3	915	0	29	88.09	0.32	29.594	1.75e-20	0.301446
Correlated	CNTLN	centlein, centrosomal protein [Source:HGNC Symbol;Acc:23432]	9	p22.2	1	17134980	17503921	ENSG00000044459	+	1061	12	1012	13	24	98.7	1.13	14.147	1.13e-35	0.382732
Correlated	CNTN1	contactin 1 [Source:HGNC Symbol;Acc:2171]	12	q12	1	41086244	41466220	ENSG00000018236	-	1047	12	990	19	26	97.4	1.15	10.666	2.92e-26	0.327647
Correlated	CNTN2	contactin 2 (axonal) [Source:HGNC Symbol;Acc:2172]	1	q32.1	1	205012325	205047627	ENSG00000184144	-	1036	9	994	7	26	96.37	0.87	16.65	4.05e-32	0.366515
Correlated	CNTN3	contactin 3 (plasmacytoma associated) [Source:HGNC Symbol;Acc:2173]	3	p12.3	-1	74311719	74570291	ENSG00000113805	-	1035	10	986	12	27	96.28	0.97	12.715	1.08e-26	0.332418
Correlated	CNTN4	contactin 4 [Source:HGNC Symbol;Acc:2174]	3	p26.3	1	2140497	3099645	ENSG00000144619	-	1030	11	979	14	26	95.81	1.07	12.249	4.23e-28	0.342463
Correlated	CNTN6	contactin 6 [Source:HGNC Symbol;Acc:2176]	3	p26.3	1	1134260	1445901	ENSG00000134115	-	933	3	904	0	26	86.79	0.32	32.172	3.46e-22	0.317106
Correlated	CNTNAP1	contactin associated protein 1 [Source:HGNC Symbol;Acc:8011]	17	q21.2	1	40834631	40851832	ENSG00000108797	-	964	8	930	3	23	89.67	0.83	22.616	1.86e-39	0.423313
Correlated	CNTNAP2	contactin associated protein-like 2 [Source:HGNC Symbol;Acc:13830]	7	q35	1	145813453	148118090	ENSG00000174469	-	948	12	906	10	20	88.19	1.27	16.159	3.23e-41	0.436723
Correlated	CNTRL	centriolin [Source:HGNC Symbol;Acc:1858]	9	q33.2	1	123837141	123939888	ENSG00000119397	+	1062	6	1021	4	31	98.79	0.56	17.222	1.21e-22	0.300487
Correlated	COCH	cochlin [Source:HGNC Symbol;Acc:2180]	14	q12	1	31343720	31364271	ENSG00000100473	-	970	12	933	8	17	90.23	1.24	20.069	0	0.485718
Correlated	COG2	component of oligomeric golgi complex 2 [Source:HGNC Symbol;Acc:6546]	1	q42.2	1	230778235	230829728	ENSG00000135775	+	1073	7	1031	4	31	99.81	0.65	17.969	2.24e-27	0.33091
Correlated	COL10A1	collagen, type X, alpha 1 [Source:HGNC Symbol;Acc:2185]	6	q22.1	-1	116440086	116479910	ENSG00000123500	-	950	5	921	0	24	88.37	0.53	32.759	1.36e-36	0.409921
Correlated	COL13A1	collagen, type XIII, alpha 1 [Source:HGNC Symbol;Acc:2190]	10	q22.1	1	71561644	71724031	ENSG00000197467	-	862	6	832	3	21	80.19	0.7	21.284	3.82e-28	0.374661
Correlated	COL1A2	collagen, type I, alpha 2 [Source:HGNC Symbol;Acc:2198]	LRG_2		1	5001	41672	LRG_2	+	1054	10	1002	16	26	98.05	0.95	11.261	2.23e-23	0.306862
Correlated	COL21A1	collagen, type XXI, alpha 1 [Source:HGNC Symbol;Acc:17025]	6	p12.1	-1	55921388	56258892	ENSG00000124749	-	919	6	885	5	23	85.49	0.65	17.285	1.03e-22	0.323558
Correlated	COL24A1	collagen, type XXIV, alpha 1 [Source:HGNC Symbol;Acc:20821]	1	p22.3	-1	86194916	86622626	ENSG00000171502	-	1002	10	966	1	25	93.21	1	26.026	0	0.501616
Correlated	COL26A1	collagen, type XXVI, alpha 1 [UniGene: NA]						unknown	-	998	7	960	4	27	92.84	0.7	18.679	1.7e-28	0.35051
Correlated	COL4A1	collagen, type IV, alpha 1 [Source:HGNC Symbol;Acc:2202]	13	q34	-1	110801318	110959496	ENSG00000187498	-	961	6	927	2	26	89.4	0.62	22.523	7.77e-30	0.365997
Correlated	COL4A3BP	collagen, type IV, alpha 3 (Goodpasture antigen) binding protein [Source:HGNC Symbol;Acc:2205]	5	q13.3	-1	74664311	74807963	ENSG00000113163	-	1065	7	1023	5	30	99.07	0.66	16.791	1.69e-25	0.319799
Correlated	COL6A1	collagen, type VI, alpha 1 [Source:HGNC Symbol;Acc:2211]	LRG_475		1	5001	28301	LRG_475	+	960	11	910	18	21	89.3	1.15	11.379	5.67e-26	0.340168
Correlated	COL6A1	collagen, type VI, alpha 1 [Source:HGNC Symbol;Acc:2211]	LRG_475		1	5001	28301	LRG_475	-	960	9	917	11	23	89.3	0.94	13.5	9.55e-26	0.338581
Correlated	COL6A2	collagen, type VI, alpha 2 [Source:HGNC Symbol;Acc:2212]	LRG_476		1	5001	39731	LRG_476	-	968	9	924	13	22	90.05	0.93	12.774	2.95e-24	0.326594
Correlated	COL6A6	collagen, type VI, alpha 6 [Source:HGNC Symbol;Acc:27023]	3	q22.1	1	130279178	130396999	ENSG00000206384	-	984	8	940	8	28	91.53	0.81	13.667	2.4e-23	0.317345
Correlated	COMMD3	COMM domain containing 3 [Source:HGNC Symbol;Acc:23332]	10	p12.2	1	22604903	22609235	ENSG00000148444	+	970	6	935	3	26	90.23	0.62	20.208	1.09e-26	0.343339
Correlated	COMMD5	COMM domain containing 5 [Source:HGNC Symbol;Acc:17902]	8	q24.3	-1	146066427	146079121	ENSG00000170619	+	1068	6	1028	4	30	99.35	0.56	17.8	2.08e-23	0.305055
Correlated	COMMD7	COMM domain containing 7 [Source:HGNC Symbol;Acc:16223]	20	q11.21	-1	31290493	31331814	ENSG00000149600	-	1052	7	1012	4	29	97.86	0.67	18.596	2.36e-28	0.340477
Correlated	COMP	cartilage oligomeric matrix protein [Source:HGNC Symbol;Acc:2227]	19	p13.11	-1	18893583	18902123	ENSG00000105664	+	943	9	903	9	22	87.72	0.95	15.21	3.16e-29	0.365454
Correlated	COPE	coatomer protein complex, subunit epsilon [Source:HGNC Symbol;Acc:2234]	19	p13.11	-1	19010323	19030206	ENSG00000105669	+	957	7	922	4	24	89.02	0.73	19.645	5.25e-30	0.367868
Correlated	COPG2IT1	COPG2 imprinted transcript 1 (non-protein coding) [Source:HGNC Symbol;Acc:2238]	HG1308_PATCH	q32.2	1	130207103	130210545	ENSG00000270561	-	850	7	821	2	20	79.07	0.82	24.486	1.12e-37	0.440055
Correlated	COPZ2	coatomer protein complex, subunit zeta 2 [Source:HGNC Symbol;Acc:19356]	17	q21.32	-1	46103533	46115392	ENSG00000005243	-	1051	8	1008	8	27	97.77	0.76	15.014	1.02e-25	0.323406
Correlated	COQ2	coenzyme Q2 4-hydroxybenzoate polyprenyltransferase [Source:HGNC Symbol;Acc:25223]	4	q21.23	-1	84182689	84206067	ENSG00000173085	+	1073	5	1034	2	32	99.81	0.47	20.714	4.63e-23	0.301906
Correlated	CORO1A	coronin, actin binding protein, 1A [Source:HGNC Symbol;Acc:2252]	LRG_195		1	5001	10472	LRG_195	-	944	10	901	12	21	87.81	1.06	13.842	2.89e-29	0.365521
Correlated	CORO2A	coronin, actin binding protein, 2A [Source:HGNC Symbol;Acc:2255]	9	q22.33	-1	100883257	100954922	ENSG00000106789	+	1067	8	1021	9	29	99.26	0.75	13.571	4.05e-23	0.303161
Correlated	CORO2B	coronin, actin binding protein, 2B [Source:HGNC Symbol;Acc:2256]	15	q23	1	68871308	69020145	ENSG00000103647	-	957	6	922	4	25	89.02	0.63	18.523	2.16e-24	0.329457
Correlated	COX6A1	cytochrome c oxidase subunit VIa polypeptide 1 [Source:HGNC Symbol;Acc:2277]	12	q24.31	1	120875893	120878545	ENSG00000111775	-	1046	6	1007	4	29	97.3	0.57	17.931	1.38e-23	0.309508
Correlated	COX7A1	cytochrome c oxidase subunit VIIa polypeptide 1 (muscle) [Source:HGNC Symbol;Acc:2287]	19	q13.12	-1	36641824	36643771	ENSG00000161281	-	930	12	896	5	17	86.51	1.29	22.637	0	0.529689
Correlated	COX7B	cytochrome c oxidase subunit VIIb [Source:HGNC Symbol;Acc:2291]	HG1426_PATCH	q21.1	1	77160392	77168327	ENSG00000269083	-	1045	9	1002	6	28	97.21	0.86	16.946	9.53e-33	0.368679
Correlated	CPA2	carboxypeptidase A2 (pancreatic) [Source:HGNC Symbol;Acc:2297]	7	q32.2	1	129906667	129929638	ENSG00000158516	+	949	6	917	1	25	88.28	0.63	26.24	7.35e-35	0.399821
Correlated	CPA3	carboxypeptidase A3 (mast cell) [Source:HGNC Symbol;Acc:2298]	3	q24	1	148583043	148614983	ENSG00000163751	-	914	8	882	3	21	85.02	0.88	22.922	5.08e-40	0.437978
Correlated	CPEB1	cytoplasmic polyadenylation element binding protein 1 [Source:HGNC Symbol;Acc:21744]	15	q25.2	-1	83211951	83317612	ENSG00000214575	-	1026	14	983	7	22	95.44	1.36	19	0	0.496173
Correlated	CPEB3	cytoplasmic polyadenylation element binding protein 3 [Source:HGNC Symbol;Acc:21746]	10	q23.32	-1	93806449	94050844	ENSG00000107864	-	1061	7	1020	4	30	98.7	0.66	18.248	8.21e-28	0.335579
Correlated	CPM	carboxypeptidase M [Source:HGNC Symbol;Acc:2311]	12	q15	-1	69235977	69365350	ENSG00000135678	-	1073	10	1020	15	28	99.81	0.93	11.295	1.87e-23	0.304668
Correlated	CPNE2	copine II [Source:HGNC Symbol;Acc:2315]	16	q13	1	57126449	57181878	ENSG00000140848	+	1025	5	988	2	30	95.35	0.49	20.918	2.71e-23	0.31056
Correlated	CPNE2	copine II [Source:HGNC Symbol;Acc:2315]	16	q13	1	57126449	57181878	ENSG00000140848	-	1025	8	985	5	27	95.35	0.78	18.022	3.51e-31	0.36275
Correlated	CPNE3	copine III [Source:HGNC Symbol;Acc:2316]	8	q21.3	1	87497059	87573726	ENSG00000085719	+	972	8	940	3	21	90.42	0.82	24.376	1.46e-42	0.438582
Correlated	CPNE4	copine IV [Source:HGNC Symbol;Acc:2317]	3	q22.1	-1	131252399	132004254	ENSG00000196353	-	1004	7	965	4	28	93.4	0.7	18.255	7.74e-28	0.345142
Correlated	CPNE6	copine VI (neuronal) [Source:HGNC Symbol;Acc:2319]	14	q11.2	1	24540046	24547309	ENSG00000100884	-	943	5	911	1	26	87.72	0.53	25.349	2.69e-28	0.359235
Correlated	CPNE7	copine VII [Source:HGNC Symbol;Acc:2320]	16	q24.3	1	89642176	89663654	ENSG00000178773	-	937	4	908	1	24	87.16	0.43	26.771	3.63e-24	0.331293
Correlated	CPNE9	copine family member IX [Source:HGNC Symbol;Acc:24336]	3	p25.3	1	9745491	9771592	ENSG00000144550	-	1019	10	978	6	25	94.79	0.98	18.196	4.52e-39	0.409623
Correlated	CPOX	coproporphyrinogen oxidase [Source:HGNC Symbol;Acc:2321]	3	q12.1	-1	98239976	98312567	ENSG00000080819	+	913	6	881	3	23	84.93	0.66	20.989	9.77e-28	0.361235
Correlated	CPS1	carbamoyl-phosphate synthase 1, mitochondrial [Source:HGNC Symbol;Acc:2323]	LRG_336		1	83915	206423	LRG_336	+	954	9	919	5	21	88.74	0.94	20.443	8.14e-40	0.427548
Correlated	CPSF3L	cleavage and polyadenylation specific factor 3-like [Source:HGNC Symbol;Acc:26052]	1	p36.33	-1	1246965	1260071	ENSG00000127054	+	1031	5	995	1	30	95.91	0.48	24.548	2.13e-27	0.337726
Correlated	CPSF7	cleavage and polyadenylation specific factor 7, 59kDa [Source:HGNC Symbol;Acc:30098]	11	q12.2	-1	61170121	61197503	ENSG00000149532	+	1047	7	1005	5	30	97.4	0.67	16.507	4.61e-25	0.319581
Correlated	CPT2	carnitine palmitoyltransferase 2 [Source:HGNC Symbol;Acc:2330]	1	p32.3	1	53662101	53679869	ENSG00000157184	+	976	6	941	3	26	90.79	0.61	20.333	7.5e-27	0.343403
Correlated	CPXM1	carboxypeptidase X (M14 family), member 1 [Source:HGNC Symbol;Acc:15771]	20	p13	-1	2774715	2781283	ENSG00000088882	+	1036	7	994	7	28	96.37	0.68	14.8	2.45e-22	0.302019
Correlated	CR1	complement component (3b/4b) receptor 1 (Knops blood group) [Source:HGNC Symbol;Acc:2334]	1	q32.2	1	207669492	207813992	ENSG00000203710	-	1031	6	991	3	31	95.91	0.58	18.577	1.65e-24	0.318228
Correlated	CR1L	complement component (3b/4b) receptor 1-like [Source:HGNC Symbol;Acc:2335]	1	q32.2	1	207818458	207911761	ENSG00000197721	-	925	3	893	0	29	86.05	0.32	28.906	4.97e-20	0.301332
Correlated	CRABP1	cellular retinoic acid binding protein 1 [Source:HGNC Symbol;Acc:2338]	15	q25.1	1	78632666	78640572	ENSG00000166426	-	925	10	887	7	21	86.05	1.08	17.552	1.16e-37	0.421744
Correlated	CRABP2	cellular retinoic acid binding protein 2 [Source:HGNC Symbol;Acc:2339]	1	q23.1	-1	156669398	156675608	ENSG00000143320	+	939	9	900	10	20	87.35	0.96	15.338	1.82e-29	0.367821
Correlated	CRB2	crumbs homolog 2 (Drosophila) [Source:HGNC Symbol;Acc:18688]	9	q33.3	1	126118449	126142603	ENSG00000148204	+	907	4	878	0	25	84.37	0.44	31.276	2.77e-28	0.366214
Correlated	CREG2	cellular repressor of E1A-stimulated genes 2 [Source:HGNC Symbol;Acc:14272]	2	q11.2	-1	101965209	102004057	ENSG00000175874	-	922	5	888	3	26	85.77	0.54	18.589	1.16e-20	0.306936
Correlated	CRELD2	cysteine-rich with EGF-like domains 2 [Source:HGNC Symbol;Acc:28150]	22	q13.33	1	50311815	50321188	ENSG00000184164	-	928	6	897	2	23	86.33	0.65	24	8.46e-32	0.38521
Correlated	CRH	corticotropin releasing hormone [Source:HGNC Symbol;Acc:2355]	8	q13.1	-1	67088620	67090960	ENSG00000147571	+	923	4	894	1	24	85.86	0.43	26.371	8.15e-24	0.331189
Correlated	CRH	corticotropin releasing hormone [Source:HGNC Symbol;Acc:2355]	8	q13.1	-1	67088620	67090960	ENSG00000147571	-	923	7	889	6	21	85.86	0.76	17.75	5.43e-27	0.354106
Correlated	CRHBP	corticotropin releasing hormone binding protein [Source:HGNC Symbol;Acc:2356]	5	q13.3	1	76248538	76276983	ENSG00000145708	-	920	10	889	1	20	85.58	1.09	27.879	0	0.542862
Correlated	CRHR1	corticotropin releasing hormone receptor 1 [Source:HGNC Symbol;Acc:2357]	17	q21.31	1	43699267	43913194	ENSG00000120088	-	949	7	915	3	24	88.28	0.74	21.429	7.81e-33	0.387413
Correlated	CRIPT	cysteine-rich PDZ-binding protein [Source:HGNC Symbol;Acc:14312]	2	p21	1	46843555	46852881	ENSG00000119878	+	1039	8	1000	4	27	96.65	0.77	19.79	2.31e-34	0.379237
Correlated	CRISPLD2	cysteine-rich secretory protein LCCL domain containing 2 [Source:HGNC Symbol;Acc:25248]	16	q24.1	1	84853590	84954374	ENSG00000103196	-	924	10	884	10	20	85.95	1.08	15.4	8.59e-33	0.39236
Correlated	CRLS1	cardiolipin synthase 1 [Source:HGNC Symbol;Acc:16148]	20	p12.3	1	5986736	6020699	ENSG00000088766	+	1074	8	1030	6	30	99.91	0.74	16.15	8.45e-28	0.333462
Correlated	CRMP1	collapsin response mediator protein 1 [Source:HGNC Symbol;Acc:2365]	4	p16.2	-1	5749811	5894785	ENSG00000072832	-	954	5	923	2	24	88.74	0.52	23.498	3.76e-26	0.342482
Target	CRNDE	colorectal neoplasia differentially expressed (non-protein coding) [Source:HGNC Symbol;Acc:37078]	16	q12.2	-1	54952775	54963101	ENSG00000245694	+	1075	38	1037	0	0	100	3.53	28.289	0	1
Correlated	CRTAC1	cartilage acidic protein 1 [Source:HGNC Symbol;Acc:14882]	10	q24.2	-1	99624757	99790585	ENSG00000095713	-	945	5	913	2	25	87.91	0.53	22.5	4.73e-25	0.336307
Correlated	CRTC1	CREB regulated transcription coactivator 1 [Source:HGNC Symbol;Acc:16062]	19	p13.11	1	18794487	18893004	ENSG00000105662	-	933	4	901	1	27	86.79	0.43	24.077	8.63e-22	0.314033
Correlated	CRYAA	crystallin, alpha A [Source:HGNC Symbol;Acc:2388]	21	q22.3	1	44589118	44592915	ENSG00000160202	-	930	5	899	3	23	86.51	0.54	20.759	4.64e-23	0.324279
Correlated	CRYAB	crystallin, alpha B [Source:HGNC Symbol;Acc:2389]	HG388_HG400_PATCH	q23.1	-1	111779288	111794445	ENSG00000263007	-	923	8	881	11	23	85.86	0.87	12.537	2.73e-21	0.311792
Correlated	CSF1	colony stimulating factor 1 (macrophage) [Source:HGNC Symbol;Acc:2432]	1	p13.3	1	110452864	110473614	ENSG00000184371	-	944	8	906	9	21	87.81	0.85	15.318	2.79e-26	0.345199
Correlated	CSF2RA	colony stimulating factor 2 receptor, alpha, low-affinity (granulocyte-macrophage) [Source:HGNC Symbol;Acc:2435]	X	p22.33	1	1387693	1429274	ENSG00000198223	-	940	6	907	4	23	87.44	0.64	19.448	1.26e-25	0.341314
Correlated	CSF2RB	colony stimulating factor 2 receptor, beta, low-affinity (granulocyte-macrophage) [Source:HGNC Symbol;Acc:2436]	22	q12.3	1	37309670	37336491	ENSG00000100368	-	953	5	923	1	24	88.65	0.52	27.385	1.55e-30	0.372067
Correlated	CSF3R	colony stimulating factor 3 receptor (granulocyte) [Source:HGNC Symbol;Acc:2439]	LRG_144		1	4595	21866	LRG_144	-	948	7	915	4	22	88.19	0.74	20.803	8.41e-32	0.381143
Correlated	CSH1	chorionic somatomammotropin hormone 1 (placental lactogen) [Source:HGNC Symbol;Acc:2440]	17	q23.3	-1	61972275	61974021	ENSG00000136488	-	880	6	845	6	23	81.86	0.68	15.172	7.15e-20	0.307616
Correlated	CSH2	chorionic somatomammotropin hormone 2 [Source:HGNC Symbol;Acc:2441]	17	q23.3	-1	61949372	61951126	ENSG00000213218	+	893	5	863	1	24	83.07	0.56	25.661	1.2e-28	0.371591
Correlated	CSK	c-src tyrosine kinase [Source:HGNC Symbol;Acc:2444]	15	q24.1	1	75074398	75095539	ENSG00000103653	-	950	5	918	3	24	88.37	0.53	20.474	9.66e-23	0.318454
Correlated	CSN1S1	casein alpha s1 [Source:HGNC Symbol;Acc:2445]	4	q13.3	1	70796799	70812289	ENSG00000126545	-	920	4	892	0	24	85.58	0.43	32.857	1.13e-29	0.37298
Correlated	CSNK2A1	casein kinase 2, alpha 1 polypeptide [Source:HGNC Symbol;Acc:2457]	20	p13	-1	459116	524482	ENSG00000101266	+	1044	6	1009	0	29	97.12	0.57	29.829	1e-39	0.408215
Correlated	CSRNP3	cysteine-serine-rich nuclear protein 3 [Source:HGNC Symbol;Acc:30729]	2	q24.3	1	166326157	166545917	ENSG00000178662	-	1058	11	1001	19	27	98.42	1.04	10.209	5.27e-23	0.303639
Correlated	CSRP1	cysteine and glycine-rich protein 1 [Source:HGNC Symbol;Acc:2469]	1	q32.1	-1	201452658	201478584	ENSG00000159176	-	933	7	897	5	24	86.79	0.75	17.556	1e-26	0.350353
Correlated	CSRP2BP	CSRP2 binding protein [Source:HGNC Symbol;Acc:15904]	20	p11.23	1	18118499	18169031	ENSG00000149474	+	1065	6	1026	3	30	99.07	0.56	19.722	5.06e-26	0.323288
Correlated	CST1	cystatin SN [Source:HGNC Symbol;Acc:2473]	20	p11.21	-1	23728190	23731905	ENSG00000170373	+	911	5	882	1	23	84.74	0.55	27.113	3.03e-30	0.378624
Correlated	CSTA	cystatin A (stefin A) [Source:HGNC Symbol;Acc:2481]	3	q21.1	1	122044091	122060819	ENSG00000121552	+	938	11	896	13	18	87.26	1.17	14.825	1.58e-34	0.400134
Correlated	CTCF	CCCTC-binding factor (zinc finger protein) [Source:HGNC Symbol;Acc:13723]	16	q22.1	1	67596310	67673086	ENSG00000102974	+	962	4	932	1	25	89.49	0.42	26.538	5.88e-24	0.325441
Correlated	CTDSP1	CTD (carboxy-terminal domain, RNA polymerase II, polypeptide A) small phosphatase 1 [Source:HGNC Symbol;Acc:21614]	2	q35	1	219262979	219270664	ENSG00000144579	+	962	5	929	3	25	89.49	0.52	20.042	2.92e-22	0.312844
Correlated	CTNNA1	catenin (cadherin-associated protein), alpha 1, 102kDa [Source:HGNC Symbol;Acc:2509]	5	q31.2	1	137946656	138270723	ENSG00000044115	+	971	9	936	3	23	90.33	0.93	22.758	1.54e-44	0.449302
Correlated	CTNNA2	catenin (cadherin-associated protein), alpha 2 [Source:HGNC Symbol;Acc:2510]	2	p12	1	79412357	80875905	ENSG00000066032	-	946	8	909	6	23	88	0.85	17.438	3.92e-30	0.370826
Correlated	CTPS2	CTP synthase 2 [Source:HGNC Symbol;Acc:2520]	X	p22.2	-1	16606126	16731059	ENSG00000047230	+	1030	7	992	3	28	95.81	0.68	20.6	1.59e-31	0.363981
Correlated	CTRL	chymotrypsin-like [Source:HGNC Symbol;Acc:2524]	16	q22.1	-1	67961543	67966317	ENSG00000141086	-	937	4	907	1	25	87.16	0.43	25.848	2.37e-23	0.325259
Correlated	CTSC	cathepsin C [Source:HGNC Symbol;Acc:2528]	LRG_50		1	5001	49182	LRG_50	-	1051	12	994	21	24	97.77	1.14	10.616	4.07e-26	0.326064
Correlated	CTSD	cathepsin D [Source:HGNC Symbol;Acc:2529]	11	p15.5	-1	1773982	1785222	ENSG00000117984	-	954	5	920	2	27	88.74	0.52	21.295	1.02e-23	0.325061
Correlated	CTSE	cathepsin E [Source:HGNC Symbol;Acc:2530]	HG1293_PATCH	q32.1	-1	206072825	206087470	ENSG00000264606	+	939	8	905	3	23	87.35	0.85	22.029	1.97e-38	0.423044
Correlated	CTSF	cathepsin F [Source:HGNC Symbol;Acc:2531]	11	q13.2	-1	66330934	66336312	ENSG00000174080	-	962	6	928	5	23	89.49	0.62	18.094	8.91e-24	0.324122
Correlated	CTSG	cathepsin G [Source:HGNC Symbol;Acc:2532]	14	q12	-1	25042728	25045466	ENSG00000100448	-	922	5	891	1	25	85.77	0.54	25.611	1.37e-28	0.36529
Correlated	CTSL2	cathepsin L2 [UniGene: NA]						unknown	+	956	10	916	9	21	88.93	1.05	16.231	1.21e-34	0.397048
Correlated	CTSW	cathepsin W [Source:HGNC Symbol;Acc:2546]	11	q13.1	1	65647280	65651212	ENSG00000172543	-	934	6	902	2	24	86.88	0.64	23.35	6.16e-31	0.378437
Correlated	CTTN	cortactin [Source:HGNC Symbol;Acc:3338]	11	q13.3	1	70244510	70282690	ENSG00000085733	+	1055	11	1003	15	26	98.14	1.04	12.063	1.29e-27	0.33527
Correlated	CUL2	cullin 2 [Source:HGNC Symbol;Acc:2552]	10	p11.21	-1	35297479	35379570	ENSG00000108094	+	972	7	935	6	24	90.42	0.72	16.883	1.26e-25	0.335654
Correlated	CXADR	coxsackie virus and adenovirus receptor [Source:HGNC Symbol;Acc:2559]	21	q21.1	1	18884700	18965897	ENSG00000154639	+	1073	12	1023	13	25	99.81	1.12	13.92	4.69e-35	0.377114
Correlated	CXCL16	chemokine (C-X-C motif) ligand 16 [Source:HGNC Symbol;Acc:16642]	17	p13.2	-1	4636821	4643217	ENSG00000161921	-	1052	8	1012	5	27	97.86	0.76	18.497	5.18e-32	0.363073
Correlated	CXCL16	chemokine (C-X-C motif) ligand 16 [Source:HGNC Symbol;Acc:16642]	17	p13.2	-1	4636821	4643217	ENSG00000161921	+	1052	11	1005	12	24	97.86	1.05	14.375	2.41e-33	0.370961
Correlated	CXCL3	chemokine (C-X-C motif) ligand 3 [Source:HGNC Symbol;Acc:4604]	4	q13.3	-1	74902306	74904524	ENSG00000163734	-	923	5	894	1	23	85.86	0.54	27.47	1.23e-30	0.378718
Correlated	CXCL5	chemokine (C-X-C motif) ligand 5 [Source:HGNC Symbol;Acc:10642]	4	q13.3	-1	74861359	74864496	ENSG00000163735	-	927	6	895	3	23	86.23	0.65	21.31	3.69e-28	0.361392
Correlated	CXCR4	chemokine (C-X-C motif) receptor 4 [Source:HGNC Symbol;Acc:2561]	LRG_51		1	5001	8807	LRG_51	+	946	13	884	31	18	88	1.37	9.0161	1.21e-23	0.32588
Correlated	CXCR7	chemokine (C-X-C motif) receptor 7 [UniGene: NA]						unknown	+	1039	13	974	29	23	96.65	1.25	8.9332	2.7e-23	0.30848
Correlated	CXORF21	NA	NA	NA	NA	NA	NA	NA	-	931	6	900	2	23	86.6	0.64	24.078	6.69e-32	0.385239
Correlated	CXORF36	NA	NA	NA	NA	NA	NA	NA	-	1032	8	993	3	28	96	0.78	20.848	2.63e-36	0.391681
Correlated	CXORF57	NA	NA	NA	NA	NA	NA	NA	+	932	5	900	3	24	86.7	0.54	20.086	2.57e-22	0.318261
Correlated	CYB561	cytochrome b561 [Source:HGNC Symbol;Acc:2571]	17	q23.3	-1	61509665	61523739	ENSG00000008283	-	975	10	937	7	21	90.7	1.03	18.501	9.8e-40	0.422472
Correlated	CYB5B	cytochrome b5 type B (outer mitochondrial membrane) [Source:HGNC Symbol;Acc:24374]	16	q22.1	1	69458428	69500169	ENSG00000103018	-	1069	10	1017	15	27	99.44	0.94	11.557	4.81e-24	0.309322
Correlated	CYBRD1	cytochrome b reductase 1 [Source:HGNC Symbol;Acc:20797]	2	q31.1	1	172378757	172414643	ENSG00000071967	+	1045	12	992	16	25	97.21	1.15	12.104	3.67e-30	0.353003
Correlated	CYFIP1	cytoplasmic FMR1 interacting protein 1 [Source:HGNC Symbol;Acc:13759]	15	q11.2	1	22892005	23006016	ENSG00000068793	-	970	5	938	3	24	90.23	0.52	20.905	3.25e-23	0.31866
Correlated	CYFIP2	cytoplasmic FMR1 interacting protein 2 [Source:HGNC Symbol;Acc:13760]	5	q33.3	1	156693089	156822606	ENSG00000055163	-	967	12	925	11	19	89.95	1.24	16.275	1.72e-41	0.433909
Correlated	CYGB	cytoglobin [Source:HGNC Symbol;Acc:16505]	17	q25.1	-1	74523438	74547257	ENSG00000161544	-	1032	12	989	8	23	96	1.16	17.691	2.8e-45	0.439648
Correlated	CYLD	cylindromatosis (turban tumor syndrome) [Source:HGNC Symbol;Acc:2584]	LRG_491		1	5001	64886	LRG_491	-	971	13	933	9	16	90.33	1.34	19.785	0	0.501844
Correlated	CYP1A2	cytochrome P450, family 1, subfamily A, polypeptide 2 [Source:HGNC Symbol;Acc:2596]	15	q24.1	1	75041185	75048543	ENSG00000140505	-	950	7	918	3	22	88.37	0.74	22.931	3.72e-35	0.401388
Correlated	CYP20A1	cytochrome P450, family 20, subfamily A, polypeptide 1 [Source:HGNC Symbol;Acc:20576]	2	q33.2	1	204103663	204163009	ENSG00000119004	+	952	5	919	2	26	88.56	0.53	21.935	1.99e-24	0.330573
Correlated	CYP26A1	cytochrome P450, family 26, subfamily A, polypeptide 1 [Source:HGNC Symbol;Acc:2603]	10	q23.33	1	94833232	94837647	ENSG00000095596	-	952	8	915	9	20	88.56	0.84	16	1.72e-27	0.352089
Correlated	CYP2C8	cytochrome P450, family 2, subfamily C, polypeptide 8 [Source:HGNC Symbol;Acc:2622]	10	q23.33	-1	96796530	96829254	ENSG00000138115	-	924	8	891	4	21	85.95	0.87	21.241	5.58e-37	0.417947
Correlated	CYP2J2	cytochrome P450, family 2, subfamily J, polypeptide 2 [Source:HGNC Symbol;Acc:2634]	1	p32.1	-1	60358980	60392462	ENSG00000134716	+	947	6	914	4	23	88.09	0.63	19.593	8.11e-26	0.341397
Correlated	CYP46A1	cytochrome P450, family 46, subfamily A, polypeptide 1 [Source:HGNC Symbol;Acc:2641]	14	q32.2	1	100150641	100193638	ENSG00000036530	-	929	8	899	1	21	86.42	0.86	28.475	0	0.487803
Correlated	CYP4X1	cytochrome P450, family 4, subfamily X, polypeptide 1 [Source:HGNC Symbol;Acc:20244]	1	p33	1	47427036	47516423	ENSG00000186377	-	1030	9	986	9	26	95.81	0.87	14.714	3.45e-28	0.343038
Correlated	CYP4Z1	cytochrome P450, family 4, subfamily Z, polypeptide 1 [Source:HGNC Symbol;Acc:20583]	1	p33	1	47533160	47583991	ENSG00000186160	-	1026	5	991	0	30	95.44	0.49	29.314	8.51e-33	0.37237
Correlated	CYS1	cystin 1 [Source:HGNC Symbol;Acc:18525]	2	p25.1	-1	10196907	10221071	ENSG00000205795	-	942	11	902	7	22	87.63	1.17	17.444	4.49e-41	0.437315
Correlated	CYTH2	cytohesin 2 [Source:HGNC Symbol;Acc:9502]	19	q13.33	1	48972289	48985571	ENSG00000105443	+	1048	11	1003	10	24	97.49	1.05	15.684	1.35e-36	0.390309
Correlated	CYTH4	cytohesin 4 [Source:HGNC Symbol;Acc:9505]	22	q13.1	1	37678068	37711382	ENSG00000100055	-	960	7	924	7	22	89.3	0.73	16.552	4.38e-25	0.333904
Correlated	DAAM1	dishevelled associated activator of morphogenesis 1 [Source:HGNC Symbol;Acc:18142]	14	q23.1	1	59655364	59838123	ENSG00000100592	+	1072	11	1025	9	27	99.72	1.03	15.516	3.39e-36	0.383689
Correlated	DAAM2	dishevelled associated activator of morphogenesis 2 [Source:HGNC Symbol;Acc:18143]	6	p21.2	1	39760142	39872648	ENSG00000146122	-	955	8	917	7	23	88.84	0.84	16.43	2.65e-28	0.357022
Correlated	DAB2	Dab, mitogen-responsive phosphoprotein, homolog 2 (Drosophila) [Source:HGNC Symbol;Acc:2662]	5	p13.1	-1	39371780	39462402	ENSG00000153071	-	1070	15	1004	29	22	99.53	1.4	9.8587	6.84e-30	0.347196
Correlated	DACH2	dachshund homolog 2 (Drosophila) [Source:HGNC Symbol;Acc:16814]	X	q21.2	1	85403462	86087607	ENSG00000126733	-	999	6	962	2	29	92.93	0.6	21.407	2.38e-28	0.34937
Correlated	DACT3-AS1	DACT3 antisense RNA 1 [UniGene: Uncharacterized LOC100506068]						unknown	-	813	3	787	0	23	75.63	0.37	31.269	1.34e-21	0.334826
Correlated	DAP	death-associated protein [Source:HGNC Symbol;Acc:2672]	5	p15.2	-1	10679342	10761384	ENSG00000112977	+	971	5	938	2	26	90.33	0.51	22.373	6.59e-25	0.330749
Correlated	DARC	Duffy blood group, atypical chemokine receptor [Source:HGNC Symbol;Acc:4035]	1	q23.2	1	159173097	159176290	ENSG00000213088	-	932	10	896	7	19	86.7	1.07	18.905	1.15e-40	0.437356
Correlated	DAZAP2	DAZ associated protein 2 [Source:HGNC Symbol;Acc:2684]	12	q13.13	1	51632076	51665146	ENSG00000183283	+	1073	7	1032	3	31	99.81	0.65	19.766	3.17e-30	0.348756
Correlated	DBC1	deleted in bladder cancer 1 [Source:HGNC Symbol;Acc:2687]	9	q33.1	-1	121915736	122131745	ENSG00000078725	-	967	7	934	2	24	89.95	0.72	24.262	2.76e-37	0.410319
Correlated	DBF4	DBF4 homolog (S. cerevisiae) [Source:HGNC Symbol;Acc:17364]	7	q21.12	1	87505531	87538856	ENSG00000006634	+	955	11	916	8	20	88.84	1.15	17.835	5.48e-42	0.439344
Correlated	DBN1	drebrin 1 [Source:HGNC Symbol;Acc:2695]	5	q35.3	-1	176883609	176901402	ENSG00000113758	-	950	6	917	4	23	88.37	0.63	19.655	6.72e-26	0.341432
Correlated	DBNDD1	dysbindin (dystrobrevin binding protein 1) domain containing 1 [Source:HGNC Symbol;Acc:28455]	16	q24.3	-1	90071273	90086536	ENSG00000003249	+	948	4	916	1	27	88.19	0.42	24.465	3.94e-22	0.31415
Correlated	DBNDD2	dysbindin (dystrobrevin binding protein 1) domain containing 2 [Source:HGNC Symbol;Acc:15881]	20	q13.12	1	44034697	44039250	ENSG00000244274	-	905	9	859	16	21	84.19	0.99	10.86	2.1e-20	0.307725
Correlated	DCAF13	DDB1 and CUL4 associated factor 13 [Source:HGNC Symbol;Acc:24535]	8	q22.3	1	104426942	104455681	ENSG00000164934	+	1068	9	1026	6	27	99.35	0.84	17.8	1.93e-34	0.3745
Correlated	DCAF15	DDB1 and CUL4 associated factor 15 [Source:HGNC Symbol;Acc:25095]	19	p13.12	1	14063304	14072254	ENSG00000132017	-	951	5	917	2	27	88.47	0.53	21.228	1.2e-23	0.325032
Correlated	DCAF6	DDB1 and CUL4 associated factor 6 [Source:HGNC Symbol;Acc:30002]	1	q24.2	1	167905021	168045081	ENSG00000143164	+	1072	7	1032	3	30	99.72	0.65	20.281	5.06e-31	0.353753
Correlated	DCAF7	DDB1 and CUL4 associated factor 7 [Source:HGNC Symbol;Acc:30915]	17	q23.3	1	61627822	61671639	ENSG00000136485	+	1075	7	1031	6	31	100	0.65	15.233	4.91e-23	0.301441
Correlated	DCAF8	DDB1 and CUL4 associated factor 8 [Source:HGNC Symbol;Acc:24891]	1	q23.2	-1	160185505	160232321	ENSG00000132716	+	1067	8	1022	9	28	99.26	0.75	13.948	8.64e-24	0.307854
Correlated	DCLK1	doublecortin-like kinase 1 [Source:HGNC Symbol;Acc:2700]	13	q13.3	-1	36345478	36705443	ENSG00000133083	-	1063	15	1013	14	21	98.88	1.41	15.273	0	0.447527
Correlated	DCLK2	doublecortin-like kinase 2 [Source:HGNC Symbol;Acc:19002]	4	q31.23	1	150999426	151178609	ENSG00000170390	-	995	9	958	2	26	92.56	0.9	23.26	1.4e-45	0.449384
Correlated	DCP2	decapping mRNA 2 [Source:HGNC Symbol;Acc:24452]	5	q22.2	1	112312399	112356667	ENSG00000172795	+	1033	10	988	7	28	96.09	0.97	15.991	4e-34	0.378948
Correlated	DCPS	decapping enzyme, scavenger [Source:HGNC Symbol;Acc:29812]	11	q24.2	1	126173647	126215644	ENSG00000110063	-	967	5	933	3	26	89.95	0.52	19.496	1.17e-21	0.307437
Correlated	DCTN1	dynactin 1 [Source:HGNC Symbol;Acc:2711]	2	p13.1	-1	74588281	74619214	ENSG00000204843	-	933	7	899	5	22	86.79	0.75	18.767	1.32e-28	0.363242
Correlated	DCTN1-AS1	DCTN1 antisense RNA 1						unknown	-	854	5	825	0	24	79.44	0.59	29.448	5.65e-33	0.409316
Correlated	DCTN3	dynactin 3 (p22) [Source:HGNC Symbol;Acc:2713]	9	p13.3	-1	34613548	34620515	ENSG00000137100	+	960	6	929	2	23	89.3	0.63	24.828	6.94e-33	0.385506
Correlated	DCTN3	dynactin 3 (p22) [Source:HGNC Symbol;Acc:2713]	9	p13.3	-1	34613548	34620515	ENSG00000137100	-	960	4	931	0	25	89.3	0.42	33.103	6.95e-30	0.366502
Correlated	DDAH2	dimethylarginine dimethylaminohydrolase 2 [Source:HGNC Symbol;Acc:2716]	HSCHR6_MHC_MANN	p22.1	-1	31734308	31737887	ENSG00000233076	+	959	8	921	9	21	89.21	0.83	15.562	1.05e-26	0.345441
Correlated	DDAH2	dimethylarginine dimethylaminohydrolase 2 [Source:HGNC Symbol;Acc:2716]	HSCHR6_MHC_MANN	p22.1	-1	31734308	31737887	ENSG00000233076	-	959	8	922	8	21	89.21	0.83	16.534	1.85e-28	0.357321
Correlated	DDN	dendrin [Source:HGNC Symbol;Acc:24458]	12	q13.12	-1	49388932	49393092	ENSG00000181418	-	924	5	894	2	23	85.95	0.54	23.571	3.08e-26	0.348617
Correlated	DDN	dendrin [Source:HGNC Symbol;Acc:24458]	12	q13.12	-1	49388932	49393092	ENSG00000181418	+	924	6	892	4	22	85.95	0.65	19.8	4.24e-26	0.347624
Correlated	DDR1	discoidin domain receptor tyrosine kinase 1 [Source:HGNC Symbol;Acc:2730]	HSCHR6_MHC_MANN	p22.1	1	30893440	30912617	ENSG00000234078	+	959	8	921	7	23	89.21	0.83	16.499	2e-28	0.357082
Correlated	DDX11	DEAD/H (Asp-Glu-Ala-Asp/His) box helicase 11 [Source:HGNC Symbol;Acc:2736]	12	p11.21	1	31226779	31257725	ENSG00000013573	+	1065	9	1026	4	26	99.07	0.85	21.066	4.69e-41	0.411186
Correlated	DDX23	DEAD (Asp-Glu-Ala-Asp) box polypeptide 23 [Source:HGNC Symbol;Acc:17347]	12	q13.12	-1	49223547	49246625	ENSG00000174243	+	976	5	943	2	26	90.79	0.51	22.488	4.93e-25	0.330794
Correlated	DDX26B	DEAD/H (Asp-Glu-Ala-Asp/His) box polypeptide 26B [Source:HGNC Symbol;Acc:27334]	HG1443_HG1444_PATCH	q26.3	1	134654688	134716539	ENSG00000268630	+	1022	6	982	3	31	95.07	0.59	18.414	2.69e-24	0.318133
Correlated	DDX27	DEAD (Asp-Glu-Ala-Asp) box polypeptide 27 [Source:HGNC Symbol;Acc:15837]	20	q13.13	1	47835884	47860614	ENSG00000124228	+	940	6	908	1	25	87.44	0.64	25.991	1.56e-34	0.399749
Correlated	DDX31	DEAD (Asp-Glu-Ala-Asp) box polypeptide 31 [Source:HGNC Symbol;Acc:16715]	9	q34.13	-1	135468384	135545788	ENSG00000125485	+	1067	11	1027	4	25	99.26	1.03	21.735	0	0.462666
Correlated	DDX39A	DEAD (Asp-Glu-Ala-Asp) box polypeptide 39A [Source:HGNC Symbol;Acc:17821]	19	p13.12	-1	14519631	14530192	ENSG00000123136	+	950	7	915	6	22	88.37	0.74	17.639	8.26e-27	0.34778
Correlated	DDX3Y	DEAD (Asp-Glu-Ala-Asp) box helicase 3, Y-linked [Source:HGNC Symbol;Acc:2699]	Y	q11.21	1	15016019	15032390	ENSG00000067048	-	953	6	916	5	26	88.65	0.63	16.244	2.56e-21	0.307061
Correlated	DDX42	DEAD (Asp-Glu-Ala-Asp) box helicase 42 [Source:HGNC Symbol;Acc:18676]	17	q23.3	1	61850963	61896677	ENSG00000198231	+	964	5	931	1	27	89.67	0.52	25.104	5.06e-28	0.35347
Correlated	DDX52	DEAD (Asp-Glu-Ala-Asp) box polypeptide 52 [Source:HGNC Symbol;Acc:20038]	17	q12	-1	35969787	36003493	ENSG00000141141	+	921	6	889	5	21	85.67	0.65	18.606	1.81e-24	0.336396
Correlated	DDX58	DEAD (Asp-Glu-Ala-Asp) box polypeptide 58 [Source:HGNC Symbol;Acc:19102]	9	p21.1	-1	32455300	32526322	ENSG00000107201	-	1059	7	1018	5	29	98.51	0.66	17.16	4.51e-26	0.324537
Correlated	DEF6	differentially expressed in FDCP 6 homolog (mouse) [Source:HGNC Symbol;Acc:2760]	6	p21.31	1	35265595	35289548	ENSG00000023892	+	1062	9	1026	1	26	98.79	0.85	27.309	0	0.47352
Correlated	DENND1B	DENN/MADD domain containing 1B [Source:HGNC Symbol;Acc:28404]	1	q31.3	-1	197473878	197744826	ENSG00000213047	+	1031	11	977	16	27	95.91	1.07	11.054	3.94e-25	0.322518
Correlated	DENND1B	DENN/MADD domain containing 1B [Source:HGNC Symbol;Acc:28404]	1	q31.3	-1	197473878	197744826	ENSG00000213047	-	1031	9	982	11	29	95.91	0.87	12.209	4.05e-23	0.308412
Correlated	DENND1C	DENN/MADD domain containing 1C [Source:HGNC Symbol;Acc:26225]	19	p13.3	-1	6467218	6482568	ENSG00000205744	-	963	9	929	5	20	89.58	0.93	21.347	1.3e-41	0.435475
Correlated	DENND2A	DENN/MADD domain containing 2A [Source:HGNC Symbol;Acc:22212]	7	q34	-1	140218220	140373793	ENSG00000146966	-	956	6	920	4	26	88.93	0.63	17.925	1.34e-23	0.323834
Correlated	DENND2A	DENN/MADD domain containing 2A [Source:HGNC Symbol;Acc:22212]	7	q34	-1	140218220	140373793	ENSG00000146966	+	956	7	918	6	25	88.93	0.73	16.087	2.15e-24	0.329643
Correlated	DENND5A	DENN/MADD domain containing 5A [Source:HGNC Symbol;Acc:19344]	11	p15.4	-1	9160372	9286937	ENSG00000184014	-	964	8	933	2	21	89.67	0.83	26.593	0	0.461468
Correlated	DENND6A	DENN/MADD domain containing 6A [UniGene: NA]						unknown	+	116	1	112	0	3	10.79	0.86	29	1.07e-07	0.493435
Correlated	DENR	density-regulated protein [Source:HGNC Symbol;Acc:2769]	12	q24.31	1	123237321	123255611	ENSG00000139726	+	1050	11	1010	4	25	97.67	1.05	21.389	0	0.462489
Correlated	DEPDC1	DEP domain containing 1 [Source:HGNC Symbol;Acc:22949]	1	p31.2	-1	68939835	68962904	ENSG00000024526	+	1062	17	1003	23	19	98.79	1.6	12.538	3.92e-44	0.427557
Correlated	DEPDC1B	DEP domain containing 1B [Source:HGNC Symbol;Acc:24902]	5	q12.1	-1	59892739	59996017	ENSG00000035499	+	1052	14	1006	11	21	97.86	1.33	16.832	0	0.458241
Correlated	DERL3	derlin 3 [Source:HGNC Symbol;Acc:14236]	22	q11.23	-1	24176690	24181315	ENSG00000099958	-	1046	8	1006	4	28	97.3	0.76	19.37	1.29e-33	0.373627
Correlated	DESI2	desumoylating isopeptidase 2 [UniGene: PPPDE peptidase domain containing 1]						unknown	+	1037	7	998	4	28	96.47	0.68	18.855	9.32e-29	0.345519
Correlated	DFNB31	deafness, autosomal recessive 31 [Source:HGNC Symbol;Acc:16361]	9	q32	-1	117164360	117267730	ENSG00000095397	-	945	7	913	3	22	87.91	0.74	22.81	5.7e-35	0.401336
Correlated	DGCR9	DiGeorge syndrome critical region gene 9 [UniGene: DiGeorge syndrome critical region gene 9]						unknown	-	876	5	848	1	22	81.49	0.57	27.037	3.61e-30	0.385599
Correlated	DGKB	diacylglycerol kinase, beta 90kDa [Source:HGNC Symbol;Acc:2850]	7	p21.2	-1	14184674	15014402	ENSG00000136267	-	937	7	906	2	22	87.16	0.75	25.13	1.23e-38	0.424684
Correlated	DGKE	diacylglycerol kinase, epsilon 64kDa [Source:HGNC Symbol;Acc:2852]	17	q22	1	54911460	54946036	ENSG00000153933	-	1056	8	1013	8	27	98.23	0.76	15.086	7.63e-26	0.323477
Correlated	DGKZ	diacylglycerol kinase, zeta [Source:HGNC Symbol;Acc:2857]	11	p11.2	1	46354455	46402104	ENSG00000149091	-	1071	9	1027	7	28	99.63	0.84	16.282	2.28e-31	0.356006
Correlated	DHCR24	24-dehydrocholesterol reductase [Source:HGNC Symbol;Acc:2859]	1	p32.3	-1	55315306	55352891	ENSG00000116133	-	971	8	929	13	21	90.33	0.82	12.755	1.23e-21	0.30666
Correlated	DHFR	dihydrofolate reductase [Source:HGNC Symbol;Acc:2861]	5	q14.1	-1	79922047	79950802	ENSG00000228716	+	970	13	925	14	18	90.23	1.34	15.066	2.39e-41	0.43245
Correlated	DHRS12	dehydrogenase/reductase (SDR family) member 12 [Source:HGNC Symbol;Acc:25832]	13	q14.3	-1	52342129	52378293	ENSG00000102796	-	1039	8	994	7	30	96.65	0.77	14.582	5.48e-25	0.320294
Correlated	DHRS13	dehydrogenase/reductase (SDR family) member 13 [Source:HGNC Symbol;Acc:28326]	17	q11.2	-1	27224799	27230089	ENSG00000167536	+	1033	7	992	4	30	96.09	0.68	17.767	4.49e-27	0.335264
Correlated	DHRS4-AS1	DHRS4 antisense RNA 1 [UniGene: NA]						unknown	+	1004	7	964	2	31	93.4	0.7	20.55	1.52e-31	0.368768
Correlated	DHRS9	dehydrogenase/reductase (SDR family) member 9 [Source:HGNC Symbol;Acc:16888]	2	q31.1	1	169921299	169952677	ENSG00000073737	-	1045	9	998	12	26	97.21	0.86	12.796	2.83e-24	0.31446
Correlated	DHTKD1	dehydrogenase E1 and transketolase domain containing 1 [Source:HGNC Symbol;Acc:23537]	10	p14	1	12110971	12165224	ENSG00000181192	-	1027	7	987	3	30	95.53	0.68	19.43	1.02e-29	0.353298
Correlated	DHX30	DEAH (Asp-Glu-Ala-His) box helicase 30 [Source:HGNC Symbol;Acc:16716]	3	p21.31	1	47844399	47891685	ENSG00000132153	-	1038	8	995	7	28	96.56	0.77	15.378	2.11e-26	0.330002
Correlated	DHX9	DEAH (Asp-Glu-Ala-His) box helicase 9 [Source:HGNC Symbol;Acc:2750]	1	q25.3	1	182808504	182856886	ENSG00000135829	+	952	7	915	8	22	88.56	0.74	15.32	3.81e-23	0.321146
Correlated	DIAPH2	diaphanous-related formin 2 [Source:HGNC Symbol;Acc:2877]	X	q21.33	1	95939662	96859996	ENSG00000147202	+	949	7	916	4	22	88.28	0.74	20.824	7.78e-32	0.381155
Correlated	DIAPH2	diaphanous-related formin 2 [Source:HGNC Symbol;Acc:2877]	X	q21.33	1	95939662	96859996	ENSG00000147202	-	949	10	907	13	19	88.28	1.05	14.228	4.08e-30	0.37013
Correlated	DIAPH3	diaphanous-related formin 3 [Source:HGNC Symbol;Acc:15480]	13	q21.2	-1	60239717	60738121	ENSG00000139734	+	1046	11	993	18	24	97.3	1.05	11.336	8.37e-26	0.324749
Correlated	DIRAS2	DIRAS family, GTP-binding RAS-like 2 [Source:HGNC Symbol;Acc:19323]	9	q22.2	-1	93372114	93405386	ENSG00000165023	-	1042	10	998	9	25	96.93	0.96	15.669	2.45e-33	0.372704
Correlated	DISP1	dispatched homolog 1 (Drosophila) [Source:HGNC Symbol;Acc:19711]	1	q41	1	222988406	223179337	ENSG00000154309	+	1070	9	1027	6	28	99.53	0.84	17.351	1.52e-33	0.368998
Correlated	DKC1	dyskeratosis congenita 1, dyskerin [Source:HGNC Symbol;Acc:2890]	LRG_55		1	5001	19934	LRG_55	+	975	7	938	6	24	90.7	0.72	16.935	1.04e-25	0.335695
Correlated	DKK3	dickkopf WNT signaling pathway inhibitor 3 [Source:HGNC Symbol;Acc:2893]	11	p15.3	-1	11984653	12031316	ENSG00000050165	-	1071	14	1010	23	24	99.63	1.31	10.664	1.76e-30	0.350633
Correlated	DLEU2	deleted in lymphocytic leukemia 2 (non-protein coding) [Source:HGNC Symbol;Acc:13748]	13	q14.2	-1	50601269	50699856	ENSG00000231607	+	971	11	920	15	25	90.33	1.13	11.411	4.6e-26	0.338861
Correlated	DLG2	discs, large homolog 2 (Drosophila) [Source:HGNC Symbol;Acc:2901]	11	q14.1	-1	83166055	85338966	ENSG00000150672	-	1062	10	1015	11	26	98.79	0.94	14.048	1.14e-29	0.347131
Correlated	DLG3	discs, large homolog 3 (Drosophila) [Source:HGNC Symbol;Acc:2902]	X	q13.1	1	69664711	69725337	ENSG00000082458	-	949	11	915	5	18	88.28	1.16	22.498	0	0.499826
Correlated	DLG4	discs, large homolog 4 (Drosophila) [Source:HGNC Symbol;Acc:2903]	17	p13.1	-1	7093209	7123021	ENSG00000132535	-	955	11	924	0	20	88.84	1.15	30.806	0	0.589339
Correlated	DLG5	discs, large homolog 5 (Drosophila) [Source:HGNC Symbol;Acc:2904]	10	q22.3	-1	79550549	79686378	ENSG00000151208	+	1074	9	1026	11	28	99.91	0.84	13.062	8.18e-25	0.313857
Correlated	DLGAP1	discs, large (Drosophila) homolog-associated protein 1 [Source:HGNC Symbol;Acc:2905]	18	p11.31	-1	3496030	4455335	ENSG00000170579	-	1037	8	993	8	28	96.47	0.77	14.403	1.23e-24	0.318182
Correlated	DLGAP1-AS1	DLGAP1 antisense RNA 1 [UniGene: Uncharacterized LOC649446]						unknown	+	969	8	928	7	26	90.14	0.83	15.2	4.13e-26	0.339542
Correlated	DLGAP1-AS2	DLGAP1 antisense RNA 2 [UniGene: Uncharacterized LOC84777]						unknown	+	963	12	914	14	23	89.58	1.25	12.699	7.54e-32	0.378462
Correlated	DLGAP2	discs, large (Drosophila) homolog-associated protein 2 [Source:HGNC Symbol;Acc:2906]	8	p23.3	1	1449532	1656642	ENSG00000198010	-	934	5	901	3	25	86.88	0.54	19.458	1.28e-21	0.312542
Correlated	DLGAP3	discs, large (Drosophila) homolog-associated protein 3 [Source:HGNC Symbol;Acc:30368]	1	p34.3	-1	35331037	35395186	ENSG00000116544	-	1027	6	991	0	30	95.53	0.58	28.528	5.16e-38	0.402206
Correlated	DLGAP5	discs, large (Drosophila) homolog-associated protein 5 [Source:HGNC Symbol;Acc:16864]	14	q22.3	-1	55614830	55658396	ENSG00000126787	+	964	15	916	19	14	89.67	1.56	14.665	0	0.460162
Correlated	DLST	dihydrolipoamide S-succinyltransferase (E2 component of 2-oxo-glutarate complex) [Source:HGNC Symbol;Acc:2911]	14	q24.3	1	75348594	75370448	ENSG00000119689	-	952	5	922	1	24	88.56	0.53	27.356	1.67e-30	0.37206
Correlated	DMD	dystrophin [Source:HGNC Symbol;Acc:2928]	LRG_199		1	133054	2225382	LRG_199	-	1048	12	1002	9	25	97.49	1.15	16.185	3.17e-41	0.415407
Correlated	DMGDH	dimethylglycine dehydrogenase [Source:HGNC Symbol;Acc:24475]	5	q14.1	-1	78293438	78531861	ENSG00000132837	-	1047	9	1002	7	29	97.4	0.86	15.498	8.18e-30	0.350506
Correlated	DMRT2	doublesex and mab-3 related transcription factor 2 [Source:HGNC Symbol;Acc:2935]	9	p24.3	1	1050354	1057552	ENSG00000173253	-	1034	9	991	8	26	96.19	0.87	15.64	4.55e-30	0.354296
Correlated	DMRT3	doublesex and mab-3 related transcription factor 3 [Source:HGNC Symbol;Acc:13909]	9	p24.3	1	976964	991731	ENSG00000064218	-	1012	5	975	2	30	94.14	0.49	20.653	5.3e-23	0.310444
Correlated	DMTN	dematin actin binding protein [UniGene: NA]						unknown	-	949	9	917	1	22	88.28	0.95	27.552	0	0.503521
Correlated	DMXL2	Dmx-like 2 [Source:HGNC Symbol;Acc:2938]	15	q21.2	-1	51739908	51915030	ENSG00000104093	-	964	7	929	4	24	89.67	0.73	19.789	3.16e-30	0.367951
Correlated	DNAH14	dynein, axonemal, heavy chain 14 [Source:HGNC Symbol;Acc:2945]	1	q42.12	1	225083964	225586996	ENSG00000185842	+	1027	7	986	5	29	95.53	0.68	16.641	2.82e-25	0.324147
Correlated	DNAJA4	DnaJ (Hsp40) homolog, subfamily A, member 4 [Source:HGNC Symbol;Acc:14885]	15	q25.1	1	78556428	78574538	ENSG00000140403	-	1049	13	995	18	23	97.58	1.24	12.22	6.18e-33	0.369087
Correlated	DNAJB4	DnaJ (Hsp40) homolog, subfamily B, member 4 [Source:HGNC Symbol;Acc:14886]	1	p31.1	1	78444859	78483648	ENSG00000162616	-	965	7	929	7	22	89.77	0.73	16.638	3.23e-25	0.333975
Correlated	DNAJB9	DnaJ (Hsp40) homolog, subfamily B, member 9 [Source:HGNC Symbol;Acc:6968]	7	q31.1	1	108210012	108215294	ENSG00000128590	-	975	9	937	7	22	90.7	0.92	17.692	3.13e-34	0.390698
Correlated	DNAJC10	DnaJ (Hsp40) homolog, subfamily C, member 10 [Source:HGNC Symbol;Acc:24637]	2	q32.1	1	183580999	183644334	ENSG00000077232	+	1032	8	986	9	29	96	0.78	13.126	2.45e-22	0.30261
Correlated	DNAJC17	DnaJ (Hsp40) homolog, subfamily C, member 17 [Source:HGNC Symbol;Acc:25556]	15	q15.1	-1	41060067	41099675	ENSG00000104129	+	949	3	920	0	26	88.28	0.32	32.724	1.5e-22	0.317183
Correlated	DNAJC18	DnaJ (Hsp40) homolog, subfamily C, member 18 [Source:HGNC Symbol;Acc:28429]	5	q31.2	-1	138744279	138780180	ENSG00000170464	-	1036	8	994	7	27	96.37	0.77	15.787	3.97e-27	0.335135
Correlated	DNAJC6	DnaJ (Hsp40) homolog, subfamily C, member 6 [Source:HGNC Symbol;Acc:15469]	1	p31.3	1	65713902	65881552	ENSG00000116675	-	949	7	912	6	24	88.28	0.74	16.484	5.15e-25	0.33533
Correlated	DNASE1	deoxyribonuclease I [Source:HGNC Symbol;Acc:2956]	16	p13.3	1	3661729	3730144	ENSG00000213918	-	1051	9	1001	12	29	97.77	0.86	11.853	2.23e-22	0.300153
Correlated	DNM1	dynamin 1 [Source:HGNC Symbol;Acc:2972]	9	q34.11	1	130965658	131017527	ENSG00000106976	-	950	9	909	10	22	88.37	0.95	14.516	8.24e-28	0.354632
Correlated	DNM2	dynamin 2 [Source:HGNC Symbol;Acc:2974]	19	p13.2	1	10828755	10944164	ENSG00000079805	+	968	7	932	4	25	90.05	0.72	19.25	2.17e-29	0.361776
Correlated	DNMT3A	DNA (cytosine-5-)-methyltransferase 3 alpha [Source:HGNC Symbol;Acc:2978]	2	p23.3	-1	25455845	25565459	ENSG00000119772	-	1069	11	1026	7	25	99.44	1.03	18.147	1.07e-42	0.418904
Correlated	DNMT3A	DNA (cytosine-5-)-methyltransferase 3 alpha [Source:HGNC Symbol;Acc:2978]	2	p23.3	-1	25455845	25565459	ENSG00000119772	+	1069	8	1027	6	28	99.44	0.75	16.968	2.99e-29	0.343397
Correlated	DNMT3B	DNA (cytosine-5-)-methyltransferase 3 beta [Source:HGNC Symbol;Acc:2979]	LRG_56		1	5001	51972	LRG_56	-	961	8	926	6	21	89.4	0.83	18.936	8.75e-33	0.384685
Correlated	DOC2A	double C2-like domains, alpha [Source:HGNC Symbol;Acc:2985]	16	p11.2	-1	30016830	30034591	ENSG00000149927	-	936	5	907	0	24	87.07	0.53	32.276	4.58e-36	0.40984
Correlated	DOCK2	dedicator of cytokinesis 2 [Source:HGNC Symbol;Acc:2988]	5	q35.1	1	169064251	169510386	ENSG00000134516	-	962	11	921	12	18	89.49	1.14	15.865	4.48e-37	0.410163
Correlated	DOCK3	dedicator of cytokinesis 3 [Source:HGNC Symbol;Acc:2989]	HG186_PATCH	p21.2	1	50712672	51421329	ENSG00000260587	-	961	7	927	5	22	89.4	0.73	19.33	1.81e-29	0.363598
Correlated	DOCK7	dedicator of cytokinesis 7 [Source:HGNC Symbol;Acc:19190]	1	p31.3	-1	62920399	63153969	ENSG00000116641	+	1063	5	1027	1	30	98.88	0.47	25.31	3.12e-28	0.33795
Correlated	DOCK9	dedicator of cytokinesis 9 [Source:HGNC Symbol;Acc:14132]	13	q32.3	-1	99445741	99738879	ENSG00000088387	+	1072	8	1026	9	29	99.72	0.75	13.634	3.13e-23	0.303237
Correlated	DOK1	docking protein 1, 62kDa (downstream of tyrosine kinase 1) [Source:HGNC Symbol;Acc:2990]	2	p13.1	1	74776153	74784681	ENSG00000115325	-	963	7	927	7	22	89.58	0.73	16.603	3.65e-25	0.333947
Correlated	DOK2	docking protein 2, 56kDa [Source:HGNC Symbol;Acc:2991]	8	p21.3	-1	21766384	21771371	ENSG00000147443	-	932	7	896	8	21	86.7	0.75	15.533	1.74e-23	0.32713
Correlated	DOK4	docking protein 4 [Source:HGNC Symbol;Acc:19868]	16	q21	-1	57505863	57521239	ENSG00000125170	+	944	9	909	5	21	87.81	0.95	20.229	2.15e-39	0.427422
Correlated	DOK6	docking protein 6 [Source:HGNC Symbol;Acc:28301]	18	q22.2	1	67068291	67516323	ENSG00000206052	-	1035	10	991	6	28	96.28	0.97	17.023	1.85e-36	0.391978
Correlated	DPCD	deleted in primary ciliary dyskinesia homolog (mouse) [Source:HGNC Symbol;Acc:24542]	10	q24.32	1	103330317	103369425	ENSG00000166171	+	1060	6	1022	3	29	98.6	0.57	20.19	1.21e-26	0.328154
Correlated	DPEP1	dipeptidase 1 (renal) [Source:HGNC Symbol;Acc:3002]	16	q24.3	1	89679716	89704839	ENSG00000015413	+	921	5	888	3	25	85.67	0.54	19.188	2.53e-21	0.312395
Correlated	DPF1	D4, zinc and double PHD fingers family 1 [Source:HGNC Symbol;Acc:20225]	19	q13.2	-1	38701646	38720354	ENSG00000011332	-	1035	8	998	1	28	96.28	0.77	25.556	8.41e-45	0.436582
Correlated	DPF3	D4, zinc and double PHD fingers, family 3 [Source:HGNC Symbol;Acc:17427]	14	q24.2	-1	73086004	73360809	ENSG00000205683	+	1048	9	1002	8	29	97.49	0.86	14.601	5.54e-28	0.338754
Correlated	DPH6	DPH6 homolog (S. cerevisiae) [UniGene: NA]						unknown	+	1021	7	983	3	28	94.98	0.69	20.42	2.99e-31	0.363889
Correlated	DPP10	dipeptidyl-peptidase 10 (non-functional) [Source:HGNC Symbol;Acc:20823]	2	q14.1	1	115199876	116603328	ENSG00000175497	-	1051	11	1011	3	26	97.77	1.05	22.319	0	0.473166
Correlated	DPP3	dipeptidyl-peptidase 3 [Source:HGNC Symbol;Acc:3008]	11	q13.2	1	66247484	66277130	ENSG00000254986	+	1068	10	1027	4	27	99.35	0.94	20.618	1.68e-44	0.428316
Correlated	DPP6	dipeptidyl-peptidase 6 [Source:HGNC Symbol;Acc:3010]	7	q36.2	1	153584182	154685995	ENSG00000130226	-	1054	12	997	22	23	98.05	1.14	10.629	3.8e-26	0.325798
Correlated	DPPA4	developmental pluripotency associated 4 [Source:HGNC Symbol;Acc:19200]	3	q13.13	-1	109044988	109056419	ENSG00000121570	-	1041	8	1002	3	28	96.84	0.77	21.03	1.27e-36	0.391772
Correlated	DPT	dermatopontin [Source:HGNC Symbol;Acc:3011]	1	q24.2	-1	168664697	168698502	ENSG00000143196	-	928	8	892	8	20	86.33	0.86	16.571	1.53e-28	0.363788
Correlated	DPY19L2	dpy-19-like 2 (C. elegans) [Source:HGNC Symbol;Acc:19414]	12	q14.2	-1	63952693	64062719	ENSG00000177990	-	1002	7	958	6	31	93.21	0.7	14.198	1.91e-21	0.300433
Correlated	DPYSL3	dihydropyrimidinase-like 3 [Source:HGNC Symbol;Acc:3015]	5	q32	-1	146770374	146889619	ENSG00000113657	-	1051	11	1002	13	25	97.77	1.05	13.381	6.93e-31	0.35644
Correlated	DR1	down-regulator of transcription 1, TBP-binding (negative cofactor 2) [Source:HGNC Symbol;Acc:3017]	1	p22.1	1	93811445	93828149	ENSG00000117505	+	969	8	935	5	21	90.14	0.83	20.562	1.05e-35	0.400681
Correlated	DRAM2	DNA-damage regulated autophagy modulator 2 [Source:HGNC Symbol;Acc:28769]	1	p13.3	-1	111659955	111682838	ENSG00000156171	+	1029	5	990	2	32	95.72	0.49	19.865	3.95e-22	0.301524
Correlated	DRP2	dystrophin related protein 2 [Source:HGNC Symbol;Acc:3032]	X	q22.1	1	100474758	100519486	ENSG00000102385	-	933	6	899	5	23	86.79	0.64	17.549	4.65e-23	0.323748
Correlated	DSCR10	Down syndrome critical region gene 10 (non-protein coding) [Source:HGNC Symbol;Acc:16302]	21	q22.13	1	39578250	39580738	ENSG00000233316	-	825	4	797	0	24	76.74	0.48	29.464	1.06e-26	0.372399
Correlated	DSTN	destrin (actin depolymerizing factor) [Source:HGNC Symbol;Acc:15750]	20	p12.1	1	17550508	17588887	ENSG00000125868	+	1068	7	1028	5	28	99.35	0.66	17.8	4.62e-27	0.329649
Correlated	DTNB	dystrobrevin, beta [Source:HGNC Symbol;Acc:3058]	2	p23.3	-1	25600067	25896503	ENSG00000138101	-	960	7	925	6	22	89.3	0.73	17.825	4.29e-27	0.347916
Correlated	DTX1	deltex homolog 1 (Drosophila) [Source:HGNC Symbol;Acc:3060]	12	q24.13	1	113494514	113535833	ENSG00000135144	-	1042	8	1000	6	28	96.93	0.77	16.54	1.68e-28	0.343054
Correlated	DTX2	deltex homolog 2 (Drosophila) [Source:HGNC Symbol;Acc:15973]	7	q11.23	1	76090993	76135312	ENSG00000091073	-	913	5	883	2	23	84.93	0.55	23.291	6.24e-26	0.348512
Correlated	DTYMK	deoxythymidylate kinase (thymidylate kinase) [Source:HGNC Symbol;Acc:3061]	2	q37.3	-1	242615157	242626406	ENSG00000168393	+	957	7	921	5	24	89.02	0.73	18.008	2.03e-27	0.350675
Correlated	DUSP10	dual specificity phosphatase 10 [Source:HGNC Symbol;Acc:3065]	1	q41	-1	221874766	221915518	ENSG00000143507	-	967	7	932	6	22	89.95	0.72	17.955	2.71e-27	0.348009
Correlated	DUSP14	dual specificity phosphatase 14 [Source:HGNC Symbol;Acc:17007]	17	q12	1	35849937	35873603	ENSG00000161326	-	965	7	931	5	22	89.77	0.73	19.411	1.37e-29	0.363648
Correlated	DUSP2	dual specificity phosphatase 2 [Source:HGNC Symbol;Acc:3068]	2	q11.2	-1	96808905	96811179	ENSG00000158050	-	949	10	903	15	21	88.28	1.05	12.245	1.17e-25	0.339906
Correlated	DUSP22	dual specificity phosphatase 22 [Source:HGNC Symbol;Acc:16077]	6	p25.3	1	291630	351355	ENSG00000112679	-	1071	7	1030	4	30	99.63	0.65	18.42	4.47e-28	0.335688
Correlated	DUSP26	dual specificity phosphatase 26 (putative) [Source:HGNC Symbol;Acc:28161]	8	p12	-1	33448856	33457624	ENSG00000133878	-	932	6	902	1	23	86.7	0.64	27.547	1.36e-36	0.413852
Correlated	DUSP27	dual specificity phosphatase 27 (putative) [Source:HGNC Symbol;Acc:25034]	1	q24.1	1	167063282	167098402	ENSG00000198842	+	1019	5	983	1	30	94.79	0.49	24.262	4.37e-27	0.337639
Correlated	DUSP3	dual specificity phosphatase 3 [Source:HGNC Symbol;Acc:3069]	17	q21.31	-1	41843489	41856356	ENSG00000108861	-	977	8	936	10	23	90.88	0.82	14.007	6.56e-24	0.322586
Correlated	DUSP8	dual specificity phosphatase 8 [Source:HGNC Symbol;Acc:3074]	11	p15.5	-1	1575274	1593150	ENSG00000184545	-	1071	7	1031	3	30	99.63	0.65	20.262	5.41e-31	0.353743
Correlated	DYDC2	DPY30 domain containing 2 [Source:HGNC Symbol;Acc:23468]	10	q23.1	1	82104501	82127829	ENSG00000133665	-	1008	7	969	5	27	93.77	0.69	17.294	2.7e-26	0.334158
Correlated	DYM	dymeclin [Source:HGNC Symbol;Acc:21317]	18	q21.1	-1	46570039	46987717	ENSG00000141627	-	1059	6	1021	2	30	98.51	0.57	22.062	3.33e-29	0.34472
Correlated	DYNC2H1	dynein, cytoplasmic 2, heavy chain 1 [Source:HGNC Symbol;Acc:2962]	11	q22.3	1	102980160	103350591	ENSG00000187240	+	924	7	891	4	22	85.95	0.76	20.276	5.39e-31	0.380857
Correlated	DYNLRB1	dynein, light chain, roadblock-type 1 [Source:HGNC Symbol;Acc:15468]	20	q11.22	1	33104214	33128762	ENSG00000125971	+	948	5	917	2	24	88.19	0.53	23.35	5.46e-26	0.342427
Correlated	DYRK2	dual-specificity tyrosine-(Y)-phosphorylation regulated kinase 2 [Source:HGNC Symbol;Acc:3093]	12	q15	1	68042118	68059186	ENSG00000127334	+	967	8	927	8	24	89.95	0.83	15.109	6.4e-26	0.338569
Correlated	DYRK3	dual-specificity tyrosine-(Y)-phosphorylation regulated kinase 3 [Source:HGNC Symbol;Acc:3094]	HG1293_PATCH	q32.1	1	206699097	206747980	ENSG00000265184	+	972	8	932	9	23	90.42	0.82	14.755	2.9e-25	0.333101
Correlated	DYSF	dysferlin, limb girdle muscular dystrophy 2B (autosomal recessive) [Source:HGNC Symbol;Acc:3097]	2	p13.2	1	71680852	71913898	ENSG00000135636	-	963	8	933	1	21	89.58	0.83	29.517	0	0.488068
Correlated	DZIP1	DAZ interacting zinc finger protein 1 [Source:HGNC Symbol;Acc:20908]	13	q32.1	-1	96230457	96296957	ENSG00000134874	-	964	10	927	8	19	89.67	1.04	18.467	1.22e-39	0.424339
Correlated	E2F5	E2F transcription factor 5, p130-binding [Source:HGNC Symbol;Acc:3119]	8	q21.2	1	86089460	86129387	ENSG00000133740	+	965	7	930	6	22	89.77	0.73	17.918	3.09e-27	0.347983
Correlated	E2F8	E2F transcription factor 8 [Source:HGNC Symbol;Acc:24727]	11	p15.1	-1	19245610	19263167	ENSG00000129173	+	943	15	903	12	13	87.72	1.59	18.71	0	0.531899
Correlated	EBF1	early B-cell factor 1 [Source:HGNC Symbol;Acc:3126]	5	q33.3	-1	158122928	158526769	ENSG00000164330	+	1052	12	993	21	26	97.86	1.14	10.067	1.25e-24	0.315868
Correlated	EBI3	Epstein-Barr virus induced 3 [Source:HGNC Symbol;Acc:3129]	19	p13.3	1	4229495	4237528	ENSG00000105246	-	922	6	889	3	24	85.77	0.65	20.489	4.52e-27	0.354855
Correlated	ECE2	endothelin converting enzyme 2 [Source:HGNC Symbol;Acc:13275]	3	q27.1	1	183967438	184010819	ENSG00000145194	+	1067	10	1024	5	28	99.26	0.94	18.719	2.96e-40	0.406601
Correlated	ECHDC3	enoyl CoA hydratase domain containing 3 [Source:HGNC Symbol;Acc:23489]	10	p14	1	11784365	11806069	ENSG00000134463	-	938	10	897	10	21	87.26	1.07	15.129	3.54e-32	0.385552
Correlated	ECI1	enoyl-CoA delta isomerase 1 [Source:HGNC Symbol;Acc:2703]	16	p13.3	-1	2289396	2302301	ENSG00000167969	+	955	5	921	2	27	88.84	0.52	21.317	9.6e-24	0.325071
Correlated	ECM2	extracellular matrix protein 2, female organ and adipocyte specific [Source:HGNC Symbol;Acc:3154]	9	q22.31	-1	95256365	95298937	ENSG00000106823	-	963	7	928	4	24	89.58	0.73	19.768	3.4e-30	0.367939
Correlated	ECSCR	endothelial cell surface expressed chemotaxis and apoptosis regulator [Source:HGNC Symbol;Acc:35454]	5	q31.2	-1	138784245	138842328	ENSG00000249751	-	1006	7	965	6	28	93.58	0.7	15.477	1.97e-23	0.314483
Correlated	ECT2	epithelial cell transforming sequence 2 oncogene [Source:HGNC Symbol;Acc:3155]	3	q26.31	1	172468472	172539264	ENSG00000114346	+	1051	14	999	16	22	97.77	1.33	13.624	7.49e-40	0.407536
Correlated	EDNRA	endothelin receptor type A [Source:HGNC Symbol;Acc:3179]	4	q31.22	1	148402069	148466106	ENSG00000151617	+	932	10	884	17	21	86.7	1.07	11.135	3.65e-23	0.324713
Correlated	EDNRB	endothelin receptor type B [Source:HGNC Symbol;Acc:3180]	13	q22.3	-1	78469616	78493903	ENSG00000136160	-	951	10	906	14	21	88.47	1.05	12.782	7.22e-27	0.348002
Correlated	EEF1A2	eukaryotic translation elongation factor 1 alpha 2 [Source:HGNC Symbol;Acc:3192]	20	q13.33	-1	62119366	62130505	ENSG00000101210	-	944	6	909	6	23	87.81	0.64	16.276	2.51e-21	0.308586
Correlated	EEF1E1	eukaryotic translation elongation factor 1 epsilon 1 [Source:HGNC Symbol;Acc:3212]	6	p24.3	-1	8073593	8102811	ENSG00000124802	+	969	6	935	5	23	90.14	0.62	18.226	5.98e-24	0.324209
Correlated	EFCAB11	EF-hand calcium binding domain 11 [Source:HGNC Symbol;Acc:20357]	14	q32.11	-1	90261013	90421121	ENSG00000140025	+	944	5	910	3	26	87.81	0.53	19.032	3.79e-21	0.307187
Correlated	EFCAB3	EF-hand calcium binding domain 3 [Source:HGNC Symbol;Acc:26379]	17	q23.2	1	60447579	60493837	ENSG00000172421	+	875	5	843	4	23	81.4	0.57	17.361	2.95e-19	0.303258
Correlated	EFCC1	EF-hand and coiled-coil domain containing 1 [UniGene: NA]						unknown	-	1017	4	982	0	31	94.6	0.39	29.057	2.55e-26	0.332849
Correlated	EFEMP2	EGF containing fibulin-like extracellular matrix protein 2 [Source:HGNC Symbol;Acc:3219]	11	q13.1	-1	65633912	65641063	ENSG00000172638	-	940	6	904	5	25	87.44	0.64	16.54	1.03e-21	0.312268
Correlated	EFNA1	ephrin-A1 [Source:HGNC Symbol;Acc:3221]	1	q22	1	155099936	155107333	ENSG00000169242	+	949	11	904	14	20	88.28	1.16	13.47	3.61e-31	0.37692
Correlated	EFNA4	ephrin-A4 [Source:HGNC Symbol;Acc:3224]	1	q22	1	155036207	155042029	ENSG00000243364	+	952	12	922	2	16	88.56	1.26	29.143	0	0.598513
Correlated	EGF	epidermal growth factor [Source:HGNC Symbol;Acc:3229]	4	q25	1	110834040	110933422	ENSG00000138798	-	937	7	904	4	22	87.16	0.75	20.561	1.97e-31	0.381014
Correlated	EGFEM1P	EGF-like and EMI domain containing 1, pseudogene [Source:HGNC Symbol;Acc:25149]	3	q26.2	1	167967310	168548387	ENSG00000206120	+	906	7	876	1	22	84.28	0.77	27.336	3.7e-42	0.452022
Correlated	EGFL7	EGF-like-domain, multiple 7 [Source:HGNC Symbol;Acc:20594]	9	q34.3	1	139553308	139567130	ENSG00000172889	-	963	7	929	5	22	89.58	0.73	19.371	1.57e-29	0.363623
Correlated	EGLN1	egl nine homolog 1 (C. elegans) [Source:HGNC Symbol;Acc:1232]	1	q42.2	-1	231499497	231560790	ENSG00000135766	+	1048	9	1000	12	27	97.49	0.86	12.476	1.25e-23	0.309516
Correlated	EGR4	early growth response 4 [Source:HGNC Symbol;Acc:3241]	2	p13.1	-1	73518058	73520833	ENSG00000135625	-	1022	7	987	0	28	95.07	0.68	29.2	4.2e-45	0.441002
Correlated	EHBP1L1	EH domain binding protein 1-like 1 [Source:HGNC Symbol;Acc:30682]	11	q13.1	1	65343509	65360121	ENSG00000173442	+	905	7	868	7	23	84.19	0.77	15.083	8.07e-23	0.326879
Correlated	EHD2	EH-domain containing 2 [Source:HGNC Symbol;Acc:3243]	19	q13.33	1	48216600	48246391	ENSG00000024422	-	949	10	905	15	19	88.28	1.05	13.09	1.49e-27	0.353064
Correlated	EHD3	EH-domain containing 3 [Source:HGNC Symbol;Acc:3244]	2	p23.1	1	31456880	31492313	ENSG00000013016	-	1051	9	1003	12	27	97.77	0.86	12.512	1.06e-23	0.309568
Correlated	EHMT1	euchromatic histone-lysine N-methyltransferase 1 [Source:HGNC Symbol;Acc:24650]	9	q34.3	1	140513444	140764468	ENSG00000181090	-	1041	7	999	6	29	96.84	0.67	15.571	1.44e-23	0.310112
Correlated	EIF1	eukaryotic translation initiation factor 1 [Source:HGNC Symbol;Acc:3249]	17	q21.2	1	39845137	39848920	ENSG00000173812	-	1071	10	1020	14	27	99.63	0.93	12.061	3.5e-25	0.316782
Correlated	EIF3A	eukaryotic translation initiation factor 3, subunit A [Source:HGNC Symbol;Acc:3271]	10	q26.11	-1	120794356	120840396	ENSG00000107581	+	963	5	932	1	25	89.58	0.52	26.75	7.79e-30	0.365609
Correlated	EIF3C	eukaryotic translation initiation factor 3, subunit C [Source:HGNC Symbol;Acc:3279]	16	p11.2	1	28699879	28747051	ENSG00000184110	+	1044	6	1005	3	30	97.12	0.57	19.333	1.64e-25	0.323083
Correlated	EIF4E	eukaryotic translation initiation factor 4E [Source:HGNC Symbol;Acc:3287]	4	q23	-1	99792835	99851788	ENSG00000151247	-	1064	10	1015	11	28	98.98	0.94	13.333	4.47e-28	0.336795
Correlated	EIF4E2	eukaryotic translation initiation factor 4E family member 2 [Source:HGNC Symbol;Acc:3293]	2	q37.1	1	233414762	233448354	ENSG00000135930	+	1072	7	1029	5	31	99.72	0.65	16.456	5.6e-25	0.315261
Correlated	EIF4E3	eukaryotic translation initiation factor 4E family member 3 [Source:HGNC Symbol;Acc:31837]	3	p13	-1	71728440	71803924	ENSG00000163412	-	1036	10	989	9	28	96.37	0.97	14.349	2.1e-30	0.356035
Correlated	EIF4EBP1	eukaryotic translation initiation factor 4E binding protein 1 [Source:HGNC Symbol;Acc:3288]	8	p11.23	1	37887859	37917883	ENSG00000187840	+	976	14	939	6	17	90.79	1.43	22.039	0	0.55115
Correlated	EIF4EBP2	eukaryotic translation initiation factor 4E binding protein 2 [Source:HGNC Symbol;Acc:3289]	10	q22.1	1	72164135	72188374	ENSG00000148730	+	1073	8	1028	8	29	99.81	0.75	14.5	8.5e-25	0.31389
Correlated	EIF4G3	eukaryotic translation initiation factor 4 gamma, 3 [Source:HGNC Symbol;Acc:3298]	1	p36.12	-1	21132963	21503377	ENSG00000075151	+	965	6	929	5	25	89.77	0.62	16.979	2.71e-22	0.312602
Correlated	EIF4H	eukaryotic translation initiation factor 4H [Source:HGNC Symbol;Acc:12741]	HG1257_PATCH	q11.23	1	73639202	73662058	ENSG00000263344	+	1061	6	1022	4	29	98.7	0.57	18.189	6.32e-24	0.30967
Correlated	EIF5A2	eukaryotic translation initiation factor 5A2 [Source:HGNC Symbol;Acc:3301]	3	q26.2	-1	170606204	170626482	ENSG00000163577	+	1061	9	1012	13	27	98.7	0.85	12.057	9.09e-23	0.301525
Correlated	ELAVL1	ELAV (embryonic lethal, abnormal vision, Drosophila)-like 1 (Hu antigen R) [Source:HGNC Symbol;Acc:3312]	19	p13.2	-1	8023463	8070543	ENSG00000066044	-	1069	8	1024	8	29	99.44	0.75	14.446	1.06e-24	0.313833
Correlated	ELAVL1	ELAV (embryonic lethal, abnormal vision, Drosophila)-like 1 (Hu antigen R) [Source:HGNC Symbol;Acc:3312]	19	p13.2	-1	8023463	8070543	ENSG00000066044	+	1069	9	1029	3	28	99.44	0.84	21.669	2.52e-42	0.416996
Correlated	ELAVL2	ELAV (embryonic lethal, abnormal vision, Drosophila)-like 2 (Hu antigen B) [Source:HGNC Symbol;Acc:3313]	9	p21.3	-1	23690102	23826335	ENSG00000107105	-	1033	9	990	8	26	96.09	0.87	15.625	4.87e-30	0.354281
Correlated	ELAVL3	ELAV (embryonic lethal, abnormal vision, Drosophila)-like 3 (Hu antigen C) [Source:HGNC Symbol;Acc:3314]	19	p13.2	-1	11562141	11591861	ENSG00000196361	-	1050	7	1012	3	28	97.67	0.67	21	3.87e-32	0.364179
Correlated	ELAVL4	ELAV (embryonic lethal, abnormal vision, Drosophila)-like 4 [Source:HGNC Symbol;Acc:3315]	1	p33	1	50513686	50669458	ENSG00000162374	-	1061	8	1015	9	29	98.7	0.75	13.494	5.51e-23	0.303069
Correlated	ELF4	E74-like factor 4 (ets domain transcription factor) [Source:HGNC Symbol;Acc:3319]	LRG_335		1	5214	50794	LRG_335	+	971	10	936	4	21	90.33	1.03	22.373	0	0.469457
Correlated	ELFN2	extracellular leucine-rich repeat and fibronectin type III domain containing 2 [Source:HGNC Symbol;Acc:29396]	22	q13.1	-1	37764000	37823505	ENSG00000166897	-	908	9	869	10	20	84.47	0.99	14.831	1.81e-28	0.367275
Correlated	ELK3	ELK3, ETS-domain protein (SRF accessory protein 2) [Source:HGNC Symbol;Acc:3325]	12	q23.1	1	96588160	96663613	ENSG00000111145	-	967	10	932	6	19	89.95	1.03	20.841	5.61e-45	0.452502
Correlated	ELL3	elongation factor RNA polymerase II-like 3 [Source:HGNC Symbol;Acc:23113]	15	q15.3	-1	44064798	44069741	ENSG00000128886	+	950	7	917	2	24	88.37	0.74	23.835	1.24e-36	0.41016
Correlated	ELMO1	engulfment and cell motility 1 [Source:HGNC Symbol;Acc:16286]	7	p14.1	-1	36893961	37488852	ENSG00000155849	-	949	8	908	12	21	88.28	0.84	13.09	2.96e-22	0.314939
Correlated	ELMO2	engulfment and cell motility 2 [Source:HGNC Symbol;Acc:17233]	20	q13.12	-1	44994688	45061704	ENSG00000062598	-	920	7	884	6	23	85.58	0.76	16.513	4.53e-25	0.340976
Correlated	ELMOD1	ELMO/CED-12 domain containing 1 [Source:HGNC Symbol;Acc:25334]	11	q22.3	1	107461817	107537505	ENSG00000110675	-	1038	8	1000	3	27	96.56	0.77	21.569	1.41e-37	0.397653
Correlated	ELN	elastin [Source:HGNC Symbol;Acc:3327]	HG1257_PATCH	q11.23	1	73492746	73534864	ENSG00000262184	+	948	7	911	8	22	88.19	0.74	15.255	4.79e-23	0.321084
Correlated	ELOVL4	ELOVL fatty acid elongase 4 [Source:HGNC Symbol;Acc:14415]	6	q14.1	-1	80624529	80657297	ENSG00000118402	-	942	10	910	2	20	87.63	1.06	26.167	0	0.518487
Correlated	ELOVL6	ELOVL fatty acid elongase 6 [Source:HGNC Symbol;Acc:15829]	4	q25	-1	110967002	111120355	ENSG00000170522	+	1071	10	1018	15	28	99.63	0.93	11.274	2.08e-23	0.30463
Correlated	EMC9	ER membrane protein complex subunit 9 [UniGene: NA]						unknown	+	969	5	939	1	24	90.14	0.52	27.845	4.87e-31	0.372184
Correlated	EME2	essential meiotic structure-specific endonuclease subunit 2 [Source:HGNC Symbol;Acc:27289]	16	p13.3	1	1823208	1831709	ENSG00000197774	-	889	5	859	1	24	82.7	0.56	25.546	1.6e-28	0.371557
Correlated	EML1	echinoderm microtubule associated protein like 1 [Source:HGNC Symbol;Acc:3330]	14	q32.2	1	100204030	100408397	ENSG00000066629	-	967	8	931	7	21	89.95	0.83	17.784	1.05e-30	0.37044
Correlated	EML2	echinoderm microtubule associated protein like 2 [Source:HGNC Symbol;Acc:18035]	19	q13.32	-1	46110252	46148887	ENSG00000125746	-	1067	8	1025	7	27	99.26	0.75	16.259	5.9e-28	0.335552
Correlated	EML3	echinoderm microtubule associated protein like 3 [Source:HGNC Symbol;Acc:26666]	11	q12.3	-1	62369690	62380237	ENSG00000149499	-	930	7	894	5	24	86.51	0.75	17.5	1.22e-26	0.350311
Correlated	EML4	echinoderm microtubule associated protein like 4 [Source:HGNC Symbol;Acc:1316]	2	p21	1	42396490	42559688	ENSG00000143924	+	1071	11	1021	12	27	99.63	1.03	13.479	3.93e-31	0.354584
Correlated	EMP1	epithelial membrane protein 1 [Source:HGNC Symbol;Acc:3333]	12	p13.1	1	13349650	13369708	ENSG00000134531	-	954	13	901	22	18	88.74	1.36	11.43	1.02e-30	0.373042
Correlated	EMP2	epithelial membrane protein 2 [Source:HGNC Symbol;Acc:3334]	16	p13.13	-1	10622279	10674555	ENSG00000213853	+	1060	9	1014	9	28	98.6	0.85	14.324	2.14e-27	0.333051
Correlated	EMX1	empty spiracles homeobox 1 [Source:HGNC Symbol;Acc:3340]	2	p13.2	1	73143389	73162020	ENSG00000135638	-	901	6	867	3	25	83.81	0.67	19.376	1.34e-25	0.348433
Correlated	EMX2	empty spiracles homeobox 2 [Source:HGNC Symbol;Acc:3341]	10	q26.11	1	119301955	119309056	ENSG00000170370	-	925	7	887	8	23	86.05	0.76	14.389	1.05e-21	0.314716
Correlated	EN1	engrailed homeobox 1 [Source:HGNC Symbol;Acc:3342]	2	q14.2	-1	119599747	119605254	ENSG00000163064	+	930	6	897	5	22	86.51	0.65	18.117	8.14e-24	0.329943
Correlated	EN2	engrailed homeobox 2 [Source:HGNC Symbol;Acc:3343]	7	q36.3	1	155250824	155257526	ENSG00000164778	+	931	4	900	1	26	86.6	0.43	24.827	1.88e-22	0.319478
Correlated	ENAH	enabled homolog (Drosophila) [Source:HGNC Symbol;Acc:18271]	1	q42.12	-1	225677502	225840844	ENSG00000154380	+	1067	14	1018	11	24	99.26	1.31	15.724	0	0.438281
Correlated	ENG	endoglin [Source:HGNC Symbol;Acc:3349]	9	q34.11	-1	130577291	130617035	ENSG00000106991	-	942	9	906	7	20	87.63	0.96	18.272	2.07e-35	0.404622
Correlated	ENKD1	enkurin domain containing 1 [UniGene: NA]						unknown	+	1040	7	1003	2	28	96.74	0.67	23.111	1.73e-35	0.385526
Correlated	ENPEP	glutamyl aminopeptidase (aminopeptidase A) [Source:HGNC Symbol;Acc:3355]	4	q25	1	111286889	111486441	ENSG00000138792	+	930	5	896	3	26	86.51	0.54	18.75	7.74e-21	0.307029
Correlated	ENPP1	ectonucleotide pyrophosphatase/phosphodiesterase 1 [Source:HGNC Symbol;Acc:3356]	6	q23.2	1	132129156	132216295	ENSG00000197594	-	1064	16	1011	16	21	98.98	1.5	14.378	0	0.447151
Correlated	ENPP1	ectonucleotide pyrophosphatase/phosphodiesterase 1 [Source:HGNC Symbol;Acc:3356]	6	q23.2	1	132129156	132216295	ENSG00000197594	+	1064	9	1019	8	28	98.98	0.85	15.224	3.19e-29	0.344028
Correlated	ENPP2	ectonucleotide pyrophosphatase/phosphodiesterase 2 [Source:HGNC Symbol;Acc:3357]	8	q24.12	-1	120569326	120685693	ENSG00000136960	-	939	11	902	8	18	87.35	1.17	18.746	3.08e-44	0.45526
Correlated	ENPP6	ectonucleotide pyrophosphatase/phosphodiesterase 6 [Source:HGNC Symbol;Acc:23409]	4	q35.1	-1	185009859	185142383	ENSG00000164303	-	1017	8	975	6	28	94.6	0.79	16.143	8.33e-28	0.342719
Correlated	ENSA	endosulfine alpha [Source:HGNC Symbol;Acc:3360]	1	q21.3	-1	150573327	150602088	ENSG00000143420	+	1061	13	1017	6	25	98.7	1.23	19.104	0	0.47116
Correlated	ENTPD1	ectonucleoside triphosphate diphosphohydrolase 1 [Source:HGNC Symbol;Acc:3363]	10	q24.1	1	97471536	97637023	ENSG00000138185	+	1039	12	985	18	24	96.65	1.15	11.544	1.21e-28	0.344461
Correlated	ENTPD3	ectonucleoside triphosphate diphosphohydrolase 3 [Source:HGNC Symbol;Acc:3365]	3	p22.1	1	40428647	40470110	ENSG00000168032	+	951	6	918	4	23	88.47	0.63	19.676	6.31e-26	0.341444
Correlated	ENTPD3	ectonucleoside triphosphate diphosphohydrolase 3 [Source:HGNC Symbol;Acc:3365]	3	p22.1	1	40428647	40470110	ENSG00000168032	-	951	7	916	6	22	88.47	0.74	17.658	7.74e-27	0.347794
Correlated	ENTPD4	ectonucleoside triphosphate diphosphohydrolase 4 [Source:HGNC Symbol;Acc:14573]	8	p21.2	-1	23243296	23315208	ENSG00000197217	-	977	6	944	2	25	90.88	0.61	23.637	2.63e-31	0.372339
Correlated	ENTPD5	ectonucleoside triphosphate diphosphohydrolase 5 [Source:HGNC Symbol;Acc:3367]	14	q24.3	-1	74424713	74486102	ENSG00000187097	-	1054	9	1010	6	29	98.05	0.85	16.642	3.88e-32	0.363478
Correlated	ENTPD6	ectonucleoside triphosphate diphosphohydrolase 6 (putative) [Source:HGNC Symbol;Acc:3368]	20	p11.21	1	25176329	25207365	ENSG00000197586	+	1046	5	1009	2	30	97.3	0.48	21.347	9.19e-24	0.310741
Correlated	EPB41	erythrocyte membrane protein band 4.1 (elliptocytosis 1, RH-linked) [Source:HGNC Symbol;Acc:3377]	1	p35.3	1	29213603	29446553	ENSG00000159023	+	1070	9	1027	6	28	99.53	0.84	17.351	1.52e-33	0.368998
Correlated	EPB41L1	erythrocyte membrane protein band 4.1-like 1 [Source:HGNC Symbol;Acc:3378]	20	q11.23	1	34679426	34820721	ENSG00000088367	-	1058	9	1012	11	26	98.42	0.85	13.603	6.62e-26	0.32358
Correlated	EPB41L3	erythrocyte membrane protein band 4.1-like 3 [Source:HGNC Symbol;Acc:3380]	18	p11.31	-1	5392383	5630699	ENSG00000082397	-	971	12	923	17	19	90.33	1.24	12.961	1.58e-32	0.381119
Correlated	EPB41L4A	erythrocyte membrane protein band 4.1 like 4A [Source:HGNC Symbol;Acc:13278]	5	q22.2	-1	111478138	111755013	ENSG00000129595	+	1064	12	1019	7	26	98.98	1.13	17.684	2.8e-45	0.432955
Correlated	EPB41L4B	erythrocyte membrane protein band 4.1 like 4B [Source:HGNC Symbol;Acc:19818]	9	q31.3	-1	111934255	112083244	ENSG00000095203	-	1068	16	1016	15	21	99.35	1.5	14.898	0	0.455214
Correlated	EPB41L5	erythrocyte membrane protein band 4.1 like 5 [Source:HGNC Symbol;Acc:19819]	2	q14.2	1	120770581	120936695	ENSG00000115109	+	1067	8	1023	7	29	99.26	0.75	15.38	2.14e-26	0.32545
Correlated	EPCAM	epithelial cell adhesion molecule [Source:HGNC Symbol;Acc:11529]	LRG_215		1	28986	46866	LRG_215	+	931	6	897	5	23	86.6	0.64	17.511	5.21e-23	0.323721
Correlated	EPDR1	ependymin related protein 1 (zebrafish) [Source:HGNC Symbol;Acc:17572]	7	p14.1	1	37723446	37991543	ENSG00000086289	-	1056	8	1012	9	27	98.23	0.76	14.198	3.07e-24	0.312577
Correlated	EPHA5	EPH receptor A5 [Source:HGNC Symbol;Acc:3389]	4	q13.1	-1	66185281	66536213	ENSG00000145242	-	1036	7	995	6	28	96.37	0.68	15.938	3.85e-24	0.314888
Correlated	EPHB4	EPH receptor B4 [Source:HGNC Symbol;Acc:3395]	7	q22.1	-1	100400187	100425121	ENSG00000196411	+	975	8	940	4	23	90.7	0.82	20.968	1.8e-36	0.403926
Correlated	EPHX1	epoxide hydrolase 1, microsomal (xenobiotic) [Source:HGNC Symbol;Acc:3401]	1	q42.12	1	225997794	226033260	ENSG00000143819	-	951	9	915	5	22	88.47	0.95	19.721	2.23e-38	0.420063
Correlated	EPM2A	epilepsy, progressive myoclonus type 2A, Lafora disease (laforin) [Source:HGNC Symbol;Acc:3413]	6	q24.3	-1	145822719	146057160	ENSG00000112425	+	961	5	930	1	25	89.4	0.52	26.694	8.96e-30	0.365594
Correlated	EPPK1	epiplakin 1 [Source:HGNC Symbol;Acc:15577]	HG104_HG975_PATCH	q24.3	-1	144940157	144955423	ENSG00000261150	+	1023	11	976	11	25	95.16	1.08	14.208	5.68e-33	0.373968
Correlated	EPS15	epidermal growth factor receptor pathway substrate 15 [Source:HGNC Symbol;Acc:3419]	1	p32.3	-1	51819935	51985000	ENSG00000085832	-	977	7	939	6	25	90.88	0.72	16.44	6.16e-25	0.329941
Correlated	EPS8L1	EPS8-like 1 [Source:HGNC Symbol;Acc:21295]	HG1079_PATCH	q13.42	1	55575275	55591178	ENSG00000270836	+	960	8	924	6	22	89.3	0.83	18.286	1.24e-31	0.377681
Correlated	EPS8L3	EPS8-like 3 [Source:HGNC Symbol;Acc:21297]	1	p13.3	-1	110292702	110306649	ENSG00000198758	+	948	4	919	1	24	88.19	0.42	27.086	1.93e-24	0.331373
Correlated	ERAP1	endoplasmic reticulum aminopeptidase 1 [Source:HGNC Symbol;Acc:18173]	5	q15	-1	96096521	96143803	ENSG00000164307	-	924	8	883	11	22	85.95	0.87	12.968	4.62e-22	0.317674
Correlated	ERAP1	endoplasmic reticulum aminopeptidase 1 [Source:HGNC Symbol;Acc:18173]	5	q15	-1	96096521	96143803	ENSG00000164307	+	924	8	883	11	22	85.95	0.87	12.968	4.62e-22	0.317674
Correlated	ERC1	ELKS/RAB6-interacting/CAST family member 1 [Source:HGNC Symbol;Acc:17072]	12	p13.33	1	1099675	1605099	ENSG00000082805	+	1063	9	1015	10	29	98.88	0.85	13.251	3.23e-25	0.318212
Correlated	ERCC6L	excision repair cross-complementing rodent repair deficiency, complementation group 6-like [Source:HGNC Symbol;Acc:20794]	X	q13.1	-1	71424510	71458897	ENSG00000186871	+	861	8	826	7	20	80.09	0.93	16.4	2.69e-28	0.375957
Correlated	ERCC6L2	excision repair cross-complementing rodent repair deficiency, complementation group 6-like 2 [UniGene: NA]						unknown	+	1071	6	1031	2	32	99.63	0.56	21.138	5.59e-28	0.335073
Correlated	ERG	v-ets avian erythroblastosis virus E26 oncogene homolog [Source:HGNC Symbol;Acc:3446]	21	q22.2	-1	39751949	40033704	ENSG00000157554	-	1057	10	1010	9	28	98.33	0.95	14.64	4.86e-31	0.356364
Correlated	ERGIC3	ERGIC and golgi 3 [Source:HGNC Symbol;Acc:15927]	20	q11.22	1	34129770	34145405	ENSG00000125991	+	937	6	905	1	25	87.16	0.64	25.908	2e-34	0.399724
Correlated	ERI1	exoribonuclease 1 [Source:HGNC Symbol;Acc:23994]	8	p23.1	1	8859657	8974256	ENSG00000104626	+	1053	8	1007	9	29	97.95	0.76	13.393	8.32e-23	0.302945
Correlated	ERI2	ERI1 exoribonuclease family member 2 [Source:HGNC Symbol;Acc:30541]	16	p12.3	-1	20791515	20911671	ENSG00000196678	+	1063	6	1025	2	30	98.88	0.56	22.146	2.59e-29	0.344754
Correlated	ERICH1	glutamate-rich 1 [Source:HGNC Symbol;Acc:27234]	8	p23.3	-1	564746	688106	ENSG00000104714	+	1042	11	985	19	27	96.93	1.06	10.054	1.24e-22	0.303287
Correlated	ERICH1-AS1	ERICH1 antisense RNA 1 [UniGene: NA]						unknown	-	871	6	837	7	21	81.02	0.69	14.889	1.81e-19	0.305778
Correlated	ERLEC1	endoplasmic reticulum lectin 1 [Source:HGNC Symbol;Acc:25222]	2	p16.2	1	54014181	54045956	ENSG00000068912	-	1043	5	1004	2	32	97.02	0.48	20.135	2e-22	0.301649
Correlated	ERMAP	erythroblast membrane-associated protein (Scianna blood group) [Source:HGNC Symbol;Acc:15743]	1	p34.2	1	43282795	43310660	ENSG00000164010	+	942	7	910	2	23	87.63	0.74	24.422	1.53e-37	0.417226
Correlated	ERO1LB	ERO1-like beta (S. cerevisiae) [Source:HGNC Symbol;Acc:14355]	1	q42.3	-1	236378855	236445319	ENSG00000086619	-	1062	11	1018	8	25	98.79	1.04	17.079	4.67e-40	0.406509
Correlated	ERP27	endoplasmic reticulum protein 27 [Source:HGNC Symbol;Acc:26495]	12	p12.3	-1	15066969	15092016	ENSG00000139055	-	1026	10	980	11	25	95.44	0.97	13.959	1.71e-29	0.352048
Correlated	ERVH-6	endogenous retrovirus group H, member 6						unknown	-	876	5	844	3	24	81.49	0.57	18.879	5.44e-21	0.317609
Correlated	ERVK13-1	[UniGene: NA]						unknown	+	821	4	793	1	23	76.37	0.49	24.326	5.03e-22	0.336706
Correlated	ESD	esterase D [Source:HGNC Symbol;Acc:3465]	13	q14.2	-1	47345391	47371367	ENSG00000139684	-	1065	8	1021	9	27	99.07	0.75	14.319	1.88e-24	0.31271
Correlated	ESPL1	extra spindle pole bodies homolog 1 (S. cerevisiae) [Source:HGNC Symbol;Acc:16856]	12	q13.13	1	53662083	53687427	ENSG00000135476	+	946	9	903	14	20	88	0.95	12.765	3.06e-24	0.330259
Correlated	ESPN	espin [Source:HGNC Symbol;Acc:13281]	1	p36.31	1	6484848	6521430	ENSG00000187017	+	1036	9	993	7	27	96.37	0.87	16.188	3.4e-31	0.360909
Correlated	ESYT3	extended synaptotagmin-like protein 3 [Source:HGNC Symbol;Acc:24295]	3	q22.3	1	138153428	138200528	ENSG00000158220	-	1024	10	986	3	25	95.26	0.98	22.505	0	0.458756
Correlated	ETFB	electron-transfer-flavoprotein, beta polypeptide [Source:HGNC Symbol;Acc:3482]	19	q13.41	-1	51848423	51869672	ENSG00000105379	+	948	4	918	1	25	88.19	0.42	26.152	1.28e-23	0.325341
Correlated	ETHE1	ethylmalonic encephalopathy 1 [Source:HGNC Symbol;Acc:23287]	19	q13.31	-1	44010871	44031396	ENSG00000105755	+	962	5	931	2	24	89.49	0.52	23.695	2.29e-26	0.342553
Correlated	ETV4	ets variant 4 [Source:HGNC Symbol;Acc:3493]	17	q21.31	-1	41605212	41656988	ENSG00000175832	+	946	9	914	3	20	88	0.95	24.466	0	0.473001
Correlated	ETV5	ets variant 5 [Source:HGNC Symbol;Acc:3494]	3	q27.2	-1	185764097	185828107	ENSG00000244405	-	1065	9	1021	9	26	99.07	0.85	15.214	3.57e-29	0.343561
Correlated	EVA1C	eva-1 homolog C (C. elegans) [UniGene: NA]						unknown	+	1024	7	985	4	28	95.26	0.68	18.618	2.15e-28	0.345373
Correlated	EVC2	Ellis van Creveld syndrome 2 [Source:HGNC Symbol;Acc:19747]	4	p16.2	-1	5544499	5711275	ENSG00000173040	-	1005	7	965	5	28	93.49	0.7	16.75	1.88e-25	0.328885
Correlated	EVI2A	ecotropic viral integration site 2A [Source:HGNC Symbol;Acc:3499]	17	q11.2	-1	29644578	29648902	ENSG00000126860	-	940	12	900	11	17	87.44	1.28	16.912	3.15e-43	0.449605
Correlated	EXO1	exonuclease 1 [Source:HGNC Symbol;Acc:3511]	1	q43	1	242011269	242058450	ENSG00000174371	+	952	7	915	9	21	88.56	0.74	14.875	1.97e-22	0.31579
Correlated	EXOG	endo/exonuclease (5'-3'), endonuclease G-like [Source:HGNC Symbol;Acc:3347]	3	p22.2	1	38537618	38583652	ENSG00000157036	-	950	5	916	2	27	88.37	0.53	21.205	1.27e-23	0.325022
Correlated	EXOSC2	exosome component 2 [Source:HGNC Symbol;Acc:17097]	9	q34.12	1	133569108	133580248	ENSG00000130713	+	966	4	933	1	28	89.86	0.41	24.15	7.51e-22	0.309084
Correlated	EXOSC3	exosome component 3 [Source:HGNC Symbol;Acc:17944]	9	p13.2	-1	37766975	37801434	ENSG00000107371	+	1058	11	1015	7	25	98.42	1.04	17.96	3e-42	0.418763
Correlated	EXOSC6	exosome component 6 [Source:HGNC Symbol;Acc:19055]	16	q22.1	-1	70284134	70285833	ENSG00000223496	+	1040	6	1003	2	29	96.74	0.58	22.286	1.67e-29	0.349739
Correlated	EXT1	exostosin glycosyltransferase 1 [Source:HGNC Symbol;Acc:3512]	LRG_493		1	5001	317457	LRG_493	-	1055	7	1012	6	30	98.14	0.66	15.353	3.16e-23	0.305647
Correlated	EXT2	exostosin glycosyltransferase 2 [Source:HGNC Symbol;Acc:3513]	11	p11.2	1	44117099	44266979	ENSG00000151348	-	975	5	942	2	26	90.7	0.51	22.465	5.22e-25	0.330785
Correlated	EXTL1	exostosin-like glycosyltransferase 1 [Source:HGNC Symbol;Acc:3515]	1	p36.11	1	26346375	26362955	ENSG00000158008	-	953	7	923	1	22	88.65	0.73	28.754	2.52e-44	0.4524
Correlated	EYA1	eyes absent homolog 1 (Drosophila) [Source:HGNC Symbol;Acc:3519]	8	q13.3	-1	72109668	72274467	ENSG00000104313	+	941	7	905	7	22	87.53	0.74	16.224	1.39e-24	0.333625
Correlated	EZH1	enhancer of zeste homolog 1 (Drosophila) [Source:HGNC Symbol;Acc:3526]	17	q21.2	-1	40852293	40897071	ENSG00000108799	-	1073	7	1030	6	30	99.81	0.65	15.615	1.25e-23	0.305879
Correlated	EZH2	enhancer of zeste homolog 2 (Drosophila) [Source:HGNC Symbol;Acc:3527]	7	q36.1	-1	148504475	148581413	ENSG00000106462	+	967	14	920	18	15	89.95	1.45	14.588	5.45e-43	0.442012
Correlated	EZR	ezrin [Source:HGNC Symbol;Acc:12691]	6	q25.3	-1	159186773	159240444	ENSG00000092820	+	953	10	914	9	20	88.65	1.05	16.719	9.85e-36	0.4042
Correlated	F11R	F11 receptor [Source:HGNC Symbol;Acc:14685]	1	q23.3	-1	160965001	160991138	ENSG00000158769	+	992	11	943	13	25	92.28	1.11	12.63	4.46e-29	0.35535
Correlated	F13A1	coagulation factor XIII, A1 polypeptide [Source:HGNC Symbol;Acc:3531]	6	p25.1	-1	6144318	6321246	ENSG00000124491	-	946	10	905	10	21	88	1.06	15.258	1.85e-32	0.385692
Correlated	F2R	coagulation factor II (thrombin) receptor [Source:HGNC Symbol;Acc:3537]	5	q13.3	1	76011868	76031606	ENSG00000181104	+	943	8	902	12	21	87.72	0.85	13.007	4.13e-22	0.314826
Correlated	F2RL2	coagulation factor II (thrombin) receptor-like 2 [Source:HGNC Symbol;Acc:3539]	5	q13.3	-1	75911307	75919259	ENSG00000164220	+	1041	11	991	15	24	96.84	1.06	12.584	6.61e-29	0.345803
Correlated	F2RL3	coagulation factor II (thrombin) receptor-like 3 [Source:HGNC Symbol;Acc:3540]	19	p13.11	1	16999671	17003417	ENSG00000127533	-	922	3	894	0	25	85.77	0.33	32.929	1.09e-22	0.322844
Correlated	F5	coagulation factor V (proaccelerin, labile factor) [Source:HGNC Symbol;Acc:3542]	1	q24.2	-1	169483404	169555826	ENSG00000198734	+	1050	9	1004	11	26	97.67	0.86	13.5	1.06e-25	0.32345
Correlated	F7	coagulation factor VII (serum prothrombin conversion accelerator) [Source:HGNC Symbol;Acc:3544]	13	q34	1	113760105	113774995	ENSG00000057593	+	1041	5	1006	0	30	96.84	0.48	29.743	2.89e-33	0.372452
Correlated	F8	coagulation factor VIII, procoagulant component [Source:HGNC Symbol;Acc:3546]	HG1497_PATCH	q28	-1	154043398	154234550	ENSG00000269261	-	945	6	911	5	23	87.91	0.63	17.774	2.35e-23	0.323906
Correlated	FA2H	fatty acid 2-hydroxylase [Source:HGNC Symbol;Acc:21197]	16	q23.1	-1	74746853	74808729	ENSG00000103089	-	1023	9	977	11	26	95.16	0.88	13.153	5.11e-25	0.322997
Correlated	FABP3	fatty acid binding protein 3, muscle and heart (mammary-derived growth inhibitor) [Source:HGNC Symbol;Acc:3557]	1	p35.2	-1	31838472	31849697	ENSG00000121769	-	934	8	898	4	24	86.88	0.86	19.458	8.11e-34	0.396633
Correlated	FABP4	fatty acid binding protein 4, adipocyte [Source:HGNC Symbol;Acc:3559]	8	q21.13	-1	82390654	82395498	ENSG00000170323	-	1044	8	1001	7	28	97.12	0.77	15.467	1.48e-26	0.330086
Correlated	FABP5	fatty acid binding protein 5 (psoriasis-associated) [Source:HGNC Symbol;Acc:3560]	8	q21.13	1	82192598	82197012	ENSG00000164687	-	940	9	903	8	20	87.44	0.96	17.16	3.68e-33	0.391301
Correlated	FABP6	fatty acid binding protein 6, ileal [Source:HGNC Symbol;Acc:3561]	5	q33.3	1	159614374	159665742	ENSG00000170231	-	931	7	898	4	22	86.6	0.75	20.429	3.13e-31	0.380942
Correlated	FADS3	fatty acid desaturase 3 [Source:HGNC Symbol;Acc:3576]	11	q12.2	-1	61640991	61659523	ENSG00000221968	-	951	10	913	9	19	88.47	1.05	17.26	6.15e-37	0.411728
Correlated	FAHD2CP	fumarylacetoacetate hydrolase domain containing 2C, pseudogene [UniGene: Homo sapiens, clone IMAGE:3849975]						unknown	-	1007	9	963	9	26	93.67	0.89	14.386	1.53e-27	0.342674
Correlated	FAIM	Fas apoptotic inhibitory molecule [Source:HGNC Symbol;Acc:18703]	3	q22.3	1	138327448	138352218	ENSG00000158234	-	958	7	923	6	22	89.12	0.73	17.788	4.89e-27	0.347889
Correlated	FAM101B	family with sequence similarity 101, member B [Source:HGNC Symbol;Acc:28705]	HG990_PATCH	p13.3	-1	289769	295730	ENSG00000261321	-	1056	11	1012	9	24	98.23	1.04	16.594	7.61e-39	0.401164
Correlated	FAM104B	family with sequence similarity 104, member B [Source:HGNC Symbol;Acc:25085]	X	p11.21	-1	55169535	55187743	ENSG00000182518	+	1068	4	1031	0	33	99.35	0.37	28.865	3.8e-26	0.323659
Correlated	FAM107A	family with sequence similarity 107, member A [Source:HGNC Symbol;Acc:30827]	3	p14.2	-1	58549844	58613337	ENSG00000168309	-	956	9	917	8	22	88.93	0.94	16.326	1.76e-31	0.377521
Correlated	FAM111A	family with sequence similarity 111, member A [Source:HGNC Symbol;Acc:24725]	11	q12.1	1	58910221	58922512	ENSG00000166801	+	1059	7	1016	5	31	98.51	0.66	16.257	1.13e-24	0.315104
Correlated	FAM114A1	family with sequence similarity 114, member A1 [Source:HGNC Symbol;Acc:25087]	4	p14	1	38869298	38947360	ENSG00000197712	+	1032	9	986	11	26	96	0.87	13.269	3.02e-25	0.323151
Correlated	FAM115A	family with sequence similarity 115, member A [Source:HGNC Symbol;Acc:22201]	7	q35	-1	143548468	143599291	ENSG00000198420	+	1051	7	1009	5	30	97.77	0.67	16.57	3.69e-25	0.319631
Correlated	FAM118B	family with sequence similarity 118, member B [Source:HGNC Symbol;Acc:26110]	11	q24.2	1	126081309	126132881	ENSG00000197798	+	1067	5	1030	2	30	99.26	0.47	21.776	3.11e-24	0.310915
Correlated	FAM122A	family with sequence similarity 122A [Source:HGNC Symbol;Acc:23490]	9	q21.11	1	71394964	71398609	ENSG00000187866	-	1020	6	980	4	30	94.88	0.59	17	2.35e-22	0.304518
Correlated	FAM122A	family with sequence similarity 122A [Source:HGNC Symbol;Acc:23490]	9	q21.11	1	71394964	71398609	ENSG00000187866	+	1020	5	982	2	31	94.88	0.49	20.238	1.53e-22	0.305886
Correlated	FAM122C	family with sequence similarity 122C [Source:HGNC Symbol;Acc:25202]	X	q26.3	1	133930819	133988640	ENSG00000156500	+	1038	6	998	4	30	96.56	0.58	17.3	9.45e-23	0.304725
Correlated	FAM124A	family with sequence similarity 124A [Source:HGNC Symbol;Acc:26413]	13	q14.3	1	51796503	51858377	ENSG00000150510	-	1034	16	988	11	19	96.19	1.55	17.507	0	0.505922
Correlated	FAM126A	family with sequence similarity 126, member A [Source:HGNC Symbol;Acc:24587]	7	p15.3	-1	22980878	23053749	ENSG00000122591	-	1073	9	1027	8	29	99.81	0.84	14.949	1.14e-28	0.339121
Correlated	FAM126B	family with sequence similarity 126, member B [Source:HGNC Symbol;Acc:28593]	2	q33.1	-1	201843216	201936394	ENSG00000155744	+	1061	9	1013	12	27	98.7	0.85	12.631	6.17e-24	0.30974
Correlated	FAM131A	family with sequence similarity 131, member A [Source:HGNC Symbol;Acc:28308]	3	q27.1	1	184053714	184064063	ENSG00000175182	-	1025	7	988	1	29	95.35	0.68	24.913	2.2e-38	0.404646
Correlated	FAM132A	family with sequence similarity 132, member A [Source:HGNC Symbol;Acc:32308]	1	p36.33	-1	1177826	1182102	ENSG00000184163	-	982	6	943	3	30	91.35	0.61	18.185	5.32e-24	0.322422
Correlated	FAM133B	family with sequence similarity 133, member B [Source:HGNC Symbol;Acc:28629]	7	q21.2	-1	92190107	92219708	ENSG00000234545	+	1041	8	1000	5	28	96.84	0.77	17.795	8.99e-31	0.357454
Correlated	FAM134C	family with sequence similarity 134, member C [Source:HGNC Symbol;Acc:27258]	17	q21.2	-1	40731531	40762641	ENSG00000141699	+	971	6	941	1	23	90.33	0.62	28.7	4.21e-38	0.414149
Correlated	FAM138A	family with sequence similarity 138, member A [Source:HGNC Symbol;Acc:32334]	1	p36.33	-1	34554	36081	ENSG00000237613	+	820	4	790	1	25	76.28	0.49	22.621	1.61e-20	0.324255
Correlated	FAM13C	family with sequence similarity 13, member C [Source:HGNC Symbol;Acc:19371]	10	q21.1	-1	61005890	61122939	ENSG00000148541	-	938	9	896	13	20	87.26	0.96	13.232	3.4e-25	0.338592
Correlated	FAM149A	family with sequence similarity 149, member A [Source:HGNC Symbol;Acc:24527]	4	q35.1	1	187025573	187093821	ENSG00000109794	-	919	7	883	6	23	85.49	0.76	16.495	4.83e-25	0.340961
Correlated	FAM150B	family with sequence similarity 150, member B [Source:HGNC Symbol;Acc:27683]	2	p25.3	-1	279558	288851	ENSG00000189292	-	1008	6	968	4	30	93.77	0.6	16.8	4.3e-22	0.304376
Correlated	FAM151A	family with sequence similarity 151, member A [Source:HGNC Symbol;Acc:25032]	1	p32.3	-1	55074855	55089229	ENSG00000162391	-	919	3	888	0	28	85.49	0.33	29.645	1.61e-20	0.306294
Correlated	FAM151A	family with sequence similarity 151, member A [Source:HGNC Symbol;Acc:25032]	1	p32.3	-1	55074855	55089229	ENSG00000162391	+	919	5	885	3	26	85.49	0.54	18.528	1.36e-20	0.306901
Correlated	FAM162B	family with sequence similarity 162, member B [Source:HGNC Symbol;Acc:21549]	6	q22.1	-1	117073363	117086886	ENSG00000183807	-	995	11	950	9	25	92.56	1.11	15.201	1.78e-35	0.394081
Correlated	FAM163B	family with sequence similarity 163, member B [Source:HGNC Symbol;Acc:33277]	9	q34.2	-1	136444079	136451319	ENSG00000196990	-	1000	7	963	1	29	93.02	0.7	24.306	1.87e-37	0.404447
Correlated	FAM166A	family with sequence similarity 166, member A [Source:HGNC Symbol;Acc:33818]	9	q34.3	-1	140138036	140142222	ENSG00000188163	+	922	6	887	3	26	85.77	0.65	19.208	2.26e-25	0.342796
Correlated	FAM169A	family with sequence similarity 169, member A [Source:HGNC Symbol;Acc:29138]	5	q13.3	-1	74073399	74162776	ENSG00000198780	-	1035	11	978	20	26	96.28	1.06	9.9259	2.59e-22	0.301996
Correlated	FAM171A1	family with sequence similarity 171, member A1 [Source:HGNC Symbol;Acc:23522]	10	p13	-1	15253642	15413061	ENSG00000148468	+	965	5	933	3	24	89.77	0.52	20.797	4.27e-23	0.318609
Correlated	FAM171B	family with sequence similarity 171, member B [Source:HGNC Symbol;Acc:29412]	2	q32.1	1	187558698	187630685	ENSG00000144369	-	1034	9	985	11	29	96.19	0.87	12.245	3.44e-23	0.308466
Correlated	FAM184A	family with sequence similarity 184, member A [Source:HGNC Symbol;Acc:20991]	6	q22.31	-1	119280928	119470552	ENSG00000111879	-	929	7	891	7	24	86.42	0.75	14.984	1.18e-22	0.321383
Correlated	FAM189A1	family with sequence similarity 189, member A1 [Source:HGNC Symbol;Acc:29075]	15	q13.1	-1	29412457	29862927	ENSG00000104059	-	901	6	871	2	22	83.81	0.67	24.134	5.53e-32	0.392139
Correlated	FAM19A1	family with sequence similarity 19 (chemokine (C-C motif)-like), member A1 [Source:HGNC Symbol;Acc:21587]	3	p14.1	1	68053359	68594776	ENSG00000183662	-	993	6	955	4	28	92.37	0.6	17.524	4.67e-23	0.313802
Correlated	FAM19A2	family with sequence similarity 19 (chemokine (C-C motif)-like), member A2 [Source:HGNC Symbol;Acc:21589]	12	q14.1	-1	62102040	62672931	ENSG00000198673	-	1002	8	964	2	28	93.21	0.8	22.267	6.53e-39	0.412198
Correlated	FAM19A5	family with sequence similarity 19 (chemokine (C-C motif)-like), member A5 [Source:HGNC Symbol;Acc:21592]	22	q13.32	1	48885272	49246724	ENSG00000219438	-	1050	8	1008	6	28	97.67	0.76	16.667	1.01e-28	0.343157
Correlated	FAM200A	family with sequence similarity 200, member A [Source:HGNC Symbol;Acc:25401]	7	q22.1	-1	99143931	99156159	ENSG00000221909	+	1057	9	1013	9	26	98.33	0.85	15.1	5.99e-29	0.343444
Correlated	FAM201A	family with sequence similarity 201, member A [Source:HGNC Symbol;Acc:27239]	9	p13.1	1	38620471	38624987	ENSG00000204860	-	862	6	830	3	23	80.19	0.7	19.816	3.39e-26	0.360622
Correlated	FAM203A	family with sequence similarity 203, member A [Source:HGNC Symbol;Acc:24161]	8	q24.3	1	145192672	145195746	ENSG00000235173	+	967	4	934	1	28	89.95	0.41	24.175	7.14e-22	0.309091
Correlated	FAM208A	family with sequence similarity 208, member A [UniGene: NA]						unknown	+	1035	6	994	4	31	96.28	0.58	16.784	4.58e-22	0.300182
Correlated	FAM20C	family with sequence similarity 20, member C [Source:HGNC Symbol;Acc:22140]	7	p22.3	1	192969	300711	ENSG00000177706	-	1043	11	994	13	25	97.02	1.05	13.279	1.22e-30	0.3563
Correlated	FAM211A	family with sequence similarity 211, member A [UniGene: NA]						unknown	-	965	8	924	6	27	89.77	0.83	15.755	3.89e-27	0.347303
Correlated	FAM222B	family with sequence similarity 222, member B [UniGene: NA]						unknown	-	1069	8	1027	5	29	99.44	0.75	17.78	9.78e-31	0.352519
Correlated	FAM228A	family with sequence similarity 228, member A [UniGene: NA]						unknown	-	964	5	927	1	31	89.67	0.52	22.315	6e-25	0.33224
Correlated	FAM45A	family with sequence similarity 45, member A [Source:HGNC Symbol;Acc:31793]	10	q26.11	1	120863598	120897496	ENSG00000119979	+	1000	7	960	5	28	93.02	0.7	16.667	2.53e-25	0.328821
Correlated	FAM49A	family with sequence similarity 49, member A [Source:HGNC Symbol;Acc:25373]	2	p24.2	-1	16730727	16847599	ENSG00000197872	-	1050	10	1002	10	28	97.67	0.95	13.816	3.5e-29	0.346054
Correlated	FAM49B	family with sequence similarity 49, member B [Source:HGNC Symbol;Acc:25216]	8	q24.21	-1	130851839	131029375	ENSG00000153310	-	1073	10	1026	10	27	99.81	0.93	14.5	1.08e-30	0.351605
Correlated	FAM50B	family with sequence similarity 50, member B [Source:HGNC Symbol;Acc:18789]	6	p25.2	1	3849620	3851551	ENSG00000145945	-	961	6	925	5	25	89.4	0.62	16.909	3.36e-22	0.31255
Correlated	FAM60A	family with sequence similarity 60, member A [Source:HGNC Symbol;Acc:30702]	12	p11.21	-1	31433518	31479992	ENSG00000139146	+	1063	14	1012	16	21	98.88	1.32	14.173	1.45e-41	0.414232
Correlated	FAM64A	family with sequence similarity 64, member A [Source:HGNC Symbol;Acc:25483]	17	p13.2	1	6347735	6354789	ENSG00000129195	+	962	9	922	10	21	89.49	0.94	15.189	3.73e-29	0.36136
Correlated	FAM65B	family with sequence similarity 65, member B [Source:HGNC Symbol;Acc:13872]	6	p22.3	-1	24797601	25042238	ENSG00000111913	-	966	13	926	10	17	89.86	1.35	18.2	0	0.480905
Correlated	FAM69B	family with sequence similarity 69, member B [Source:HGNC Symbol;Acc:28290]	9	q34.3	1	139607022	139618502	ENSG00000165716	-	1004	11	960	9	24	93.4	1.1	15.777	7.01e-37	0.400387
Correlated	FAM71E1	family with sequence similarity 71, member E1 [Source:HGNC Symbol;Acc:25107]	19	q13.33	-1	50970042	50980010	ENSG00000142530	-	984	9	941	6	28	91.53	0.91	15.957	8.45e-31	0.36783
Correlated	FAM72C	family with sequence similarity 72, member C [Source:HGNC Symbol;Acc:30602]	1	q21.2	-1	149438750	149459549	ENSG00000203817	+	921	13	873	15	20	85.67	1.41	12.958	3.05e-35	0.408183
Correlated	FAM73A	family with sequence similarity 73, member A [Source:HGNC Symbol;Acc:24741]	1	p31.1	1	78245309	78344106	ENSG00000180488	-	1042	8	996	9	29	96.93	0.77	13.253	1.46e-22	0.302772
Correlated	FAM83B	family with sequence similarity 83, member B [Source:HGNC Symbol;Acc:21357]	6	p12.1	1	54711569	54806820	ENSG00000168143	+	1027	9	987	5	26	95.53	0.88	18.863	1.25e-36	0.394456
Correlated	FAM83D	family with sequence similarity 83, member D [Source:HGNC Symbol;Acc:16122]	20	q11.23	1	37554955	37581703	ENSG00000101447	+	1035	13	987	12	23	96.28	1.26	14.95	5.76e-41	0.416631
Correlated	FAM83H	family with sequence similarity 83, member H [Source:HGNC Symbol;Acc:24797]	HG104_HG975_PATCH	q24.3	-1	144806103	144815971	ENSG00000261380	+	1038	6	997	3	32	96.56	0.58	18.211	5.05e-24	0.313761
Correlated	FAM84B	family with sequence similarity 84, member B [Source:HGNC Symbol;Acc:24166]	8	q24.21	-1	127564687	127570638	ENSG00000168672	+	1032	10	986	8	28	96	0.97	15.088	4.42e-32	0.366992
Correlated	FAM87A	family with sequence similarity 87, member B///family with sequence similarity 87, member A						unknown	-	828	5	800	1	22	77.02	0.6	25.556	1.51e-28	0.385172
Correlated	FANCD2	Fanconi anemia, complementation group D2 [Source:HGNC Symbol;Acc:3585]	3	p25.3	1	10068098	10143614	ENSG00000144554	+	1043	10	997	10	26	97.02	0.96	14.486	1.12e-30	0.356534
Correlated	FANCE	Fanconi anemia, complementation group E [Source:HGNC Symbol;Acc:3586]	LRG_498		1	5001	19744	LRG_498	+	944	7	912	3	22	87.81	0.74	22.786	6.2e-35	0.401325
Correlated	FANCI	Fanconi anemia, complementation group I [Source:HGNC Symbol;Acc:25568]	LRG_500		1	5001	78169	LRG_500	+	1060	10	1007	15	28	98.6	0.94	11.158	3.72e-23	0.304418
Correlated	FAR2	fatty acyl CoA reductase 2 [Source:HGNC Symbol;Acc:25531]	12	p11.22	1	29302036	29493913	ENSG00000064763	+	1067	7	1025	5	30	99.26	0.66	16.822	1.51e-25	0.319823
Correlated	FARP1	FERM, RhoGEF (ARHGEF) and pleckstrin domain protein 1 (chondrocyte-derived) [Source:HGNC Symbol;Acc:3591]	13	q32.2	1	98794816	99102027	ENSG00000152767	-	1071	10	1021	12	28	99.63	0.93	12.811	6.89e-27	0.328059
Correlated	FBLN2	fibulin 2 [Source:HGNC Symbol;Acc:3601]	3	p25.1	1	13573824	13679922	ENSG00000163520	-	956	10	920	6	20	88.93	1.05	19.917	6.28e-43	0.444218
Correlated	FBLN5	fibulin 5 [Source:HGNC Symbol;Acc:3602]	LRG_364		1	5001	83292	LRG_364	-	959	11	921	9	18	89.21	1.15	18.188	7.99e-43	0.442959
Correlated	FBN2	fibrillin 2 [Source:HGNC Symbol;Acc:3604]	5	q23.3	-1	127593601	127994878	ENSG00000138829	+	936	10	896	9	21	87.07	1.07	15.891	6.7e-34	0.396719
Correlated	FBP2	fructose-1,6-bisphosphatase 2 [Source:HGNC Symbol;Acc:3607]	9	q22.32	-1	97321002	97356075	ENSG00000130957	-	918	3	890	0	25	85.4	0.33	32.786	1.36e-22	0.322824
Correlated	FBXL16	F-box and leucine-rich repeat protein 16 [Source:HGNC Symbol;Acc:14150]	16	p13.3	-1	742500	755829	ENSG00000127585	-	1006	12	959	12	23	93.58	1.19	14.371	2.46e-36	0.396873
Correlated	FBXL17	F-box and leucine-rich repeat protein 17 [Source:HGNC Symbol;Acc:13615]	5	q21.3	-1	107194736	107717799	ENSG00000145743	-	1016	7	974	7	28	94.51	0.69	14.514	6.73e-22	0.301733
Correlated	FBXL2	F-box and leucine-rich repeat protein 2 [Source:HGNC Symbol;Acc:13598]	3	p22.3	1	33318517	33445154	ENSG00000153558	-	952	7	918	5	22	88.56	0.74	19.149	3.43e-29	0.363486
Correlated	FBXL3	F-box and leucine-rich repeat protein 3 [Source:HGNC Symbol;Acc:13599]	13	q22.3	-1	77566740	77601330	ENSG00000005812	+	1072	8	1031	3	30	99.72	0.75	20.517	1.05e-35	0.380958
Correlated	FBXL5	F-box and leucine-rich repeat protein 5 [Source:HGNC Symbol;Acc:13602]	4	p15.32	-1	15606162	15683302	ENSG00000118564	-	971	8	931	10	22	90.33	0.82	14.385	1.38e-24	0.328458
Correlated	FBXO11	F-box protein 11 [Source:HGNC Symbol;Acc:13590]	2	p16.3	-1	48016455	48132932	ENSG00000138081	-	1049	7	1007	6	29	97.58	0.67	15.69	9.43e-24	0.310217
Correlated	FBXO21	F-box protein 21 [Source:HGNC Symbol;Acc:13592]	12	q24.22	-1	117581146	117628336	ENSG00000135108	+	968	5	935	3	25	90.05	0.52	20.167	2.13e-22	0.312907
Correlated	FBXO28	F-box protein 28 [Source:HGNC Symbol;Acc:29046]	1	q42.11	1	224301789	224349749	ENSG00000143756	+	976	6	942	3	25	90.79	0.61	20.989	1.01e-27	0.349277
Correlated	FBXO3	F-box protein 3 [Source:HGNC Symbol;Acc:13582]	11	p13	-1	33762485	33796089	ENSG00000110429	+	1073	6	1034	2	31	99.81	0.56	21.75	8.67e-29	0.339867
Correlated	FBXO32	F-box protein 32 [Source:HGNC Symbol;Acc:16731]	8	q24.13	-1	124510129	124553446	ENSG00000156804	+	1070	15	1005	27	23	99.53	1.4	10.056	1.48e-30	0.351265
Correlated	FBXO34	F-box protein 34 [Source:HGNC Symbol;Acc:20201]	14	q22.3	1	55738021	55828636	ENSG00000178974	-	976	4	944	1	27	90.79	0.41	25.187	9.16e-23	0.314358
Correlated	FBXO4	F-box protein 4 [Source:HGNC Symbol;Acc:13583]	5	p13.1	1	41925356	41941845	ENSG00000151876	+	1056	8	1016	5	27	98.23	0.76	18.567	3.9e-32	0.363119
Correlated	FBXO41	F-box protein 41 [Source:HGNC Symbol;Acc:29409]	2	p13.1	-1	73481810	73511559	ENSG00000163013	-	1001	10	962	4	25	93.12	1	20.429	3.92e-44	0.440445
Correlated	FBXO5	F-box protein 5 [Source:HGNC Symbol;Acc:13584]	6	q25.2	-1	153291664	153304714	ENSG00000112029	+	1065	12	1018	12	23	99.07	1.13	15.214	1.52e-38	0.397851
Correlated	FBXO7	F-box protein 7 [Source:HGNC Symbol;Acc:13586]	22	q12.3	1	32870663	32894818	ENSG00000100225	+	1049	5	1012	2	30	97.58	0.48	21.408	7.87e-24	0.310766
Correlated	FBXO9	F-box protein 9 [Source:HGNC Symbol;Acc:13588]	6	p12.1	1	52916789	52965671	ENSG00000112146	-	1050	12	996	16	26	97.67	1.14	11.842	1.88e-29	0.347751
Correlated	FCER1A	Fc fragment of IgE, high affinity I, receptor for; alpha polypeptide [Source:HGNC Symbol;Acc:3609]	1	q23.2	1	159259504	159278014	ENSG00000179639	-	910	8	869	10	23	84.65	0.88	13.047	3.18e-22	0.321369
Correlated	FCER1G	Fc fragment of IgE, high affinity I, receptor for; gamma polypeptide [Source:HGNC Symbol;Acc:3611]	1	q23.3	1	161185024	161190489	ENSG00000158869	-	914	7	880	5	22	85.02	0.77	18.385	5.1e-28	0.362987
Correlated	FCGBP	Fc fragment of IgG binding protein [Source:HGNC Symbol;Acc:13572]	19	q13.2	-1	40353963	40440533	ENSG00000090920	+	955	10	915	9	21	88.84	1.05	16.214	1.32e-34	0.397031
Correlated	FCHO1	FCH domain only 1 [Source:HGNC Symbol;Acc:29002]	19	p13.11	1	17858527	17899377	ENSG00000130475	-	956	9	923	5	19	88.93	0.94	21.949	8.11e-43	0.443615
Correlated	FCHO2	FCH domain only 2 [Source:HGNC Symbol;Acc:25180]	5	q13.2	1	72251808	72386349	ENSG00000157107	+	1035	10	992	8	25	96.28	0.97	16.429	4.64e-35	0.384004
Correlated	FDFT1	farnesyl-diphosphate farnesyltransferase 1 [Source:HGNC Symbol;Acc:3629]	8	p23.1	1	11653082	11696818	ENSG00000079459	-	1053	11	997	18	27	97.95	1.04	10.511	9.24e-24	0.309691
Correlated	FERMT1	fermitin family member 1 [Source:HGNC Symbol;Acc:15889]	20	p12.3	-1	6055492	6104191	ENSG00000101311	+	1062	10	1023	3	26	98.79	0.94	22.692	0	0.452342
Correlated	FERMT3	fermitin family member 3 [Source:HGNC Symbol;Acc:23151]	LRG_180		1	5001	22212	LRG_180	-	1032	5	997	1	29	96	0.48	25.294	3.21e-28	0.342908
Correlated	FEZ1	fasciculation and elongation protein zeta 1 (zygin I) [Source:HGNC Symbol;Acc:3659]	11	q24.2	-1	125315646	125366213	ENSG00000149557	-	970	9	926	15	20	90.23	0.93	12.543	8.96e-24	0.322765
Correlated	FEZ2	fasciculation and elongation protein zeta 2 (zygin II) [Source:HGNC Symbol;Acc:3660]	2	p22.2	-1	36778570	36873230	ENSG00000171055	-	972	7	937	6	22	90.42	0.72	18.048	1.95e-27	0.348075
Correlated	FEZF2	FEZ family zinc finger 2 [Source:HGNC Symbol;Acc:13506]	3	p14.2	-1	62355356	62359999	ENSG00000153266	-	1025	8	987	4	26	95.35	0.78	20.098	6.52e-35	0.385015
Correlated	FGD5	FYVE, RhoGEF and PH domain containing 5 [Source:HGNC Symbol;Acc:19117]	3	p25.1	1	14860469	14975895	ENSG00000154783	-	1047	11	1000	10	26	97.4	1.05	14.822	1.74e-34	0.378494
Correlated	FGD6	FYVE, RhoGEF and PH domain containing 6 [Source:HGNC Symbol;Acc:21740]	12	q22	-1	95470525	95611258	ENSG00000180263	+	1046	10	1000	8	28	97.3	0.96	15.292	1.58e-32	0.367203
Correlated	FGF11	fibroblast growth factor 11 [Source:HGNC Symbol;Acc:3667]	17	p13.1	1	7341592	7349285	ENSG00000161958	+	1041	7	1001	6	27	96.84	0.67	16.486	5.45e-25	0.320001
Correlated	FGF12	fibroblast growth factor 12 [Source:HGNC Symbol;Acc:3668]	3	q29	-1	191859684	192485553	ENSG00000114279	-	1066	9	1024	5	28	99.16	0.84	18.521	6.27e-36	0.383278
Correlated	FGF14	fibroblast growth factor 14 [Source:HGNC Symbol;Acc:3671]	13	q33.1	-1	102372134	103054124	ENSG00000102466	-	1063	8	1020	5	30	98.88	0.75	17.215	9.75e-30	0.347386
Correlated	FGF14-AS2	FGF14 antisense RNA 2 [UniGene: Uncharacterized LOC283481]						unknown	-	1024	7	982	7	28	95.26	0.68	14.629	4.5e-22	0.301849
Correlated	FGF4	fibroblast growth factor 4 [Source:HGNC Symbol;Acc:3682]	11	q13.3	-1	69587797	69590171	ENSG00000075388	+	916	4	886	1	25	85.21	0.44	25.269	7.63e-23	0.325098
Correlated	FGF9	fibroblast growth factor 9 [Source:HGNC Symbol;Acc:3687]	13	q12.11	1	22245522	22278637	ENSG00000102678	-	1031	13	978	15	25	95.91	1.26	12.597	4.46e-34	0.379039
Correlated	FGFBP2	fibroblast growth factor binding protein 2 [Source:HGNC Symbol;Acc:29451]	4	p15.32	-1	15961866	15970932	ENSG00000137441	-	1015	6	978	3	28	94.42	0.59	19.902	2.86e-26	0.332839
Correlated	FGFR1	fibroblast growth factor receptor 1 [Source:HGNC Symbol;Acc:3688]	8	p11.22	-1	38268656	38326352	ENSG00000077782	-	1067	12	1020	11	24	99.26	1.12	15.464	3.13e-39	0.401159
Correlated	FGFR2	fibroblast growth factor receptor 2 [Source:HGNC Symbol;Acc:3689]	10	q26.13	-1	123237848	123357972	ENSG00000066468	-	1021	13	957	28	23	94.98	1.27	8.9925	1.75e-23	0.312534
Correlated	FGFR3	fibroblast growth factor receptor 3 [Source:HGNC Symbol;Acc:3690]	4	p16.3	1	1795034	1810599	ENSG00000068078	+	948	10	909	8	21	88.19	1.05	16.989	2.31e-36	0.408996
Correlated	FGL1	fibrinogen-like 1 [Source:HGNC Symbol;Acc:3695]	8	p22	-1	17721889	17767874	ENSG00000104760	+	949	8	914	3	24	88.28	0.84	21.568	1.3e-37	0.416084
Correlated	FGR	feline Gardner-Rasheed sarcoma viral oncogene homolog [Source:HGNC Symbol;Acc:3697]	1	p36.11	-1	27938575	27961788	ENSG00000000938	-	921	5	889	3	24	85.67	0.54	19.849	4.69e-22	0.31814
Correlated	FHDC1	FH2 domain containing 1 [Source:HGNC Symbol;Acc:29363]	4	q31.3	1	153857504	153900848	ENSG00000137460	+	995	10	953	7	25	92.56	1.01	16.723	9e-36	0.395804
Correlated	FHL5	four and a half LIM domains 5 [Source:HGNC Symbol;Acc:17371]	6	q16.1	1	97010424	97064512	ENSG00000112214	-	927	6	895	3	23	86.23	0.65	21.31	3.69e-28	0.361392
Correlated	FKBP11	FK506 binding protein 11, 19 kDa [Source:HGNC Symbol;Acc:18624]	12	q13.12	-1	49315301	49320257	ENSG00000134285	-	1058	9	1012	11	26	98.42	0.85	13.603	6.62e-26	0.32358
Correlated	FKBP1B	FK506 binding protein 1B, 12.6 kDa [Source:HGNC Symbol;Acc:3712]	2	p23.3	1	24272571	24286551	ENSG00000119782	-	943	9	897	17	20	87.72	0.95	11.256	3.51e-21	0.307613
Correlated	FKBP7	FK506 binding protein 7 [Source:HGNC Symbol;Acc:3723]	2	q31.2	-1	179328391	179343327	ENSG00000079150	+	1015	9	971	8	27	94.42	0.89	14.926	1.19e-28	0.348546
Correlated	FKBPL	FK506 binding protein like [Source:HGNC Symbol;Acc:13949]	HSCHR6_MHC_COX	p21.33	-1	32044940	32046524	ENSG00000230907	+	960	4	930	1	25	89.3	0.42	26.483	6.57e-24	0.325427
Correlated	FKRP	fukutin related protein [Source:HGNC Symbol;Acc:17997]	19	q13.32	1	47249303	47280245	ENSG00000181027	-	1058	7	1017	5	29	98.42	0.66	17.144	4.77e-26	0.324525
Correlated	FLAD1	flavin adenine dinucleotide synthetase 1 [Source:HGNC Symbol;Acc:24671]	1	q21.3	1	154955814	154965587	ENSG00000160688	+	974	5	941	2	26	90.6	0.51	22.442	5.54e-25	0.330776
Correlated	FLI1	Friend leukemia virus integration 1 [Source:HGNC Symbol;Acc:3749]	11	q24.3	1	128555046	128683161	ENSG00000151702	+	1067	7	1024	6	30	99.26	0.66	15.528	1.7e-23	0.305803
Correlated	FLII	flightless I homolog (Drosophila) [Source:HGNC Symbol;Acc:3750]	17	p11.2	-1	18148150	18162230	ENSG00000177731	-	1051	7	1011	2	31	97.77	0.67	21.512	5.13e-33	0.369212
Correlated	FLJ25758	MAP/microtubule affinity-regulating kinase 1 pseudogene [UniGene: NA]						unknown	+	840	3	812	0	25	78.14	0.36	30	9.27e-21	0.322401
Correlated	FLJ30375	uncharacterized LOC440982 [UniGene: Transcribed locus]						unknown	+	921	6	887	2	26	85.67	0.65	21.586	1.32e-28	0.365598
Correlated	FLJ30838	uncharacterized LOC400955 [UniGene: Uncharacterized LOC400955]						unknown	-	848	5	821	0	22	78.88	0.59	31.407	3.95e-35	0.424679
Correlated	FLJ32255	uncharacterized LOC643977 [UniGene: Uncharacterized LOC643977]						unknown	+	973	5	936	2	30	90.51	0.51	19.857	3.96e-22	0.310077
Correlated	FLJ35934	FLJ35934 [UniGene: FLJ35934]						unknown	+	972	9	930	7	26	90.42	0.93	15.621	4.29e-30	0.365582
Correlated	FLJ38379	uncharacterized FLJ38379 [UniGene: Uncharacterized FLJ38379]						unknown	-	857	5	828	2	22	79.72	0.58	22.672	2.93e-25	0.354716
Correlated	FLJ41170	uncharacterized LOC440200 [UniGene: Uncharacterized LOC440200]						unknown	-	926	7	891	2	26	86.14	0.76	21.825	1.55e-33	0.396599
Correlated	FLJ42875	uncharacterized LOC440556 [UniGene: Uncharacterized LOC440556]						unknown	-	974	7	934	5	28	90.6	0.72	16.233	1.17e-24	0.328473
Correlated	FLJ43663	[UniGene: Uncharacterized LOC378805]						unknown	-	958	8	917	3	30	89.12	0.84	18.335	6.87e-32	0.379701
Correlated	FLJ45482	uncharacterized LOC645566						unknown	+	823	5	793	3	22	76.56	0.61	19.051	3.42e-21	0.329375
Correlated	FLNA	filamin A, alpha [Source:HGNC Symbol;Acc:3754]	HG1497_PATCH	q28	-1	153556134	153582248	ENSG00000269329	+	946	6	911	6	23	88	0.63	16.31	2.26e-21	0.308615
Correlated	FLNA	filamin A, alpha [Source:HGNC Symbol;Acc:3754]	HG1497_PATCH	q28	-1	153556134	153582248	ENSG00000269329	-	946	10	903	14	19	88	1.06	13.592	1.1e-28	0.361283
Correlated	FLNC	filamin C, gamma [Source:HGNC Symbol;Acc:3756]	7	q32.1	1	128470431	128499328	ENSG00000128591	-	967	6	932	6	23	89.95	0.62	16.672	7.55e-22	0.308903
Correlated	FLRT2	fibronectin leucine rich transmembrane protein 2 [Source:HGNC Symbol;Acc:3761]	14	q31.3	1	85996488	86095034	ENSG00000185070	-	957	11	909	17	20	89.02	1.15	12.128	7.85e-28	0.353475
Correlated	FLT1	fms-related tyrosine kinase 1 [Source:HGNC Symbol;Acc:3763]	13	q12.3	-1	28874489	29069265	ENSG00000102755	-	1057	12	1008	12	25	98.33	1.14	14.284	4.65e-36	0.385636
Correlated	FLT3	fms-related tyrosine kinase 3 [Source:HGNC Symbol;Acc:3765]	LRG_457		1	4977	102295	LRG_457	-	922	6	891	3	22	85.77	0.65	21.952	5.18e-29	0.368154
Correlated	FLT3LG	fms-related tyrosine kinase 3 ligand [Source:HGNC Symbol;Acc:3766]	19	q13.33	1	49977464	49990894	ENSG00000090554	+	947	5	916	2	24	88.09	0.53	23.325	5.81e-26	0.342418
Correlated	FMN2	formin 2 [Source:HGNC Symbol;Acc:14074]	1	q43	1	240177648	240638489	ENSG00000155816	-	1067	10	1020	10	27	99.26	0.94	14.419	1.62e-30	0.351513
Correlated	FMNL1	formin-like 1 [Source:HGNC Symbol;Acc:1212]	17	q21.31	1	43298811	43324687	ENSG00000184922	-	970	9	937	4	20	90.23	0.93	23.156	2.8e-45	0.453337
Correlated	FN1	fibronectin 1 [Source:HGNC Symbol;Acc:3778]	2	q35	-1	216225163	216300895	ENSG00000115414	-	948	10	899	18	21	88.19	1.05	10.922	1.14e-22	0.318248
Correlated	FNBP1	formin binding protein 1 [Source:HGNC Symbol;Acc:17069]	9	q34.11	-1	132649466	132805473	ENSG00000187239	-	1073	9	1023	12	29	99.81	0.84	12.102	7.22e-23	0.300542
Correlated	FNDC3B	fibronectin type III domain containing 3B [Source:HGNC Symbol;Acc:24670]	3	q26.31	1	171757418	172119455	ENSG00000075420	+	1075	16	1008	29	22	100	1.49	10.058	1.44e-32	0.362448
Correlated	FNDC5	fibronectin type III domain containing 5 [Source:HGNC Symbol;Acc:20240]	1	p35.1	-1	33327869	33338083	ENSG00000160097	-	1020	7	977	5	31	94.88	0.69	15.658	9.4e-24	0.314607
Correlated	FNDC9	fibronectin type III domain containing 9 [Source:HGNC Symbol;Acc:33547]	5	q33.3	-1	156768608	156772729	ENSG00000172568	-	890	8	859	2	21	82.79	0.9	24.552	5.39e-43	0.460764
Correlated	FOLH1B	folate hydrolase 1B [Source:HGNC Symbol;Acc:13636]	11	q14.3	1	89371683	89431886	ENSG00000134612	-	905	5	874	3	23	84.19	0.55	20.201	1.9e-22	0.324003
Correlated	FOLR2	folate receptor 2 (fetal) [Source:HGNC Symbol;Acc:3793]	11	q13.4	1	71927645	71932994	ENSG00000165457	-	1031	7	994	3	27	95.91	0.68	21.226	1.71e-32	0.369657
Correlated	FOPNL	FGFR1OP N-terminal like [Source:HGNC Symbol;Acc:26435]	16	p13.11	-1	15959577	15982482	ENSG00000133393	+	1041	5	1004	2	30	96.84	0.48	21.245	1.19e-23	0.310699
Correlated	FOSB	FBJ murine osteosarcoma viral oncogene homolog B [Source:HGNC Symbol;Acc:3797]	19	q13.32	1	45971253	45978437	ENSG00000125740	-	967	11	923	13	20	89.95	1.14	14.297	3.35e-33	0.386054
Correlated	FOXA2	forkhead box A2 [Source:HGNC Symbol;Acc:5022]	20	p11.21	-1	22561643	22566093	ENSG00000125798	+	919	7	884	7	21	85.49	0.76	16.411	7.01e-25	0.339784
Correlated	FOXD1	forkhead box D1 [Source:HGNC Symbol;Acc:3802]	5	q13.2	-1	72740654	72744352	ENSG00000251493	+	955	10	908	18	19	88.84	1.05	11.761	1.49e-24	0.33097
Correlated	FOXK1	forkhead box K1 [Source:HGNC Symbol;Acc:23480]	7	p22.1	1	4683388	4811074	ENSG00000164916	-	1035	6	995	2	32	96.28	0.58	20.428	4.8e-27	0.334753
Correlated	FOXM1	forkhead box M1 [Source:HGNC Symbol;Acc:3818]	12	p13.33	-1	2966847	2986206	ENSG00000111206	+	970	11	925	15	19	90.23	1.13	13.679	1.16e-31	0.375923
Correlated	FOXO3B	forkhead box O3B pseudogene [Source:HGNC Symbol;Acc:3822]	17	p11.2	-1	18574259	18576186	ENSG00000240445	+	838	6	804	7	21	77.95	0.72	14.325	1e-18	0.305194
Correlated	FOXO3B	forkhead box O3B pseudogene [Source:HGNC Symbol;Acc:3822]	17	p11.2	-1	18574259	18576186	ENSG00000240445	-	838	5	808	3	22	77.95	0.6	19.398	1.42e-21	0.329573
Correlated	FOXP1	forkhead box P1 [Source:HGNC Symbol;Acc:3823]	3	p13	-1	71003844	71633140	ENSG00000114861	-	1071	13	1005	28	25	99.63	1.21	8.9365	2.82e-23	0.303698
Correlated	FPR3	formyl peptide receptor 3 [Source:HGNC Symbol;Acc:3828]	19	q13.41	1	52298416	52329442	ENSG00000187474	+	1044	10	998	9	27	97.12	0.96	14.851	1.62e-31	0.361469
Correlated	FRAS1	Fraser syndrome 1 [Source:HGNC Symbol;Acc:19185]	4	q21.21	1	78978724	79465423	ENSG00000138759	-	1061	11	1005	20	25	98.7	1.04	10.458	1.29e-23	0.3075
Correlated	FREM1	FRAS1 related extracellular matrix 1 [Source:HGNC Symbol;Acc:23399]	9	p22.3	-1	14734664	14910993	ENSG00000164946	-	1034	12	991	6	25	96.19	1.16	18.631	0	0.452075
Correlated	FRK	fyn-related kinase [Source:HGNC Symbol;Acc:3955]	6	q22.1	-1	116252312	116381921	ENSG00000111816	-	918	3	889	0	26	85.4	0.33	31.655	7.57e-22	0.317031
Correlated	FRMD5	FERM domain containing 5 [Source:HGNC Symbol;Acc:28214]	15	q15.3	-1	44162962	44487450	ENSG00000171877	+	1020	6	981	4	29	94.88	0.59	17.486	5.31e-23	0.309217
Correlated	FRMPD2P1	FERM and PDZ domain containing 2 pseudogene 1 [Source:HGNC Symbol;Acc:16843]	HG1211_PATCH	q11.22	1	47366306	47390774	ENSG00000265397	-	916	6	882	1	27	85.21	0.66	23.792	1.24e-31	0.386661
Correlated	FRMPD4	FERM and PDZ domain containing 4 [Source:HGNC Symbol;Acc:29007]	X	p22.2	1	12156585	12742642	ENSG00000169933	-	1015	6	980	1	28	94.42	0.59	25.588	5.53e-34	0.381462
Correlated	FRYL	FRY-like [Source:HGNC Symbol;Acc:29127]	4	p11	-1	48499378	48782339	ENSG00000075539	+	945	9	909	4	23	87.91	0.95	20.445	7.03e-40	0.429937
Correlated	FSCN1	fascin homolog 1, actin-bundling protein (Strongylocentrotus purpuratus) [Source:HGNC Symbol;Acc:11148]	7	p22.1	1	5632439	5646286	ENSG00000075618	-	959	10	913	17	19	89.21	1.04	12.248	1.2e-25	0.338063
Correlated	FSTL1	follistatin-like 1 [Source:HGNC Symbol;Acc:3972]	3	q13.33	-1	120111140	120170100	ENSG00000163430	-	1054	12	1007	12	23	98.05	1.14	15.057	3.91e-38	0.397677
Correlated	FSTL3	follistatin-like 3 (secreted glycoprotein) [Source:HGNC Symbol;Acc:3973]	19	p13.3	1	676392	683385	ENSG00000070404	-	972	7	938	3	24	90.42	0.72	21.948	1.25e-33	0.387658
Correlated	FSTL4	follistatin-like 4 [Source:HGNC Symbol;Acc:21389]	5	q31.1	-1	132532147	132948255	ENSG00000053108	-	948	5	916	3	24	88.19	0.53	20.431	1.08e-22	0.318433
Correlated	FTCD	formimidoyltransferase cyclodeaminase [Source:HGNC Symbol;Acc:3974]	21	q22.3	-1	47556176	47575481	ENSG00000160282	-	1045	8	1007	2	28	97.21	0.77	23.222	1.4e-40	0.412594
Correlated	FTL	ferritin, light polypeptide [Source:HGNC Symbol;Acc:3999]	19	q13.33	1	49468558	49470135	ENSG00000087086	-	931	6	896	6	23	86.6	0.64	16.052	4.96e-21	0.3084
Correlated	FUBP1	far upstream element (FUSE) binding protein 1 [Source:HGNC Symbol;Acc:4004]	1	p31.1	-1	78409740	78444794	ENSG00000162613	+	972	10	926	15	21	90.42	1.03	12.542	2.62e-26	0.340377
Correlated	FUNDC1	FUN14 domain containing 1 [Source:HGNC Symbol;Acc:28746]	X	p11.3	-1	44382885	44402247	ENSG00000069509	+	1018	5	982	1	30	94.7	0.49	24.238	4.64e-27	0.337632
Correlated	FUT1	fucosyltransferase 1 (galactoside 2-alpha-L-fucosyltransferase, H blood group) [Source:HGNC Symbol;Acc:4012]	19	q13.33	-1	49251268	49258647	ENSG00000174951	-	924	6	890	3	25	85.95	0.65	19.871	2.99e-26	0.348706
Correlated	FUT1	fucosyltransferase 1 (galactoside 2-alpha-L-fucosyltransferase, H blood group) [Source:HGNC Symbol;Acc:4012]	19	q13.33	-1	49251268	49258647	ENSG00000174951	+	924	5	890	3	26	85.95	0.54	18.629	1.05e-20	0.306959
Correlated	FUT3	fucosyltransferase 3 (galactoside 3(4)-L-fucosyltransferase, Lewis blood group) [Source:HGNC Symbol;Acc:4014]	19	p13.3	-1	5842899	5851485	ENSG00000171124	+	918	6	884	5	23	85.4	0.65	17.266	1.09e-22	0.323544
Correlated	FXR2	fragile X mental retardation, autosomal homolog 2 [Source:HGNC Symbol;Acc:4024]	LRG_285		1	5001	28668	LRG_285	-	976	5	945	0	26	90.79	0.51	31.484	3.46e-35	0.396196
Correlated	FXYD1	FXYD domain containing ion transport regulator 1 [Source:HGNC Symbol;Acc:4025]	19	q13.12	1	35629712	35634013	ENSG00000266964	-	933	11	891	11	20	86.79	1.18	15.048	4.18e-35	0.404721
Correlated	FXYD5	FXYD domain containing ion transport regulator 5 [Source:HGNC Symbol;Acc:4029]	19	q13.12	1	35645633	35660786	ENSG00000089327	+	1043	7	1001	7	28	97.02	0.67	14.9	1.72e-22	0.302117
Correlated	FXYD6	FXYD domain containing ion transport regulator 6 [Source:HGNC Symbol;Acc:4030]	11	q23.3	-1	117707693	117748201	ENSG00000137726	-	903	6	868	6	23	84	0.66	15.569	2.15e-20	0.307981
Correlated	FXYD7	FXYD domain containing ion transport regulator 7 [Source:HGNC Symbol;Acc:4034]	19	q13.12	1	35634154	35645204	ENSG00000221946	-	916	7	886	1	22	85.21	0.76	27.638	1.28e-42	0.452105
Correlated	FYN	FYN oncogene related to SRC, FGR, YES [Source:HGNC Symbol;Acc:4037]	6	q21	-1	111981535	112194655	ENSG00000010810	+	1071	12	1017	16	26	99.63	1.12	12.079	4.49e-30	0.348158
Correlated	FZD5	frizzled family receptor 5 [Source:HGNC Symbol;Acc:4043]	2	q33.3	-1	208627310	208634287	ENSG00000163251	+	961	12	916	15	18	89.4	1.25	14.237	5.51e-36	0.404003
Correlated	FZR1	fizzy/cell division cycle 20 related 1 (Drosophila) [Source:HGNC Symbol;Acc:24824]	19	p13.3	1	3506271	3538328	ENSG00000105325	-	977	4	944	1	28	90.88	0.41	24.425	4.31e-22	0.309165
Correlated	G2E3	G2/M-phase specific E3 ubiquitin protein ligase [Source:HGNC Symbol;Acc:20338]	14	q12	1	31028329	31089269	ENSG00000092140	+	1068	12	1023	8	25	99.35	1.12	17.319	2.8e-44	0.427068
Correlated	G3BP2	GTPase activating protein (SH3 domain) binding protein 2 [Source:HGNC Symbol;Acc:30291]	4	q21.1	-1	76567966	76649709	ENSG00000138757	+	969	5	936	3	25	90.14	0.52	20.188	2.02e-22	0.312917
Correlated	GAB2	GRB2-associated binding protein 2 [Source:HGNC Symbol;Acc:14458]	11	q14.1	-1	77926343	78129394	ENSG00000033327	-	966	6	934	1	25	89.86	0.62	26.71	1.78e-35	0.399955
Correlated	GABARAPL1	GABA(A) receptor-associated protein like 1 [Source:HGNC Symbol;Acc:4068]	12	p13.2	1	10365057	10375727	ENSG00000139112	-	948	10	911	8	19	88.19	1.05	18.161	5.71e-39	0.424108
Correlated	GABARAPL3	GABA(A) receptors associated protein like 3, pseudogene [Source:HGNC Symbol;Acc:4069]	15	q26.1	-1	90890819	90892669	ENSG00000238244	-	866	8	825	12	21	80.56	0.92	11.945	3.03e-20	0.313238
Correlated	GABBR1	gamma-aminobutyric acid (GABA) B receptor, 1 [Source:HGNC Symbol;Acc:4070]	HSCHR6_MHC_DBB	p22.1	-1	29523343	29600923	ENSG00000237112	-	1061	9	1018	5	29	98.7	0.85	17.949	8.6e-35	0.377742
Correlated	GABPA	GA binding protein transcription factor, alpha subunit 60kDa [Source:HGNC Symbol;Acc:4071]	21	q21.3	1	27106881	27144771	ENSG00000154727	+	1074	6	1034	3	31	99.91	0.56	19.351	1.58e-25	0.318659
Correlated	GABRA1	gamma-aminobutyric acid (GABA) A receptor, alpha 1 [Source:HGNC Symbol;Acc:4075]	5	q34	1	161274197	161326975	ENSG00000022355	-	1030	7	993	3	27	95.81	0.68	21.206	1.84e-32	0.369647
Correlated	GABRA2	gamma-aminobutyric acid (GABA) A receptor, alpha 2 [Source:HGNC Symbol;Acc:4076]	4	p12	-1	46250444	46477247	ENSG00000151834	-	952	6	917	4	25	88.56	0.63	18.426	2.89e-24	0.329396
Correlated	GABRA4	gamma-aminobutyric acid (GABA) A receptor, alpha 4 [Source:HGNC Symbol;Acc:4078]	4	p12	-1	46920917	46996424	ENSG00000109158	-	1013	7	975	3	28	94.23	0.69	20.26	5.26e-31	0.363806
Correlated	GABRA5	gamma-aminobutyric acid (GABA) A receptor, alpha 5 [Source:HGNC Symbol;Acc:4079]	15	q12	1	27111510	27194354	ENSG00000186297	-	925	8	892	4	21	86.05	0.86	21.264	5.09e-37	0.417959
Correlated	GABRB1	gamma-aminobutyric acid (GABA) A receptor, beta 1 [Source:HGNC Symbol;Acc:4081]	4	p12	1	46995740	47428461	ENSG00000163288	-	923	5	892	2	24	85.86	0.54	22.734	2.58e-25	0.342193
Correlated	GABRB2	gamma-aminobutyric acid (GABA) A receptor, beta 2 [Source:HGNC Symbol;Acc:4082]	5	q34	-1	160715436	160976050	ENSG00000145864	-	1026	6	987	4	29	95.44	0.58	17.589	3.89e-23	0.309285
Correlated	GABRB3	gamma-aminobutyric acid (GABA) A receptor, beta 3 [Source:HGNC Symbol;Acc:4083]	15	q12	-1	26788693	27184686	ENSG00000166206	-	1061	14	1008	16	23	98.7	1.32	13.382	4.42e-39	0.401488
Correlated	GABRG1	gamma-aminobutyric acid (GABA) A receptor, gamma 1 [Source:HGNC Symbol;Acc:4086]	4	p12	-1	46037786	46126098	ENSG00000163285	+	1012	7	970	7	28	94.14	0.69	14.457	8.24e-22	0.301674
Correlated	GABRP	gamma-aminobutyric acid (GABA) A receptor, pi [Source:HGNC Symbol;Acc:4089]	5	q35.1	1	170190354	170241051	ENSG00000094755	+	944	6	911	4	23	87.81	0.64	19.531	9.79e-26	0.341362
Correlated	GAD1	glutamate decarboxylase 1 (brain, 67kDa) [Source:HGNC Symbol;Acc:4092]	2	q31.1	1	171669723	171717661	ENSG00000128683	+	961	15	913	16	17	89.4	1.56	14.531	1.4e-45	0.458505
Correlated	GAD1	glutamate decarboxylase 1 (brain, 67kDa) [Source:HGNC Symbol;Acc:4092]	2	q31.1	1	171669723	171717661	ENSG00000128683	-	961	9	924	5	23	89.4	0.94	19.306	1.52e-37	0.41309
Correlated	GAD2	glutamate decarboxylase 2 (pancreatic islets and brain, 65kDa) [Source:HGNC Symbol;Acc:4093]	10	p12.1	1	26505236	26593487	ENSG00000136750	-	1043	11	998	7	27	97.02	1.05	16.773	2.32e-39	0.406451
Correlated	GALC	galactosylceramidase [Source:HGNC Symbol;Acc:4115]	14	q31.3	-1	88304164	88460009	ENSG00000054983	+	960	6	924	5	25	89.3	0.63	16.891	3.54e-22	0.312537
Correlated	GALE	UDP-galactose-4-epimerase [Source:HGNC Symbol;Acc:4116]	1	p36.11	-1	24122089	24127271	ENSG00000117308	+	957	9	917	9	22	89.02	0.94	15.435	1.14e-29	0.365688
Correlated	GALNT1	UDP-N-acetyl-alpha-D-galactosamine:polypeptide N-acetylgalactosaminyltransferase 1 (GalNAc-T1) [Source:HGNC Symbol;Acc:4123]	18	q12.2	1	33161081	33291798	ENSG00000141429	+	1074	10	1032	5	27	99.91	0.93	19.351	1.19e-41	0.412551
Correlated	GALNT10	UDP-N-acetyl-alpha-D-galactosamine:polypeptide N-acetylgalactosaminyltransferase 10 (GalNAc-T10) [Source:HGNC Symbol;Acc:19873]	5	q33.2	1	153570290	153800544	ENSG00000164574	+	1060	14	1013	10	23	98.6	1.32	16.712	0	0.454791
Correlated	GALNT14	UDP-N-acetyl-alpha-D-galactosamine:polypeptide N-acetylgalactosaminyltransferase 14 (GalNAc-T14) [Source:HGNC Symbol;Acc:22946]	2	p23.1	-1	31133333	31378068	ENSG00000158089	-	913	9	870	14	20	84.93	0.99	12.319	2.31e-23	0.329582
Correlated	GALNT15	UDP-N-acetyl-alpha-D-galactosamine:polypeptide N-acetylgalactosaminyltransferase 15 [UniGene: UDP-N-acetyl-alpha-D-galactosamine:polypeptide N-acetylgalactosaminyltransfe...]						unknown	-	1009	8	964	7	30	93.86	0.79	14.161	3e-24	0.319843
Correlated	GALNTL5	UDP-N-acetyl-alpha-D-galactosamine:polypeptide N-acetylgalactosaminyltransferase-like 5 [Source:HGNC Symbol;Acc:21725]	7	q36.1	1	151653464	151717019	ENSG00000106648	-	968	5	932	2	29	90.05	0.52	20.336	1.17e-22	0.314864
Correlated	GALR1	galanin receptor 1 [Source:HGNC Symbol;Acc:4132]	18	q23	1	74962505	74980858	ENSG00000166573	+	908	5	879	0	24	84.47	0.55	31.31	5.2e-35	0.409672
Correlated	GAMT	guanidinoacetate N-methyltransferase [Source:HGNC Symbol;Acc:4136]	19	p13.3	-1	1397091	1401569	ENSG00000130005	-	953	11	914	10	18	88.65	1.15	17.213	2.02e-40	0.431162
Correlated	GARNL3	GTPase activating Rap/RanGAP domain-like 3 [Source:HGNC Symbol;Acc:25425]	9	q33.3	1	129986544	130155939	ENSG00000136895	+	1025	7	984	6	28	95.35	0.68	15.769	7.01e-24	0.314743
Correlated	GART	phosphoribosylglycinamide formyltransferase, phosphoribosylglycinamide synthetase, phosphoribosylaminoimidazole synthetase [Source:HGNC Symbol;Acc:4163]	HSCHR21_4_CTG1_1	q22.11	-1	34880498	34925355	ENSG00000262473	+	1055	10	1007	10	28	98.14	0.95	13.882	2.52e-29	0.346135
Correlated	GAS2L3	growth arrest-specific 2 like 3 [Source:HGNC Symbol;Acc:27475]	12	q23.1	1	100967461	101022064	ENSG00000139354	+	1042	14	993	12	23	96.93	1.34	15.164	9.81e-45	0.434761
Correlated	GAS5	growth arrest-specific 5 (non-protein coding) [Source:HGNC Symbol;Acc:16355]	1	q25.1	-1	173833038	173838020	ENSG00000234741	+	1015	9	968	10	28	94.42	0.89	12.994	1.01e-24	0.322221
Correlated	GAS7	growth arrest-specific 7 [Source:HGNC Symbol;Acc:4169]	17	p13.1	-1	9813926	10101868	ENSG00000007237	-	972	17	924	17	14	90.42	1.75	15.677	0	0.507194
Correlated	GATA2	GATA binding protein 2 [Source:HGNC Symbol;Acc:4171]	3	q21.3	-1	128198270	128212028	ENSG00000179348	-	970	11	927	14	18	90.23	1.13	14.717	3.16e-34	0.391674
Correlated	GATA3	GATA binding protein 3 [Source:HGNC Symbol;Acc:4172]	10	p14	1	8095567	8117161	ENSG00000107485	+	919	12	881	9	17	85.49	1.31	18.108	0	0.472263
Correlated	GATM	glycine amidinotransferase (L-arginine:glycine amidinotransferase) [Source:HGNC Symbol;Acc:4175]	15	q21.1	-1	45653322	45694525	ENSG00000171766	-	1051	13	990	25	23	97.77	1.24	9.9876	2.21e-26	0.327829
Correlated	GBX2	gastrulation brain homeobox 2 [Source:HGNC Symbol;Acc:4186]	2	q37.2	-1	237073879	237077012	ENSG00000168505	+	934	7	906	0	21	86.88	0.75	33.357	0	0.494304
Correlated	GCGR	glucagon receptor [Source:HGNC Symbol;Acc:4192]	17	q25.3	1	79762008	79771889	ENSG00000215644	+	913	6	884	1	22	84.93	0.66	27.949	3.97e-37	0.421342
Correlated	GCK	glucokinase (hexokinase 4) [Source:HGNC Symbol;Acc:4195]	7	p13	-1	44183872	44237769	ENSG00000106633	-	940	4	910	1	25	87.44	0.43	25.931	2e-23	0.325281
Correlated	GDA	guanine deaminase [Source:HGNC Symbol;Acc:4212]	9	q21.13	1	74729511	74872109	ENSG00000119125	-	1057	12	1012	10	23	98.33	1.14	16.473	5.84e-42	0.417462
Correlated	GDAP1	ganglioside induced differentiation associated protein 1 [Source:HGNC Symbol;Acc:15968]	8	q21.11	1	75233365	75401107	ENSG00000104381	-	1053	12	1009	9	23	97.95	1.14	17.192	6.59e-44	0.428278
Correlated	GDF10	growth differentiation factor 10 [Source:HGNC Symbol;Acc:4215]	HG1211_PATCH	q11.22	1	47795834	47808995	ENSG00000266524	-	950	7	920	1	22	88.37	0.74	28.664	3.5e-44	0.452377
Correlated	GDPD1	glycerophosphodiester phosphodiesterase domain containing 1 [Source:HGNC Symbol;Acc:20883]	17	q22	1	57297828	57353328	ENSG00000153982	+	1019	10	973	11	25	94.79	0.98	13.864	2.77e-29	0.351929
Correlated	GEMIN4	gem (nuclear organelle) associated protein 4 [Source:HGNC Symbol;Acc:15717]	17	p13.3	-1	647654	657239	ENSG00000179409	+	971	8	940	2	21	90.33	0.82	26.786	0	0.461529
Correlated	GEN1	GEN1 Holliday junction 5' flap endonuclease [Source:HGNC Symbol;Acc:26881]	2	p24.2	1	17935125	17966632	ENSG00000178295	+	1042	8	1001	3	30	96.93	0.77	19.943	1.06e-34	0.380655
Correlated	GFAP	glial fibrillary acidic protein [Source:HGNC Symbol;Acc:4235]	17	q21.31	-1	42982376	42994305	ENSG00000131095	+	1006	8	964	6	28	93.58	0.8	15.968	1.69e-27	0.342566
Correlated	GFOD1	glucose-fructose oxidoreductase domain containing 1 [Source:HGNC Symbol;Acc:21096]	6	p23	-1	13358062	13487894	ENSG00000145990	-	958	7	920	9	22	89.12	0.73	14.453	9.01e-22	0.309764
Correlated	GGA2	golgi-associated, gamma adaptin ear containing, ARF binding protein 2 [Source:HGNC Symbol;Acc:16064]	16	p12.2	-1	23474863	23533316	ENSG00000103365	+	953	7	919	5	22	88.65	0.73	19.17	3.2e-29	0.363499
Correlated	GGA3	golgi-associated, gamma adaptin ear containing, ARF binding protein 3 [Source:HGNC Symbol;Acc:17079]	17	q25.1	-1	73232694	73258444	ENSG00000125447	-	970	5	938	3	24	90.23	0.52	20.905	3.25e-23	0.31866
Correlated	GGACT	gamma-glutamylamine cyclotransferase [UniGene: NA]						unknown	-	1032	7	992	5	28	96	0.68	17.2	3.84e-26	0.329224
Correlated	GGPS1	geranylgeranyl diphosphate synthase 1 [Source:HGNC Symbol;Acc:4249]	1	q42.3	1	235490665	235507847	ENSG00000152904	+	858	5	826	4	23	79.81	0.58	17.024	6.93e-19	0.303021
Correlated	GGT5	gamma-glutamyltransferase 5 [Source:HGNC Symbol;Acc:4260]	22	q11.23	-1	24615622	24641110	ENSG00000099998	-	928	5	895	3	25	86.33	0.54	19.333	1.75e-21	0.312475
Correlated	GGT7	gamma-glutamyltransferase 7 [Source:HGNC Symbol;Acc:4259]	20	q11.22	-1	33432523	33460663	ENSG00000131067	-	1020	8	977	8	27	94.88	0.78	14.571	6.08e-25	0.322949
Correlated	GGTLC2	gamma-glutamyltransferase light chain 2 [Source:HGNC Symbol;Acc:18596]	22	q11.22	1	22988780	22990368	ENSG00000100121	-	864	5	835	1	23	80.37	0.58	25.714	1.03e-28	0.37823
Correlated	GIGYF2	GRB10 interacting GYF protein 2 [Source:HGNC Symbol;Acc:11960]	2	q37.1	1	233562009	233725285	ENSG00000204120	+	1073	9	1024	12	28	99.81	0.84	12.429	1.59e-23	0.305151
Correlated	GIMAP1	GTPase, IMAP family member 1 [Source:HGNC Symbol;Acc:23237]	7	q36.1	1	150413645	150421372	ENSG00000213203	+	1018	7	977	6	28	94.7	0.69	15.662	1.02e-23	0.314648
Correlated	GIMAP6	GTPase, IMAP family member 6 [Source:HGNC Symbol;Acc:21918]	7	q36.1	-1	150322463	150329473	ENSG00000133561	-	1048	10	997	15	26	97.49	0.95	11.644	2.99e-24	0.313846
Correlated	GIMAP8	GTPase, IMAP family member 8 [Source:HGNC Symbol;Acc:21792]	7	q36.1	1	150147718	150176480	ENSG00000171115	-	1024	9	978	11	26	95.26	0.88	13.166	4.82e-25	0.323014
Correlated	GINS1	GINS complex subunit 1 (Psf1 homolog) [Source:HGNC Symbol;Acc:28980]	20	p11.21	1	25388363	25433264	ENSG00000101003	+	929	9	885	13	22	86.42	0.97	12.26	3.06e-23	0.325815
Correlated	GINS2	GINS complex subunit 2 (Psf2 homolog) [Source:HGNC Symbol;Acc:24575]	16	q24.1	-1	85709804	85723679	ENSG00000131153	+	1069	11	1020	13	25	99.44	1.03	13.61	1.94e-31	0.356748
Correlated	GINS3	GINS complex subunit 3 (Psf3 homolog) [Source:HGNC Symbol;Acc:25851]	16	q21	1	58328984	58440048	ENSG00000181938	+	967	6	932	6	23	89.95	0.62	16.672	7.55e-22	0.308903
Correlated	GIT1	G protein-coupled receptor kinase interacting ArfGAP 1 [Source:HGNC Symbol;Acc:4272]	17	q11.2	-1	27900487	27921072	ENSG00000108262	-	947	5	913	3	26	88.09	0.53	19.093	3.26e-21	0.30722
Correlated	GJC1	gap junction protein, gamma 1, 45kDa [Source:HGNC Symbol;Acc:4280]	17	q21.31	-1	42875816	42908184	ENSG00000182963	-	1067	9	1018	13	27	99.26	0.84	12.125	6.67e-23	0.30163
Correlated	GJC2	gap junction protein, gamma 2, 47kDa [Source:HGNC Symbol;Acc:17494]	1	q42.13	1	228337553	228347527	ENSG00000198835	-	928	6	895	5	22	86.33	0.65	18.078	9.16e-24	0.329917
Correlated	GLB1L3	galactosidase, beta 1-like 3 [Source:HGNC Symbol;Acc:25147]	11	q25	1	134144139	134189458	ENSG00000166105	-	876	7	839	8	22	81.49	0.8	14.097	2.88e-21	0.319859
Correlated	GLCCI1	glucocorticoid induced transcript 1 [Source:HGNC Symbol;Acc:18713]	7	p21.3	1	8008425	8133902	ENSG00000106415	+	1021	13	976	10	22	94.98	1.27	16.488	1.4e-45	0.442991
Correlated	GLCE	glucuronic acid epimerase [Source:HGNC Symbol;Acc:17855]	15	q23	1	69452923	69564556	ENSG00000138604	+	970	7	932	9	22	90.23	0.72	14.634	4.75e-22	0.309957
Correlated	GLI2	GLI family zinc finger 2 [Source:HGNC Symbol;Acc:4318]	2	q14.2	1	121493199	121750229	ENSG00000074047	-	1037	8	998	4	27	96.47	0.77	19.752	2.69e-34	0.379215
Correlated	GLIPR1	GLI pathogenesis-related 1 [Source:HGNC Symbol;Acc:17001]	12	q21.2	1	75874460	75897633	ENSG00000139278	-	1074	14	1023	14	23	99.91	1.3	14.514	1.22e-42	0.417631
Correlated	GLOD5	glyoxalase domain containing 5 [Source:HGNC Symbol;Acc:33358]	HG1436_HG1432_PATCH	p11.23	1	48621149	48633047	ENSG00000268712	-	930	7	897	1	25	86.51	0.75	25.43	3.29e-39	0.42957
Correlated	GLRA2	glycine receptor, alpha 2 [Source:HGNC Symbol;Acc:4327]	X	p22.2	1	14547420	14749934	ENSG00000101958	-	928	4	897	0	27	86.33	0.43	29.935	4.2e-27	0.353923
Correlated	GLRB	glycine receptor, beta [Source:HGNC Symbol;Acc:4329]	4	q32.1	1	157997209	158093242	ENSG00000109738	-	1053	9	1013	5	26	97.95	0.85	19.341	1.44e-37	0.394762
Correlated	GLS	glutaminase [Source:HGNC Symbol;Acc:4331]	2	q32.2	1	191745553	191830278	ENSG00000115419	-	1074	13	1019	18	24	99.91	1.21	12.173	8.92e-33	0.363836
Correlated	GLS2	glutaminase 2 (liver, mitochondrial) [Source:HGNC Symbol;Acc:29570]	12	q13.3	-1	56864736	56882198	ENSG00000135423	-	953	14	911	11	17	88.65	1.47	17.215	0	0.488024
Correlated	GLT1D1	glycosyltransferase 1 domain containing 1 [Source:HGNC Symbol;Acc:26483]	12	q24.33	1	129337972	129469509	ENSG00000151948	-	1007	11	964	8	24	93.67	1.09	16.657	4.6e-39	0.412014
Correlated	GLTSCR2	glioma tumor suppressor candidate region gene 2 [Source:HGNC Symbol;Acc:4333]	19	q13.33	1	48248779	48260315	ENSG00000105373	+	1050	6	1011	3	30	97.67	0.57	19.444	1.17e-25	0.323142
Correlated	GLYAT	glycine-N-acyltransferase [Source:HGNC Symbol;Acc:13734]	11	q12.1	-1	58407899	58499447	ENSG00000149124	-	1054	8	1014	4	28	98.05	0.76	19.519	7.08e-34	0.373715
Correlated	GLYCTK	glycerate kinase [Source:HGNC Symbol;Acc:24247]	3	p21.1	1	52321105	52329272	ENSG00000168237	-	1012	6	973	4	29	94.14	0.59	17.349	8.05e-23	0.309124
Correlated	GMDS	GDP-mannose 4,6-dehydratase [Source:HGNC Symbol;Acc:4369]	6	p25.3	-1	1624041	2245926	ENSG00000112699	+	962	6	930	3	23	89.49	0.62	22.115	3.24e-29	0.361762
Correlated	GMFG	glia maturation factor, gamma [Source:HGNC Symbol;Acc:4374]	19	q13.2	-1	39818993	39833012	ENSG00000130755	+	921	5	891	1	24	85.67	0.54	26.466	1.57e-29	0.371821
Correlated	GMFG	glia maturation factor, gamma [Source:HGNC Symbol;Acc:4374]	19	q13.2	-1	39818993	39833012	ENSG00000130755	-	921	6	891	1	23	85.67	0.65	27.222	3.64e-36	0.413764
Correlated	GMNN	geminin, DNA replication inhibitor [Source:HGNC Symbol;Acc:17493]	6	p22.3	1	24775159	24786327	ENSG00000112312	+	953	7	914	8	24	88.65	0.73	14.346	1.25e-21	0.30947
Correlated	GNAI1	guanine nucleotide binding protein (G protein), alpha inhibiting activity polypeptide 1 [Source:HGNC Symbol;Acc:4384]	7	q21.11	1	79763271	79848718	ENSG00000127955	-	1060	11	1015	10	24	98.6	1.04	15.864	4.98e-37	0.390488
Correlated	GNAI2	guanine nucleotide binding protein (G protein), alpha inhibiting activity polypeptide 2 [Source:HGNC Symbol;Acc:4385]	HG325_PATCH	p21.31	1	50263724	50296787	ENSG00000263156	-	949	7	917	3	22	88.28	0.74	22.907	4.05e-35	0.401378
Correlated	GNAL	guanine nucleotide binding protein (G protein), alpha activating activity polypeptide, olfactory type [Source:HGNC Symbol;Acc:4388]	18	p11.21	1	11688955	11885684	ENSG00000141404	-	883	11	846	10	16	82.14	1.25	17.131	2.75e-40	0.447146
Correlated	GNAO1	guanine nucleotide binding protein (G protein), alpha activating activity polypeptide O [Source:HGNC Symbol;Acc:4389]	16	q12.2	1	56225302	56391356	ENSG00000087258	-	1065	10	1020	7	28	99.07	0.94	16.486	3.3e-35	0.379395
Correlated	GNAS	GNAS complex locus [Source:HGNC Symbol;Acc:4392]	20	q13.32	1	57414773	57486247	ENSG00000087460	-	1069	16	1010	21	22	99.44	1.5	12.165	3.46e-40	0.405866
Correlated	GNB2L1	guanine nucleotide binding protein (G protein), beta polypeptide 2-like 1 [Source:HGNC Symbol;Acc:4399]	5	q35.3	-1	180663909	180675096	ENSG00000204628	+	941	7	907	4	23	87.53	0.74	19.961	1.68e-30	0.374204
Correlated	GNB5	guanine nucleotide binding protein (G protein), beta 5 [Source:HGNC Symbol;Acc:4401]	15	q21.2	-1	52413117	52483566	ENSG00000069966	-	974	14	931	12	17	90.6	1.44	16.918	0	0.477968
Correlated	GNG2	guanine nucleotide binding protein (G protein), gamma 2 [Source:HGNC Symbol;Acc:4404]	14	q22.1	1	52292913	52446060	ENSG00000186469	-	1012	11	956	19	26	94.14	1.09	10.029	1.38e-22	0.307422
Correlated	GNG3	guanine nucleotide binding protein (G protein), gamma 3 [Source:HGNC Symbol;Acc:4405]	11	q12.3	1	62475130	62476673	ENSG00000162188	-	941	5	910	2	24	87.53	0.53	23.177	8.44e-26	0.342363
Correlated	GNG7	guanine nucleotide binding protein (G protein), gamma 7 [Source:HGNC Symbol;Acc:4410]	19	p13.3	-1	2511217	2702707	ENSG00000176533	-	1055	10	1006	12	27	98.14	0.95	12.961	3.13e-27	0.33277
Correlated	GNL3L	guanine nucleotide binding protein-like 3 (nucleolar)-like [Source:HGNC Symbol;Acc:25553]	X	p11.22	1	54556644	54587504	ENSG00000130119	+	956	7	922	4	23	88.93	0.73	20.279	5.48e-31	0.374382
Correlated	GOLGA7B	golgin A7 family, member B [Source:HGNC Symbol;Acc:31668]	10	q24.2	1	99609996	99631337	ENSG00000155265	-	970	5	935	1	29	90.23	0.52	23.775	1.48e-26	0.342443
Correlated	GOLGA8G	golgin A8 family, member G [Source:HGNC Symbol;Acc:25328]	HSCHR15_1_CTG4	q13.1	-1	28776381	28789737	ENSG00000262872	-	866	5	836	2	23	80.56	0.58	22.092	1.29e-24	0.348036
Correlated	GOLGA8H	golgin A8 family, member H [Source:HGNC Symbol;Acc:37443]	15	q13.2	1	30896329	30906764	ENSG00000261794	-	821	11	789	5	16	76.37	1.34	20.905	0	0.517485
Correlated	GOLGA8I	golgin A8 family, member I						unknown	+	825	3	797	0	25	76.74	0.36	29.464	2.09e-20	0.322311
Correlated	GOLIM4	golgi integral membrane protein 4 [Source:HGNC Symbol;Acc:15448]	3	q26.2	-1	167726465	167813763	ENSG00000173905	+	1065	8	1022	7	28	99.07	0.75	15.778	4.21e-27	0.330372
Correlated	GOT2	glutamic-oxaloacetic transaminase 2, mitochondrial [Source:HGNC Symbol;Acc:4433]	16	q21	-1	58741035	58768261	ENSG00000125166	+	954	5	922	1	26	88.74	0.52	25.645	1.28e-28	0.359321
Correlated	GP1BA	glycoprotein Ib (platelet), alpha polypeptide [Source:HGNC Symbol;Acc:4439]	17	p13.2	1	4835592	4838325	ENSG00000185245	-	939	4	909	1	25	87.35	0.43	25.903	2.12e-23	0.325274
Correlated	GP1BB	glycoprotein Ib (platelet), beta polypeptide [Source:HGNC Symbol;Acc:4440]	22	q11.21	1	19710468	19712294	ENSG00000203618	-	911	9	874	10	18	84.74	0.99	15.982	8.86e-31	0.382149
Correlated	GPANK1	G patch domain and ankyrin repeats 1 [Source:HGNC Symbol;Acc:13920]	HSCHR6_MHC_COX	p21.33	-1	31616421	31621476	ENSG00000236011	+	1044	10	1004	5	25	97.12	0.96	19.886	7.52e-43	0.424678
Correlated	GPAT2	glycerol-3-phosphate acyltransferase 2, mitochondrial [Source:HGNC Symbol;Acc:27168]	2	q11.1	-1	96687694	96705199	ENSG00000186281	-	987	10	950	2	25	91.81	1.01	23.5	0	0.478615
Correlated	GPATCH2	G patch domain containing 2 [Source:HGNC Symbol;Acc:25499]	1	q41	-1	217600334	217804424	ENSG00000092978	+	1063	11	1012	13	27	98.88	1.03	12.821	1.67e-29	0.345933
Correlated	GPHA2	glycoprotein hormone alpha 2 [Source:HGNC Symbol;Acc:18054]	11	q13.1	-1	64701943	64703360	ENSG00000149735	-	1008	6	972	1	29	93.77	0.6	24.686	8.57e-33	0.375661
Correlated	GPHN	gephyrin [Source:HGNC Symbol;Acc:15465]	14	q23.3	1	66974125	67648520	ENSG00000171723	-	1068	10	1022	11	25	99.35	0.94	14.531	9.62e-31	0.352726
Correlated	GPHN	gephyrin [Source:HGNC Symbol;Acc:15465]	14	q23.3	1	66974125	67648520	ENSG00000171723	+	1068	8	1030	3	27	99.35	0.75	22.192	1.15e-38	0.397941
Correlated	GPM6B	glycoprotein M6B [Source:HGNC Symbol;Acc:4461]	X	p22.2	-1	13789150	13956757	ENSG00000046653	-	950	10	906	13	21	88.37	1.05	13.324	4.31e-28	0.356532
Correlated	GPR114	G protein-coupled receptor 114 [Source:HGNC Symbol;Acc:19010]	16	q21	1	57576333	57625593	ENSG00000159618	-	1005	7	965	4	29	93.49	0.7	17.765	4.44e-27	0.339938
Correlated	GPR116	G protein-coupled receptor 116 [Source:HGNC Symbol;Acc:19030]	6	p12.3	-1	46820249	46922680	ENSG00000069122	-	957	6	922	4	25	89.02	0.63	18.523	2.16e-24	0.329457
Correlated	GPR12	G protein-coupled receptor 12 [Source:HGNC Symbol;Acc:4466]	13	q12.13	-1	27329341	27334922	ENSG00000132975	-	933	5	902	3	23	86.79	0.54	20.826	3.92e-23	0.324311
Correlated	GPR123	G protein-coupled receptor 123 [Source:HGNC Symbol;Acc:13838]	10	q26.3	1	134884433	134945179	ENSG00000197177	-	962	8	926	0	28	89.49	0.83	26.722	0	0.464435
Correlated	GPR124	G protein-coupled receptor 124 [Source:HGNC Symbol;Acc:17849]	8	p11.23	1	37641709	37702414	ENSG00000020181	-	937	7	903	5	22	87.16	0.75	18.848	9.96e-29	0.363294
Correlated	GPR133	G protein-coupled receptor 133 [Source:HGNC Symbol;Acc:19893]	12	q24.33	1	131438452	131626014	ENSG00000111452	-	994	8	953	6	27	92.47	0.8	16.229	5.76e-28	0.347724
Correlated	GPR137	G protein-coupled receptor 137 [Source:HGNC Symbol;Acc:24300]	11	q13.1	1	64037534	64056972	ENSG00000173264	-	963	7	928	5	23	89.58	0.73	18.725	1.58e-28	0.357031
Correlated	GPR137B	G protein-coupled receptor 137B [Source:HGNC Symbol;Acc:11862]	1	q42.3	1	236305832	236385165	ENSG00000077585	-	970	7	933	8	22	90.23	0.72	15.609	1.37e-23	0.321421
Correlated	GPR155	G protein-coupled receptor 155 [Source:HGNC Symbol;Acc:22951]	2	q31.1	-1	175296966	175351822	ENSG00000163328	-	1016	10	969	11	26	94.51	0.98	13.439	2.45e-28	0.34636
Correlated	GPR158	G protein-coupled receptor 158 [Source:HGNC Symbol;Acc:23689]	10	p12.1	1	25463991	25891155	ENSG00000151025	-	1010	7	969	6	28	93.95	0.69	15.538	1.58e-23	0.314539
Correlated	GPR161	G protein-coupled receptor 161 [Source:HGNC Symbol;Acc:23694]	1	q24.2	-1	168053997	168106821	ENSG00000143147	+	1053	12	1005	12	24	97.95	1.14	14.625	5.62e-37	0.391494
Correlated	GPR183	G protein-coupled receptor 183 [Source:HGNC Symbol;Acc:3128]	13	q32.3	-1	99946784	99959659	ENSG00000169508	-	937	8	896	12	21	87.16	0.85	12.924	5.77e-22	0.314712
Correlated	GPR26	G protein-coupled receptor 26 [Source:HGNC Symbol;Acc:4481]	10	q26.13	1	125425871	125454123	ENSG00000154478	-	1003	7	963	5	28	93.3	0.7	16.717	2.12e-25	0.32886
Correlated	GPR27	G protein-coupled receptor 27 [Source:HGNC Symbol;Acc:4482]	3	p13	1	71803201	71805647	ENSG00000170837	-	1047	12	1002	10	23	97.4	1.15	16.317	1.5e-41	0.417315
Correlated	GPR37	G protein-coupled receptor 37 (endothelin receptor type B-like) [Source:HGNC Symbol;Acc:4494]	7	q31.33	-1	124386051	124405681	ENSG00000170775	-	935	10	899	7	19	86.98	1.07	18.966	8.5e-41	0.437399
Correlated	GPR56	G protein-coupled receptor 56 [Source:HGNC Symbol;Acc:4512]	16	q21	1	57644564	57698944	ENSG00000205336	+	950	11	907	14	18	88.37	1.16	14.414	1.7e-33	0.391309
Correlated	GPR6	G protein-coupled receptor 6 [Source:HGNC Symbol;Acc:4515]	6	q21	1	110299514	110301921	ENSG00000146360	-	917	8	885	3	21	85.3	0.87	22.997	3.75e-40	0.438012
Correlated	GPR62	G protein-coupled receptor 62 [Source:HGNC Symbol;Acc:13301]	3	p21.2	1	51989330	51991509	ENSG00000180929	-	896	6	864	4	22	83.35	0.67	19.2	2.61e-25	0.347275
Correlated	GPR82	G protein-coupled receptor 82 [Source:HGNC Symbol;Acc:4533]	X	p11.4	1	41583408	41589388	ENSG00000171657	+	997	7	958	4	28	92.74	0.7	18.127	1.21e-27	0.345058
Correlated	GPR98	G protein-coupled receptor 98 [Source:HGNC Symbol;Acc:17416]	5	q14.3	1	89825161	90460038	ENSG00000164199	-	1056	7	1014	6	29	98.23	0.66	15.795	6.52e-24	0.310307
Correlated	GPRASP1	G protein-coupled receptor associated sorting protein 1 [Source:HGNC Symbol;Acc:24834]	X	q22.1	1	101906294	101914011	ENSG00000198932	-	960	11	917	14	18	89.3	1.15	14.566	7.33e-34	0.391494
Correlated	GPRASP2	G protein-coupled receptor associated sorting protein 2 [Source:HGNC Symbol;Acc:25169]	X	q22.1	1	101967104	101973607	ENSG00000158301	-	1015	9	973	7	26	94.42	0.89	16.312	1.87e-31	0.366222
Correlated	GPSM1	G-protein signaling modulator 1 [Source:HGNC Symbol;Acc:17858]	HG998_2_PATCH	q34.3	1	139235598	139267507	ENSG00000260789	-	1062	7	1021	6	28	98.79	0.66	16.338	9.37e-25	0.315221
Correlated	GPSM2	G-protein signaling modulator 2 [Source:HGNC Symbol;Acc:29501]	1	p13.3	1	109417972	109473044	ENSG00000121957	+	1060	13	1002	21	24	98.6	1.23	10.954	3.27e-29	0.344605
Correlated	GPSM3	G-protein signaling modulator 3 [Source:HGNC Symbol;Acc:13945]	HSCHR6_MHC_APD	p21.32	-1	32169884	32174641	ENSG00000237052	-	963	4	933	1	25	89.58	0.42	26.566	5.56e-24	0.325449
Correlated	GPT	glutamic-pyruvate transaminase (alanine aminotransferase) [Source:HGNC Symbol;Acc:4552]	8	q24.3	1	145728356	145732557	ENSG00000167701	+	923	4	894	1	24	85.86	0.43	26.371	8.15e-24	0.331189
Correlated	GPX7	glutathione peroxidase 7 [Source:HGNC Symbol;Acc:4559]	1	p32.3	1	53068044	53074723	ENSG00000116157	-	920	8	886	5	21	85.58	0.87	19.523	6.93e-34	0.400063
Correlated	GPX8	glutathione peroxidase 8 (putative) [Source:HGNC Symbol;Acc:33100]	5	q11.2	1	54455946	54462899	ENSG00000164294	+	1033	15	984	12	22	96.09	1.45	15.511	0	0.458181
Correlated	GRAMD1A	GRAM domain containing 1A [Source:HGNC Symbol;Acc:29305]	19	q13.11	1	35485688	35517375	ENSG00000089351	-	1064	6	1024	4	30	98.98	0.56	17.733	2.54e-23	0.305012
Correlated	GRASP	GRP1 (general receptor for phosphoinositides 1)-associated scaffold protein [Source:HGNC Symbol;Acc:18707]	12	q13.13	1	52400724	52409673	ENSG00000161835	-	1044	5	1007	2	30	97.12	0.48	21.306	1.02e-23	0.310724
Correlated	GRB14	growth factor receptor-bound protein 14 [Source:HGNC Symbol;Acc:4565]	2	q24.3	-1	165349322	165478358	ENSG00000115290	-	956	9	918	7	22	88.93	0.94	17.347	1.49e-33	0.390425
Correlated	GREM1	gremlin 1, DAN family BMP antagonist [Source:HGNC Symbol;Acc:2001]	15	q13.3	1	33010175	33026870	ENSG00000166923	-	953	10	916	8	19	88.65	1.05	18.257	3.53e-39	0.424181
Correlated	GRHL3	grainyhead-like 3 (Drosophila) [Source:HGNC Symbol;Acc:25839]	1	p36.11	1	24645812	24690972	ENSG00000158055	+	1029	7	988	6	28	95.72	0.68	15.831	5.64e-24	0.314796
Correlated	GRIK1	glutamate receptor, ionotropic, kainate 1 [Source:HGNC Symbol;Acc:4579]	21	q21.3	-1	30909254	31312351	ENSG00000171189	-	954	4	922	1	27	88.74	0.42	24.619	2.88e-22	0.314195
Correlated	GRIN1	glutamate receptor, ionotropic, N-methyl D-aspartate 1 [Source:HGNC Symbol;Acc:4584]	9	q34.3	1	140032842	140063207	ENSG00000176884	-	944	7	913	1	23	87.81	0.74	27.533	1.9e-42	0.444413
Correlated	GRIN2A	glutamate receptor, ionotropic, N-methyl D-aspartate 2A [Source:HGNC Symbol;Acc:4585]	16	p13.2	-1	9852376	10276611	ENSG00000183454	-	1049	8	1007	5	29	97.58	0.76	17.447	3.74e-30	0.352281
Correlated	GRIN2C	glutamate receptor, ionotropic, N-methyl D-aspartate 2C [Source:HGNC Symbol;Acc:4587]	17	q25.1	-1	72838162	72857627	ENSG00000161509	-	926	6	897	0	23	86.14	0.65	31.931	1.59e-42	0.449137
Correlated	GRK7	G protein-coupled receptor kinase 7 [Source:HGNC Symbol;Acc:17031]	3	q23	1	141496990	141537332	ENSG00000114124	+	885	4	857	0	24	82.33	0.45	31.607	1.41e-28	0.372781
Correlated	GRM1	glutamate receptor, metabotropic 1 [Source:HGNC Symbol;Acc:4593]	6	q24.3	1	146348782	146758734	ENSG00000152822	-	826	4	797	2	23	76.84	0.48	20.395	1.87e-18	0.304978
Correlated	GRM2	glutamate receptor, metabotropic 2 [Source:HGNC Symbol;Acc:4594]	3	p21.2	1	51741086	51752629	ENSG00000164082	-	1045	5	1009	0	31	97.21	0.48	29.028	1.77e-32	0.367082
Correlated	GRM3	glutamate receptor, metabotropic 3 [Source:HGNC Symbol;Acc:4595]	7	q21.11	1	86273230	86494200	ENSG00000198822	-	945	7	910	5	23	87.91	0.74	18.375	5.43e-28	0.3568
Correlated	GRM7	glutamate receptor, metabotropic 7 [Source:HGNC Symbol;Acc:4599]	3	p26.1	1	6811688	7783215	ENSG00000196277	-	1027	6	986	3	32	95.53	0.58	18.018	9.06e-24	0.313645
Correlated	GRM8	glutamate receptor, metabotropic 8 [Source:HGNC Symbol;Acc:4600]	7	q31.33	-1	126078652	126893348	ENSG00000179603	-	942	6	911	2	23	87.63	0.64	24.362	2.83e-32	0.385342
Correlated	GRP	gastrin-releasing peptide [Source:HGNC Symbol;Acc:4605]	18	q21.32	1	56887400	56898006	ENSG00000134443	-	930	6	895	6	23	86.51	0.65	16.034	5.23e-21	0.308386
Correlated	GRPR	gastrin-releasing peptide receptor [Source:HGNC Symbol;Acc:4609]	X	p22.2	1	16141679	16171144	ENSG00000126010	-	931	7	900	2	22	86.6	0.75	24.969	2.16e-38	0.424627
Correlated	GRTP1	growth hormone regulated TBC protein 1 [Source:HGNC Symbol;Acc:20310]	13	q34	-1	113978505	114018446	ENSG00000139835	+	1043	14	1000	5	24	97.02	1.34	20.224	0	0.509199
Correlated	GSC2	goosecoid homeobox 2 [Source:HGNC Symbol;Acc:4613]	HG329_PATCH	q11.21	-1	19136089	19137796	ENSG00000267876	-	890	3	862	0	25	82.79	0.34	31.786	6.18e-22	0.322681
Correlated	GSTM1	glutathione S-transferase mu 1 [Source:HGNC Symbol;Acc:4632]	1	p13.3	1	110230436	110251661	ENSG00000134184	-	939	8	897	13	21	87.35	0.85	12.335	6.71e-21	0.306046
Correlated	GSTM3	glutathione S-transferase mu 3 (brain) [Source:HGNC Symbol;Acc:4635]	1	p13.3	-1	110276554	110284384	ENSG00000134202	-	1048	9	1003	9	27	97.49	0.86	14.556	7.3e-28	0.337984
Correlated	GSTM4	glutathione S-transferase mu 4 [Source:HGNC Symbol;Acc:4636]	1	p13.3	1	110198703	110208118	ENSG00000168765	-	933	6	897	5	25	86.79	0.64	16.416	1.49e-21	0.312171
Correlated	GSTM5	glutathione S-transferase mu 5 [Source:HGNC Symbol;Acc:4637]	1	p13.3	1	110254864	110318050	ENSG00000134201	-	941	13	907	5	16	87.53	1.38	23.435	0	0.558677
Correlated	GSTO2	glutathione S-transferase omega 2 [Source:HGNC Symbol;Acc:23064]	10	q25.1	1	106028631	106059616	ENSG00000065621	-	1041	10	991	13	27	96.84	0.96	12.233	1.35e-25	0.324121
Correlated	GTDC1	glycosyltransferase-like domain containing 1 [Source:HGNC Symbol;Acc:20887]	2	q22.3	-1	144703321	145090135	ENSG00000121964	-	1066	8	1024	6	28	99.16	0.75	16.921	3.62e-29	0.34336
Correlated	GTF2IRD2	GTF2I repeat domain containing 2 [Source:HGNC Symbol;Acc:30775]	7	q11.23	-1	74210483	74267847	ENSG00000196275	+	1051	10	1004	9	28	97.77	0.95	14.557	7.38e-31	0.356271
Correlated	GTSE1	G-2 and S-phase expressed 1 [Source:HGNC Symbol;Acc:13698]	22	q13.31	1	46692638	46726707	ENSG00000075218	+	1042	13	996	11	22	96.93	1.25	16.126	2.1e-44	0.432993
Correlated	GUCA1A	guanylate cyclase activator 1A (retina) [Source:HGNC Symbol;Acc:4678]	6	p21.1	1	42123144	42147794	ENSG00000048545	-	1053	8	1007	8	30	97.95	0.76	13.855	1.17e-23	0.308966
Correlated	GUCY1A3	guanylate cyclase 1, soluble, alpha 3 [Source:HGNC Symbol;Acc:4685]	4	q32.1	1	156587863	156653501	ENSG00000164116	-	1067	16	1015	14	22	99.26	1.5	14.975	0	0.456794
Correlated	GUCY1B3	guanylate cyclase 1, soluble, beta 3 [Source:HGNC Symbol;Acc:4687]	4	q32.1	1	156680144	156728743	ENSG00000061918	-	948	12	907	10	19	88.19	1.27	16.68	1.29e-42	0.444383
Correlated	GYG2	glycogenin 2 [Source:HGNC Symbol;Acc:4700]	X	p22.33	1	2746829	2800859	ENSG00000056998	+	951	8	914	6	23	88.47	0.84	17.53	2.71e-30	0.370897
Correlated	GYPC	glycophorin C (Gerbich blood group) [Source:HGNC Symbol;Acc:4704]	2	q14.3	1	127413509	127454246	ENSG00000136732	+	953	7	918	4	24	88.65	0.73	19.563	7.01e-30	0.36782
Correlated	GYPC	glycophorin C (Gerbich blood group) [Source:HGNC Symbol;Acc:4704]	2	q14.3	1	127413509	127454246	ENSG00000136732	-	953	6	919	3	25	88.65	0.63	20.495	4.52e-27	0.349032
Correlated	H2AFJ	H2A histone family, member J [Source:HGNC Symbol;Acc:14456]	12	p12.3	1	14927270	14930936	ENSG00000246705	+	1039	8	994	10	27	96.65	0.77	13.194	1.96e-22	0.30229
Correlated	H2AFV	H2A histone family, member V [Source:HGNC Symbol;Acc:20664]	7	p13	-1	44866390	44887682	ENSG00000105968	+	1065	13	1020	9	23	99.07	1.22	17.481	0	0.447711
Correlated	H2AFY	H2A histone family, member Y [Source:HGNC Symbol;Acc:4740]	5	q31.1	-1	134669590	134735604	ENSG00000113648	-	1068	9	1021	9	29	99.35	0.84	14.053	7.56e-27	0.328256
Correlated	H2AFY	H2A histone family, member Y [Source:HGNC Symbol;Acc:4740]	5	q31.1	-1	134669590	134735604	ENSG00000113648	+	1068	10	1019	11	28	99.35	0.94	13.383	3.47e-28	0.336862
Correlated	H2BFXP	H2B histone family, member X, pseudogene [Source:HGNC Symbol;Acc:25757]	X	q22.2	1	103230535	103230898	ENSG00000233320	+	933	7	894	4	28	86.79	0.75	16.964	7.39e-26	0.344238
Correlated	H3F3A	H3 histone, family 3A [Source:HGNC Symbol;Acc:4764]	1	q42.12	1	226249552	226259702	ENSG00000163041	+	1024	6	987	1	30	95.26	0.59	24.381	2.18e-32	0.370274
Correlated	HABP4	hyaluronan binding protein 4 [Source:HGNC Symbol;Acc:17062]	9	q22.32	1	99212483	99253618	ENSG00000130956	-	1066	9	1022	6	29	99.16	0.84	16.832	1.64e-32	0.363633
Correlated	HACL1	2-hydroxyacyl-CoA lyase 1 [Source:HGNC Symbol;Acc:17856]	3	p25.1	-1	15602211	15643338	ENSG00000131373	-	1063	9	1016	12	26	98.88	0.85	13.016	1.04e-24	0.314764
Correlated	HAL	histidine ammonia-lyase [Source:HGNC Symbol;Acc:4806]	12	q23.1	-1	96366440	96390143	ENSG00000084110	+	1041	9	992	12	28	96.84	0.86	12.058	8.57e-23	0.304591
Correlated	HAPLN2	hyaluronan and proteoglycan link protein 2 [Source:HGNC Symbol;Acc:17410]	1	q23.1	1	156589086	156595517	ENSG00000132702	-	935	5	904	2	24	86.98	0.53	23.03	1.22e-25	0.342307
Correlated	HAPLN3	hyaluronan and proteoglycan link protein 3 [Source:HGNC Symbol;Acc:21446]	15	q26.1	-1	89420519	89438857	ENSG00000140511	-	1016	6	980	0	30	94.51	0.59	28.222	1.3e-37	0.402139
Correlated	HAS1	hyaluronan synthase 1 [Source:HGNC Symbol;Acc:4818]	19	q13.41	-1	52216365	52227247	ENSG00000105509	-	930	6	901	0	23	86.51	0.65	32.069	1.05e-42	0.449162
Correlated	HAUS2	HAUS augmin-like complex, subunit 2 [Source:HGNC Symbol;Acc:25530]	15	q15.2	1	42841008	42862192	ENSG00000137814	+	1060	9	1022	2	27	98.6	0.85	24.091	0	0.443354
Correlated	HAUS6	HAUS augmin-like complex, subunit 6 [Source:HGNC Symbol;Acc:25948]	9	p22.1	-1	19053141	19103117	ENSG00000147874	+	1058	10	1017	6	25	98.42	0.95	18.893	1.36e-40	0.410112
Correlated	HBB	hemoglobin, beta [Source:HGNC Symbol;Acc:4827]	11	p15.4	-1	5246694	5250625	ENSG00000244734	-	932	7	898	5	22	86.7	0.75	18.747	1.42e-28	0.363228
Correlated	HBG1	hemoglobin, gamma A [Source:HGNC Symbol;Acc:4831]	11	p15.4	-1	5269313	5271122	ENSG00000213934	-	909	5	877	1	26	84.56	0.55	24.435	2.7e-27	0.358954
Correlated	HBG2	hemoglobin, gamma G [Source:HGNC Symbol;Acc:4832]	11	p15.4	-1	5274420	5667019	ENSG00000196565	-	893	5	860	2	26	83.07	0.56	20.576	6.16e-23	0.329977
Correlated	HCFC1R1	host cell factor C1 regulator 1 (XPO1 dependent) [Source:HGNC Symbol;Acc:21198]	16	p13.3	-1	3072621	3074287	ENSG00000103145	-	972	8	933	8	23	90.42	0.82	15.677	6.27e-27	0.344641
Correlated	HCG11	HLA complex group 11 (non-protein coding) [Source:HGNC Symbol;Acc:17707]	6	p22.2	1	26522076	26526807	ENSG00000228223	-	869	7	832	10	20	80.84	0.81	13.253	6.46e-20	0.30993
Correlated	HCLS1	hematopoietic cell-specific Lyn substrate 1 [Source:HGNC Symbol;Acc:4844]	3	q13.33	-1	121350246	121379774	ENSG00000180353	-	954	7	921	2	24	88.74	0.73	23.935	8.7e-37	0.410198
Correlated	HCN1	hyperpolarization activated cyclic nucleotide-gated potassium channel 1 [Source:HGNC Symbol;Acc:4845]	5	p12	-1	45259349	45696253	ENSG00000164588	-	942	9	910	3	20	87.63	0.96	24.362	0	0.47296
Correlated	HCN2	hyperpolarization activated cyclic nucleotide-gated potassium channel 2 [Source:HGNC Symbol;Acc:4846]	19	p13.3	1	589893	617159	ENSG00000099822	-	944	5	914	1	24	87.81	0.53	27.126	2.98e-30	0.372
Correlated	HCST	hematopoietic cell signal transducer [Source:HGNC Symbol;Acc:16977]	19	q13.12	1	36393382	36395279	ENSG00000126264	-	1021	5	983	2	31	94.98	0.49	20.258	1.45e-22	0.305895
Correlated	HDAC1	histone deacetylase 1 [Source:HGNC Symbol;Acc:4852]	1	p35.1	1	32757687	32799236	ENSG00000116478	+	971	5	938	2	26	90.33	0.51	22.373	6.59e-25	0.330749
Correlated	HDAC10	histone deacetylase 10 [Source:HGNC Symbol;Acc:18128]	22	q13.33	-1	50683612	50689834	ENSG00000100429	-	1024	6	983	4	31	95.26	0.59	16.605	7.86e-22	0.300053
Correlated	HDAC6	histone deacetylase 6 [Source:HGNC Symbol;Acc:14064]	HG1436_HG1432_PATCH	p11.23	1	48660776	48684381	ENSG00000269101	+	963	7	929	5	22	89.58	0.73	19.371	1.57e-29	0.363623
Correlated	HDAC8	histone deacetylase 8 [Source:HGNC Symbol;Acc:13315]	HG1438_PATCH	q13.1	-1	71549366	71792953	ENSG00000268498	+	1048	6	1008	4	30	97.49	0.57	17.467	5.7e-23	0.304837
Correlated	HDAC9	histone deacetylase 9 [Source:HGNC Symbol;Acc:14065]	7	p21.1	1	18126572	19036993	ENSG00000048052	-	1059	10	1009	13	27	98.51	0.94	12.444	4.65e-26	0.324447
Correlated	HDC	histidine decarboxylase [Source:HGNC Symbol;Acc:4855]	15	q21.2	-1	50534144	50558223	ENSG00000140287	-	942	8	909	4	21	87.63	0.85	21.655	1.06e-37	0.418159
Correlated	HDGF	hepatoma-derived growth factor [Source:HGNC Symbol;Acc:4856]	1	q23.1	-1	156711899	156736717	ENSG00000143321	+	949	5	918	2	24	88.28	0.53	23.374	5.13e-26	0.342436
Correlated	HDGFRP3	hepatoma-derived growth factor, related protein 3 [UniGene: Transcribed locus///Hepatoma-derived growth factor, related protein 3]						unknown	-	1065	11	1018	11	25	99.07	1.03	14.792	2.24e-34	0.374653
Correlated	HDLBP	high density lipoprotein binding protein [Source:HGNC Symbol;Acc:4857]	2	q37.3	-1	242166679	242256476	ENSG00000115677	-	1065	9	1024	6	26	99.07	0.85	18.257	2.36e-35	0.38022
Correlated	HEATR2	HEAT repeat containing 2 [Source:HGNC Symbol;Acc:26013]	7	p22.3	1	766338	829190	ENSG00000164818	+	970	6	940	1	23	90.23	0.62	28.67	4.6e-38	0.414141
Correlated	HEATR6	HEAT repeat containing 6 [Source:HGNC Symbol;Acc:24076]	17	q23.1	-1	58120555	58156292	ENSG00000068097	+	968	6	937	2	23	90.05	0.62	25.034	3.71e-33	0.385576
Correlated	HELLS	helicase, lymphoid-specific [Source:HGNC Symbol;Acc:4861]	10	q23.33	1	96305547	96373662	ENSG00000119969	+	1053	15	999	16	23	97.95	1.42	13.408	6.13e-42	0.418145
Correlated	HENMT1	HEN1 methyltransferase homolog 1 (Arabidopsis) [Source:HGNC Symbol;Acc:26400]	1	p13.3	-1	109190912	109204148	ENSG00000162639	-	1019	11	974	10	24	94.79	1.08	15.25	1.49e-35	0.389858
Correlated	HEPH	hephaestin [Source:HGNC Symbol;Acc:4866]	X	q12	1	65382391	65488709	ENSG00000089472	+	948	7	915	4	22	88.19	0.74	20.803	8.41e-32	0.381143
Correlated	HERC2P3	hect domain and RLD 2 pseudogene 3 [Source:HGNC Symbol;Acc:4871]	15	q11.2	-1	20587869	20711433	ENSG00000180229	-	851	4	825	0	22	79.16	0.47	32.731	1.43e-29	0.387105
Correlated	HERC4	HECT and RLD domain containing E3 ubiquitin protein ligase 4 [Source:HGNC Symbol;Acc:24521]	10	q21.3	-1	69681665	69835105	ENSG00000148634	-	1050	7	1009	6	28	97.67	0.67	16.154	1.8e-24	0.315069
Correlated	HES1	hairy and enhancer of split 1, (Drosophila) [Source:HGNC Symbol;Acc:5192]	3	q29	1	193853934	193856521	ENSG00000114315	+	939	12	879	31	17	87.35	1.28	9.0361	5.96e-22	0.31427
Correlated	HES6	hairy and enhancer of split 6 (Drosophila) [Source:HGNC Symbol;Acc:18254]	2	q37.3	-1	239146908	239149303	ENSG00000144485	+	1054	12	998	20	24	98.05	1.14	10.979	4.25e-27	0.332064
Correlated	HEXIM1	hexamethylene bis-acetamide inducible 1 [Source:HGNC Symbol;Acc:24953]	17	q21.31	1	43224684	43229468	ENSG00000186834	+	1075	10	1026	11	28	100	0.93	13.471	2.23e-28	0.336976
Correlated	HEYL	hairy/enhancer-of-split related with YRPW motif-like [Source:HGNC Symbol;Acc:4882]	1	p34.2	-1	40089825	40105617	ENSG00000163909	+	1037	7	997	4	29	96.47	0.68	18.331	6.03e-28	0.340311
Correlated	HFE	hemochromatosis [Source:HGNC Symbol;Acc:4886]	6	p22.2	1	26087509	26098571	ENSG00000010704	-	1064	10	1015	11	28	98.98	0.94	13.333	4.47e-28	0.336795
Correlated	HFM1	HFM1, ATP-dependent DNA helicase homolog (S. cerevisiae) [Source:HGNC Symbol;Acc:20193]	1	p22.2	-1	91726323	91870426	ENSG00000162669	+	944	6	907	2	29	87.81	0.64	20.229	8.43e-27	0.348824
Correlated	HHIP	hedgehog interacting protein [Source:HGNC Symbol;Acc:14866]	4	q31.21	1	145567173	145666423	ENSG00000164161	-	1037	9	989	13	26	96.47	0.87	12.121	6.6e-23	0.305995
Correlated	HHIPL2	HHIP-like 2 [Source:HGNC Symbol;Acc:25842]	1	q41	-1	222695602	222721445	ENSG00000143512	+	906	3	877	0	26	84.28	0.33	31.241	1.42e-21	0.31697
Correlated	HID1	HID1 domain containing [UniGene: NA]						unknown	-	1047	7	1006	6	28	97.4	0.67	16.108	2.12e-24	0.315031
Correlated	HIGD1A	HIG1 hypoxia inducible domain family, member 1A [Source:HGNC Symbol;Acc:29527]	3	p22.1	-1	42798669	42846023	ENSG00000181061	-	1066	8	1026	5	27	99.16	0.75	18.743	1.92e-32	0.363233
Correlated	HIGD1B	HIG1 hypoxia inducible domain family, member 1B [Source:HGNC Symbol;Acc:24318]	17	q21.31	1	42923721	42927848	ENSG00000131097	-	928	4	898	1	25	86.33	0.43	25.6	3.91e-23	0.325191
Correlated	HIP1R	huntingtin interacting protein 1 related [Source:HGNC Symbol;Acc:18415]	12	q24.31	1	123319000	123347507	ENSG00000130787	-	924	7	889	6	22	85.95	0.76	17.156	4.54e-26	0.347414
Correlated	HIST1H1C	histone cluster 1, H1c [Source:HGNC Symbol;Acc:4716]	6	p22.2	-1	26055968	26056699	ENSG00000187837	+	974	11	927	16	20	90.6	1.13	12.8	1.75e-29	0.36127
Correlated	HIST1H2AB	histone cluster 1, H2ab [Source:HGNC Symbol;Acc:4734]	6	p22.2	-1	26033320	26033796	ENSG00000137259	+	939	5	909	1	24	87.35	0.53	26.983	4.28e-30	0.371962
Correlated	HIST1H2AC	histone cluster 1, H2ac [Source:HGNC Symbol;Acc:4733]	6	p22.2	1	26124373	26139344	ENSG00000180573	+	952	13	894	27	18	88.56	1.37	9.9806	1.81e-26	0.345057
Correlated	HIST1H2AG	histone cluster 1, H2ag [Source:HGNC Symbol;Acc:4737]	6	p22.1	1	27100832	27103070	ENSG00000196787	+	932	13	896	8	15	86.7	1.39	20.605	0	0.523868
Correlated	HIST1H2AI	histone cluster 1, H2ai [Source:HGNC Symbol;Acc:4725]	6	p22.1	1	27775899	27776429	ENSG00000196747	+	887	5	860	1	21	82.51	0.56	28.429	1.06e-31	0.39336
Correlated	HIST1H2AJ	histone cluster 1, H2aj [Source:HGNC Symbol;Acc:4727]	6	p22.1	-1	27782112	27782607	ENSG00000182611	+	871	6	837	6	22	81.02	0.69	15.554	2.2e-20	0.313494
Correlated	HIST1H2AM	histone cluster 1, H2am [Source:HGNC Symbol;Acc:4735]	6	p22.1	-1	27860477	27860963	ENSG00000233224	+	917	8	879	10	20	85.3	0.87	14.556	6.46e-25	0.34041
Correlated	HIST1H2APS5	histone cluster 1, H2a, pseudogene 5						unknown	+	908	5	875	1	27	84.47	0.55	23.646	2e-26	0.353007
Correlated	HIST1H2BD	histone cluster 1, H2bd [Source:HGNC Symbol;Acc:4747]	6	p22.2	1	26158349	26171577	ENSG00000158373	+	965	13	904	29	19	89.77	1.35	9.3341	1.49e-24	0.329242
Correlated	HIST1H2BE	histone cluster 1, H2be [Source:HGNC Symbol;Acc:4753]	6	p22.2	1	26183958	26184454	ENSG00000197697	+	946	9	905	12	20	88	0.95	13.98	1.05e-26	0.347806
Correlated	HIST1H2BF	histone cluster 1, H2bf [Source:HGNC Symbol;Acc:4752]	6	p22.2	1	26199748	26200942	ENSG00000197846	+	954	8	919	4	23	88.74	0.84	20.516	1.11e-35	0.403682
Correlated	HIST1H2BH	histone cluster 1, H2bh [Source:HGNC Symbol;Acc:4755]	6	p22.2	1	26251879	26252303	ENSG00000197459	+	949	10	908	12	19	88.28	1.05	14.875	1.43e-31	0.379487
Correlated	HIST1H2BI	histone cluster 1, H2bi [Source:HGNC Symbol;Acc:4756]	6	p22.2	1	26273144	26273622	ENSG00000168242	+	932	7	894	9	22	86.7	0.75	14.06	3.61e-21	0.30933
Correlated	HIST1H3D	histone cluster 1, H3d [Source:HGNC Symbol;Acc:4767]	6	p22.2	-1	26197068	26199521	ENSG00000197409	+	946	10	896	21	19	88	1.06	10.523	9.04e-22	0.311709
Correlated	HIST1H3H	histone cluster 1, H3h [Source:HGNC Symbol;Acc:4775]	6	p22.1	1	27777842	27778314	ENSG00000203813	+	936	15	893	13	15	87.07	1.6	16.714	0	0.502143
Correlated	HIST1H4J	histone cluster 1, H4j [Source:HGNC Symbol;Acc:4785]	6	p22.1	1	27791884	27792257	ENSG00000197238	+	913	11	881	3	18	84.93	1.2	24.736	0	0.536504
Correlated	HIST2H2AA4	histone cluster 2, H2aa4 [Source:HGNC Symbol;Acc:29668]	HG1287_PATCH	q21.2	1	150537491	150538039	ENSG00000266225	+	838	13	787	22	16	77.95	1.55	10.733	8.28e-29	0.384723
Correlated	HIST2H2BA	histone cluster 2, H2ba (pseudogene) [Source:HGNC Symbol;Acc:20560]	HG1292_PATCH	p11.2	-1	121600482	121609529	ENSG00000265540	+	819	5	788	4	22	76.19	0.61	16.852	1.05e-18	0.308516
Correlated	HIST3H3	histone cluster 3, H3 [Source:HGNC Symbol;Acc:4778]	1	q42.13	-1	228612546	228613026	ENSG00000168148	+	921	4	892	1	24	85.67	0.43	26.314	9.14e-24	0.331174
Correlated	HIVEP2	human immunodeficiency virus type I enhancer binding protein 2 [Source:HGNC Symbol;Acc:4921]	6	q24.2	-1	143072604	143266338	ENSG00000010818	-	1027	12	987	5	23	95.53	1.17	20.713	0	0.480381
Correlated	HIVEP3	human immunodeficiency virus type I enhancer binding protein 3 [Source:HGNC Symbol;Acc:13561]	1	p34.2	-1	41972036	42501596	ENSG00000127124	-	1049	12	995	17	25	97.58	1.14	11.732	3.8e-29	0.345998
Correlated	HJURP	Holliday junction recognition protein [Source:HGNC Symbol;Acc:25444]	2	q37.1	-1	234742062	234763212	ENSG00000123485	+	967	12	929	8	18	89.95	1.24	19.34	0	0.476903
Correlated	HK1	hexokinase 1 [Source:HGNC Symbol;Acc:4922]	LRG_365		1	5001	136883	LRG_365	-	946	6	914	3	23	88	0.63	21.747	9.84e-29	0.361596
Correlated	HK2	hexokinase 2 [Source:HGNC Symbol;Acc:4923]	2	p12	1	75061108	75120486	ENSG00000159399	+	967	15	921	17	14	89.95	1.55	15.63	0	0.475908
Correlated	HLA-A	major histocompatibility complex, class I, A [Source:HGNC Symbol;Acc:4931]	HSCHR6_MHC_DBB	p22.1	1	29899000	29903640	ENSG00000235657	+	947	7	912	4	24	88.09	0.74	19.44	1.08e-29	0.367747
Correlated	HLA-A	major histocompatibility complex, class I, A [Source:HGNC Symbol;Acc:4931]	HSCHR6_MHC_DBB	p22.1	1	29899000	29903640	ENSG00000235657	-	947	8	910	6	23	88.09	0.84	17.456	3.64e-30	0.37084
Correlated	HLA-C	major histocompatibility complex, class I, C [Source:HGNC Symbol;Acc:4933]	HSCHR6_MHC_MANN	p22.1	-1	31280024	31283395	ENSG00000237022	-	930	7	892	7	24	86.51	0.75	15	1.11e-22	0.3214
Correlated	HLA-DOA	major histocompatibility complex, class II, DO alpha [Source:HGNC Symbol;Acc:4936]	HSCHR6_MHC_DBB	p21.32	-1	32949907	32955340	ENSG00000235744	-	1033	11	989	9	24	96.09	1.06	16.233	5.63e-38	0.40083
Correlated	HLA-DOA	major histocompatibility complex, class II, DO alpha [Source:HGNC Symbol;Acc:4936]	HSCHR6_MHC_DBB	p21.32	-1	32949907	32955340	ENSG00000235744	+	1033	9	989	9	26	96.09	0.87	14.757	2.84e-28	0.343084
Correlated	HLA-DQB1	major histocompatibility complex, class II, DQ beta 1 [Source:HGNC Symbol;Acc:4944]	HSCHR6_MHC_DBB	p21.32	-1	32602484	32612425	ENSG00000233209	-	934	13	878	26	17	86.88	1.39	10.378	1.17e-27	0.356613
Correlated	HLA-DRB4	major histocompatibility complex, class II, DR beta 4 [Source:HGNC Symbol;Acc:4952]	HSCHR6_MHC_MCF	p21.32	-1	32578924	32593887	ENSG00000231021	-	912	6	876	5	25	84.84	0.66	16.047	4.59e-21	0.311871
Correlated	HLA-E	major histocompatibility complex, class I, E [Source:HGNC Symbol;Acc:4962]	HSCHR6_MHC_MANN	p22.1	1	30501925	30506663	ENSG00000236632	-	935	9	898	8	20	86.98	0.96	17.069	5.57e-33	0.391224
Correlated	HLA-E	major histocompatibility complex, class I, E [Source:HGNC Symbol;Acc:4962]	HSCHR6_MHC_MANN	p22.1	1	30501925	30506663	ENSG00000236632	+	935	7	898	8	22	86.98	0.75	15.046	1e-22	0.320877
Correlated	HLA-F	major histocompatibility complex, class I, F [Source:HGNC Symbol;Acc:4963]	HSCHR6_MHC_MANN	p22.1	1	29687660	29703415	ENSG00000237508	-	954	6	919	5	24	88.74	0.63	17.345	8.78e-23	0.318099
Correlated	HLA-G	major histocompatibility complex, class I, G [Source:HGNC Symbol;Acc:4964]	HSCHR6_MHC_MCF	p22.1	1	29791626	29795784	ENSG00000237216	-	925	8	888	6	23	86.05	0.86	17.051	1.87e-29	0.370519
Correlated	HLA-J	major histocompatibility complex, class I, J (pseudogene) [Source:HGNC Symbol;Acc:4967]	HSCHR6_MHC_QBL	p22.1	1	29963880	29967239	ENSG00000243336	-	880	5	849	2	24	81.86	0.57	21.675	3.74e-24	0.341758
Correlated	HLF	hepatic leukemia factor [Source:HGNC Symbol;Acc:4977]	17	q22	1	53342373	53402426	ENSG00000108924	-	945	16	893	21	15	87.91	1.69	13.182	4.62e-44	0.452889
Correlated	HMCN1	hemicentin 1 [Source:HGNC Symbol;Acc:19194]	1	q25.3	1	185703683	186160085	ENSG00000143341	+	991	11	948	7	25	92.19	1.11	16.823	1.62e-39	0.417836
Correlated	HMCN2	hemicentin 2 [Source:HGNC Symbol;Acc:21293]	HG1502_PATCH	q34.11	1	133046882	133340606	ENSG00000269324	-	979	5	942	2	30	91.07	0.51	19.98	2.9e-22	0.310135
Correlated	HMG20B	high mobility group 20B [Source:HGNC Symbol;Acc:5002]	19	p13.3	1	3572775	3579086	ENSG00000064961	-	953	6	918	4	25	88.65	0.63	18.445	2.73e-24	0.329408
Correlated	HMG20B	high mobility group 20B [Source:HGNC Symbol;Acc:5002]	19	p13.3	1	3572775	3579086	ENSG00000064961	+	953	7	920	2	24	88.65	0.73	23.91	9.51e-37	0.410188
Correlated	HMGB2	high mobility group box 2 [Source:HGNC Symbol;Acc:5000]	4	q34.1	-1	174252846	174256276	ENSG00000164104	+	1037	9	991	9	28	96.47	0.87	14.014	8.79e-27	0.332694
Correlated	HMGB3	high mobility group box 3 [Source:HGNC Symbol;Acc:5004]	HG1459_PATCH	q28	1	150062231	150072497	ENSG00000269411	+	1069	9	1021	11	28	99.44	0.84	13.001	1.08e-24	0.313775
Correlated	HMGB3P1	high mobility group box 3 pseudogene 1 [Source:HGNC Symbol;Acc:16240]	20	q11.22	-1	33421378	33422265	ENSG00000225336	+	867	6	833	5	23	80.65	0.69	16.307	2e-21	0.322799
Correlated	HMGCLL1	3-hydroxymethyl-3-methylglutaryl-CoA lyase-like 1 [Source:HGNC Symbol;Acc:21359]	6	p12.1	-1	55299167	55444012	ENSG00000146151	-	1023	10	974	14	25	95.16	0.98	12.179	1.8e-25	0.32611
Correlated	HMGCR	3-hydroxy-3-methylglutaryl-CoA reductase [Source:HGNC Symbol;Acc:5006]	5	q13.3	1	74632154	74657929	ENSG00000113161	+	975	8	936	8	23	90.7	0.82	15.726	5.16e-27	0.344687
Correlated	HMGN1	high mobility group nucleosome binding domain 1 [Source:HGNC Symbol;Acc:4984]	21	q22.2	-1	40714241	40721573	ENSG00000205581	+	952	7	918	2	25	88.56	0.74	23.139	1.48e-35	0.403369
Correlated	HMMR	hyaluronan-mediated motility receptor (RHAMM) [Source:HGNC Symbol;Acc:5012]	5	q34	1	162887175	162918947	ENSG00000072571	+	940	16	896	15	13	87.44	1.7	16.73	0	0.518274
Correlated	HMX1	H6 family homeobox 1 [Source:HGNC Symbol;Acc:5017]	4	p16.1	-1	8847802	8873543	ENSG00000215612	+	925	5	894	3	23	86.05	0.54	20.647	6.15e-23	0.324225
Correlated	HN1	hematological and neurological expressed 1 [Source:HGNC Symbol;Acc:14569]	17	q25.1	-1	73131343	73164376	ENSG00000189159	+	1062	8	1016	9	29	98.79	0.75	13.507	5.24e-23	0.303085
Correlated	HNF4G	hepatocyte nuclear factor 4, gamma [Source:HGNC Symbol;Acc:5026]	8	q21.11	1	76320149	76479078	ENSG00000164749	+	1043	11	997	10	25	97.02	1.05	15.176	2.35e-35	0.384213
Correlated	HNMT	histamine N-methyltransferase [Source:HGNC Symbol;Acc:5028]	2	q22.1	1	138721590	138773930	ENSG00000150540	+	1053	12	994	22	25	97.95	1.14	10.045	1.44e-24	0.315277
Correlated	HNRNPAB	heterogeneous nuclear ribonucleoprotein A/B [Source:HGNC Symbol;Acc:5034]	5	q35.3	1	177631508	177638164	ENSG00000197451	+	1051	7	1012	1	31	97.77	0.67	24.201	2.8e-37	0.393541
Correlated	HNRNPF	heterogeneous nuclear ribonucleoprotein F [Source:HGNC Symbol;Acc:5039]	10	q11.21	-1	43881065	43904614	ENSG00000169813	+	970	4	940	1	25	90.23	0.41	26.759	3.76e-24	0.325498
Correlated	HOGA1	4-hydroxy-2-oxoglutarate aldolase 1 [Source:HGNC Symbol;Acc:25155]	10	q24.2	1	99344080	99372559	ENSG00000241935	-	1037	8	997	3	29	96.47	0.77	20.383	1.75e-35	0.386057
Correlated	HOMER1	homer homolog 1 (Drosophila) [Source:HGNC Symbol;Acc:17512]	5	q14.1	-1	78668459	78810040	ENSG00000152413	-	1066	13	1021	7	25	99.16	1.22	18.234	0	0.45818
Correlated	HOMER2	homer homolog 2 (Drosophila) [Source:HGNC Symbol;Acc:17513]	15	q25.2	-1	83509838	83654661	ENSG00000103942	+	942	8	906	5	23	87.63	0.85	18.7	2.04e-32	0.386236
Correlated	HOMER2	homer homolog 2 (Drosophila) [Source:HGNC Symbol;Acc:17513]	15	q25.2	-1	83509838	83654661	ENSG00000103942	-	942	9	900	11	22	87.63	0.96	13.674	4.17e-26	0.344343
Correlated	HOOK2	hook homolog 2 (Drosophila) [Source:HGNC Symbol;Acc:19885]	19	p13.2	-1	12873817	12983554	ENSG00000095066	-	961	7	927	5	22	89.4	0.73	19.33	1.81e-29	0.363598
Correlated	HOTAIRM1	HOXA transcript antisense RNA, myeloid-specific 1 [Source:HGNC Symbol;Acc:37117]	7	p15.2	1	27135266	27139884	ENSG00000233429	-	1026	7	986	3	30	95.44	0.68	19.411	1.09e-29	0.353288
Correlated	HOTAIRM1	HOXA transcript antisense RNA, myeloid-specific 1 [Source:HGNC Symbol;Acc:37117]	7	p15.2	1	27135266	27139884	ENSG00000233429	+	1026	11	978	11	26	95.44	1.07	13.865	3.97e-32	0.368343
Correlated	HOTTIP	HOXA distal transcript antisense RNA [Source:HGNC Symbol;Acc:37461]	7	p15.2	1	27238194	27246878	ENSG00000243766	-	895	4	864	1	26	83.26	0.45	23.867	1.31e-21	0.319187
Correlated	HOXA10	homeobox A10 [Source:HGNC Symbol;Acc:5100]	7	p15.2	-1	27210210	27219880	ENSG00000253293	+	960	7	927	5	21	89.3	0.73	20	1.66e-30	0.37052
Correlated	HOXA11	homeobox A11 [Source:HGNC Symbol;Acc:5101]	7	p15.2	-1	27221129	27224842	ENSG00000005073	+	950	5	919	3	23	88.37	0.53	21.205	1.5e-23	0.324489
Correlated	HOXA3	homeobox A3 [Source:HGNC Symbol;Acc:5104]	7	p15.2	-1	27145803	27192200	ENSG00000105997	+	1009	9	967	4	29	93.86	0.89	18.383	9.7e-36	0.392861
Correlated	HOXA4	homeobox A4 [Source:HGNC Symbol;Acc:5105]	7	p15.2	-1	27168126	27170418	ENSG00000197576	-	944	7	909	5	23	87.81	0.74	18.356	5.81e-28	0.356787
Correlated	HOXA7	homeobox A7 [Source:HGNC Symbol;Acc:5108]	7	p15.2	-1	27193335	27197555	ENSG00000122592	-	1054	13	1006	12	23	98.05	1.23	15.224	9.57e-42	0.416941
Correlated	HOXA7	homeobox A7 [Source:HGNC Symbol;Acc:5108]	7	p15.2	-1	27193335	27197555	ENSG00000122592	+	1054	6	1014	4	30	98.05	0.57	17.567	4.21e-23	0.304903
Correlated	HOXA9	homeobox A9 [Source:HGNC Symbol;Acc:5109]	7	p15.2	-1	27202054	27210117	ENSG00000078399	+	901	6	870	3	22	83.81	0.67	21.452	2.35e-28	0.367921
Correlated	HOXB2	homeobox B2 [Source:HGNC Symbol;Acc:5113]	17	q21.32	-1	46618256	46623441	ENSG00000173917	+	934	9	897	9	19	86.88	0.96	16.679	3.54e-32	0.386376
Correlated	HOXB6	homeobox B6 [Source:HGNC Symbol;Acc:5117]	17	q21.32	-1	46671639	46682354	ENSG00000108511	+	934	7	898	7	22	86.88	0.75	16.103	2.13e-24	0.333519
Correlated	HOXB7	homeobox B7 [Source:HGNC Symbol;Acc:5118]	17	q21.32	-1	46684594	46724385	ENSG00000260027	+	950	7	911	8	24	88.37	0.74	14.301	1.47e-21	0.309421
Correlated	HOXC10	homeobox C10 [Source:HGNC Symbol;Acc:5122]	12	q13.13	1	54378849	54384063	ENSG00000180818	+	959	9	926	4	20	89.21	0.94	22.894	9.81e-45	0.453218
Correlated	HOXD3	homeobox D3 [Source:HGNC Symbol;Acc:5137]	2	q31.1	1	177001340	177037830	ENSG00000128652	-	936	4	908	0	24	87.07	0.43	33.429	3.57e-30	0.373066
Correlated	HOXD4	homeobox D4 [Source:HGNC Symbol;Acc:5138]	2	q31.1	1	177015950	177017954	ENSG00000170166	+	906	5	873	3	25	84.28	0.55	18.875	5.57e-21	0.312221
Correlated	HOXD8	homeobox D8 [Source:HGNC Symbol;Acc:5139]	2	q31.1	1	176994422	176997423	ENSG00000175879	-	1034	8	993	6	27	96.19	0.77	16.882	4.13e-29	0.348265
Correlated	HPCA	hippocalcin [Source:HGNC Symbol;Acc:5144]	1	p35.1	1	33351595	33364042	ENSG00000121905	-	954	6	920	3	25	88.74	0.63	20.516	4.24e-27	0.349043
Correlated	HPCAL1	hippocalcin-like 1 [Source:HGNC Symbol;Acc:5145]	2	p25.1	1	10443015	10567743	ENSG00000115756	-	976	10	938	7	21	90.79	1.02	18.52	8.9e-40	0.422486
Correlated	HPCAL4	hippocalcin like 4 [Source:HGNC Symbol;Acc:18212]	1	p34.2	-1	40144320	40157361	ENSG00000116983	-	939	8	908	2	21	87.35	0.85	25.903	2.8e-45	0.461243
Correlated	HPGDS	hematopoietic prostaglandin D synthase [Source:HGNC Symbol;Acc:17890]	4	q22.3	-1	95219686	95264027	ENSG00000163106	-	937	7	906	2	22	87.16	0.75	25.13	1.23e-38	0.424684
Correlated	HPRT1	hypoxanthine phosphoribosyltransferase 1 [Source:HGNC Symbol;Acc:5157]	X	q26.2	1	133594183	133654543	ENSG00000165704	-	942	7	906	7	22	87.63	0.74	16.241	1.31e-24	0.33364
Correlated	HPS4	Hermansky-Pudlak syndrome 4 [Source:HGNC Symbol;Acc:15844]	22	q12.1	-1	26839389	26879803	ENSG00000100099	+	963	4	932	0	27	89.58	0.42	31.065	4.31e-28	0.354118
Correlated	HPSE	heparanase [Source:HGNC Symbol;Acc:5164]	4	q21.23	-1	84213614	84256306	ENSG00000173083	+	1061	12	1009	17	23	98.7	1.13	12.544	2.52e-31	0.357413
Correlated	HRASLS5	HRAS-like suppressor family, member 5 [Source:HGNC Symbol;Acc:24978]	11	q12.3	-1	63228876	63258666	ENSG00000168004	-	1016	10	976	4	26	94.51	0.98	20.159	1.57e-43	0.434045
Correlated	HRH3	histamine receptor H3 [Source:HGNC Symbol;Acc:5184]	20	q13.33	-1	60790026	60795323	ENSG00000101180	-	947	7	918	0	22	88.09	0.74	32.655	0	0.48552
Correlated	HRK	harakiri, BCL2 interacting protein (contains only BH3 domain) [Source:HGNC Symbol;Acc:5185]	12	q24.22	-1	117293949	117319246	ENSG00000135116	-	947	6	916	2	23	88.09	0.63	24.491	1.92e-32	0.385388
Correlated	HS2ST1	heparan sulfate 2-O-sulfotransferase 1 [Source:HGNC Symbol;Acc:5193]	1	p22.3	1	87380331	87602334	ENSG00000153936	-	1074	9	1024	12	29	99.91	0.84	12.113	6.86e-23	0.300559
Correlated	HS3ST1	heparan sulfate (glucosamine) 3-O-sulfotransferase 1 [Source:HGNC Symbol;Acc:5194]	4	p15.33	-1	11394774	11431389	ENSG00000002587	+	957	14	917	9	17	89.02	1.46	18.791	0	0.510819
Correlated	HS3ST2	heparan sulfate (glucosamine) 3-O-sulfotransferase 2 [Source:HGNC Symbol;Acc:5195]	16	p12.2	1	22825498	22927659	ENSG00000122254	-	953	10	920	4	19	88.65	1.05	23.473	0	0.486131
Correlated	HS3ST5	heparan sulfate (glucosamine) 3-O-sulfotransferase 5 [Source:HGNC Symbol;Acc:19419]	6	q22.1	-1	114376750	114664209	ENSG00000249853	-	1021	5	984	2	30	94.98	0.49	20.837	3.33e-23	0.310524
Correlated	HS6ST3	heparan sulfate 6-O-sulfotransferase 3 [Source:HGNC Symbol;Acc:19134]	13	q32.1	1	96743093	97485671	ENSG00000185352	-	1036	10	988	10	28	96.37	0.97	13.632	8.87e-29	0.345822
Correlated	HSBP1L1	heat shock factor binding protein 1-like 1 [Source:HGNC Symbol;Acc:37243]	18	q23	1	77724561	77730822	ENSG00000226742	+	1003	6	965	3	29	93.3	0.6	19.105	3.24e-25	0.32758
Correlated	HSCB	HscB iron-sulfur cluster co-chaperone homolog (E. coli) [Source:HGNC Symbol;Acc:28913]	22	q12.1	1	29138019	29153503	ENSG00000100209	-	1031	4	995	0	32	95.91	0.39	28.639	5.96e-26	0.328099
Correlated	HSD17B10	hydroxysteroid (17-beta) dehydrogenase 10 [Source:HGNC Symbol;Acc:4800]	LRG_450		1	5001	8118	LRG_450	+	950	5	919	2	24	88.37	0.53	23.399	4.82e-26	0.342445
Correlated	HSD17B6	hydroxysteroid (17-beta) dehydrogenase 6 [Source:HGNC Symbol;Acc:23316]	12	q13.3	1	57145945	57181574	ENSG00000025423	-	962	8	922	11	21	89.49	0.83	13.967	7.88e-24	0.324511
Correlated	HSD17B8	hydroxysteroid (17-beta) dehydrogenase 8 [Source:HGNC Symbol;Acc:3554]	HSCHR6_MHC_MCF	p21.32	1	33342783	33344972	ENSG00000232357	+	947	3	918	0	26	88.09	0.32	32.655	1.66e-22	0.317174
Correlated	HSPA12A	heat shock 70kDa protein 12A [Source:HGNC Symbol;Acc:19022]	HG311_PATCH	q25.3	-1	118430705	118502086	ENSG00000263052	-	944	14	907	7	16	87.81	1.48	20.978	0	0.545938
Correlated	HSPA12B	heat shock 70kD protein 12B [Source:HGNC Symbol;Acc:16193]	20	p13	1	3713314	3733758	ENSG00000132622	-	1034	6	993	4	31	96.19	0.58	16.768	4.81e-22	0.30017
Correlated	HSPA1L	heat shock 70kDa protein 1-like [Source:HGNC Symbol;Acc:5234]	HSCHR6_MHC_COX	p21.33	-1	31764773	31770218	ENSG00000236251	-	1059	6	1020	4	29	98.51	0.57	18.154	7.01e-24	0.309648
Correlated	HSPA2	heat shock 70kDa protein 2 [Source:HGNC Symbol;Acc:5235]	14	q23.3	1	65002623	65009955	ENSG00000126803	-	955	9	914	12	20	88.84	0.94	14.113	5.72e-27	0.34797
Correlated	HSPB2	heat shock 27kDa protein 2 [UniGene: NA]						unknown	-	963	6	929	4	24	89.58	0.62	19.26	2.27e-25	0.335409
Correlated	HSPB6	heat shock protein, alpha-crystallin-related, B6 [Source:HGNC Symbol;Acc:26511]	19	q13.12	-1	36245469	36248980	ENSG00000004776	-	1059	9	1014	8	28	98.51	0.85	15.153	4.41e-29	0.343956
Correlated	HTATIP2	HIV-1 Tat interactive protein 2, 30kDa [Source:HGNC Symbol;Acc:16637]	11	p15.1	1	20385231	20405329	ENSG00000109854	-	1062	7	1021	6	28	98.79	0.66	16.338	9.37e-25	0.315221
Correlated	HTR1F	5-hydroxytryptamine (serotonin) receptor 1F, G protein-coupled [Source:HGNC Symbol;Acc:5292]	3	p11.1	1	88039846	88042919	ENSG00000179097	-	935	3	906	0	26	86.98	0.32	32.241	3.11e-22	0.317116
Correlated	HTR2A	5-hydroxytryptamine (serotonin) receptor 2A, G protein-coupled [Source:HGNC Symbol;Acc:5293]	13	q14.2	-1	47405685	47471169	ENSG00000102468	-	1040	8	1001	2	29	96.74	0.77	22.486	2.76e-39	0.406628
Correlated	HTR2C	5-hydroxytryptamine (serotonin) receptor 2C, G protein-coupled [Source:HGNC Symbol;Acc:5295]	HG1462_PATCH	q23	1	113820548	114146531	ENSG00000269075	-	933	8	899	3	23	86.79	0.86	21.889	3.48e-38	0.422977
Correlated	HTR5A	5-hydroxytryptamine (serotonin) receptor 5A, G protein-coupled [Source:HGNC Symbol;Acc:5300]	7	q36.2	1	154862034	154877459	ENSG00000157219	-	904	7	875	1	21	84.09	0.77	28.25	1.44e-43	0.460346
Correlated	HTRA3	HtrA serine peptidase 3 [Source:HGNC Symbol;Acc:30406]	4	p16.1	1	8271492	8308838	ENSG00000170801	-	1050	5	1014	1	30	97.67	0.48	25	6.8e-28	0.337861
Correlated	HUNK	hormonally up-regulated Neu-associated kinase [Source:HGNC Symbol;Acc:13326]	21	q22.11	1	33245628	33416946	ENSG00000142149	-	943	5	909	2	27	87.72	0.53	21.049	1.89e-23	0.324954
Correlated	HYAL1	hyaluronoglucosaminidase 1 [Source:HGNC Symbol;Acc:5320]	HG325_PATCH	p21.31	-1	50337321	50349813	ENSG00000262208	+	952	8	916	5	23	88.56	0.84	18.898	9.18e-33	0.386368
Correlated	IAPP	islet amyloid polypeptide [Source:HGNC Symbol;Acc:5329]	12	p12.1	1	21507893	21532912	ENSG00000121351	-	907	5	876	3	23	84.37	0.55	20.246	1.7e-22	0.324026
Correlated	ICAM1	intercellular adhesion molecule 1 [Source:HGNC Symbol;Acc:5344]	19	p13.2	1	10381511	10397291	ENSG00000090339	-	942	12	899	12	19	87.63	1.27	15.194	1.33e-38	0.423347
Correlated	ICAM3	intercellular adhesion molecule 3 [Source:HGNC Symbol;Acc:5346]	19	p13.2	-1	10444452	10450499	ENSG00000076662	-	948	9	914	5	20	88.19	0.95	21.015	5.84e-41	0.435294
Correlated	ICAM5	intercellular adhesion molecule 5, telencephalin [Source:HGNC Symbol;Acc:5348]	19	p13.2	1	10400657	10407454	ENSG00000105376	-	939	6	906	3	24	87.35	0.64	20.867	1.44e-27	0.355045
Correlated	ICOSLG	inducible T-cell co-stimulator ligand [Source:HGNC Symbol;Acc:17087]	21	q22.3	-1	45642874	45660849	ENSG00000160223	-	1046	12	1000	10	24	97.3	1.15	15.848	2.67e-40	0.410898
Correlated	ID1	inhibitor of DNA binding 1, dominant negative helix-loop-helix protein [Source:HGNC Symbol;Acc:5360]	20	q11.21	1	30193086	30194318	ENSG00000125968	+	961	12	915	17	17	89.4	1.25	13.712	1.45e-34	0.395553
Correlated	ID3	inhibitor of DNA binding 3, dominant negative helix-loop-helix protein [Source:HGNC Symbol;Acc:5362]	1	p36.12	-1	23884409	23886285	ENSG00000117318	+	971	10	926	14	21	90.33	1.03	13.051	1.86e-27	0.348396
Correlated	IDH1	isocitrate dehydrogenase 1 (NADP+), soluble [Source:HGNC Symbol;Acc:5382]	2	q34	-1	209100951	209130798	ENSG00000138413	+	1041	11	993	10	27	96.84	1.06	14.35	2.49e-33	0.372838
Correlated	IDH3A	isocitrate dehydrogenase 3 (NAD+) alpha [Source:HGNC Symbol;Acc:5384]	15	q25.1	1	78423840	78464291	ENSG00000166411	-	1068	10	1023	9	26	99.35	0.94	15.614	3.35e-33	0.367342
Correlated	IDS	iduronate 2-sulfatase [Source:HGNC Symbol;Acc:5389]	HG1459_PATCH	q28	-1	148558712	148615657	ENSG00000267816	-	1064	16	1011	15	22	98.98	1.5	14.452	0	0.448459
Correlated	IFFO1	intermediate filament family orphan 1 [Source:HGNC Symbol;Acc:24970]	12	p13.31	-1	6647541	6665239	ENSG00000010295	-	858	7	823	6	22	79.81	0.82	15.931	3.45e-24	0.346382
Correlated	IFI30	interferon, gamma-inducible protein 30 [Source:HGNC Symbol;Acc:5398]	19	p13.11	1	18283972	18288927	ENSG00000216490	+	948	8	909	10	21	88.19	0.84	14.529	7.48e-25	0.334344
Correlated	IFNAR2	interferon (alpha, beta and omega) receptor 2 [Source:HGNC Symbol;Acc:5433]	21	q22.11	1	34602206	34637980	ENSG00000159110	-	1044	9	1002	5	28	97.12	0.86	18.139	3.54e-35	0.383016
Correlated	IFRD1	interferon-related developmental regulator 1 [Source:HGNC Symbol;Acc:5456]	7	q31.1	1	112063023	112121072	ENSG00000006652	-	1074	5	1035	2	32	99.91	0.47	20.734	4.41e-23	0.301915
Correlated	IFT46	intraflagellar transport 46 homolog (Chlamydomonas) [Source:HGNC Symbol;Acc:26146]	HG122_PATCH	q23.3	-1	118415243	118443685	ENSG00000269278	-	971	5	938	3	25	90.33	0.51	20.229	1.82e-22	0.312938
Correlated	IFT57	intraflagellar transport 57 homolog (Chlamydomonas) [Source:HGNC Symbol;Acc:17367]	3	q13.13	-1	107879659	107941417	ENSG00000114446	-	1063	11	1018	9	25	98.88	1.03	16.24	5.65e-38	0.395122
Correlated	IGF1	insulin-like growth factor 1 (somatomedin C) [Source:HGNC Symbol;Acc:5464]	12	q23.2	-1	102789645	102874423	ENSG00000017427	-	1041	10	994	12	25	96.84	0.96	13.519	1.74e-28	0.34312
Correlated	IGFBP6	insulin-like growth factor binding protein 6 [Source:HGNC Symbol;Acc:5475]	12	q13.13	1	53491220	53496129	ENSG00000167779	-	929	10	879	21	19	86.42	1.08	10.334	2.35e-21	0.311297
Correlated	IGFBP7	insulin-like growth factor binding protein 7 [Source:HGNC Symbol;Acc:5476]	4	q12	-1	57896939	57976551	ENSG00000163453	+	948	10	899	20	19	88.19	1.05	10.897	1.3e-22	0.317808
Correlated	IGFBP7	insulin-like growth factor binding protein 7 [Source:HGNC Symbol;Acc:5476]	4	q12	-1	57896939	57976551	ENSG00000163453	-	948	10	903	16	19	88.19	1.05	12.573	2.17e-26	0.345228
Correlated	IGHM	immunoglobulin heavy constant mu [Source:HGNC Symbol;Acc:5541]	HG1592_PATCH	q32.33	-1	106320581	106322555	ENSG00000271541	-	889	10	850	10	19	82.7	1.12	15.328	1.17e-32	0.399142
Correlated	IGJ	immunoglobulin J polypeptide, linker protein for immunoglobulin alpha and mu polypeptides [Source:HGNC Symbol;Acc:5713]	4	q13.3	-1	71521258	71547534	ENSG00000132465	-	912	6	878	5	23	84.84	0.66	17.154	1.54e-22	0.323461
Correlated	IGLC6	immunoglobulin lambda constant 6 (Kern+Oz- marker, gene/pseudogene) [Source:HGNC Symbol;Acc:5860]	22	q11.22	1	23261707	23262023	ENSG00000222037	-	819	7	788	4	20	76.19	0.85	19.303	1.57e-29	0.394306
Correlated	IGLV1-44	immunoglobulin lambda variable 1-44 [Source:HGNC Symbol;Acc:5879]	22	q11.22	1	22735135	22735715	ENSG00000211651	-	972	7	932	5	28	90.42	0.72	16.2	1.31e-24	0.328445
Correlated	IGLV3-19	immunoglobulin lambda variable 3-19 [Source:HGNC Symbol;Acc:5903]	22	q11.22	1	23063108	23063630	ENSG00000211663	+	822	4	794	2	22	76.47	0.49	21.077	4.64e-19	0.311141
Correlated	IGSF10	immunoglobulin superfamily, member 10 [Source:HGNC Symbol;Acc:26384]	3	q25.1	-1	151143172	151176497	ENSG00000152580	-	1025	15	985	5	20	95.35	1.46	21.964	0	0.556069
Correlated	IGSF11	immunoglobulin superfamily, member 11 [Source:HGNC Symbol;Acc:16669]	3	q13.32	-1	118619404	118864915	ENSG00000144847	-	1003	9	963	2	29	93.3	0.9	21.596	2.66e-42	0.430373
Correlated	IGSF3	immunoglobulin superfamily, member 3 [Source:HGNC Symbol;Acc:5950]	1	p13.1	-1	117117031	117210375	ENSG00000143061	+	966	13	921	14	18	89.86	1.35	15.004	3.59e-41	0.432378
Correlated	IGSF5	immunoglobulin superfamily, member 5 [Source:HGNC Symbol;Acc:5952]	21	q22.2	1	41117334	41174023	ENSG00000183067	+	984	6	947	2	29	91.53	0.61	21.086	6.3e-28	0.349227
Correlated	IGSF8	immunoglobulin superfamily, member 8 [Source:HGNC Symbol;Acc:17813]	1	q23.2	-1	160061130	160068733	ENSG00000162729	-	1042	11	1002	3	26	96.93	1.06	22.127	0	0.473077
Correlated	IKBIP	IKBKB interacting protein [Source:HGNC Symbol;Acc:26430]	12	q23.1	-1	99007183	99038891	ENSG00000166130	+	1034	11	986	12	25	96.19	1.06	13.737	8.68e-32	0.364865
Correlated	IKBKB	inhibitor of kappa light polypeptide gene enhancer in B-cells, kinase beta [Source:HGNC Symbol;Acc:5960]	8	p11.21	1	42128820	42189973	ENSG00000104365	-	965	9	929	5	22	89.77	0.93	20.012	5.99e-39	0.420241
Correlated	IKBKB	inhibitor of kappa light polypeptide gene enhancer in B-cells, kinase beta [Source:HGNC Symbol;Acc:5960]	8	p11.21	1	42128820	42189973	ENSG00000104365	+	965	7	928	6	24	89.77	0.73	16.762	1.93e-25	0.335557
Correlated	IKZF2	IKAROS family zinc finger 2 (Helios) [Source:HGNC Symbol;Acc:13177]	2	q34	-1	213864429	214017151	ENSG00000030419	+	1028	11	980	12	25	95.63	1.07	13.657	1.35e-31	0.36476
Correlated	IL10RA	interleukin 10 receptor, alpha [Source:HGNC Symbol;Acc:5964]	LRG_151		1	5001	20093	LRG_151	-	937	6	902	6	23	87.16	0.64	16.155	3.63e-21	0.308487
Correlated	IL12RB1	interleukin 12 receptor, beta 1 [Source:HGNC Symbol;Acc:5971]	19	p13.11	-1	18169805	18209759	ENSG00000096996	+	1045	6	1007	3	29	97.21	0.57	19.905	2.87e-26	0.328009
Correlated	IL12RB2	interleukin 12 receptor, beta 2 [Source:HGNC Symbol;Acc:5972]	1	p31.3	1	67773047	67862583	ENSG00000081985	-	906	6	872	4	24	84.28	0.66	18.12	7.16e-24	0.334702
Correlated	IL18RAP	interleukin 18 receptor accessory protein [Source:HGNC Symbol;Acc:5989]	2	q12.1	1	103035149	103069025	ENSG00000115607	-	943	5	914	1	23	87.72	0.53	28.065	2.75e-31	0.37887
Correlated	IL1RAPL1	interleukin 1 receptor accessory protein-like 1 [Source:HGNC Symbol;Acc:5996]	X	p21.3	1	28605516	29974840	ENSG00000169306	-	1032	8	995	2	27	96	0.78	23.589	3.12e-41	0.418649
Correlated	IL1RL1	interleukin 1 receptor-like 1 [Source:HGNC Symbol;Acc:5998]	2	q12.1	1	102927962	102968497	ENSG00000115602	-	1038	9	989	13	27	96.56	0.87	11.795	2.98e-22	0.301108
Correlated	IL23A	interleukin 23, alpha subunit p19 [Source:HGNC Symbol;Acc:15488]	12	q13.3	1	56732663	56734193	ENSG00000110944	-	966	5	931	3	27	89.86	0.52	18.867	5.83e-21	0.302218
Correlated	IL27RA	interleukin 27 receptor, alpha [Source:HGNC Symbol;Acc:17290]	19	p13.12	1	14142560	14163743	ENSG00000104998	-	951	9	909	13	20	88.47	0.95	13.415	1.48e-25	0.338841
Correlated	IL2RG	interleukin 2 receptor, gamma [Source:HGNC Symbol;Acc:6010]	LRG_150		1	4923	9150	LRG_150	-	938	5	908	1	24	87.26	0.53	26.954	4.6e-30	0.371954
Correlated	IL32	interleukin 32 [Source:HGNC Symbol;Acc:16830]	16	p13.3	1	3115298	3131908	ENSG00000008517	-	942	9	907	5	21	87.63	0.96	20.186	2.61e-39	0.427397
Correlated	IL34	interleukin 34 [Source:HGNC Symbol;Acc:28529]	16	q22.1	1	70613798	70694585	ENSG00000157368	-	1008	5	971	1	31	93.77	0.5	23.333	4.59e-26	0.332593
Correlated	IL3RA	interleukin 3 receptor, alpha (low affinity) [Source:HGNC Symbol;Acc:6012]	X	p22.33	1	1455509	1501578	ENSG00000185291	-	931	9	900	1	21	86.6	0.97	27.93	0	0.512041
Correlated	IL4R	interleukin 4 receptor [Source:HGNC Symbol;Acc:6015]	16	p12.1	1	27324989	27376099	ENSG00000077238	-	1047	7	1008	4	28	97.4	0.67	19.036	4.9e-29	0.345628
Correlated	IL6ST	interleukin 6 signal transducer (gp130, oncostatin M receptor) [Source:HGNC Symbol;Acc:6021]	5	q11.2	-1	55230923	55290821	ENSG00000134352	+	1070	13	1011	22	24	99.53	1.21	10.741	1.41e-28	0.339025
Correlated	IL7	interleukin 7 [Source:HGNC Symbol;Acc:6023]	8	q21.12	-1	79587978	79717758	ENSG00000104432	+	930	11	890	9	20	86.51	1.18	16.5	1.04e-38	0.426704
Correlated	ILF3	interleukin enhancer binding factor 3, 90kDa [Source:HGNC Symbol;Acc:6038]	19	p13.2	1	10764937	10803093	ENSG00000129351	+	977	7	940	6	24	90.88	0.72	16.97	9.24e-26	0.335722
Correlated	IMMP2L	IMP2 inner mitochondrial membrane peptidase-like (S. cerevisiae) [Source:HGNC Symbol;Acc:14598]	7	q31.1	-1	110303110	111202573	ENSG00000184903	+	1045	6	1007	3	29	97.21	0.57	19.905	2.87e-26	0.328009
Correlated	IMP3	IMP3, U3 small nucleolar ribonucleoprotein, homolog (yeast) [Source:HGNC Symbol;Acc:14497]	15	q24.2	-1	75931426	75941047	ENSG00000177971	+	965	3	933	0	29	89.77	0.31	30.156	7.46e-21	0.301536
Correlated	IMPDH2	IMP (inosine 5'-monophosphate) dehydrogenase 2 [Source:HGNC Symbol;Acc:6053]	3	p21.31	-1	49061758	49066841	ENSG00000178035	+	1049	5	1012	2	30	97.58	0.48	21.408	7.87e-24	0.310766
Correlated	IMPG1	interphotoreceptor matrix proteoglycan 1 [Source:HGNC Symbol;Acc:6055]	6	q14.1	-1	76630832	76782395	ENSG00000112706	-	908	6	877	3	22	84.47	0.66	21.619	1.42e-28	0.368
Correlated	INA	internexin neuronal intermediate filament protein, alpha [Source:HGNC Symbol;Acc:6057]	10	q24.33	1	105036920	105050108	ENSG00000148798	-	944	9	913	2	20	87.81	0.95	26.633	0	0.495504
Correlated	INADL	InaD-like (Drosophila) [Source:HGNC Symbol;Acc:28881]	1	p31.3	1	62208149	62629592	ENSG00000132849	+	1041	9	995	8	29	96.84	0.86	14.503	8.63e-28	0.338649
Correlated	INO80D	INO80 complex subunit D [Source:HGNC Symbol;Acc:25997]	2	q33.3	-1	206858445	206951027	ENSG00000114933	+	1047	10	1004	7	26	97.4	0.96	17.108	1.35e-36	0.390498
Correlated	INPP1	inositol polyphosphate-1-phosphatase [Source:HGNC Symbol;Acc:6071]	2	q32.2	1	191208196	191236391	ENSG00000151689	-	962	7	928	5	22	89.49	0.73	19.351	1.69e-29	0.363611
Correlated	INPP5D	inositol polyphosphate-5-phosphatase, 145kDa [Source:HGNC Symbol;Acc:6079]	2	q37.1	1	233924677	234116549	ENSG00000168918	+	1043	8	1000	5	30	97.02	0.77	16.891	3.6e-29	0.34714
Correlated	INPP5F	inositol polyphosphate-5-phosphatase F [Source:HGNC Symbol;Acc:17054]	10	q26.11	1	121485609	121588652	ENSG00000198825	-	1067	8	1025	5	29	99.26	0.75	17.746	1.12e-30	0.352496
Correlated	INPP5J	inositol polyphosphate-5-phosphatase J [Source:HGNC Symbol;Acc:8956]	22	q12.2	1	31518717	31530682	ENSG00000185133	-	884	8	852	3	21	82.23	0.9	22.169	1.05e-38	0.437634
Correlated	INSM2	insulinoma-associated 2 [Source:HGNC Symbol;Acc:17539]	14	q13.2	1	36003248	36006260	ENSG00000168348	-	1007	5	972	0	30	93.67	0.5	28.771	3.34e-32	0.372263
Correlated	INTS10	integrator complex subunit 10 [Source:HGNC Symbol;Acc:25548]	8	p21.3	1	19674651	19709594	ENSG00000104613	+	1066	7	1023	6	30	99.16	0.66	15.514	1.79e-23	0.30579
Correlated	INVS	inversin [Source:HGNC Symbol;Acc:17870]	9	q31.1	1	102861538	103063282	ENSG00000119509	-	962	5	930	3	24	89.49	0.52	20.733	5.03e-23	0.318579
Correlated	IPCEF1	interaction protein for cytohesin exchange factors 1 [Source:HGNC Symbol;Acc:21204]	6	q25.2	-1	154475631	154677926	ENSG00000074706	-	957	8	923	5	21	89.02	0.84	20.308	2.93e-35	0.400536
Correlated	IPMK	inositol polyphosphate multikinase [Source:HGNC Symbol;Acc:20739]	10	q21.1	-1	59951278	60027694	ENSG00000151151	-	1002	7	967	0	28	93.21	0.7	28.629	2.94e-44	0.440876
Correlated	IPO11	importin 11 [Source:HGNC Symbol;Acc:20628]	5	q12.1	1	61699799	61924409	ENSG00000086200	+	1049	6	1009	3	31	97.58	0.57	18.901	6.17e-25	0.318412
Correlated	IPO4	importin 4 [Source:HGNC Symbol;Acc:19426]	14	q12	-1	24649425	24658170	ENSG00000196497	+	947	5	916	2	24	88.09	0.53	23.325	5.81e-26	0.342418
Correlated	IPO9	importin 9 [Source:HGNC Symbol;Acc:19425]	1	q32.1	1	201798269	201853422	ENSG00000198700	+	1069	9	1022	11	27	99.44	0.84	13.362	2.03e-25	0.318665
Correlated	IQCA1	IQ motif containing with AAA domain 1 [Source:HGNC Symbol;Acc:26195]	2	q37.3	-1	237232794	237416185	ENSG00000132321	+	1040	8	996	6	30	96.74	0.77	15.639	6.65e-27	0.333014
Correlated	IQCF5-AS1	IQCF5 antisense RNA 1 [Source:HGNC Symbol;Acc:41297]	3	p21.2	1	51907612	51909783	ENSG00000235455	-	863	3	835	0	25	80.28	0.35	30.821	2.67e-21	0.322534
Correlated	IQCG	IQ motif containing G [Source:HGNC Symbol;Acc:25251]	3	q29	-1	197615946	197687013	ENSG00000114473	-	1043	6	1007	1	29	97.02	0.58	25.543	6.44e-34	0.375922
Correlated	IQCK	IQ motif containing K [Source:HGNC Symbol;Acc:28556]	16	p12.3	1	19727778	19868907	ENSG00000174628	+	974	4	942	1	27	90.6	0.41	25.135	1.02e-22	0.314343
Correlated	IQGAP3	IQ motif containing GTPase activating protein 3 [Source:HGNC Symbol;Acc:20669]	1	q23.1	-1	156495197	156542396	ENSG00000183856	+	1034	17	979	18	20	96.19	1.64	13.574	0	0.453387
Correlated	IRAK3	interleukin-1 receptor-associated kinase 3 [Source:HGNC Symbol;Acc:17020]	12	q14.3	1	66582659	66648402	ENSG00000090376	-	956	8	916	9	23	88.93	0.84	14.512	7.73e-25	0.332837
Correlated	IRF1	interferon regulatory factor 1 [Source:HGNC Symbol;Acc:6116]	5	q31.1	-1	131817301	131826490	ENSG00000125347	-	1073	6	1032	4	31	99.81	0.56	17.4	7.07e-23	0.300606
Correlated	IRF6	interferon regulatory factor 6 [Source:HGNC Symbol;Acc:6121]	1	q32.2	-1	209959036	209979465	ENSG00000117595	+	942	8	899	12	23	87.63	0.85	12.155	1.38e-20	0.303064
Correlated	IRF8	interferon regulatory factor 8 [Source:HGNC Symbol;Acc:5358]	LRG_294		1	5001	28439	LRG_294	-	942	6	910	3	23	87.63	0.64	21.655	1.3e-28	0.361554
Correlated	IRS1	insulin receptor substrate 1 [Source:HGNC Symbol;Acc:6125]	2	q36.3	-1	227599757	227664475	ENSG00000169047	+	1041	6	1002	4	29	96.84	0.58	17.846	1.78e-23	0.309453
Correlated	IRX1	iroquois homeobox 1 [Source:HGNC Symbol;Acc:14358]	5	p15.33	1	3596168	3601517	ENSG00000170549	+	1032	8	994	3	27	96	0.78	21.444	2.33e-37	0.397593
Correlated	IRX3	iroquois homeobox 3 [Source:HGNC Symbol;Acc:14360]	16	q12.2	-1	54317216	54320675	ENSG00000177508	+	1030	15	981	14	20	95.81	1.46	15.222	0	0.453999
Correlated	IRX5	iroquois homeobox 5 [Source:HGNC Symbol;Acc:14361]	16	q12.2	1	54964774	54968397	ENSG00000176842	+	947	13	910	7	17	88.09	1.37	20.518	0	0.518554
Correlated	ISG20	interferon stimulated exonuclease gene 20kDa [Source:HGNC Symbol;Acc:6130]	15	q26.1	1	89179384	89199714	ENSG00000172183	+	970	15	893	46	16	90.23	1.55	7.6943	9.85e-23	0.315093
Correlated	ISM1	isthmin 1, angiogenesis inhibitor [Source:HGNC Symbol;Acc:16213]	20	p12.1	1	13202418	13281298	ENSG00000101230	+	983	5	945	1	32	91.44	0.51	22.14	9.42e-25	0.327628
Correlated	ITGA4	integrin, alpha 4 (antigen CD49D, alpha 4 subunit of VLA-4 receptor) [Source:HGNC Symbol;Acc:6140]	2	q31.3	1	182321929	182400914	ENSG00000115232	+	949	11	908	12	18	88.28	1.16	15.651	1.47e-36	0.409941
Correlated	ITGA9	integrin, alpha 9 [Source:HGNC Symbol;Acc:6145]	3	p22.2	1	37493606	37865005	ENSG00000144668	-	1062	11	1019	8	24	98.79	1.04	17.567	3e-41	0.412786
Correlated	ITGAL	integrin, alpha L (antigen CD11A (p180), lymphocyte function-associated antigen 1; alpha polypeptide) [Source:HGNC Symbol;Acc:6148]	16	p11.2	1	30483979	30534506	ENSG00000005844	-	956	7	918	9	22	88.93	0.73	14.422	1e-21	0.309732
Correlated	ITGAX	integrin, alpha X (complement component 3 receptor 4 subunit) [Source:HGNC Symbol;Acc:6152]	16	p11.2	1	31366455	31394318	ENSG00000140678	-	945	6	912	3	24	87.91	0.63	21	9.62e-28	0.35511
Correlated	ITGB1	integrin, beta 1 (fibronectin receptor, beta polypeptide, antigen CD29 includes MDF2, MSK12) [Source:HGNC Symbol;Acc:6153]	10	p11.22	-1	33189247	33294720	ENSG00000150093	+	953	11	908	16	18	88.65	1.15	13.388	5.92e-31	0.374757
Correlated	ITGB3	integrin, beta 3 (platelet glycoprotein IIIa, antigen CD61) [Source:HGNC Symbol;Acc:6156]	17	q21.32	1	45331212	45421658	ENSG00000259207	-	944	7	908	5	24	87.81	0.74	17.763	4.82e-27	0.350503
Correlated	ITGB4	integrin, beta 4 [Source:HGNC Symbol;Acc:6158]	17	q25.1	1	73717408	73753899	ENSG00000132470	+	1033	9	992	5	27	96.09	0.87	18.446	8.54e-36	0.388586
Correlated	ITGB5	integrin, beta 5 [Source:HGNC Symbol;Acc:6160]	3	q21.2	-1	124480795	124606674	ENSG00000082781	+	948	8	914	5	21	88.19	0.84	20.117	6.33e-35	0.400424
Correlated	ITIH4	inter-alpha-trypsin inhibitor heavy chain family, member 4 [Source:HGNC Symbol;Acc:6169]	3	p21.1	-1	52846991	52865495	ENSG00000055955	-	955	5	922	1	27	88.84	0.52	24.87	9.14e-28	0.353399
Correlated	ITIH5	inter-alpha-trypsin inhibitor heavy chain family, member 5 [Source:HGNC Symbol;Acc:21449]	10	p14	-1	7601232	7708961	ENSG00000123243	-	921	9	881	11	20	85.67	0.98	14.291	2.32e-27	0.357058
Correlated	ITPK1	inositol-tetrakisphosphate 1-kinase [Source:HGNC Symbol;Acc:6177]	14	q32.12	-1	93403259	93582665	ENSG00000100605	-	976	11	940	5	20	90.79	1.13	21.645	0	0.482734
Correlated	ITPKA	inositol-trisphosphate 3-kinase A [Source:HGNC Symbol;Acc:6178]	15	q15.1	1	41785591	41795747	ENSG00000137825	-	937	7	906	3	21	87.16	0.75	23.425	6.34e-36	0.40878
Correlated	ITPR1	inositol 1,4,5-trisphosphate receptor, type 1 [Source:HGNC Symbol;Acc:6180]	3	p26.1	1	4535032	4889524	ENSG00000150995	-	1072	14	1016	18	24	99.72	1.31	12.342	8.72e-36	0.381402
Correlated	ITSN1	intersectin 1 (SH3 domain protein) [Source:HGNC Symbol;Acc:6183]	21	q22.11	1	35014706	35272165	ENSG00000205726	-	1035	12	987	10	26	96.28	1.16	14.856	1.18e-37	0.39866
Correlated	ITSN2	intersectin 2 [Source:HGNC Symbol;Acc:6184]	2	p23.3	-1	24425733	24583583	ENSG00000198399	-	1052	7	1010	4	31	97.86	0.67	17.617	7.74e-27	0.330676
Correlated	IVD	isovaleryl-CoA dehydrogenase [Source:HGNC Symbol;Acc:6186]	15	q15.1	1	40697686	40728146	ENSG00000128928	-	1049	10	999	14	26	97.58	0.95	12.141	2.26e-25	0.321383
Correlated	IZUMO1	izumo sperm-egg fusion 1 [Source:HGNC Symbol;Acc:28539]	19	q13.33	-1	49244109	49250166	ENSG00000182264	+	890	5	862	0	23	82.79	0.56	31.786	1.55e-35	0.41705
Correlated	JAG1	jagged 1 [Source:HGNC Symbol;Acc:6188]	20	p12.2	-1	10618332	10654694	ENSG00000101384	-	1064	5	1026	1	32	98.98	0.47	23.964	9.44e-27	0.328243
Correlated	JAK1	Janus kinase 1 [Source:HGNC Symbol;Acc:6190]	1	p31.3	-1	65298912	65432187	ENSG00000162434	-	1063	8	1017	8	30	98.88	0.75	13.987	6.89e-24	0.309115
Correlated	JAK3	Janus kinase 3 [Source:HGNC Symbol;Acc:6193]	LRG_77		1	4960	28210	LRG_77	-	1047	7	1005	7	28	97.4	0.67	14.957	1.41e-22	0.302172
Correlated	JAKMIP1	janus kinase and microtubule interacting protein 1 [Source:HGNC Symbol;Acc:26460]	4	p16.1	-1	6027926	6202318	ENSG00000152969	-	1009	10	967	7	25	93.86	0.99	16.958	2.75e-36	0.396005
Correlated	JAKMIP3	Janus kinase and microtubule interacting protein 3 [Source:HGNC Symbol;Acc:23523]	10	q26.3	1	133918175	133998313	ENSG00000188385	-	977	10	936	6	25	90.88	1.02	17.446	1.97e-37	0.409052
Correlated	JAM2	junctional adhesion molecule 2 [Source:HGNC Symbol;Acc:14686]	21	q21.3	1	27011584	27089874	ENSG00000154721	-	1038	10	992	11	25	96.56	0.96	14.122	7.53e-30	0.352247
Correlated	JAM3	junctional adhesion molecule 3 [Source:HGNC Symbol;Acc:15532]	11	q25	1	133938820	134021896	ENSG00000166086	-	1050	12	998	14	26	97.67	1.14	12.753	6.32e-32	0.362901
Correlated	JAZF1-AS1	JAZF1 antisense RNA 1 [UniGene: JAZF1 antisense RNA 1 (non-protein coding)]						unknown	-	822	5	793	2	22	76.47	0.61	21.746	3.03e-24	0.354326
Correlated	JMJD1C	jumonji domain containing 1C [Source:HGNC Symbol;Acc:12313]	10	q21.3	-1	64926981	65225722	ENSG00000171988	+	1072	12	1013	21	26	99.72	1.12	10.258	3.91e-25	0.316312
Correlated	JPH3	junctophilin 3 [Source:HGNC Symbol;Acc:14203]	16	q24.2	1	87635441	87731762	ENSG00000154118	-	1053	10	1004	12	27	97.95	0.95	12.936	3.55e-27	0.332735
Correlated	JRKL	jerky homolog-like (mouse) [Source:HGNC Symbol;Acc:6200]	11	q21	1	96123153	96240738	ENSG00000183340	+	968	3	937	0	28	90.05	0.31	31.226	1.47e-21	0.306539
Correlated	KALRN	kalirin, RhoGEF kinase [Source:HGNC Symbol;Acc:4814]	3	q21.1	1	123798870	124440036	ENSG00000160145	-	1051	12	1012	3	24	97.77	1.14	23.356	0	0.506605
Correlated	KANK2	KN motif and ankyrin repeat domains 2 [Source:HGNC Symbol;Acc:29300]	19	p13.2	-1	11274943	11308467	ENSG00000197256	-	954	9	910	13	22	88.74	0.94	12.589	6.84e-24	0.326322
Correlated	KANK3	KN motif and ankyrin repeat domains 3 [Source:HGNC Symbol;Acc:24796]	19	p13.2	-1	8387468	8408146	ENSG00000186994	-	942	6	912	1	23	87.63	0.64	27.842	5.59e-37	0.413931
Correlated	KAT2B	K(lysine) acetyltransferase 2B [Source:HGNC Symbol;Acc:8638]	3	p24.3	1	20081515	20195896	ENSG00000114166	+	1066	12	1021	7	26	99.16	1.13	17.717	2.8e-45	0.432981
Correlated	KATNAL1	katanin p60 subunit A-like 1 [Source:HGNC Symbol;Acc:28361]	13	q12.3	-1	30776767	30881621	ENSG00000102781	-	1045	7	1002	5	31	97.21	0.67	16.042	2.42e-24	0.31493
Correlated	KAZALD1	Kazal-type serine peptidase inhibitor domain 1 [Source:HGNC Symbol;Acc:25460]	10	q24.31	1	102821598	102827888	ENSG00000107821	+	923	14	888	5	16	85.86	1.52	22.67	0	0.575824
Correlated	KBTBD11	kelch repeat and BTB (POZ) domain containing 11 [Source:HGNC Symbol;Acc:29104]	8	p23.3	1	1922044	1955102	ENSG00000176595	-	953	10	912	12	19	88.65	1.05	14.937	1.04e-31	0.379558
Correlated	KBTBD2	kelch repeat and BTB (POZ) domain containing 2 [Source:HGNC Symbol;Acc:21751]	7	p14.3	-1	32907784	32933743	ENSG00000170852	+	1073	6	1032	4	31	99.81	0.56	17.4	7.07e-23	0.300606
Correlated	KCNA2	potassium voltage-gated channel, shaker-related subfamily, member 2 [Source:HGNC Symbol;Acc:6220]	1	p13.3	-1	111136202	111174096	ENSG00000177301	-	1029	5	992	2	30	95.72	0.49	21	2.21e-23	0.310595
Correlated	KCNA4	potassium voltage-gated channel, shaker-related subfamily, member 4 [Source:HGNC Symbol;Acc:6222]	11	p14.1	-1	30031288	30038570	ENSG00000182255	-	945	5	913	1	26	87.91	0.53	25.403	2.35e-28	0.359251
Correlated	KCNAB1	potassium voltage-gated channel, shaker-related subfamily, beta member 1 [Source:HGNC Symbol;Acc:6228]	3	q25.31	1	155755490	156256545	ENSG00000169282	-	966	10	926	9	21	89.86	1.04	16.401	5.16e-35	0.397207
Correlated	KCNAB2	potassium voltage-gated channel, shaker-related subfamily, beta member 2 [Source:HGNC Symbol;Acc:6229]	1	p36.31	1	6051526	6161253	ENSG00000069424	-	958	10	917	12	19	89.12	1.04	15.016	7.01e-32	0.379646
Correlated	KCNC2	potassium voltage-gated channel, Shaw-related subfamily, member 2 [Source:HGNC Symbol;Acc:6234]	12	q21.1	-1	75433857	75603648	ENSG00000166006	-	1020	6	979	3	32	94.88	0.59	17.895	1.32e-23	0.313569
Correlated	KCNC3	potassium voltage-gated channel, Shaw-related subfamily, member 3 [Source:HGNC Symbol;Acc:6235]	19	q13.33	-1	50815194	50836772	ENSG00000131398	-	1019	6	980	3	30	94.79	0.59	18.87	6.68e-25	0.322826
Correlated	KCNC4	potassium voltage-gated channel, Shaw-related subfamily, member 4 [Source:HGNC Symbol;Acc:6236]	1	p13.3	1	110753965	110825722	ENSG00000116396	-	1005	7	967	5	26	93.49	0.7	17.765	5.01e-27	0.339584
Correlated	KCND2	potassium voltage-gated channel, Shal-related subfamily, member 2 [Source:HGNC Symbol;Acc:6238]	7	q31.31	1	119913722	120390385	ENSG00000184408	-	930	6	898	3	23	86.51	0.65	21.379	2.99e-28	0.361424
Correlated	KCNE3	potassium voltage-gated channel, Isk-related family, member 3 [Source:HGNC Symbol;Acc:6243]	LRG_439		1	5001	17715	LRG_439	+	1059	11	1005	18	25	98.51	1.04	11.158	2.35e-25	0.319745
Correlated	KCNG3	potassium voltage-gated channel, subfamily G, member 3 [Source:HGNC Symbol;Acc:18306]	2	p21	-1	42669157	42721237	ENSG00000171126	-	914	10	876	9	19	85.02	1.09	16.588	1.81e-35	0.411134
Correlated	KCNH3	potassium voltage-gated channel, subfamily H (eag-related), member 3 [Source:HGNC Symbol;Acc:6252]	12	q13.12	1	49932940	49952091	ENSG00000135519	-	1059	7	1017	5	30	98.51	0.66	16.696	2.36e-25	0.319728
Correlated	KCNH8	potassium voltage-gated channel, subfamily H (eag-related), member 8 [Source:HGNC Symbol;Acc:18864]	3	p24.3	1	19189946	19577138	ENSG00000183960	-	921	5	889	3	24	85.67	0.54	19.849	4.69e-22	0.31814
Correlated	KCNIP2	Kv channel interacting protein 2 [Source:HGNC Symbol;Acc:15522]	10	q24.32	-1	103585731	103603677	ENSG00000120049	-	1043	9	1006	2	26	97.02	0.86	24.382	0	0.44982
Correlated	KCNIP3	Kv channel interacting protein 3, calsenilin [Source:HGNC Symbol;Acc:15523]	2	q11.1	1	95963052	96051825	ENSG00000115041	-	1064	10	1021	5	28	98.98	0.94	18.667	3.86e-40	0.406566
Correlated	KCNIP4	Kv channel interacting protein 4 [Source:HGNC Symbol;Acc:30083]	4	p15.2	-1	20730239	21950422	ENSG00000185774	-	1051	9	1008	5	29	97.77	0.86	17.78	1.85e-34	0.377621
Correlated	KCNJ12	potassium inwardly-rectifying channel, subfamily J, member 12 [Source:HGNC Symbol;Acc:6258]	HG987_PATCH	p11.2	1	21279699	21320404	ENSG00000261309	-	1045	10	1002	8	25	97.21	0.96	16.587	2.09e-35	0.384145
Correlated	KCNJ2	potassium inwardly-rectifying channel, subfamily J, member 2 [Source:HGNC Symbol;Acc:6263]	LRG_328		1	5001	15510	LRG_328	-	1050	7	1008	7	28	97.67	0.67	15	1.21e-22	0.302213
Correlated	KCNJ4	potassium inwardly-rectifying channel, subfamily J, member 4 [Source:HGNC Symbol;Acc:6265]	22	q13.1	-1	38822332	38851205	ENSG00000168135	-	941	7	910	2	22	87.53	0.74	25.238	8.41e-39	0.424721
Correlated	KCNJ5	potassium inwardly-rectifying channel, subfamily J, member 5 [Source:HGNC Symbol;Acc:6266]	LRG_333		1	5001	31652	LRG_333	-	935	5	903	3	24	86.98	0.53	20.151	2.19e-22	0.318294
Correlated	KCNJ6	potassium inwardly-rectifying channel, subfamily J, member 6 [Source:HGNC Symbol;Acc:6267]	21	q22.13	-1	38996789	39288749	ENSG00000157542	-	929	6	897	3	23	86.42	0.65	21.356	3.21e-28	0.361414
Correlated	KCNJ9	potassium inwardly-rectifying channel, subfamily J, member 9 [Source:HGNC Symbol;Acc:6270]	1	q23.2	1	160051360	160060353	ENSG00000162728	-	1016	5	980	1	30	94.51	0.49	24.19	5.23e-27	0.337617
Correlated	KCNK1	potassium channel, subfamily K, member 1 [Source:HGNC Symbol;Acc:6272]	1	q42.2	1	233749750	233808258	ENSG00000135750	-	958	8	922	5	23	89.12	0.84	19.017	5.68e-33	0.386445
Correlated	KCNK1	potassium channel, subfamily K, member 1 [Source:HGNC Symbol;Acc:6272]	1	q42.2	1	233749750	233808258	ENSG00000135750	+	958	9	918	9	22	89.12	0.94	15.452	1.06e-29	0.365704
Correlated	KCNK10	potassium channel, subfamily K, member 10 [Source:HGNC Symbol;Acc:6273]	14	q31.3	-1	88649113	88793251	ENSG00000100433	-	1054	8	1012	4	30	98.05	0.76	18.491	4.65e-32	0.363013
Correlated	KCNK12	potassium channel, subfamily K, member 12 [Source:HGNC Symbol;Acc:6274]	2	p21	-1	47747910	47798078	ENSG00000184261	-	931	10	898	4	19	86.6	1.07	22.931	0	0.485886
Correlated	KCNK17	potassium channel, subfamily K, member 17 [Source:HGNC Symbol;Acc:14465]	6	p21.2	-1	39266777	39282329	ENSG00000124780	-	1004	6	966	3	29	93.4	0.6	19.124	3.06e-25	0.327591
Correlated	KCNK5	potassium channel, subfamily K, member 5 [Source:HGNC Symbol;Acc:6280]	6	p21.2	-1	39156749	39197226	ENSG00000164626	-	962	6	928	4	24	89.49	0.62	19.24	2.41e-25	0.335397
Correlated	KCNK9	potassium channel, subfamily K, member 9 [Source:HGNC Symbol;Acc:6283]	8	q24.3	-1	140613081	140715299	ENSG00000169427	-	1052	7	1012	3	30	97.86	0.67	19.903	1.92e-30	0.353556
Correlated	KCNMB3	potassium large conductance calcium-activated channel, subfamily M beta member 3 [Source:HGNC Symbol;Acc:6287]	3	q26.32	-1	178957530	178984790	ENSG00000171121	+	937	4	907	2	24	87.16	0.43	22.31	3.91e-20	0.300242
Correlated	KCNMB4	potassium large conductance calcium-activated channel, subfamily M, beta member 4 [Source:HGNC Symbol;Acc:6289]	12	q15	1	70760056	70828072	ENSG00000135643	-	1060	14	1014	9	23	98.6	1.32	17.438	0	0.46558
Correlated	KCNQ2	potassium voltage-gated channel, KQT-like subfamily, member 2 [Source:HGNC Symbol;Acc:6296]	20	q13.33	-1	62037542	62103993	ENSG00000075043	-	952	8	916	4	24	88.56	0.84	19.833	1.79e-34	0.396858
Correlated	KCNQ5	potassium voltage-gated channel, KQT-like subfamily, member 5 [Source:HGNC Symbol;Acc:6299]	6	q13	1	73331520	73908574	ENSG00000185760	-	1029	13	976	16	24	95.72	1.26	12.467	1.09e-33	0.37713
Correlated	KCNS1	potassium voltage-gated channel, delayed-rectifier, subfamily S, member 1 [Source:HGNC Symbol;Acc:6300]	20	q13.12	-1	43720951	43729753	ENSG00000124134	-	930	5	900	2	23	86.51	0.54	23.724	2.09e-26	0.348673
Correlated	KCNS2	potassium voltage-gated channel, delayed-rectifier, subfamily S, member 2 [Source:HGNC Symbol;Acc:6301]	8	q22.2	1	99439250	99445076	ENSG00000156486	-	1038	7	999	4	28	96.56	0.67	18.873	8.74e-29	0.34553
Correlated	KCNT2	potassium channel, subfamily T, member 2 [Source:HGNC Symbol;Acc:18866]	1	q31.3	-1	196194909	196577541	ENSG00000162687	-	999	8	956	10	25	92.93	0.8	13.455	6.49e-23	0.311816
Correlated	KCNV1	potassium channel, subfamily V, member 1 [Source:HGNC Symbol;Acc:18861]	8	q23.2	-1	110975874	110988076	ENSG00000164794	-	935	5	904	3	23	86.98	0.53	20.871	3.5e-23	0.324332
Correlated	KCTD1	potassium channel tetramerization domain containing 1 [Source:HGNC Symbol;Acc:18249]	18	q11.2	-1	24034874	24237365	ENSG00000134504	-	1014	7	974	4	29	94.33	0.69	17.924	2.53e-27	0.340045
Correlated	KCTD10	potassium channel tetramerization domain containing 10 [Source:HGNC Symbol;Acc:23236]	12	q24.11	-1	109886461	109915349	ENSG00000110906	-	1061	6	1024	2	29	98.7	0.57	22.736	4.29e-30	0.349917
Correlated	KCTD13	potassium channel tetramerization domain containing 13 [Source:HGNC Symbol;Acc:22234]	16	p11.2	-1	29916333	29938356	ENSG00000174943	-	946	8	911	3	24	88	0.85	21.5	1.71e-37	0.416051
Correlated	KCTD15	potassium channel tetramerization domain containing 15 [Source:HGNC Symbol;Acc:23297]	19	q13.11	1	34286838	34306666	ENSG00000153885	+	1069	10	1022	11	26	99.44	0.94	14.14	7.14e-30	0.347242
Correlated	KCTD16	potassium channel tetramerization domain containing 16 [Source:HGNC Symbol;Acc:29244]	5	q31.3	1	143550396	143856945	ENSG00000183775	-	1034	7	997	2	28	96.19	0.68	22.978	2.77e-35	0.385473
Correlated	KCTD4	potassium channel tetramerization domain containing 4 [Source:HGNC Symbol;Acc:23227]	13	q14.12	-1	45766988	45775175	ENSG00000180332	-	1029	10	983	11	25	95.72	0.97	14	1.4e-29	0.352098
Correlated	KCTD7	potassium channel tetramerization domain containing 7 [Source:HGNC Symbol;Acc:21957]	7	q11.21	1	66093868	66276446	ENSG00000243335	+	931	8	894	6	23	86.6	0.86	17.161	1.2e-29	0.370608
Correlated	KDELC1	KDEL (Lys-Asp-Glu-Leu) containing 1 [Source:HGNC Symbol;Acc:19350]	13	q33.1	-1	103436631	103451357	ENSG00000134901	-	950	5	918	3	24	88.37	0.53	20.474	9.66e-23	0.318454
Correlated	KDELR2	KDEL (Lys-Asp-Glu-Leu) endoplasmic reticulum protein retention receptor 2 [Source:HGNC Symbol;Acc:6305]	7	p22.1	-1	6485584	6523873	ENSG00000136240	+	975	9	938	6	22	90.7	0.92	18.871	1.27e-36	0.404812
Correlated	KDM5B	lysine (K)-specific demethylase 5B [Source:HGNC Symbol;Acc:18039]	1	q32.1	-1	202696526	202778598	ENSG00000117139	+	964	8	927	6	23	89.67	0.83	17.77	1.03e-30	0.371077
Correlated	KDM5D	lysine (K)-specific demethylase 5D [Source:HGNC Symbol;Acc:11115]	Y	q11.222	-1	21865751	21906825	ENSG00000012817	-	957	8	923	3	23	89.02	0.84	22.452	3.61e-39	0.423239
Correlated	KEL	Kell blood group, metallo-endopeptidase [Source:HGNC Symbol;Acc:6308]	HG7_PATCH	q34	-1	142701710	142723277	ENSG00000260040	+	942	6	907	5	24	87.63	0.64	17.127	1.7e-22	0.31794
Correlated	KGFLP2	keratinocyte growth factor-like protein 2///uncharacterized protein FLJ20444 [UniGene: Keratinocyte growth factor-like protein 2]						unknown	-	982	9	942	3	28	91.35	0.92	19.905	7.38e-39	0.416079
Correlated	KHNYN	KH and NYN domain containing [Source:HGNC Symbol;Acc:20166]	14	q12	1	24898492	24910540	ENSG00000100441	+	952	5	920	3	24	88.56	0.53	20.517	8.67e-23	0.318475
Correlated	KIAA0101	KIAA0101 [Source:HGNC Symbol;Acc:28961]	15	q22.31	-1	64657193	64679886	ENSG00000166803	+	969	14	925	15	15	90.14	1.44	16.131	0	0.466801
Correlated	KIAA0226	KIAA0226 [Source:HGNC Symbol;Acc:28991]	3	q29	-1	197398264	197476598	ENSG00000145016	-	974	7	938	4	25	90.6	0.72	19.369	1.42e-29	0.361848
Correlated	KIAA0319	KIAA0319 [Source:HGNC Symbol;Acc:21580]	6	p22.3	-1	24544332	24646383	ENSG00000137261	-	943	8	908	4	23	87.72	0.85	20.28	2.88e-35	0.403549
Correlated	KIAA0368	KIAA0368 [Source:HGNC Symbol;Acc:29020]	9	q31.3	-1	114122972	114247025	ENSG00000136813	-	1025	7	983	6	29	95.35	0.68	15.331	3.36e-23	0.309897
Correlated	KIAA0494	[UniGene: KIAA0494]						unknown	+	840	6	813	0	21	78.14	0.71	31.111	1.8e-41	0.465432
Correlated	KIAA0494	[UniGene: KIAA0494]						unknown	-	840	3	813	0	24	78.14	0.36	31.111	1.71e-21	0.32852
Correlated	KIAA0513	KIAA0513 [Source:HGNC Symbol;Acc:29058]	16	q24.1	1	85061375	85127836	ENSG00000135709	-	974	10	925	18	21	90.6	1.03	11.221	2.51e-23	0.318831
Correlated	KIAA0825	KIAA0825 [Source:HGNC Symbol;Acc:28532]	5	q15	-1	93488671	93954309	ENSG00000185261	-	1023	8	983	3	29	95.16	0.78	20.108	5.31e-35	0.38591
Correlated	KIAA0930	KIAA0930 [Source:HGNC Symbol;Acc:1314]	22	q13.31	-1	45588114	45636650	ENSG00000100364	+	1068	7	1029	4	28	99.35	0.66	19.418	1.28e-29	0.345851
Correlated	KIAA1033	KIAA1033 [Source:HGNC Symbol;Acc:29174]	12	q23.3	1	105501102	105562912	ENSG00000136051	+	976	6	941	4	25	90.79	0.61	18.89	7.08e-25	0.329681
Correlated	KIAA1033	KIAA1033 [Source:HGNC Symbol;Acc:29174]	12	q23.3	1	105501102	105562912	ENSG00000136051	-	976	9	938	7	22	90.79	0.92	17.71	2.88e-34	0.390713
Correlated	KIAA1107	KIAA1107 [Source:HGNC Symbol;Acc:29192]	1	p22.1	1	92632542	92650280	ENSG00000069712	-	927	9	885	11	22	86.23	0.97	13.456	1.12e-25	0.344059
Correlated	KIAA1239	KIAA1239 [Source:HGNC Symbol;Acc:29229]	4	p14	1	37245842	37451087	ENSG00000174145	-	1019	6	982	2	29	94.79	0.59	21.836	6.52e-29	0.349554
Correlated	KIAA1244	KIAA1244 [Source:HGNC Symbol;Acc:21213]	6	q23.3	1	138483058	138665800	ENSG00000112379	-	1057	10	1006	15	26	98.33	0.95	11.744	1.8e-24	0.314017
Correlated	KIAA1462	KIAA1462 [Source:HGNC Symbol;Acc:29283]	10	p11.23	-1	30301729	30404423	ENSG00000165757	-	1050	9	1001	12	28	97.67	0.86	12.162	5.34e-23	0.304752
Correlated	KIAA1524	KIAA1524 [Source:HGNC Symbol;Acc:29302]	3	q13.13	-1	108268716	108308491	ENSG00000163507	+	1047	7	1006	5	29	97.4	0.67	16.965	8.96e-26	0.324394
Correlated	KIAA1549L	[UniGene: NA]						unknown	-	1024	13	983	6	22	95.26	1.27	20.018	0	0.491921
Correlated	KIAA1598	KIAA1598 [Source:HGNC Symbol;Acc:29319]	10	q25.3	-1	118643742	118886097	ENSG00000187164	-	960	8	924	7	21	89.3	0.83	17.655	1.77e-30	0.370342
Correlated	KIAA1644	KIAA1644 [Source:HGNC Symbol;Acc:29335]	22	q13.31	-1	44639547	44708731	ENSG00000138944	-	925	7	890	6	22	86.05	0.76	17.175	4.26e-26	0.347428
Correlated	KIAA1661	KIAA1661 protein						unknown	+	858	4	828	1	25	79.81	0.47	23.669	1.94e-21	0.324612
Correlated	KIAA1715	KIAA1715 [Source:HGNC Symbol;Acc:21610]	2	q31.1	-1	176788620	176867567	ENSG00000144320	+	1035	8	991	8	28	96.28	0.77	14.375	1.38e-24	0.318152
Correlated	KIAA1841	KIAA1841 [Source:HGNC Symbol;Acc:29387]	2	p16.1	1	61293006	61391960	ENSG00000162929	+	1000	6	960	4	30	93.02	0.6	16.667	6.45e-22	0.304279
Correlated	KIAA1984	KIAA1984 [Source:HGNC Symbol;Acc:28236]	9	q34.3	1	139690802	139704494	ENSG00000213213	+	934	6	898	2	28	86.88	0.64	20.603	2.68e-27	0.354143
Correlated	KIAA2018	KIAA2018 [Source:HGNC Symbol;Acc:30494]	3	q13.2	-1	113367232	113415493	ENSG00000176542	-	1006	8	965	5	28	93.58	0.8	17.197	1e-29	0.357014
Correlated	KIAA2022	KIAA2022 [Source:HGNC Symbol;Acc:29433]	X	q13.3	-1	73952684	74145320	ENSG00000050030	-	1019	10	967	15	27	94.79	0.98	11.016	7.37e-23	0.308337
Correlated	KIDINS220	kinase D-interacting substrate, 220kDa [Source:HGNC Symbol;Acc:29508]	2	p25.1	-1	8865408	8977760	ENSG00000134313	+	1069	7	1026	6	30	99.44	0.65	15.557	1.54e-23	0.305828
Correlated	KIDINS220	kinase D-interacting substrate, 220kDa [Source:HGNC Symbol;Acc:29508]	2	p25.1	-1	8865408	8977760	ENSG00000134313	-	1069	6	1028	4	31	99.44	0.56	17.335	8.61e-23	0.300563
Correlated	KIF11	kinesin family member 11 [Source:HGNC Symbol;Acc:6388]	10	q23.33	1	94353043	94415150	ENSG00000138160	+	951	14	909	13	15	88.47	1.47	17.004	0	0.485181
Correlated	KIF14	kinesin family member 14 [Source:HGNC Symbol;Acc:19181]	1	q32.1	-1	200520628	200589862	ENSG00000118193	+	1069	17	1011	21	20	99.44	1.59	12.925	1.4e-45	0.433504
Correlated	KIF17	kinesin family member 17 [Source:HGNC Symbol;Acc:19167]	1	p36.12	-1	20990507	21044510	ENSG00000117245	-	926	7	896	2	21	86.14	0.76	25.722	1.48e-39	0.432479
Correlated	KIF18A	kinesin family member 18A [Source:HGNC Symbol;Acc:29441]	11	p14.1	-1	28042167	28129855	ENSG00000121621	+	924	11	883	11	19	85.95	1.19	15.4	5.61e-36	0.411967
Correlated	KIF18B	kinesin family member 18B [Source:HGNC Symbol;Acc:27102]	17	q21.31	-1	43002077	43025082	ENSG00000186185	+	882	12	843	10	17	82.05	1.36	16.589	1.92e-42	0.459742
Correlated	KIF1A	kinesin family member 1A [Source:HGNC Symbol;Acc:888]	2	q37.3	-1	241653181	241759725	ENSG00000130294	-	1058	13	1017	4	24	98.42	1.23	21.866	0	0.507617
Correlated	KIF20A	kinesin family member 20A [Source:HGNC Symbol;Acc:9787]	5	q31.2	1	137514408	137523404	ENSG00000112984	+	935	15	887	20	13	86.98	1.6	14.311	4.2e-45	0.461218
Correlated	KIF21A	kinesin family member 21A [Source:HGNC Symbol;Acc:19349]	12	q12	-1	39687030	39837192	ENSG00000139116	+	1058	11	1006	16	25	98.42	1.04	11.973	2.21e-27	0.333283
Correlated	KIF21B	kinesin family member 21B [Source:HGNC Symbol;Acc:29442]	1	q32.1	-1	200938520	200992828	ENSG00000116852	-	933	6	898	4	25	86.79	0.64	18.058	8.8e-24	0.32916
Correlated	KIF23	kinesin family member 23 [Source:HGNC Symbol;Acc:6392]	15	q23	1	69706585	69740764	ENSG00000137807	+	1048	15	999	13	21	97.49	1.43	15.595	0	0.456091
Correlated	KIF26A	kinesin family member 26A [Source:HGNC Symbol;Acc:20226]	14	q32.33	1	104605060	104647231	ENSG00000066735	+	1036	8	996	5	27	96.37	0.77	18.215	1.61e-31	0.362884
Correlated	KIF26A	kinesin family member 26A [Source:HGNC Symbol;Acc:20226]	14	q32.33	1	104605060	104647231	ENSG00000066735	-	1036	8	993	8	27	96.37	0.77	14.8	2.42e-25	0.323189
Correlated	KIF2C	kinesin family member 2C [Source:HGNC Symbol;Acc:6393]	1	p34.1	1	45205490	45233439	ENSG00000142945	+	953	11	911	13	18	88.65	1.15	15.062	4.26e-35	0.400407
Correlated	KIF3A	kinesin family member 3A [Source:HGNC Symbol;Acc:6319]	5	q31.1	-1	132028320	132073330	ENSG00000131437	-	1066	8	1022	6	30	99.16	0.75	16.03	1.37e-27	0.333359
Correlated	KIF3C	kinesin family member 3C [Source:HGNC Symbol;Acc:6321]	2	p23.3	-1	26149471	26205618	ENSG00000084731	-	967	9	925	13	20	89.95	0.93	13.641	5.3e-26	0.339138
Correlated	KIF4A	kinesin family member 4A [Source:HGNC Symbol;Acc:13339]	X	q13.1	1	69509879	69640682	ENSG00000090889	+	950	15	904	17	14	88.37	1.58	15.356	0	0.475603
Correlated	KIF5A	kinesin family member 5A [Source:HGNC Symbol;Acc:6323]	12	q13.3	1	57943781	57980415	ENSG00000155980	-	1018	9	980	3	26	94.7	0.88	21.814	1.23e-42	0.428954
Correlated	KIF5C	kinesin family member 5C [Source:HGNC Symbol;Acc:6325]	HSCHR2_2_CTG12	q23.1	1	149632819	149889353	ENSG00000262907	-	930	13	890	11	16	86.51	1.4	17.371	0	0.478019
Correlated	KIF6	kinesin family member 6 [Source:HGNC Symbol;Acc:21202]	6	p21.2	-1	39297766	39693181	ENSG00000164627	+	1038	7	997	5	29	96.56	0.67	16.819	1.5e-25	0.324284
Correlated	KIFC1	kinesin family member C1 [Source:HGNC Symbol;Acc:6389]	6	p21.32	1	33359313	33377701	ENSG00000237649	+	1019	9	972	10	28	94.79	0.88	13.046	7.97e-25	0.32229
Correlated	KIRREL3	kin of IRRE like 3 (Drosophila) [Source:HGNC Symbol;Acc:23204]	11	q24.2	-1	126293254	126873355	ENSG00000149571	-	1015	7	977	2	29	94.42	0.69	21.929	1.14e-33	0.379604
Correlated	KISS1R	KISS1 receptor [Source:HGNC Symbol;Acc:4510]	19	p13.3	1	917287	921015	ENSG00000116014	-	1018	9	969	13	27	94.7	0.88	11.568	8.38e-22	0.30073
Correlated	KLC1	kinesin light chain 1 [Source:HGNC Symbol;Acc:6387]	14	q32.33	1	104028233	104167888	ENSG00000126214	-	1050	10	1010	5	25	97.67	0.95	20	4.23e-43	0.424747
Correlated	KLF1	Kruppel-like factor 1 (erythroid) [Source:HGNC Symbol;Acc:6345]	19	p13.2	-1	12995237	12997995	ENSG00000105610	+	957	6	921	5	25	89.02	0.63	16.839	4.15e-22	0.312497
Correlated	KLF11	Kruppel-like factor 11 [Source:HGNC Symbol;Acc:11811]	2	p25.1	1	10182976	10194963	ENSG00000172059	-	973	9	932	10	22	90.51	0.92	14.868	1.67e-28	0.355025
Correlated	KLF12	Kruppel-like factor 12 [Source:HGNC Symbol;Acc:6346]	13	q22.1	-1	74260226	74708394	ENSG00000118922	-	1049	13	990	21	25	97.58	1.24	10.555	4.72e-28	0.33904
Correlated	KLF12	Kruppel-like factor 12 [Source:HGNC Symbol;Acc:6346]	13	q22.1	-1	74260226	74708394	ENSG00000118922	+	1049	10	998	13	28	97.58	0.95	12.002	4.47e-25	0.319367
Correlated	KLF13	Kruppel-like factor 13 [Source:HGNC Symbol;Acc:13672]	15	q13.3	1	31619058	31727868	ENSG00000169926	-	1063	6	1023	4	30	98.88	0.56	17.717	2.67e-23	0.305001
Correlated	KLF15	Kruppel-like factor 15 [Source:HGNC Symbol;Acc:14536]	3	q21.3	-1	126061478	126076285	ENSG00000163884	-	1027	11	983	8	25	95.53	1.07	16.516	1.05e-38	0.406016
Correlated	KLF16	Kruppel-like factor 16 [Source:HGNC Symbol;Acc:16857]	19	p13.3	-1	1852399	1863567	ENSG00000129911	-	1043	9	999	8	27	97.02	0.86	15.338	1.85e-29	0.348966
Correlated	KLF17	Kruppel-like factor 17 [Source:HGNC Symbol;Acc:18830]	1	p34.1	1	44584522	44600812	ENSG00000171872	+	888	3	860	0	25	82.6	0.34	31.714	6.89e-22	0.32267
Correlated	KLF3	Kruppel-like factor 3 (basic) [Source:HGNC Symbol;Acc:16516]	4	p14	1	38665817	38702663	ENSG00000109787	+	1073	9	1028	7	29	99.81	0.84	15.883	1.43e-30	0.350866
Correlated	KLF9	Kruppel-like factor 9 [Source:HGNC Symbol;Acc:1123]	9	q21.12	-1	72999503	73029540	ENSG00000119138	-	1065	10	1016	12	27	99.07	0.94	13.084	1.69e-27	0.332941
Correlated	KLHDC8A	kelch domain containing 8A [Source:HGNC Symbol;Acc:25573]	1	q32.1	-1	205305220	205326218	ENSG00000162873	+	1063	10	1011	15	27	98.88	0.94	11.492	6.68e-24	0.309209
Correlated	KLHDC8B	kelch domain containing 8B [Source:HGNC Symbol;Acc:28557]	3	p21.31	1	49209044	49213917	ENSG00000185909	+	1053	9	1011	6	27	97.95	0.85	17.55	5.99e-34	0.374314
Correlated	KLHL1	kelch-like family member 1 [Source:HGNC Symbol;Acc:6352]	13	q21.33	-1	70274726	70682591	ENSG00000150361	-	1018	6	984	0	28	94.7	0.59	29.941	7.04e-40	0.414232
Correlated	KLHL13	kelch-like family member 13 [Source:HGNC Symbol;Acc:22931]	X	q24	-1	117031776	117251303	ENSG00000003096	-	1032	12	985	12	23	96	1.16	14.743	2.61e-37	0.397319
Correlated	KLHL2	kelch-like family member 2 [Source:HGNC Symbol;Acc:6353]	4	q32.3	1	166128770	166244308	ENSG00000109466	-	966	8	932	4	22	89.86	0.83	21.467	2.34e-37	0.410947
Correlated	KLHL20	kelch-like family member 20 [Source:HGNC Symbol;Acc:25056]	1	q25.1	1	173684080	173755840	ENSG00000076321	+	963	7	927	7	22	89.58	0.73	16.603	3.65e-25	0.333947
Correlated	KLHL26	kelch-like family member 26 [Source:HGNC Symbol;Acc:25623]	19	p13.11	1	18747775	18781309	ENSG00000167487	-	967	6	934	4	23	89.95	0.62	20.007	2.32e-26	0.341627
Correlated	KLHL29	kelch-like family member 29 [Source:HGNC Symbol;Acc:29404]	2	p24.1	1	23608088	23931481	ENSG00000119771	+	1023	9	975	11	28	95.16	0.88	12.442	1.37e-23	0.312986
Correlated	KLHL32	kelch-like family member 32 [Source:HGNC Symbol;Acc:21221]	6	q16.1	1	97372605	97588630	ENSG00000186231	-	895	5	863	3	24	83.26	0.56	19.289	1.93e-21	0.31784
Correlated	KLHL6	kelch-like family member 6 [Source:HGNC Symbol;Acc:18653]	3	q27.1	-1	183205319	183273477	ENSG00000172578	-	1042	9	1002	3	28	96.93	0.86	21.122	3e-41	0.416728
Correlated	KLHL7	kelch-like family member 7 [Source:HGNC Symbol;Acc:15646]	7	p15.3	1	23145353	23215040	ENSG00000122550	+	1042	8	1000	4	30	96.93	0.77	18.281	1.09e-31	0.362876
Correlated	KLK1	kallikrein 1 [Source:HGNC Symbol;Acc:6357]	19	q13.33	-1	51322404	51327043	ENSG00000167748	-	921	6	891	2	22	85.67	0.65	24.67	1.09e-32	0.392333
Correlated	KLRB1	killer cell lectin-like receptor subfamily B, member 1 [Source:HGNC Symbol;Acc:6373]	12	p13.31	-1	9747147	9760482	ENSG00000111796	-	930	6	896	6	22	86.51	0.65	16.607	9.02e-22	0.31439
Correlated	KLRD1	killer cell lectin-like receptor subfamily D, member 1 [Source:HGNC Symbol;Acc:6378]	12	p13.2	1	10378657	10469850	ENSG00000134539	-	918	6	884	5	23	85.4	0.65	17.266	1.09e-22	0.323544
Correlated	KNTC1	kinetochore associated 1 [Source:HGNC Symbol;Acc:17255]	12	q24.31	1	123011793	123110943	ENSG00000184445	+	975	8	936	7	24	90.7	0.82	16.25	5.64e-28	0.351155
Correlated	KPNA2	karyopherin alpha 2 (RAG cohort 1, importin alpha 1) [Source:HGNC Symbol;Acc:6395]	HG747_PATCH	q24.2	1	66031635	66042958	ENSG00000262472	+	951	9	914	8	20	88.47	0.95	17.361	1.48e-33	0.391468
Correlated	KRAS	Kirsten rat sarcoma viral oncogene homolog [Source:HGNC Symbol;Acc:6407]	12	p12.1	-1	25357723	25403870	ENSG00000133703	+	969	9	926	12	22	90.14	0.93	13.396	1.61e-25	0.335411
Correlated	KRI1	KRI1 homolog (S. cerevisiae) [Source:HGNC Symbol;Acc:25769]	19	p13.2	-1	10663761	10676713	ENSG00000129347	+	988	7	951	2	28	91.91	0.71	21.956	1.02e-33	0.38505
Correlated	KRT10	keratin 10 [Source:HGNC Symbol;Acc:6413]	17	q21.2	-1	38974369	38978847	ENSG00000186395	+	949	5	916	2	26	88.28	0.53	21.866	2.37e-24	0.330544
Correlated	KRT18	keratin 18 [Source:HGNC Symbol;Acc:6430]	12	q13.13	1	53342655	53346685	ENSG00000111057	+	940	10	905	5	20	87.44	1.06	20.889	4.2e-45	0.45986
[truncated: 2,362 more rows]

## Sheet: DLEU2
Target Gene	DLEU2
Target Sign	1
Target Gene LFC >=	1
Gene LFC >=	1
LFC p value <=	0.05
Genes filtered by co-pres >=	10	%
Genes filtered by lift >=	0
Genes filtered by Chi Square p value <=	1
Genes filtered by correlation >=	0.3
Target present in	2260	comparisons
Target modulated in	34	comparisons
type	id_gene_symbol	description	chromosome_name	band	strand	start_position	end_position	id_ensembl	sign	GTpGXp	GTmGXm	GTnGXn	GTnGXm	GTmGXn	copres	coexpr	lift	chi	correlation
Correlated	MARCH4	membrane-associated ring finger (C3HC4) 4, E3 ubiquitin protein ligase [Source:HGNC Symbol;Acc:29269]	2	q35	-1	217122588	217236750	ENSG00000144583	-	1107	7	1077	4	19	48.98	0.63	27.094	1.81e-41	0.405427
Correlated	MARCH6	membrane-associated ring finger (C3HC4) 6, E3 ubiquitin protein ligase [Source:HGNC Symbol;Acc:30550]	5	p15.2	1	10353815	10440500	ENSG00000145495	-	2162	16	2074	54	18	95.66	0.74	14.534	0	0.312941
Correlated	MARCH11	membrane-associated ring finger (C3HC4) 11 [Source:HGNC Symbol;Acc:33609]	5	p15.1	-1	16067248	16180871	ENSG00000183654	-	1061	8	1034	1	18	46.95	0.75	36.274	0	0.517105
Correlated	SEPT2	septin 2 [Source:HGNC Symbol;Acc:7729]	2	q37.3	1	242254515	242293442	ENSG00000168385	+	2254	9	2205	15	25	99.73	0.4	24.86	0	0.306332
Correlated	SEPT3	septin 3 [Source:HGNC Symbol;Acc:10750]	22	q13.2	1	42372276	42394225	ENSG00000100167	-	1111	5	1083	2	21	49.16	0.45	30.522	7.38e-34	0.3639
Correlated	SEPT4	septin 4 [Source:HGNC Symbol;Acc:9165]	17	q22	-1	56597611	56618179	ENSG00000108387	-	2157	11	2101	23	22	95.44	0.51	21.147	0	0.317801
Correlated	SEPT8	septin 8 [Source:HGNC Symbol;Acc:16511]	5	q31.1	-1	132086509	132142933	ENSG00000164402	-	2190	12	2130	26	22	96.9	0.55	20.341	0	0.322741
Correlated	SEPT11	septin 11 [Source:HGNC Symbol;Acc:25589]	4	q21.1	1	77870856	77961537	ENSG00000138758	+	2196	11	2138	24	23	97.17	0.5	20.299	0	0.308004
Correlated	AACS	acetoacetyl-CoA synthetase [Source:HGNC Symbol;Acc:21298]	12	q24.31	1	125549925	125627873	ENSG00000081760	-	1777	11	1735	8	23	78.63	0.62	30.259	0	0.424825
Correlated	AAED1	AhpC/TSA antioxidant enzyme domain containing 1 [UniGene: NA]						unknown	-	1068	6	1035	7	20	47.26	0.56	18.959	7.74e-25	0.314898
Correlated	AASS	aminoadipate-semialdehyde synthase [Source:HGNC Symbol;Acc:17366]	7	q31.32	-1	121715701	121784334	ENSG00000008311	+	2078	10	2029	15	24	91.95	0.48	24.447	0	0.333705
Correlated	ABCA13	ATP-binding cassette, sub-family A (ABC1), member 13 [Source:HGNC Symbol;Acc:14638]	7	p12.3	1	48211055	48687092	ENSG00000179869	+	951	7	914	11	19	42.08	0.74	14.224	2.16e-21	0.307954
Correlated	ABCB10	ATP-binding cassette, sub-family B (MDR/TAP), member 10 [Source:HGNC Symbol;Acc:41]	1	q42.13	-1	229652329	229694442	ENSG00000135776	-	1433	5	1402	5	21	63.41	0.35	27.558	2.18e-30	0.302641
Correlated	ABCB10	ATP-binding cassette, sub-family B (MDR/TAP), member 10 [Source:HGNC Symbol;Acc:41]	1	q42.13	-1	229652329	229694442	ENSG00000135776	+	1433	5	1402	5	21	63.41	0.35	27.558	2.18e-30	0.302641
Correlated	ABCB4	ATP-binding cassette, sub-family B (MDR/TAP), member 4 [Source:HGNC Symbol;Acc:45]	7	q21.12	-1	87031013	87109751	ENSG00000005471	+	2099	6	2061	5	27	92.88	0.29	34.694	1.4e-45	0.309085
Correlated	ABCB9	ATP-binding cassette, sub-family B (MDR/TAP), member 9 [Source:HGNC Symbol;Acc:50]	12	q24.31	-1	123405498	123466196	ENSG00000150967	-	2123	13	2071	19	20	93.94	0.61	26.135	0	0.390722
Correlated	ABCC12	ATP-binding cassette, sub-family C (CFTR/MRP), member 12 [Source:HGNC Symbol;Acc:14640]	16	q12.1	-1	48116884	48189929	ENSG00000140798	-	976	5	950	0	21	43.19	0.51	37.538	7.8e-42	0.433761
Correlated	ABHD12B	abhydrolase domain containing 12B [Source:HGNC Symbol;Acc:19837]	14	q22.1	1	51338878	51371688	ENSG00000131969	-	1088	8	1057	5	18	48.14	0.74	25.751	8.41e-45	0.425886
Correlated	ABHD13	abhydrolase domain containing 13 [Source:HGNC Symbol;Acc:20293]	13	q33.3	1	108870727	108886603	ENSG00000139826	+	1111	6	1081	4	20	49.16	0.54	25.638	8.72e-34	0.363489
Correlated	ABLIM2	actin binding LIM protein family, member 2 [Source:HGNC Symbol;Acc:19195]	4	p16.1	-1	7967039	8160559	ENSG00000163995	-	1134	9	1102	5	18	50.18	0.79	27	0	0.45398
Correlated	ABRACL	ABRA C-terminal like [UniGene: NA]						unknown	+	1112	6	1078	8	20	49.2	0.54	18.33	5.72e-24	0.302778
Correlated	ABRACL	ABRA C-terminal like [UniGene: NA]						unknown	-	1112	5	1082	4	21	49.2	0.45	23.761	2.73e-26	0.31812
Correlated	ACAD10	acyl-CoA dehydrogenase family, member 10 [Source:HGNC Symbol;Acc:21597]	12	q24.12	1	112123857	112194903	ENSG00000111271	+	1898	7	1859	5	27	83.98	0.37	32.564	0	0.340036
Correlated	ACAD9	acyl-CoA dehydrogenase family, member 9 [Source:HGNC Symbol;Acc:21497]	3	q21.3	1	128598439	128634910	ENSG00000177646	+	1138	9	1109	3	17	50.35	0.79	32.827	0	0.502401
Correlated	ACAP2	ArfGAP with coiled-coil, ankyrin repeat and PH domains 2 [Source:HGNC Symbol;Acc:16469]	3	q29	-1	194995465	195163807	ENSG00000114331	+	2091	8	2050	7	26	92.52	0.38	32.8	0	0.347521
Correlated	ACAP3	ArfGAP with coiled-coil, ankyrin repeat and PH domains 3 [Source:HGNC Symbol;Acc:16754]	1	p36.33	-1	1227756	1244989	ENSG00000131584	+	1101	4	1074	1	22	48.72	0.36	33.877	2.12e-30	0.345345
Correlated	ACAT1	acetyl-CoA acetyltransferase 1 [Source:HGNC Symbol;Acc:93]	11	q22.3	1	107992243	108018503	ENSG00000075239	-	2139	14	2078	27	20	94.65	0.65	21.482	0	0.363895
Correlated	ACOT4	acyl-CoA thioesterase 4 [Source:HGNC Symbol;Acc:19748]	14	q24.3	1	74058410	74063200	ENSG00000177465	-	1042	6	1014	2	20	46.11	0.58	30.058	8.97e-40	0.40887
Correlated	ACOT7	acyl-CoA thioesterase 7 [Source:HGNC Symbol;Acc:24157]	1	p36.31	-1	6324333	6454451	ENSG00000097021	-	2122	12	2071	17	22	93.89	0.57	25.826	0	0.372896
Correlated	ACRBP	acrosin binding protein [Source:HGNC Symbol;Acc:17195]	12	p13.31	-1	6747241	6756626	ENSG00000111644	-	1101	5	1074	1	21	48.72	0.45	35.288	3.4e-39	0.394729
Correlated	ACSF3	acyl-CoA synthetase family member 3 [Source:HGNC Symbol;Acc:27288]	16	q24.3	1	89154783	89222254	ENSG00000176715	+	1097	3	1071	0	23	48.54	0.27	42.192	8.79e-29	0.336093
Correlated	ACTL10	actin-like 10 [UniGene: NA]						unknown	-	1038	5	1011	1	21	45.93	0.48	33.269	5.45e-37	0.394385
Correlated	ACTL6B	actin-like 6B [Source:HGNC Symbol;Acc:160]	7	q22.1	-1	100240720	100254084	ENSG00000077080	-	2040	8	1999	8	25	90.27	0.39	30.909	0	0.34099
Correlated	ACTR3B	ARP3 actin-related protein 3 homolog B (yeast) [Source:HGNC Symbol;Acc:17256]	7	q36.1	1	152456834	152552463	ENSG00000133627	-	1855	11	1806	15	23	82.08	0.59	23.083	0	0.359761
Correlated	ACTR3C	ARP3 actin-related protein 3 homolog C (yeast) [Source:HGNC Symbol;Acc:37282]	7	q36.1	-1	149941005	150020814	ENSG00000106526	-	1022	7	992	4	19	45.22	0.68	25.014	2.75e-38	0.404708
Correlated	ACTR8	ARP8 actin-related protein 8 homolog (yeast) [Source:HGNC Symbol;Acc:14672]	3	p21.1	-1	53901093	53916229	ENSG00000113812	+	1896	5	1861	1	29	83.89	0.26	46.471	0	0.346198
Correlated	ACTRT3	actin-related protein T3 [UniGene: NA]						unknown	-	1085	4	1058	1	22	48.01	0.37	33.385	5.72e-30	0.345263
Correlated	ACVR1C	activin A receptor, type IC [Source:HGNC Symbol;Acc:18123]	2	q24.1	-1	158388888	158485517	ENSG00000123612	-	954	10	920	8	16	42.21	1.05	20.385	6.59e-44	0.449954
Correlated	ADAD1	adenosine deaminase domain containing 1 (testis-specific) [Source:HGNC Symbol;Acc:30713]	4	q27	1	123300121	123350957	ENSG00000164113	-	1041	7	1011	4	19	46.06	0.67	25.479	5.34e-39	0.404879
Correlated	ADAM12	ADAM metallopeptidase domain 12 [Source:HGNC Symbol;Acc:190]	10	q26.2	-1	127700950	128077024	ENSG00000148848	+	2217	16	2142	41	18	98.1	0.72	18.303	0	0.350796
Correlated	ADAM1A	ADAM metallopeptidase domain 1A, pseudogene [UniGene: Transcribed locus, moderately similar to XP_002804992.1 PREDICTED: disintegr...]						unknown	+	919	5	889	4	21	40.66	0.54	19.637	9.06e-22	0.316251
Correlated	ADAM22	ADAM metallopeptidase domain 22 [Source:HGNC Symbol;Acc:201]	7	q21.12	1	87563458	87832204	ENSG00000008277	+	2221	10	2168	20	23	98.27	0.45	22.434	0	0.308023
Correlated	ADAM32	ADAM metallopeptidase domain 32 [Source:HGNC Symbol;Acc:15479]	8	p11.22	1	38964509	39142430	ENSG00000197140	-	941	3	915	0	23	41.64	0.32	36.192	7.7e-25	0.335493
Correlated	ADAMTS14	ADAM metallopeptidase with thrombospondin type 1 motif, 14 [Source:HGNC Symbol;Acc:14899]	10	q22.1	1	72432559	72522197	ENSG00000138316	-	1057	4	1030	1	22	46.77	0.38	32.523	3.25e-29	0.345114
Correlated	ADAMTS18	ADAM metallopeptidase with thrombospondin type 1 motif, 18 [Source:HGNC Symbol;Acc:17110]	16	q23.1	-1	77281710	77469011	ENSG00000140873	-	1081	6	1047	8	20	47.83	0.56	17.819	2.69e-23	0.302436
Correlated	ADAMTS18	ADAM metallopeptidase with thrombospondin type 1 motif, 18 [Source:HGNC Symbol;Acc:17110]	16	q23.1	-1	77281710	77469011	ENSG00000140873	+	1081	7	1055	0	19	47.83	0.65	41.577	0	0.514264
Correlated	ADAMTS5	ADAM metallopeptidase with thrombospondin type 1 motif, 5 [Source:HGNC Symbol;Acc:221]	21	q21.3	-1	28290231	28338832	ENSG00000154736	+	1938	10	1884	20	24	85.75	0.52	19	3.11e-40	0.301613
Correlated	ADAMTS6	ADAM metallopeptidase with thrombospondin type 1 motif, 6 [Source:HGNC Symbol;Acc:222]	5	q12.3	-1	64444563	64777747	ENSG00000049192	+	1951	11	1904	14	22	86.33	0.56	26.013	0	0.373806
Correlated	ADAMTS8	ADAM metallopeptidase with thrombospondin type 1 motif, 8 [Source:HGNC Symbol;Acc:224]	11	q24.3	-1	130274820	130298888	ENSG00000134917	-	1904	13	1853	17	21	84.25	0.68	24.267	0	0.396943
Correlated	ADAMTSL1	ADAMTS-like 1 [Source:HGNC Symbol;Acc:14632]	9	p22.2	1	18473892	18910948	ENSG00000178031	+	1085	9	1053	6	17	48.01	0.83	25.038	0	0.445963
Correlated	ADAMTSL1	ADAMTS-like 1 [Source:HGNC Symbol;Acc:14632]	9	p22.2	1	18473892	18910948	ENSG00000178031	-	1085	7	1049	10	19	48.01	0.65	17.183	5.77e-26	0.319922
Correlated	ADAP1	ArfGAP with dual PH domains 1 [Source:HGNC Symbol;Acc:16486]	7	p22.3	-1	937540	995043	ENSG00000105963	-	1847	10	1793	20	24	81.73	0.54	18.108	2.76e-38	0.301036
Correlated	ADAT3	adenosine deaminase, tRNA-specific 3 [Source:HGNC Symbol;Acc:25151]	19	p13.3	1	1905377	1913444	ENSG00000213638	+	1087	4	1060	1	22	48.1	0.37	33.446	5.05e-30	0.345274
Correlated	ADC	arginine decarboxylase [Source:HGNC Symbol;Acc:29957]	1	p35.1	1	33546705	33586131	ENSG00000142920	-	1084	4	1056	2	22	47.96	0.37	27.795	5.87e-25	0.313373
Correlated	ADCY1	adenylate cyclase 1 (brain) [Source:HGNC Symbol;Acc:232]	7	p12.3	1	45613739	45762715	ENSG00000164742	-	2153	14	2097	23	19	95.27	0.65	24.686	0	0.390778
Correlated	ADCY2	adenylate cyclase 2 (brain) [Source:HGNC Symbol;Acc:233]	5	p15.31	1	7396321	7830194	ENSG00000078295	-	1992	12	1935	24	21	88.14	0.6	20.121	0	0.336684
Correlated	ADCY5	adenylate cyclase 5 [Source:HGNC Symbol;Acc:236]	3	q21.1	-1	123001143	123168605	ENSG00000173175	-	1070	5	1041	3	21	47.35	0.47	25.721	1.64e-28	0.338601
Correlated	ADCY5	adenylate cyclase 5 [Source:HGNC Symbol;Acc:236]	3	q21.1	-1	123001143	123168605	ENSG00000173175	+	1070	5	1039	5	21	47.35	0.47	20.577	9.64e-23	0.300074
Correlated	ADD2	adducin 2 (beta) [Source:HGNC Symbol;Acc:244]	HG953_PATCH	p13.3	-1	70834750	70995357	ENSG00000271760	+	2244	12	2191	19	22	99.29	0.53	25.548	0	0.360376
Correlated	ADH4	alcohol dehydrogenase 4 (class II), pi polypeptide [Source:HGNC Symbol;Acc:252]	4	q23	-1	100044808	100078949	ENSG00000198099	+	1098	7	1068	4	19	48.58	0.64	26.874	3.93e-41	0.405356
Correlated	ADTRP	androgen-dependent TFPI-regulating protein [UniGene: NA]						unknown	-	2113	9	2068	11	25	93.5	0.43	27.966	0	0.337102
Correlated	AEBP2	AE binding protein 2 [Source:HGNC Symbol;Acc:24051]	12	p12.3	1	19556979	19873735	ENSG00000139154	-	1135	7	1109	0	19	50.22	0.62	43.654	0	0.514486
Correlated	AEBP2	AE binding protein 2 [Source:HGNC Symbol;Acc:24051]	12	p12.3	1	19556979	19873735	ENSG00000139154	+	1135	4	1108	1	22	50.22	0.35	34.923	2.57e-31	0.345511
Correlated	AFAP1-AS1	AFAP1 antisense RNA 1 [UniGene: NA]						unknown	-	936	4	909	1	22	41.42	0.43	28.8	5.92e-26	0.344367
Correlated	AFF3	AF4/FMR2 family, member 3 [Source:HGNC Symbol;Acc:6473]	2	q11.2	-1	100163718	100759201	ENSG00000144218	-	2203	13	2133	37	20	97.48	0.59	17.357	0	0.307392
Correlated	AFF4	AF4/FMR2 family, member 4 [Source:HGNC Symbol;Acc:17869]	5	q31.1	-1	132211071	132299326	ENSG00000072364	-	1954	12	1903	17	22	86.46	0.61	23.781	0	0.372087
Correlated	AFG3L1P	AFG3 ATPase family member 3-like 1 (S. cerevisiae), pseudogene [Source:HGNC Symbol;Acc:314]	16	q24.3	1	90038994	90068569	ENSG00000223959	+	1127	4	1100	1	22	49.87	0.35	34.677	4.23e-31	0.345473
Correlated	AFMID	arylformamidase [Source:HGNC Symbol;Acc:20910]	17	q25.3	1	76183398	76203782	ENSG00000183077	+	1051	4	1024	1	22	46.5	0.38	32.338	4.71e-29	0.345081
Correlated	AGAP2	ArfGAP with GTPase domain, ankyrin repeat and PH domain 2 [Source:HGNC Symbol;Acc:16921]	12	q14.1	-1	58118980	58135940	ENSG00000135439	-	2135	7	2096	6	26	94.47	0.33	34.837	0	0.33184
Correlated	AGAP2-AS1	AGAP2 antisense RNA 1 [UniGene: NA]						unknown	+	818	4	791	1	22	36.19	0.49	25.169	9.05e-23	0.343421
Correlated	AGAP3	ArfGAP with GTPase domain, ankyrin repeat and PH domain 3 [Source:HGNC Symbol;Acc:16923]	7	q36.1	1	150782918	150841523	ENSG00000133612	-	1122	10	1087	9	16	49.65	0.89	22.713	0	0.438916
Correlated	AGGF1	angiogenic factor with G patch and FHA domains 1 [Source:HGNC Symbol;Acc:24684]	5	q13.3	1	76325076	76361059	ENSG00000164252	+	2181	8	2139	8	26	96.5	0.37	32.074	0	0.336159
Correlated	AGO4	argonaute RISC catalytic component 4 [UniGene: NA]						unknown	+	1860	7	1818	8	27	82.3	0.38	25.529	9.91e-39	0.301803
Correlated	AGPAT4	1-acylglycerol-3-phosphate O-acyltransferase 4 [Source:HGNC Symbol;Acc:20885]	6	q26	-1	161551011	161695093	ENSG00000026652	-	1913	11	1866	14	22	84.65	0.58	25.507	0	0.373621
Correlated	AGPAT6	1-acylglycerol-3-phosphate O-acyltransferase 6 [Source:HGNC Symbol;Acc:20880]	8	p11.21	1	41434706	41482520	ENSG00000158669	+	1090	6	1060	4	20	48.23	0.55	25.154	3.77e-33	0.363321
Correlated	AGPAT9	1-acylglycerol-3-phosphate O-acyltransferase 9 [Source:HGNC Symbol;Acc:28157]	4	q21.23	1	84457067	84527028	ENSG00000138678	-	1092	12	1042	24	14	48.32	1.1	14	3.06e-35	0.374861
Correlated	AHDC1	AT hook, DNA binding motif, containing 1 [Source:HGNC Symbol;Acc:25230]	1	p36.11	-1	27860546	27930942	ENSG00000126705	+	2171	8	2130	8	25	96.06	0.37	32.894	0	0.341427
Correlated	AIFM3	apoptosis-inducing factor, mitochondrion-associated, 3 [Source:HGNC Symbol;Acc:26398]	22	q11.21	1	21319396	21335649	ENSG00000183773	-	1073	8	1046	1	18	47.48	0.75	36.684	0	0.517171
Correlated	AJUBA	ajuba LIM protein [UniGene: NA]						unknown	+	1118	9	1082	10	17	49.47	0.81	20.368	1.96e-39	0.392959
Correlated	AK5	adenylate kinase 5 [Source:HGNC Symbol;Acc:365]	1	p31.1	1	77747736	78025651	ENSG00000154027	-	1929	10	1877	19	23	85.35	0.52	20.157	8.44e-43	0.312235
Correlated	AK7	adenylate kinase 7 [Source:HGNC Symbol;Acc:20091]	14	q32.2	1	96858448	96955764	ENSG00000140057	-	1090	6	1060	4	20	48.23	0.55	25.154	3.77e-33	0.363321
Correlated	AK8	adenylate kinase 8 [Source:HGNC Symbol;Acc:26526]	9	q34.13	-1	135600965	135754164	ENSG00000165695	-	1078	4	1050	2	22	47.7	0.37	27.641	8.01e-25	0.313334
Correlated	AK9	adenylate kinase 9 [UniGene: NA]						unknown	-	1082	6	1055	1	20	47.88	0.55	35.67	0	0.438993
Correlated	AKAP13	A kinase (PRKA) anchor protein 13 [Source:HGNC Symbol;Acc:371]	15	q25.3	1	85923802	86292586	ENSG00000170776	+	2185	13	2118	33	21	96.68	0.59	18.162	0	0.316413
Correlated	AKAP5	A kinase (PRKA) anchor protein 5 [Source:HGNC Symbol;Acc:375]	14	q23.3	1	64932217	64936425	ENSG00000179841	-	2171	8	2128	10	25	96.06	0.37	29.239	0	0.320788
Correlated	AKT1S1	AKT1 substrate 1 (proline-rich) [Source:HGNC Symbol;Acc:28426]	19	q13.33	-1	50372295	50381716	ENSG00000204673	-	1110	5	1083	1	21	49.12	0.45	35.577	1.64e-39	0.394775
Correlated	ALDH16A1	aldehyde dehydrogenase 16 family, member A1 [Source:HGNC Symbol;Acc:28114]	19	q13.33	1	49956426	49974305	ENSG00000161618	+	1113	5	1085	2	21	49.25	0.45	30.577	6.43e-34	0.363912
Correlated	ALG14	ALG14, UDP-N-acetylglucosaminyltransferase subunit [Source:HGNC Symbol;Acc:28287]	1	p21.3	-1	95448297	95538501	ENSG00000172339	-	1094	6	1064	4	20	48.41	0.55	25.246	2.85e-33	0.363353
Correlated	ALG5	ALG5, dolichyl-phosphate beta-glucosyltransferase [Source:HGNC Symbol;Acc:20266]	13	q13.3	-1	37523912	37574398	ENSG00000120697	+	1939	6	1901	4	28	85.8	0.31	34.218	5.61e-45	0.319518
Correlated	ALKBH8	alkB, alkylation repair homolog 8 (E. coli) [Source:HGNC Symbol;Acc:25189]	11	q22.3	-1	107373452	107436472	ENSG00000137760	+	1116	7	1089	1	19	49.38	0.63	37.558	0	0.479764
Correlated	ALPK3	alpha-kinase 3 [Source:HGNC Symbol;Acc:17574]	15	q25.3	1	85359911	85416713	ENSG00000136383	+	2145	9	2104	8	24	94.91	0.42	34.412	0	0.373291
Correlated	ALS2CR11	amyotrophic lateral sclerosis 2 (juvenile) chromosome region, candidate 11 [Source:HGNC Symbol;Acc:14438]	2	q33.1	-1	202352148	202483901	ENSG00000155754	-	1004	5	977	1	21	44.42	0.5	32.179	8.46e-36	0.394182
Correlated	ALS2CR12	amyotrophic lateral sclerosis 2 (juvenile) chromosome region, candidate 12 [Source:HGNC Symbol;Acc:14439]	2	q33.1	-1	202152994	202222121	ENSG00000155749	+	1098	5	1072	0	21	48.58	0.46	42.231	0	0.434296
Correlated	AMER2	APC membrane recruitment protein 2 [UniGene: NA]						unknown	-	1094	4	1066	2	22	48.41	0.37	28.051	3.5e-25	0.313437
Correlated	AMER3	APC membrane recruitment protein 3 [UniGene: NA]						unknown	-	1051	7	1018	7	19	46.5	0.67	20.212	9.8e-31	0.355518
Correlated	AMH	anti-Mullerian hormone [Source:HGNC Symbol;Acc:464]	19	p13.3	1	2248666	2252072	ENSG00000104899	+	2018	8	1976	9	25	89.29	0.4	28.777	0	0.330115
Correlated	AMIGO1	adhesion molecule with Ig-like domain 1 [Source:HGNC Symbol;Acc:20824]	1	p13.3	-1	110046797	110052360	ENSG00000181754	-	1108	6	1078	4	20	49.03	0.54	25.569	1.07e-33	0.363466
Correlated	AMN1	antagonist of mitotic exit network 1 homolog (S. cerevisiae) [Source:HGNC Symbol;Acc:27281]	12	p11.21	-1	31824071	31882108	ENSG00000151743	-	945	9	916	3	17	41.81	0.95	27.26	0	0.500919
Correlated	AMOTL1	angiomotin like 1 [Source:HGNC Symbol;Acc:17811]	11	q21	1	94439597	94609918	ENSG00000166025	+	1128	7	1096	6	19	49.91	0.62	23.361	1.3e-35	0.370869
Correlated	AMZ2P1	archaelysin family metallopeptidase 2 pseudogene 1 [Source:HGNC Symbol;Acc:26491]	17	q24.1	-1	62962668	62971694	ENSG00000214174	-	1048	4	1020	2	22	46.37	0.38	26.872	3.78e-24	0.313134
Correlated	ANAPC7	anaphase promoting complex subunit 7 [Source:HGNC Symbol;Acc:17380]	12	q24.11	-1	110810705	110841535	ENSG00000196510	-	1139	5	1108	5	21	50.4	0.44	21.904	3.38e-24	0.30069
Correlated	ANGPT2	angiopoietin 2 [Source:HGNC Symbol;Acc:485]	8	p23.1	-1	6357172	6420930	ENSG00000091879	+	2222	12	2160	28	22	98.32	0.54	19.606	0	0.314028
Correlated	ANGPTL1	angiopoietin-like 1 [Source:HGNC Symbol;Acc:489]	1	q25.2	-1	178818840	178840187	ENSG00000116194	-	1112	8	1072	14	18	49.2	0.72	15.552	1.45e-26	0.319894
Correlated	ANKDD1A	ankyrin repeat and death domain containing 1A [Source:HGNC Symbol;Acc:28002]	15	q22.31	1	65204101	65251042	ENSG00000166839	-	1101	5	1070	5	21	48.72	0.45	21.173	2.14e-23	0.30036
Correlated	ANKFN1	ankyrin-repeat and fibronectin type III domain containing 1 [Source:HGNC Symbol;Acc:26766]	17	q22	1	54188319	54589020	ENSG00000153930	+	946	8	919	1	18	41.86	0.85	32.342	0	0.51638
Correlated	ANKFY1	ankyrin repeat and FYVE domain containing 1 [Source:HGNC Symbol;Acc:20763]	17	p13.2	-1	4067201	4167274	ENSG00000185722	+	1882	8	1845	4	25	83.27	0.43	38.02	0	0.396184
Correlated	ANKH	ANKH inorganic pyrophosphate transport regulator [Source:HGNC Symbol;Acc:15492]	5	p15.2	-1	14704910	14871887	ENSG00000154122	-	1929	14	1863	32	20	85.35	0.73	17.267	0	0.340567
Correlated	ANKIB1	ankyrin repeat and IBR domain containing 1 [Source:HGNC Symbol;Acc:22215]	7	q21.2	1	91875548	92030698	ENSG00000001629	-	1119	7	1091	2	19	49.51	0.63	33.474	0	0.451
Correlated	ANKLE1	ankyrin repeat and LEM domain containing 1 [Source:HGNC Symbol;Acc:26812]	19	p13.11	1	17392454	17398455	ENSG00000160117	-	849	3	823	0	23	37.57	0.35	32.654	1.64e-22	0.335034
Correlated	ANKRD13C	ankyrin repeat domain 13C [Source:HGNC Symbol;Acc:25374]	1	p31.1	-1	70726271	70820417	ENSG00000118454	+	1109	6	1077	6	20	49.07	0.54	21.327	5.34e-28	0.329406
Correlated	ANKRD18A	ankyrin repeat domain 18A [Source:HGNC Symbol;Acc:23643]	9	p13.1	-1	38540564	38620657	ENSG00000180071	-	1054	7	1023	5	19	46.64	0.66	23.647	4.06e-36	0.386515
Correlated	ANKRD20A1	ankyrin repeat domain 20 family, member A1 [Source:HGNC Symbol;Acc:23665]	9	q13	1	67926761	67969840	ENSG00000196774	+	1070	6	1040	4	20	47.35	0.56	24.692	1.52e-32	0.363154
Correlated	ANKRD24	ankyrin repeat domain 24 [Source:HGNC Symbol;Acc:29424]	19	p13.3	1	4183351	4224811	ENSG00000089847	-	1059	6	1031	2	20	46.86	0.57	30.548	2.04e-40	0.408987
Correlated	ANKRD26	ankyrin repeat domain 26 [Source:HGNC Symbol;Acc:29186]	10	p12.1	-1	27280843	27389421	ENSG00000107890	+	2073	6	2036	4	27	91.73	0.29	37.691	0	0.324901
Correlated	ANKRD29	ankyrin repeat domain 29 [Source:HGNC Symbol;Acc:27110]	18	q11.2	-1	21178890	21242849	ENSG00000154065	-	1108	14	1060	22	12	49.03	1.26	16.573	0	0.442374
Correlated	ANKRD30B	ankyrin repeat domain 30B [Source:HGNC Symbol;Acc:24165]	18	p11.21	1	14728271	14852737	ENSG00000180777	-	920	4	892	2	22	40.71	0.43	23.59	2.87e-21	0.312127
Correlated	ANKRD32	ankyrin repeat domain 32 [Source:HGNC Symbol;Acc:25408]	5	q15	1	93954052	94075141	ENSG00000133302	-	1118	9	1084	8	17	49.47	0.81	22.765	2.94e-44	0.41731
Correlated	ANKRD33B	ankyrin repeat domain 33B [Source:HGNC Symbol;Acc:35240]	5	p15.2	1	10564442	10650308	ENSG00000164236	-	1103	7	1073	4	19	48.81	0.63	26.997	2.56e-41	0.405395
Correlated	ANKRD34A	ankyrin repeat domain 34A [Source:HGNC Symbol;Acc:27639]	1	q21.1	1	145470508	145475646	ENSG00000181039	-	1097	6	1066	5	20	48.54	0.55	23.014	2.85e-30	0.345201
Correlated	ANKRD35	ankyrin repeat domain 35 [Source:HGNC Symbol;Acc:26323]	HG1287_PATCH	q21.1	-1	146552975	146572260	ENSG00000263773	-	1087	6	1054	7	20	48.1	0.55	19.296	2.79e-25	0.315102
Correlated	ANKRD36BP2	ankyrin repeat domain 36B pseudogene 2 [Source:HGNC Symbol;Acc:33607]	2	p11.2	1	89065324	89106126	ENSG00000230006	-	1608	7	1567	8	26	71.15	0.44	22.739	1.8e-34	0.305353
Correlated	ANKRD39	ankyrin repeat domain 39 [Source:HGNC Symbol;Acc:28640]	2	q11.2	-1	97502348	97523832	ENSG00000213337	+	1124	3	1098	0	23	49.73	0.27	43.231	1.83e-29	0.33618
Correlated	ANKRD44	ankyrin repeat domain 44 [Source:HGNC Symbol;Acc:25259]	2	q33.1	-1	197831741	198175897	ENSG00000065413	+	1131	8	1096	9	18	50.04	0.71	20.471	2.37e-35	0.368949
Correlated	ANKRD45	ankyrin repeat domain 45 [Source:HGNC Symbol;Acc:24786]	1	q25.1	-1	173578700	173639001	ENSG00000183831	-	1070	4	1043	0	23	47.35	0.37	39.63	1.33e-35	0.380725
Correlated	ANKRD65	ankyrin repeat domain 65 [UniGene: NA]						unknown	-	937	6	909	2	20	41.46	0.64	27.029	8.38e-36	0.408056
Correlated	ANKS1B	ankyrin repeat and sterile alpha motif domain containing 1B [Source:HGNC Symbol;Acc:24600]	12	q23.1	-1	99120235	100378432	ENSG00000185046	-	1869	11	1824	12	22	82.7	0.59	27.087	0	0.390384
Correlated	ANKZF1	ankyrin repeat and zinc finger domain containing 1 [Source:HGNC Symbol;Acc:25527]	2	q35	1	220094479	220101391	ENSG00000163516	+	1759	10	1717	8	24	77.83	0.57	28.742	0	0.39602
Correlated	ANLN	anillin, actin binding protein [Source:HGNC Symbol;Acc:14082]	7	p14.2	1	36429415	36493400	ENSG00000011426	-	1116	12	1062	28	14	49.38	1.08	12.877	3.27e-32	0.353672
Correlated	ANO4	anoctamin 4 [Source:HGNC Symbol;Acc:23837]	HSCHR12_3_CTG2_1	q23.1	1	101505377	101522419	ENSG00000262139	-	1063	7	1029	8	19	47.04	0.66	19.079	5.95e-29	0.34249
Correlated	ANO5	anoctamin 5 [Source:HGNC Symbol;Acc:27337]	11	p14.3	1	22214722	22304903	ENSG00000171714	-	1054	10	1021	7	16	46.64	0.95	23.846	0	0.465198
Correlated	ANO6	anoctamin 6 [Source:HGNC Symbol;Acc:25240]	12	q12	1	45609770	45834187	ENSG00000177119	+	1075	6	1045	4	20	47.57	0.56	24.808	1.07e-32	0.363196
Correlated	ANTXR1	anthrax toxin receptor 1 [Source:HGNC Symbol;Acc:21014]	2	p13.3	1	69240310	69476459	ENSG00000169604	-	1851	11	1793	24	23	81.9	0.59	17.11	1.44e-39	0.30594
Correlated	ANTXR2	anthrax toxin receptor 2 [Source:HGNC Symbol;Acc:21732]	4	q21.21	-1	80822303	81046608	ENSG00000163297	+	1121	12	1074	21	14	49.6	1.07	15.678	1.02e-39	0.393911
Correlated	ANXA11	annexin A11 [Source:HGNC Symbol;Acc:535]	10	q22.3	-1	81910645	81965328	ENSG00000122359	-	2249	12	2184	31	22	99.51	0.53	18.46	0	0.302009
Correlated	ANXA2	annexin A2 [Source:HGNC Symbol;Acc:537]	15	q22.2	-1	60639333	60695082	ENSG00000182718	+	2098	14	2020	44	20	92.83	0.67	14.895	3.7e-43	0.300696
Correlated	ANXA2P2	annexin A2 pseudogene 2 [Source:HGNC Symbol;Acc:539]	9	p13.3	1	33624223	33625532	ENSG00000231991	+	1578	8	1534	10	26	69.82	0.51	20.627	1.84e-35	0.312863
Correlated	ANXA8L1	annexin A8-like 1 [Source:HGNC Symbol;Acc:23334]	10	q11.22	-1	47157983	47174093	ENSG00000150165	+	824	7	795	3	19	36.46	0.85	22.185	4.7e-34	0.423832
Correlated	AP1S2	adaptor-related protein complex 1, sigma 2 subunit [Source:HGNC Symbol;Acc:560]	X	p22.2	-1	15843929	15873054	ENSG00000182287	+	2250	14	2186	30	20	99.56	0.62	21.056	0	0.350853
Correlated	AP1S3	adaptor-related protein complex 1, sigma 3 subunit [Source:HGNC Symbol;Acc:18971]	2	q36.1	-1	224616403	224702744	ENSG00000152056	-	1099	11	1067	6	15	48.63	1	27.351	0	0.51415
Correlated	AP3B1	adaptor-related protein complex 3, beta 1 subunit [Source:HGNC Symbol;Acc:566]	5	q14.1	-1	77296349	77590579	ENSG00000132842	-	2147	7	2105	8	27	95	0.33	29.469	9.81e-45	0.302906
Correlated	AP3M2	adaptor-related protein complex 3, mu 2 subunit [Source:HGNC Symbol;Acc:570]	8	p11.21	1	42010464	42029191	ENSG00000070718	-	2149	9	2102	13	25	95.09	0.42	25.857	0	0.320523
Correlated	APAF1	apoptotic peptidase activating factor 1 [Source:HGNC Symbol;Acc:576]	12	q23.1	1	99038919	99129204	ENSG00000120868	+	2139	7	2098	7	27	94.65	0.33	31.456	0	0.314173
Correlated	APH1B	APH1B gamma secretase subunit [Source:HGNC Symbol;Acc:24080]	15	q22.2	1	63568217	63601325	ENSG00000138613	-	1873	8	1830	9	26	82.88	0.43	25.924	9.81e-45	0.324339
Correlated	API5	apoptosis inhibitor 5 [Source:HGNC Symbol;Acc:594]	11	p12	1	43333513	43366079	ENSG00000166181	+	2248	8	2204	10	26	99.47	0.36	29.386	0	0.316033
Correlated	APLF	aprataxin and PNKP like factor [Source:HGNC Symbol;Acc:28724]	2	p13.3	1	68694693	68858004	ENSG00000169621	+	1051	4	1025	0	22	46.5	0.38	40.423	2.67e-36	0.38809
Correlated	APLN	apelin [Source:HGNC Symbol;Acc:16665]	X	q26.1	-1	128779240	128788933	ENSG00000171388	+	1113	5	1086	1	21	49.25	0.45	35.673	1.29e-39	0.39479
Correlated	APLN	apelin [Source:HGNC Symbol;Acc:16665]	X	q26.1	-1	128779240	128788933	ENSG00000171388	-	1113	6	1082	5	20	49.25	0.54	23.35	1.03e-30	0.345341
Correlated	APLNR	apelin receptor [Source:HGNC Symbol;Acc:339]	11	q12.1	-1	57001051	57004709	ENSG00000134817	+	2104	8	2062	9	25	93.1	0.38	30.004	0	0.330432
Correlated	APOA5	apolipoprotein A-V [Source:HGNC Symbol;Acc:17288]	11	q23.3	-1	116660083	116663136	ENSG00000110243	-	1085	4	1059	0	22	48.01	0.37	41.731	1.92e-37	0.38822
Correlated	APOL4	apolipoprotein L, 4 [Source:HGNC Symbol;Acc:14867]	22	q12.3	-1	36585172	36600886	ENSG00000100336	+	1086	9	1052	8	17	48.05	0.83	22.113	5.72e-43	0.416986
Correlated	ARAP1	ArfGAP with RhoGAP domain, ankyrin repeat and PH domain 1 [Source:HGNC Symbol;Acc:16925]	11	q13.4	-1	72396114	72504644	ENSG00000186635	+	2188	7	2147	7	27	96.81	0.32	32.176	0	0.314324
Correlated	ARF3	ADP-ribosylation factor 3 [Source:HGNC Symbol;Acc:654]	12	q13.12	-1	49297286	49351334	ENSG00000134287	-	2236	11	2180	22	23	98.94	0.49	21.922	0	0.318181
Correlated	ARGLU1	arginine and glutamate rich 1 [Source:HGNC Symbol;Acc:25482]	13	q33.3	-1	107194021	107220512	ENSG00000134884	-	1890	12	1835	21	22	83.63	0.63	20.214	0	0.346671
Correlated	ARHGAP18	Rho GTPase activating protein 18 [Source:HGNC Symbol;Acc:21035]	6	q22.33	-1	129897277	130031370	ENSG00000146376	+	1111	8	1076	9	18	49.16	0.72	20.109	1.02e-34	0.368737
Correlated	ARHGAP18	Rho GTPase activating protein 18 [Source:HGNC Symbol;Acc:21035]	6	q22.33	-1	129897277	130031370	ENSG00000146376	-	1111	10	1061	24	16	49.16	0.9	12.568	2.82e-26	0.318168
Correlated	ARHGAP20	Rho GTPase activating protein 20 [Source:HGNC Symbol;Acc:18357]	11	q23.1	-1	110447766	110583912	ENSG00000137727	-	1106	9	1070	10	17	48.94	0.81	20.15	5.28e-39	0.392827
Correlated	ARHGAP30	Rho GTPase activating protein 30 [Source:HGNC Symbol;Acc:27414]	1	q23.3	-1	161016736	161039760	ENSG00000186517	+	1075	6	1041	8	20	47.57	0.56	17.72	3.63e-23	0.302368
Correlated	ARHGAP39	Rho GTPase activating protein 39 [Source:HGNC Symbol;Acc:29351]	8	q24.3	-1	145754563	145911194	ENSG00000147799	-	1094	4	1067	1	22	48.41	0.37	33.662	3.27e-30	0.34531
Correlated	ARHGAP39	Rho GTPase activating protein 39 [Source:HGNC Symbol;Acc:29351]	8	q24.3	-1	145754563	145911194	ENSG00000147799	+	1094	4	1067	1	22	48.41	0.37	33.662	3.27e-30	0.34531
Correlated	ARHGAP42	Rho GTPase activating protein 42 [Source:HGNC Symbol;Acc:26545]	11	q22.1	1	100558384	100862668	ENSG00000165895	+	1112	9	1077	9	17	49.2	0.81	21.385	1.76e-41	0.404578
Correlated	ARHGAP44	Rho GTPase activating protein 44 [Source:HGNC Symbol;Acc:29096]	17	p12	1	12692856	12894960	ENSG00000006740	-	2072	10	2018	20	24	91.68	0.48	20.314	4.22e-43	0.302368
Correlated	ARHGDIG	Rho GDP dissociation inhibitor (GDI) gamma [Source:HGNC Symbol;Acc:680]	16	p13.3	1	318726	333003	ENSG00000242173	-	1823	7	1785	5	26	80.66	0.38	32.225	0	0.345113
Correlated	ARHGEF12	Rho guanine nucleotide exchange factor (GEF) 12 [Source:HGNC Symbol;Acc:14193]	11	q23.3	1	120207787	120360645	ENSG00000196914	+	2192	11	2134	24	23	96.99	0.5	20.262	0	0.307984
Correlated	ARHGEF26	Rho guanine nucleotide exchange factor (GEF) 26 [Source:HGNC Symbol;Acc:24490]	3	q25.2	1	153838792	153975616	ENSG00000114790	-	1856	11	1808	15	22	82.12	0.59	23.795	0	0.365563
Correlated	ARHGEF37	Rho guanine nucleotide exchange factor (GEF) 37 [Source:HGNC Symbol;Acc:34430]	5	q32	1	148931510	149014531	ENSG00000183111	-	1080	5	1049	5	21	47.79	0.46	20.769	5.93e-23	0.300168
Correlated	ARHGEF40	Rho guanine nucleotide exchange factor (GEF) 40 [Source:HGNC Symbol;Acc:25516]	14	q11.2	1	21538429	21558399	ENSG00000165801	+	1887	18	1835	18	16	83.5	0.95	27.75	0	0.505328
Correlated	ARID1A	AT rich interactive domain 1A (SWI-like) [Source:HGNC Symbol;Acc:11110]	1	p36.11	1	27022524	27108595	ENSG00000117713	-	2138	10	2089	15	24	94.6	0.47	25.153	0	0.33397
Correlated	ARID1B	AT rich interactive domain 1B (SWI1-like) [Source:HGNC Symbol;Acc:18040]	6	q25.3	1	157099063	157531913	ENSG00000049618	+	1115	3	1089	0	23	49.34	0.27	42.885	3.09e-29	0.336152
Correlated	ARID1B	AT rich interactive domain 1B (SWI1-like) [Source:HGNC Symbol;Acc:18040]	6	q25.3	1	157099063	157531913	ENSG00000049618	-	1115	7	1083	6	19	49.34	0.63	23.092	3.35e-35	0.370752
Correlated	ARID2	AT rich interactive domain 2 (ARID, RFX-like) [Source:HGNC Symbol;Acc:18037]	12	q12	1	46123448	46301823	ENSG00000189079	-	1135	6	1103	6	20	50.22	0.53	21.827	1.18e-28	0.329645
Correlated	ARL10	ADP-ribosylation factor-like 10 [Source:HGNC Symbol;Acc:22042]	5	q35.2	1	175792471	175828866	ENSG00000175414	+	1056	6	1030	0	20	46.73	0.57	40.615	0	0.475787
Correlated	ARL13B	ADP-ribosylation factor-like 13B [Source:HGNC Symbol;Acc:25419]	3	q11.1	1	93698983	93774512	ENSG00000169379	-	1063	5	1037	0	21	47.04	0.47	40.885	1.4e-45	0.434155
Correlated	ARL16	ADP-ribosylation factor-like 16 [Source:HGNC Symbol;Acc:27902]	17	q25.3	-1	79648204	79650954	ENSG00000214087	+	944	3	918	0	23	41.77	0.32	36.308	6.46e-25	0.335506
Correlated	ARL17A	ADP-ribosylation factor-like 17A [Source:HGNC Symbol;Acc:24096]	17	q21.31	-1	44594068	44657088	ENSG00000185829	+	1847	11	1802	11	23	81.73	0.6	27.162	0	0.393358
Correlated	ARL6	ADP-ribosylation factor-like 6 [Source:HGNC Symbol;Acc:13210]	3	q11.2	1	97483365	97519953	ENSG00000113966	-	1092	7	1064	2	19	48.32	0.64	32.667	0	0.450835
Correlated	ARL6IP4	ADP-ribosylation-like factor 6 interacting protein 4 [Source:HGNC Symbol;Acc:18076]	12	q24.31	1	123464333	123467456	ENSG00000182196	+	1745	4	1710	1	30	77.21	0.23	41.059	1.19e-36	0.302707
Correlated	ARL9	ADP-ribosylation factor-like 9 [Source:HGNC Symbol;Acc:23592]	4	q12	1	57371509	57390614	ENSG00000196503	-	1043	5	1016	1	21	46.15	0.48	33.429	3.64e-37	0.394414
Correlated	ARMC2	armadillo repeat containing 2 [Source:HGNC Symbol;Acc:23045]	6	q21	1	109169619	109295186	ENSG00000118690	-	1101	4	1074	1	22	48.72	0.36	33.877	2.12e-30	0.345345
Correlated	ARMC8	armadillo repeat containing 8 [Source:HGNC Symbol;Acc:24999]	3	q22.3	1	137906109	138017231	ENSG00000114098	+	2177	14	2121	22	20	96.33	0.64	24.9	0	0.390369
Correlated	ARMCX5	armadillo repeat containing, X-linked 5 [Source:HGNC Symbol;Acc:25772]	X	q22.1	1	101854096	101859087	ENSG00000125962	+	1784	4	1749	1	30	78.94	0.22	41.976	1.88e-37	0.302797
Correlated	ARPC5L	actin related protein 2/3 complex, subunit 5-like [Source:HGNC Symbol;Acc:23366]	9	q33.3	1	127624409	127640003	ENSG00000136950	-	1940	8	1897	9	26	85.84	0.41	26.851	0	0.324634
Correlated	ARPP19	cAMP-regulated phosphoprotein, 19kDa [Source:HGNC Symbol;Acc:16967]	15	q21.2	-1	52839242	52862080	ENSG00000128989	-	2159	11	2106	19	23	95.53	0.51	23.283	0	0.33459
Correlated	ARPP21	cAMP-regulated phosphoprotein, 21kDa [Source:HGNC Symbol;Acc:16968]	3	p22.3	1	35680437	35835988	ENSG00000172995	-	1919	10	1872	14	23	84.91	0.52	24.23	0	0.345806
Correlated	ARSK	arylsulfatase family, member K [Source:HGNC Symbol;Acc:25239]	5	q15	1	94890778	94940768	ENSG00000164291	+	1053	6	1026	1	20	46.59	0.57	34.714	0	0.438832
Correlated	ARX	aristaless related homeobox [Source:HGNC Symbol;Acc:18060]	X	p21.3	-1	25021811	25034065	ENSG00000004848	-	1048	9	1010	12	17	46.37	0.86	17.275	2.91e-33	0.371193
Correlated	ASB2	ankyrin repeat and SOCS box containing 2 [Source:HGNC Symbol;Acc:16012]	14	q32.12	-1	94400499	94443137	ENSG00000100628	-	1110	10	1065	19	16	49.12	0.9	14.721	4.3e-31	0.348064
Correlated	ASB3	GPR75-ASB3 readthrough///ankyrin repeat and SOCS box containing 3///G protein-coupled receptor 75 [UniGene: Ankyrin repeat and SOCS box containing 3]						unknown	-	1017	5	990	1	21	45	0.49	32.596	2.97e-36	0.394261
Correlated	ASB5	ankyrin repeat and SOCS box containing 5 [Source:HGNC Symbol;Acc:17180]	4	q34.2	-1	177134824	177198722	ENSG00000164122	-	1038	5	1011	1	21	45.93	0.48	33.269	5.45e-37	0.394385
Correlated	ASCL1	achaete-scute complex homolog 1 (Drosophila) [Source:HGNC Symbol;Acc:738]	12	q23.2	1	103351464	103354294	ENSG00000139352	+	2132	13	2072	27	20	94.34	0.61	20.997	0	0.346708
Correlated	ASH1L-AS1	ASH1L antisense RNA 1 [UniGene: Uncharacterized LOC645676]						unknown	+	864	5	838	0	21	38.23	0.58	33.231	3.95e-37	0.433135
Correlated	ASPHD1	aspartate beta-hydroxylase domain containing 1 [Source:HGNC Symbol;Acc:27380]	16	p11.2	1	29911696	29931185	ENSG00000174939	-	2039	12	2000	6	21	90.22	0.59	41.192	0	0.486501
Correlated	ASPHD2	aspartate beta-hydroxylase domain containing 2 [Source:HGNC Symbol;Acc:30437]	22	q12.1	1	26825239	26840981	ENSG00000128203	-	1131	10	1097	8	16	50.04	0.88	24.167	0	0.451916
Correlated	ASXL1	additional sex combs like 1 (Drosophila) [Source:HGNC Symbol;Acc:18318]	20	q11.21	1	30946155	31027122	ENSG00000171456	+	2189	10	2137	18	24	96.86	0.46	22.994	0	0.31446
Correlated	ASXL3	additional sex combs like 3 (Drosophila) [Source:HGNC Symbol;Acc:29357]	18	q12.1	1	31158579	31331156	ENSG00000141431	-	1089	7	1058	5	19	48.19	0.64	24.433	2.55e-37	0.386834
Correlated	ASZ1	ankyrin repeat, SAM and basic leucine zipper domain containing 1 [Source:HGNC Symbol;Acc:1350]	7	q31.2	-1	117003276	117068177	ENSG00000154438	-	933	3	907	0	23	41.28	0.32	35.885	1.23e-24	0.335456
Correlated	ATAD1	ATPase family, AAA domain containing 1 [Source:HGNC Symbol;Acc:25903]	10	q23.31	-1	89511269	89601100	ENSG00000138138	-	1112	6	1083	3	20	49.2	0.54	28.513	1.22e-37	0.384539
Correlated	ATAD2	ATPase family, AAA domain containing 2 [Source:HGNC Symbol;Acc:30123]	8	q24.13	-1	124332090	124428590	ENSG00000156802	+	1896	18	1821	41	16	83.89	0.95	17.013	0	0.387787
Correlated	ATAD3B	ATPase family, AAA domain containing 3B [Source:HGNC Symbol;Acc:24007]	1	p36.33	1	1407143	1433228	ENSG00000160072	+	1107	7	1079	2	19	48.98	0.63	33.115	0	0.450928
Correlated	ATAD5	ATPase family, AAA domain containing 5 [Source:HGNC Symbol;Acc:25752]	17	q11.2	1	29158988	29222887	ENSG00000176208	+	1749	6	1713	3	27	77.39	0.34	35.333	0	0.342421
Correlated	ATE1	arginyltransferase 1 [Source:HGNC Symbol;Acc:782]	10	q26.13	-1	123499939	123688316	ENSG00000107669	-	1128	6	1099	3	20	49.91	0.53	28.923	3.53e-38	0.38465
Correlated	ATF1	activating transcription factor 1 [Source:HGNC Symbol;Acc:783]	12	q13.12	1	51157493	51214905	ENSG00000123268	+	2138	8	2094	10	26	94.6	0.37	27.948	0	0.315651
Correlated	ATF7	activating transcription factor 7 [Source:HGNC Symbol;Acc:792]	12	q13.13	-1	53901640	54020199	ENSG00000170653	+	2244	6	2206	5	27	99.29	0.27	37.091	0	0.309466
Correlated	ATF7IP	activating transcription factor 7 interacting protein [Source:HGNC Symbol;Acc:20092]	12	p13.1	1	14518610	14651697	ENSG00000171681	+	1880	10	1834	12	24	83.19	0.53	25.134	0	0.356398
Correlated	ATF7IP2	activating transcription factor 7 interacting protein 2 [Source:HGNC Symbol;Acc:20397]	16	p13.2	1	10420291	10577495	ENSG00000166669	-	1799	9	1754	11	25	79.6	0.5	23.81	0	0.33568
Correlated	ATG10	autophagy related 10 [Source:HGNC Symbol;Acc:20315]	5	q14.1	1	81267844	81572676	ENSG00000152348	+	1878	5	1844	2	27	83.1	0.27	41.92	0	0.329536
Correlated	ATG16L2	autophagy related 16-like 2 (S. cerevisiae) [Source:HGNC Symbol;Acc:25464]	11	q13.4	1	72525353	72554719	ENSG00000168010	+	1127	6	1093	8	20	49.87	0.53	18.577	2.7e-24	0.302937
Correlated	ATG4B	autophagy related 4B, cysteine peptidase [Source:HGNC Symbol;Acc:20790]	2	q37.3	1	242576628	242613272	ENSG00000168397	+	2091	7	2053	4	27	92.52	0.33	39.136	0	0.356555
Correlated	ATL1	atlastin GTPase 1 [Source:HGNC Symbol;Acc:11231]	14	q22.1	1	50999227	51099786	ENSG00000198513	-	1115	8	1082	7	18	49.34	0.72	22.872	1.18e-39	0.394645
Correlated	ATL2	atlastin GTPase 2 [Source:HGNC Symbol;Acc:24047]	2	p22.1	-1	38522022	38604427	ENSG00000119787	-	1187	6	1157	3	21	52.52	0.51	29.309	1.13e-38	0.377503
Correlated	ATOH7	atonal homolog 7 (Drosophila) [Source:HGNC Symbol;Acc:13907]	10	q21.3	-1	69990386	69991871	ENSG00000179774	-	949	6	923	0	20	41.99	0.63	36.5	0	0.475263
Correlated	ATP11B	ATPase, class VI, type 11B [Source:HGNC Symbol;Acc:13553]	3	q26.33	1	182511288	182639423	ENSG00000058063	+	2192	10	2141	17	24	96.99	0.46	23.878	0	0.320689
Correlated	ATP13A4	ATPase type 13A4 [Source:HGNC Symbol;Acc:25422]	3	q29	-1	193119866	193310900	ENSG00000127249	+	1082	5	1054	2	21	47.88	0.46	29.725	5.48e-33	0.363717
Correlated	ATP1A1OS	ATP1A1 opposite strand [Source:HGNC Symbol;Acc:28262]	1	p13.1	-1	116941622	116961197	ENSG00000203865	+	928	5	899	3	21	41.06	0.54	22.308	8.99e-25	0.337342
Correlated	ATP1A4	ATPase, Na+/K+ transporting, alpha 4 polypeptide [Source:HGNC Symbol;Acc:14073]	1	q23.2	1	160121360	160156767	ENSG00000132681	+	960	4	933	1	22	42.48	0.42	29.538	1.33e-26	0.34453
Correlated	ATP5L	ATP synthase, H+ transporting, mitochondrial Fo complex, subunit G [Source:HGNC Symbol;Acc:14247]	HG122_PATCH	q23.3	1	118271869	118302211	ENSG00000268551	-	2132	11	2085	13	23	94.34	0.52	28.74	0	0.376805
Correlated	ATP6V0C	ATPase, H+ transporting, lysosomal 16kDa, V0 subunit c [Source:HGNC Symbol;Acc:855]	16	p13.3	1	2563871	2570219	ENSG00000185883	-	2119	7	2080	5	27	93.76	0.33	36.355	0	0.340722
Correlated	ATP6V0D2	ATPase, H+ transporting, lysosomal 38kDa, V0 subunit d2 [Source:HGNC Symbol;Acc:18266]	8	q21.3	1	86999552	87166457	ENSG00000147614	+	953	6	922	5	20	42.17	0.63	19.993	2.65e-26	0.343725
Correlated	ATP6V0E1	ATPase, H+ transporting, lysosomal 9kDa, V0 subunit e1 [Source:HGNC Symbol;Acc:863]	5	q35.1	1	172410760	172462448	ENSG00000113732	+	2252	14	2180	38	20	99.65	0.62	17.833	0	0.320405
Correlated	ATP6V1H	ATPase, H+ transporting, lysosomal 50/57kDa, V1 subunit H [Source:HGNC Symbol;Acc:18303]	8	q11.23	-1	54628117	54756118	ENSG00000047249	-	2070	9	2025	11	25	91.59	0.43	27.397	0	0.336933
Correlated	ATP8A2	ATPase, aminophospholipid transporter, class I, type 8A, member 2 [Source:HGNC Symbol;Acc:13533]	13	q12.13	1	25946209	26599989	ENSG00000132932	-	2214	12	2164	16	22	97.96	0.54	27.908	0	0.380312
Correlated	ATPAF1	ATP synthase mitochondrial F1 complex assembly factor 1 [Source:HGNC Symbol;Acc:18803]	1	p33	-1	47098409	47139539	ENSG00000123472	-	1108	8	1074	8	18	49.03	0.72	21.308	7.26e-37	0.38105
Correlated	ATR	ataxia telangiectasia and Rad3 related [Source:HGNC Symbol;Acc:882]	3	q23	-1	142168077	142297668	ENSG00000175054	+	2216	11	2157	25	23	98.05	0.5	19.915	0	0.303419
Correlated	ATRIP	ATR interacting protein [Source:HGNC Symbol;Acc:33499]	3	p21.31	1	48488114	48507115	ENSG00000164053	+	971	4	944	0	23	42.96	0.41	35.963	2.14e-32	0.380295
Correlated	ATRNL1	attractin-like 1 [Source:HGNC Symbol;Acc:29063]	10	q25.3	1	116853124	117708503	ENSG00000107518	-	2029	11	1976	20	22	89.78	0.54	21.817	0	0.333413
[truncated: 3,809 more rows]

## Sheet: KRTAP5-AS1
Target Gene	KRTAP5-AS1
Target Sign	-1
Target Gene LFC >=	1
Gene LFC >=	1
LFC p value <=	0.05
Genes filtered by co-pres >=	10	%
Genes filtered by lift >=	0
[truncated: 3,534 more rows]

## Sheet: OIP5-AS1
Target Gene	OIP5-AS1
[truncated: 4,270 more rows]

[truncated: 6 more sheets: PART1, RFPL1S, RUSC1-AS1, SYN2, UBL7-AS1, UHRF1]
