# Supplementary material for: An Association Rule Mining Approach to Discover lncRNAs Expression Patterns in Cancer Datasets
Source: Biomed Res Int. 2015 Jul 27;2015:146250. doi: 10.1155/2015/146250 (PMC4530207; doi:10.1155/2015/146250)
Supplement: Supplementary file 1 — Supplementary Material The list of comparisons from GEO datasets is provided in Table S1. The list of the 53 lncRNAs contained in at least one of the 102 nonredundant rules identified by the ARM analysis is provided in Table S2. The list of the 102 nonredundant rules identified through the ARM analysis is provided in Table S3. Number of comodulated genes for each of the 10 lncRNAs is provided in Table S4. Results of the CorrelaGenes analyses of the 10 lncRNAs are provided in Table S5. Results of the enrichment analyses of GO terms for the upregulated genes are provided in Table S6. Results of the enrichment analyses of GO terms for the downregulated genes are provided in Table S7. Figure S1. Genomic alignments of RNA-seq reads corresponding to the eight remaining lncRNAs in the three brain tumors types: (A) UHRF1, (B) UBL7-AS1, (C) DLEU2, (D) SYN2, (E) RFPL1S, (F) KRTAP5-AS1, (G) OIP5-AS1 and (H) RUSC1- AS1. In each panel the transcript annotations from both RefSeq and Gencode were displayed. Figure S2. Principal Component Analysis (PCA) performed on the GEO dataset GDS1962 (panels A and B) and ArrayExpress dataset E-GEOD-16011 (panels C and D) considering intensity values of all probes (panels A and C) or only probes corresponding to the 10 lncRNAs (panel B and D). Figure S3. Direct acyclic graph of the brain-specific Gene Ontology terms obtained by the analysis of downregulated genes. [file 146250.f1.zip › 146250.f1/Table_S6_up.xls]

## Sheet: CRNDE
goid	name	refnum	interestnum	pvalue	adjustp	FinalResult
GO:0000278	mitotic cell cycle	856	181	0	0	Final
GO:0022402	cell cycle process	1124	215	0	0	Final
GO:0006259	DNA metabolic process	919	162	6.91e-14	7.27e-10	Final
GO:0051276	chromosome organization	761	140	1.46e-13	1.31e-09	Final
GO:0051726	regulation of cell cycle	747	129	1.27e-10	8.43e-07	Final
GO:0007010	cytoskeleton organization	858	143	1.58e-10	9.99e-07	Final
GO:0051302	regulation of cell division	221	49	4.67e-08	0.000155239	Final
GO:0030326	embryonic limb morphogenesis	122	33	5.47e-08	0.000172929	Final
GO:0048863	stem cell differentiation	296	58	2.8e-07	0.000692953	Final
GO:0044085	cellular component biogenesis	1887	249	4.54e-07	0.00108165	Final
GO:0010628	positive regulation of gene expression	1156	163	1.3e-06	0.00298394	Final
GO:0006357	regulation of transcription from RNA polymerase II promoter	1351	184	2.56e-06	0.00530914	Final
GO:0033036	macromolecule localization	1985	254	4.1e-06	0.00796057	Final
GO:0009792	embryo development ending in birth or egg hatching	581	91	5.9e-06	0.0108088	Final
GO:0048514	blood vessel morphogenesis	355	62	6.32e-06	0.011246	Final
GO:0042127	regulation of cell proliferation	1283	174	6.42e-06	0.0112672	Final
GO:0002009	morphogenesis of an epithelium	389	66	8.66e-06	0.0142076	Final
GO:2000736	regulation of stem cell differentiation	82	22	1.01e-05	0.0164175	Final
GO:2000113	negative regulation of cellular macromolecule biosynthetic process	996	139	1.42e-05	0.0204212	Final
GO:0035239	tube morphogenesis	309	54	2.42e-05	0.0317862	Final
GO:0051297	centrosome organization	69	19	2.7e-05	0.035119	Final
GO:0042476	odontogenesis	114	26	3.85e-05	0.0477199	Final

## Sheet: DLEU2_
goid	name	refnum	interestnum	pvalue	adjustp	FinalResult
GO:0048706	embryonic skeletal system development	120	34	4.18e-10	2.64e-05	Final
GO:0006355	regulation of transcription, DNA-templated	2938	330	1.79e-07	0.00250666	Final
GO:0048598	embryonic morphogenesis	517	77	2.5e-06	0.0162728	Final
GO:0007389	pattern specification process	439	67	4.9e-06	0.0247528	Final

## Sheet: KRTAP5-AS1_
goid	name	refnum	interestnum	pvalue	adjustp	FinalResult
GO:2000026	regulation of multicellular organismal development	1247	182	9.53e-13	1.66e-08	Final
GO:0000278	mitotic cell cycle	856	137	1.18e-12	1.66e-08	Final
GO:0045944	positive regulation of transcription from RNA polymerase II promoter	744	122	4.34e-12	4.57e-08	Final
GO:0048704	embryonic skeletal system morphogenesis	89	31	6.62e-12	6.44e-08	Final
GO:0045935	positive regulation of nucleobase-containing compound metabolic process	1260	180	8.67e-12	7.3e-08	Final
GO:0008284	positive regulation of cell proliferation	727	117	4.23e-11	2.43e-07	Final
GO:0006259	DNA metabolic process	919	139	5.36e-11	2.71e-07	Final
GO:0048646	anatomical structure formation involved in morphogenesis	882	134	9.07e-11	3.95e-07	Final
GO:0001944	vasculature development	551	94	1.7e-10	5.64e-07	Final
GO:0071310	cellular response to organic substance	1616	212	3.17e-10	9.11e-07	Final
GO:0048754	branching morphogenesis of an epithelial tube	167	41	8.26e-10	1.9e-06	Final
GO:0030198	extracellular matrix organization	361	68	9.55e-10	2.08e-06	Final
GO:0000122	negative regulation of transcription from RNA polymerase II promoter	558	92	1.64e-09	3.1e-06	Final
GO:0043009	chordate embryonic development	575	94	1.7e-09	3.16e-06	Final
GO:0051301	cell division	719	109	6.66e-09	1.09e-05	Final
GO:0045596	negative regulation of cell differentiation	498	80	6.28e-08	7.48e-05	Final
GO:0022411	cellular component disassembly	425	71	7.35e-08	8.37e-05	Final
GO:0030155	regulation of cell adhesion	300	55	1e-07	0.000109084	Final
GO:0070848	response to growth factor	642	96	1.08e-07	0.000116115	Final
GO:0048699	generation of neurons	1185	154	2.24e-07	0.000202581	Final
GO:0048468	cell development	1641	201	2.4e-07	0.000210153	Final
GO:0030326	embryonic limb morphogenesis	122	29	5.02e-07	0.000409541	Final
GO:0044770	cell cycle phase transition	447	71	5.42e-07	0.000438991	Final
GO:0060444	branching involved in mammary gland duct morphogenesis	26	12	5.84e-07	0.000469931	Final
GO:0016477	cell migration	952	127	7.18e-07	0.00057411	Final
GO:0007219	Notch signaling pathway	152	33	7.9e-07	0.000623605	Final
GO:0034097	response to cytokine	569	84	1.18e-06	0.00088813	Final
GO:0009954	proximal/distal pattern formation	32	13	1.19e-06	0.00088813	Final
GO:0002682	regulation of immune system process	1098	141	1.51e-06	0.00109338	Final
GO:0045667	regulation of osteoblast differentiation	99	24	3.28e-06	0.00214794	Final
GO:0016337	cell-cell adhesion	444	68	3.5e-06	0.00225401	Final
GO:0007386	compartment pattern specification	5	5	5.11e-06	0.00326208	Final
GO:0051726	regulation of cell cycle	747	99	1.68e-05	0.00903429	Final
GO:0006367	transcription initiation from RNA polymerase II promoter	198	36	1.9e-05	0.0100621	Final
GO:0006516	glycoprotein catabolic process	12	7	2.07e-05	0.0108746	Final
GO:0002483	antigen processing and presentation of endogenous peptide antigen	9	6	2.97e-05	0.014887	Final
GO:0046543	development of secondary female sexual characteristics	9	6	2.97e-05	0.014887	Final
GO:0002460	adaptive immune response based on somatic recombination of immune receptors built from immunoglobulin superfamily domains	210	36	6.93e-05	0.0304903	Final
GO:0002011	morphogenesis of an epithelial sheet	33	11	7.04e-05	0.0307885	Final
GO:0016339	calcium-dependent cell-cell adhesion	28	10	7.72e-05	0.0331971	Final
GO:0031589	cell-substrate adhesion	238	39	9.72e-05	0.0396317	Final
GO:0009057	macromolecule catabolic process	967	118	0.000110076	0.0437346	Final

## Sheet: OIP5-AS1_
goid	name	refnum	interestnum	pvalue	adjustp	FinalResult
GO:2000026	regulation of multicellular organismal development	1247	184	0	0	Final
GO:0071310	cellular response to organic substance	1616	201	1.57e-13	1.04e-09	Final
GO:0045944	positive regulation of transcription from RNA polymerase II promoter	744	112	7.6e-13	4.8e-09	Final
GO:0030198	extracellular matrix organization	361	68	1.41e-12	8.1e-09	Final
GO:0001944	vasculature development	551	90	1.71e-12	9.01e-09	Final
GO:0008284	positive regulation of cell proliferation	727	109	2.06e-12	1.04e-08	Final
GO:0010604	positive regulation of macromolecule metabolic process	2025	231	1.6e-11	6.97e-08	Final
GO:0034097	response to cytokine	569	89	2.58e-11	1.09e-07	Final
GO:0009967	positive regulation of signal transduction	984	132	2.92e-11	1.19e-07	Final
GO:0060284	regulation of cell development	581	89	8.01e-11	2.53e-07	Final
GO:0048699	generation of neurons	1185	150	9.27e-11	2.86e-07	Final
GO:0022603	regulation of anatomical structure morphogenesis	680	99	1.26e-10	3.69e-07	Final
GO:0051093	negative regulation of developmental process	619	92	1.97e-10	5.18e-07	Final
GO:0010941	regulation of cell death	1283	157	4.09e-10	8.34e-07	Final
GO:0048754	branching morphogenesis of an epithelial tube	167	38	5.52e-10	1.03e-06	Final
GO:1902531	regulation of intracellular signal transduction	1283	156	7.5e-10	1.34e-06	Final
GO:0030326	embryonic limb morphogenesis	122	31	1.23e-09	2.02e-06	Final
GO:0070848	response to growth factor	642	91	2.93e-09	4.2e-06	Final
GO:0016477	cell migration	952	120	1.13e-08	1.41e-05	Final
GO:0022617	extracellular matrix disassembly	119	29	1.17e-08	1.44e-05	Final
GO:0030334	regulation of cell migration	466	69	4.62e-08	4.95e-05	Final
GO:0007507	heart development	402	62	5.02e-08	5.33e-05	Final
GO:0048705	skeletal system morphogenesis	196	38	5.86e-08	6.02e-05	Final
GO:0022411	cellular component disassembly	425	64	7.6e-08	7.62e-05	Final
GO:0048706	embryonic skeletal system development	120	27	2.18e-07	0.000195493	Final
GO:0030155	regulation of cell adhesion	300	49	2.23e-07	0.000198079	Final
GO:0002011	morphogenesis of an epithelial sheet	33	13	3.37e-07	0.000285725	Final
GO:0030856	regulation of epithelial cell differentiation	96	23	5.23e-07	0.000420668	Final
GO:0048708	astrocyte differentiation	46	15	7.51e-07	0.000585668	Final
GO:0006955	immune response	1307	145	1.01e-06	0.000767533	Final
GO:0060740	prostate gland epithelium morphogenesis	31	12	1.2e-06	0.000897217	Final
GO:0030099	myeloid cell differentiation	284	45	1.63e-06	0.00119016	Final
GO:0007249	I-kappaB kinase/NF-kappaB signaling	233	39	2.04e-06	0.00148123	Final
GO:0044093	positive regulation of molecular function	1192	131	5.83e-06	0.00377932	Final
GO:0001816	cytokine production	513	67	6.95e-06	0.0044099	Final
GO:0015031	protein transport	1339	143	9.74e-06	0.00583338	Final
GO:0006468	protein phosphorylation	1196	130	1.1e-05	0.00637607	Final
GO:0002480	antigen processing and presentation of exogenous peptide antigen via MHC class I, TAP-independent	9	6	1.27e-05	0.00713136	Final
GO:0002483	antigen processing and presentation of endogenous peptide antigen	9	6	1.27e-05	0.00713136	Final
GO:0043010	camera-type eye development	251	39	1.27e-05	0.00713136	Final
GO:0021794	thalamus development	13	7	1.58e-05	0.00858683	Final
GO:0048146	positive regulation of fibroblast proliferation	45	13	1.82e-05	0.00976911	Final
GO:0060411	cardiac septum morphogenesis	46	13	2.37e-05	0.0120224	Final
GO:0016337	cell-cell adhesion	444	58	2.84e-05	0.01397	Final
GO:0048593	camera-type eye morphogenesis	97	19	0.000101586	0.0427835	Final
GO:2000736	regulation of stem cell differentiation	82	17	0.000111961	0.0461727	Final
GO:0010715	regulation of extracellular matrix disassembly	8	5	0.000112923	0.0461727	Final
GO:0016197	endosomal transport	157	26	0.000118977	0.0479716	Final

## Sheet: PART1
goid	name	refnum	interestnum	pvalue	adjustp	FinalResult
NO SIGNIFICANT RESULTS

## Sheet: RFPL1S
goid	name	refnum	interestnum	pvalue	adjustp	FinalResult
GO:0016071	mRNA metabolic process	627	117	9.62e-11	8.11e-07	Final
GO:0008380	RNA splicing	338	73	5.95e-10	4.7e-06	Final
GO:0006259	DNA metabolic process	919	152	1.49e-09	1.11e-05	Final
GO:0006260	DNA replication	290	62	1.77e-08	0.000117461	Final
GO:2000112	regulation of cellular macromolecule biosynthetic process	3217	417	3.41e-08	0.000205089	Final
GO:0071826	ribonucleoprotein complex subunit organization	137	33	2.58e-06	0.00815552	Final
GO:2001141	regulation of RNA biosynthetic process	2975	376	3.25e-06	0.00977935	Final
GO:0006412	translation	490	83	3.54e-06	0.0103918	Final
GO:0000278	mitotic cell cycle	856	129	5.15e-06	0.0133309	Final
GO:0034470	ncRNA processing	215	43	1.57e-05	0.0347024	Final

## Sheet: RUSC1-AS1
goid	name	refnum	interestnum	pvalue	adjustp	FinalResult
GO:0000278	mitotic cell cycle	856	186	0	0	Final
GO:0022402	cell cycle process	1124	208	0	0	Final
GO:0051276	chromosome organization	761	127	1.97e-14	1.91e-10	Final
GO:0006260	DNA replication	290	66	3.86e-14	3.49e-10	Final
GO:0007051	spindle organization	89	32	3.61e-13	2.68e-09	Final
GO:0006281	DNA repair	416	81	4.43e-13	3.11e-09	Final
GO:0071103	DNA conformation change	206	44	5.82e-09	2.1e-05	Final
GO:0006357	regulation of transcription from RNA polymerase II promoter	1351	171	1.48e-08	5.18e-05	Final
GO:0051302	regulation of cell division	221	45	1.85e-08	6.27e-05	Final
GO:0000075	cell cycle checkpoint	229	46	1.99e-08	6.32e-05	Final
GO:0051254	positive regulation of RNA metabolic process	1120	142	2.63e-07	0.000678243	Final
GO:0010628	positive regulation of gene expression	1156	145	3.7e-07	0.000898091	Final
GO:0021915	neural tube development	137	29	2.71e-06	0.00511144	Final
GO:0048704	embryonic skeletal system morphogenesis	89	22	3.02e-06	0.0054429	Final
GO:0000398	mRNA splicing, via spliceosome	218	39	4.86e-06	0.00819031	Final
GO:0034622	cellular macromolecular complex assembly	602	82	7.54e-06	0.0114937	Final
GO:0022411	cellular component disassembly	425	62	1.21e-05	0.0163019	Final
GO:0022403	cell cycle phase	41	13	1.84e-05	0.0232354	Final
GO:0006312	mitotic recombination	36	12	2.18e-05	0.0268823	Final
GO:0001838	embryonic epithelial tube formation	107	23	2.19e-05	0.0268823	Final
GO:0051653	spindle localization	26	10	2.56e-05	0.0300271	Final
GO:0090103	cochlea morphogenesis	22	9	3.67e-05	0.0390112	Final

## Sheet: SYN2
goid	name	refnum	interestnum	pvalue	adjustp	FinalResult
GO:0090304	nucleic acid metabolic process	4535	443	2.08e-14	2.62e-09	Final
GO:0010467	gene expression	5248	482	3.73e-11	1.3e-06	Final
GO:0007049	cell cycle	1499	163	5.37e-08	0.000521463	Final
GO:0034645	cellular macromolecule biosynthetic process	4263	385	1.59e-07	0.00118538	Final
GO:0022618	ribonucleoprotein complex assembly	130	25	6.21e-06	0.0280038	Final

## Sheet: UBL7-AS1_
goid	name	refnum	interestnum	pvalue	adjustp	FinalResult
GO:0000122	negative regulation of transcription from RNA polymerase II promoter	558	109	7.67396e-06	0.00914692	Final
GO:0000278	mitotic cell cycle	856	210	0	0	Final
GO:0006260	DNA replication	290	79	6.46041e-11	5.44164e-07	Final
GO:0006281	DNA repair	416	93	8.592e-08	0.000293396	Final
GO:0007051	spindle organization	89	33	8.20068e-09	3.81487e-05	Final
GO:0007219	Notch signaling pathway	152	39	1.99253e-05	0.01998	Final
GO:0008380	RNA splicing	338	74	3.99437e-06	0.00567048	Final
GO:0009314	response to radiation	411	82	4.729e-05	0.040924	Final
GO:0009887	organ morphogenesis	808	156	1.75668e-07	0.000493219	Final
GO:0010628	positive regulation of gene expression	1156	205	1.43918e-06	0.00263529	Final
GO:0031503	protein complex localization	39	16	1.30505e-05	0.014093	Final
GO:0042127	regulation of cell proliferation	1283	232	5.27242e-08	0.000190328	Final
GO:0043392	negative regulation of DNA binding	38	15	4.18289e-05	0.0364476	Final
GO:0043488	regulation of mRNA stability	41	16	2.75869e-05	0.0262067	Final
GO:0044770	cell cycle phase transition	447	105	7.17036e-10	4.52973e-06	Final
GO:0045787	positive regulation of cell cycle	116	31	5.97255e-05	0.0474595	Final
GO:0048514	blood vessel morphogenesis	355	75	1.3203e-05	0.0141368	Final
GO:0048704	embryonic skeletal system morphogenesis	89	32	3.24909e-08	0.000128284	Final
GO:0048754	branching morphogenesis of an epithelial tube	167	46	4.36877e-07	0.00104146	Final
GO:0051254	positive regulation of RNA metabolic process	1120	200	1.20135e-06	0.00229978	Final
GO:0051726	regulation of cell cycle	747	145	3.50904e-07	0.000852602	Final
GO:0090103	cochlea morphogenesis	22	11	3.23906e-05	0.0298717	Final
GO:2000112	regulation of cellular macromolecule biosynthetic process	3217	502	1.15359e-06	0.00227736	Final

## Sheet: UHRF1
goid	name	refnum	interestnum	pvalue	adjustp	FinalResult
GO:0000278	mitotic cell cycle	856	207	0	0	Final
GO:0006259	DNA metabolic process	919	178	0	0	Final
GO:0007051	spindle organization	89	37	0	0	Final
GO:0007059	chromosome segregation	157	58	0	0	Final
GO:0022402	cell cycle process	1124	221	0	0	Final
GO:0051276	chromosome organization	761	125	0	0	Final
GO:0000075	cell cycle checkpoint	229	48	2.22e-16	7.79e-13	Final
GO:0034728	nucleosome organization	130	31	1.51e-12	4.15e-09	Final
GO:0034508	centromere complex assembly	33	16	2.26e-12	5.96e-09	Final
GO:0044786	cell cycle DNA replication	39	17	4.06e-12	1.01e-08	Final
GO:0043044	ATP-dependent chromatin remodeling	36	16	1.22e-11	2.48e-08	Final
GO:1901988	negative regulation of cell cycle phase transition	184	33	9.79e-10	1.55e-06	Final
GO:0051321	meiotic cell cycle	175	31	4.3e-09	6.17e-06	Final
GO:0031503	protein complex localization	39	14	6.95e-09	9.65e-06	Final
GO:0000085	mitotic G2 phase	9	7	4.31e-08	5.04e-05	Final
GO:0090068	positive regulation of cell cycle process	207	32	7.15e-08	8.14e-05	Final
GO:0051329	mitotic interphase	22	10	7.22e-08	8.14e-05	Final
GO:0000279	M phase	20	8	4.97e-06	0.00436023	Final
GO:0048562	embryonic organ morphogenesis	266	33	7.2e-06	0.00618538	Final
GO:0045787	positive regulation of cell cycle	116	19	1.38e-05	0.0115541	Final
GO:0046653	tetrahydrofolate metabolic process	17	7	1.59e-05	0.0131152	Final
GO:0009790	embryo development	967	82	2.82e-05	0.0217499	Final
GO:0051383	kinetochore organization	13	6	3.03e-05	0.023085	Final
GO:0070828	heterochromatin organization	9	5	4.79e-05	0.0354186	Final

[truncated: 1 more sheets: COMMON_GENES]
