# Supplementary material for: An Association Rule Mining Approach to Discover lncRNAs Expression Patterns in Cancer Datasets
Source: Biomed Res Int. 2015 Jul 27;2015:146250. doi: 10.1155/2015/146250 (PMC4530207; doi:10.1155/2015/146250)
Supplement: Supplementary file 1 — Supplementary Material The list of comparisons from GEO datasets is provided in Table S1. The list of the 53 lncRNAs contained in at least one of the 102 nonredundant rules identified by the ARM analysis is provided in Table S2. The list of the 102 nonredundant rules identified through the ARM analysis is provided in Table S3. Number of comodulated genes for each of the 10 lncRNAs is provided in Table S4. Results of the CorrelaGenes analyses of the 10 lncRNAs are provided in Table S5. Results of the enrichment analyses of GO terms for the upregulated genes are provided in Table S6. Results of the enrichment analyses of GO terms for the downregulated genes are provided in Table S7. Figure S1. Genomic alignments of RNA-seq reads corresponding to the eight remaining lncRNAs in the three brain tumors types: (A) UHRF1, (B) UBL7-AS1, (C) DLEU2, (D) SYN2, (E) RFPL1S, (F) KRTAP5-AS1, (G) OIP5-AS1 and (H) RUSC1- AS1. In each panel the transcript annotations from both RefSeq and Gencode were displayed. Figure S2. Principal Component Analysis (PCA) performed on the GEO dataset GDS1962 (panels A and B) and ArrayExpress dataset E-GEOD-16011 (panels C and D) considering intensity values of all probes (panels A and C) or only probes corresponding to the 10 lncRNAs (panel B and D). Figure S3. Direct acyclic graph of the brain-specific Gene Ontology terms obtained by the analysis of downregulated genes. [file 146250.f1.zip › 146250.f1/Table_S7_down.xls]

## Sheet: CRNDE
goid	name	refnum	interestnum	pvalue	adjustp	FinalResult
GO:0007268	synaptic transmission	689	241	0	0	Final
GO:0007399	nervous system development	1867	392	0	0	Final
GO:0043269	regulation of ion transport	333	96	2.84e-14	9.21e-11	Final
GO:0006887	exocytosis	302	86	1.34e-12	3.33e-09	Final
GO:0006836	neurotransmitter transport	138	51	1.42e-12	3.45e-09	Final
GO:0034220	ion transmembrane transport	541	129	6.18e-12	1.35e-08	Final
GO:0051050	positive regulation of transport	564	133	6.65e-12	1.42e-08	Final
GO:0032409	regulation of transporter activity	122	46	7.83e-12	1.65e-08	Final
GO:0009611	response to wounding	1157	229	4.98e-11	1.02e-07	Final
GO:0017157	regulation of exocytosis	87	36	6.62e-11	1.23e-07	Final
GO:0070838	divalent metal ion transport	285	78	1.25e-10	2.22e-07	Final
GO:0051899	membrane depolarization	94	37	2.04e-10	3.39e-07	Final
GO:0022610	biological adhesion	1006	200	6.56e-10	1.04e-06	Final
GO:0019932	second-messenger-mediated signaling	175	54	8.68e-10	1.34e-06	Final
GO:0060627	regulation of vesicle-mediated transport	246	68	1.22e-09	1.85e-06	Final
GO:0050817	coagulation	510	116	1.56e-09	2.29e-06	Final
GO:0030534	adult behavior	135	44	4.83e-09	6.41e-06	Final
GO:0007186	G-protein coupled receptor signaling pathway	649	138	4.87e-09	6.41e-06	Final
GO:0051056	regulation of small GTPase mediated signal transduction	392	93	7.68e-09	9.8e-06	Final
GO:0001775	cell activation	826	165	1.65e-08	2.01e-05	Final
GO:0007626	locomotory behavior	172	50	3.22e-08	3.88e-05	Final
GO:1901700	response to oxygen-containing compound	1129	211	4.53e-08	5.4e-05	Final
GO:0006897	endocytosis	458	102	4.81e-08	5.68e-05	Final
GO:0002376	immune system process	2108	357	8.19e-08	9.16e-05	Final
GO:0006928	cellular component movement	1512	268	9.29e-08	0.000103005	Final
GO:0051239	regulation of multicellular organismal process	1966	334	1.74e-07	0.000186216	Final
GO:2000021	regulation of ion homeostasis	145	42	4.42e-07	0.000423471	Final
GO:0032970	regulation of actin filament-based process	257	63	5.99e-07	0.000556641	Final
GO:0032844	regulation of homeostatic process	292	69	7.65e-07	0.000695073	Final
GO:0017156	calcium ion-dependent exocytosis	56	22	9.81e-07	0.000866606	Final
GO:0007015	actin filament organization	250	61	1.06e-06	0.000920621	Final
GO:0070887	cellular response to chemical stimulus	2040	339	1.28e-06	0.0010796	Final
GO:0006874	cellular calcium ion homeostasis	291	68	1.41e-06	0.00117566	Final
GO:0015844	monoamine transport	62	23	1.83e-06	0.00147835	Final
GO:0051017	actin filament bundle assembly	90	29	2.55e-06	0.00196093	Final
GO:0071417	cellular response to organonitrogen compound	420	89	3.17e-06	0.00233392	Final
GO:0051174	regulation of phosphorus metabolic process	1555	264	4.58e-06	0.00330666	Final
GO:0001508	action potential	132	37	4.92e-06	0.00351544	Final
GO:0006865	amino acid transport	128	36	6.05e-06	0.0042704	Final
GO:0007169	transmembrane receptor protein tyrosine kinase signaling pathway	669	128	7.16e-06	0.00489281	Final
GO:0060359	response to ammonium ion	58	21	7.94e-06	0.00523859	Final
GO:0051047	positive regulation of secretion	248	58	7.96e-06	0.00523859	Final
GO:0050808	synapse organization	157	41	1.06e-05	0.00675385	Final
GO:0050796	regulation of insulin secretion	158	41	1.26e-05	0.00766479	Final
GO:0002686	negative regulation of leukocyte migration	18	10	2.55e-05	0.0139432	Final
GO:0050778	positive regulation of immune response	486	96	2.8e-05	0.0150392	Final
GO:0002460	adaptive immune response based on somatic recombination of immune receptors built from immunoglobulin superfamily domains	210	49	4.16e-05	0.0210219	Final
GO:0002819	regulation of adaptive immune response	109	30	5.47e-05	0.0263692	Final
GO:0002683	negative regulation of immune system process	207	48	5.86e-05	0.0280247	Final
GO:0035587	purinergic receptor signaling pathway	13	8	6.41e-05	0.0300751	Final
GO:0003013	circulatory system process	375	76	7.89e-05	0.03528	Final
GO:0019233	sensory perception of pain	77	23	0.000102193	0.0445228	Final
GO:0035637	multicellular organismal signaling	82	24	0.000104034	0.0451335	Final
GO:0050851	antigen receptor-mediated signaling pathway	134	34	0.000108359	0.0464139	Final
GO:0001975	response to amphetamine	28	12	0.00010837	0.0464139	Final

## Sheet: DLEU2
goid	name	refnum	interestnum	pvalue	adjustp	FinalResult
GO:0007268	synaptic transmission	689	120	7.77e-16	9.82e-11	Final
GO:0007269	neurotransmitter secretion	104	27	4.78e-08	0.00151017	Final
GO:0031175	neuron projection development	766	100	1.72e-06	0.0362282	Final

## Sheet: KRTAP5-AS1
goid	name	refnum	interestnum	pvalue	adjustp	FinalResult
GO:0006836	neurotransmitter transport	138	58	0	0	Final
GO:0007268	synaptic transmission	689	250	0	0	Final
GO:0007399	nervous system development	1867	334	0	0	Final
GO:0007626	locomotory behavior	172	57	0	0	Final
GO:0030001	metal ion transport	607	127	0	0	Final
GO:0034220	ion transmembrane transport	541	116	0	0	Final
GO:0042391	regulation of membrane potential	297	77	0	0	Final
GO:0050890	cognition	192	63	0	0	Final
GO:0030534	adult behavior	135	47	2.22e-16	6.84e-13	Final
GO:0007186	G-protein coupled receptor signaling pathway	649	125	8.88e-16	2.61e-12	Final
GO:0050808	synapse organization	157	47	1.59e-13	3.58e-10	Final
GO:0017157	regulation of exocytosis	87	33	4.26e-13	9.13e-10	Final
GO:0002791	regulation of peptide secretion	176	47	1.48e-11	2.64e-08	Final
GO:0017156	calcium ion-dependent exocytosis	56	24	3.18e-11	5.21e-08	Final
GO:0030073	insulin secretion	183	47	6.47e-11	1.01e-07	Final
GO:0046883	regulation of hormone secretion	209	51	7.61e-11	1.17e-07	Final
GO:0010959	regulation of metal ion transport	216	49	2.57e-09	3.38e-06	Final
GO:0019932	second-messenger-mediated signaling	175	42	6.06e-09	7.5e-06	Final
GO:0007215	glutamate receptor signaling pathway	57	21	1.44e-08	1.71e-05	Final
GO:0060359	response to ammonium ion	58	21	2.06e-08	2.38e-05	Final
GO:1901069	guanosine-containing compound catabolic process	458	79	3.88e-08	4.05e-05	Final
GO:0007214	gamma-aminobutyric acid signaling pathway	21	12	5.13e-08	5.27e-05	Final
GO:0051480	cytosolic calcium ion homeostasis	214	45	1.26e-07	0.000120532	Final
GO:0052652	cyclic purine nucleotide metabolic process	124	31	2.18e-07	0.000194383	Final
GO:1900371	regulation of purine nucleotide biosynthetic process	116	29	5.33e-07	0.000437373	Final
GO:0050905	neuromuscular process	98	26	5.95e-07	0.000482052	Final
GO:0051056	regulation of small GTPase mediated signal transduction	392	66	1.24e-06	0.000935811	Final
GO:0007188	adenylate cyclase-modulating G-protein coupled receptor signaling pathway	116	28	1.78e-06	0.00127466	Final
GO:0007631	feeding behavior	93	24	2.73e-06	0.00190581	Final
GO:0010970	microtubule-based transport	77	21	4.4e-06	0.00297149	Final
GO:0016311	dephosphorylation	313	53	1.16e-05	0.00697104	Final
GO:0007202	activation of phospholipase C activity	58	17	1.25e-05	0.00737235	Final
GO:0001975	response to amphetamine	28	11	2.04e-05	0.0112304	Final
GO:0035418	protein localization to synapse	12	7	3.03e-05	0.0159465	Final
GO:0032411	positive regulation of transporter activity	40	13	3.92e-05	0.0193998	Final
GO:0007218	neuropeptide signaling pathway	100	22	0.000100007	0.0438734	Final
GO:0050432	catecholamine secretion	38	12	0.000106162	0.0456229	Final

## Sheet: OIP5-AS1
goid	name	refnum	interestnum	pvalue	adjustp	FinalResult
GO:0007268	synaptic transmission	689	215	0	0	Final
GO:0006396	RNA processing	675	160	8.62e-11	3.63e-06	Final
GO:0034660	ncRNA metabolic process	303	83	3.88e-09	0.00010117	Final
GO:0007399	nervous system development	1867	345	4.25e-07	0.00358009	Final
GO:0006996	organelle organization	2532	448	1.11e-06	0.00787925	Final
GO:0017157	regulation of exocytosis	87	29	8.48e-06	0.0357202	Final
GO:0042254	ribosome biogenesis	159	44	1.29e-05	0.0492821	Final

## Sheet: PART1
goid	name	refnum	interestnum	pvalue	adjustp	FinalResult
GO:0006812	cation transport	763	100	0	0	Final
GO:0007268	synaptic transmission	689	146	0	0	Final
GO:0034220	ion transmembrane transport	541	89	0	0	Final
GO:0007399	nervous system development	1867	179	1.11e-16	1.75e-12	Final
GO:0043269	regulation of ion transport	333	55	2.66e-14	3.74e-10	Final
GO:0007626	locomotory behavior	172	36	6.98e-13	5.23e-09	Final
GO:0006836	neurotransmitter transport	138	32	7.08e-13	5.23e-09	Final
GO:0007186	G-protein coupled receptor signaling pathway	649	75	8.1e-11	3.53e-07	Final
GO:0007611	learning or memory	177	33	1.68e-10	7.07e-07	Final
GO:0007215	glutamate receptor signaling pathway	57	18	3.49e-10	1.26e-06	Final
GO:0030534	adult behavior	135	26	7.2e-09	1.89e-05	Final
GO:0017156	calcium ion-dependent exocytosis	56	16	1.69e-08	4.11e-05	Final
GO:0007214	gamma-aminobutyric acid signaling pathway	21	10	3.18e-08	7.17e-05	Final
GO:0030073	insulin secretion	183	29	9.43e-08	0.000199843	Final
GO:0017157	regulation of exocytosis	87	19	9.49e-08	0.000199843	Final
GO:0009187	cyclic nucleotide metabolic process	163	27	1.03e-07	0.000212813	Final
GO:0002791	regulation of peptide secretion	176	28	1.44e-07	0.000284364	Final
GO:0051952	regulation of amine transport	56	14	8.13e-07	0.00144618	Final
GO:0014047	glutamate secretion	31	10	2.47e-06	0.00371602	Final
GO:0007600	sensory perception	517	52	5.18e-06	0.00711532	Final

## Sheet: RFPL1S
goid	name	refnum	interestnum	pvalue	adjustp	FinalResult
GO:0006836	neurotransmitter transport	138	73	0	0	Final
GO:0007268	synaptic transmission	689	316	0	0	Final
GO:0007399	nervous system development	1867	524	0	0	Final
GO:0034220	ion transmembrane transport	541	195	0	0	Final
GO:0044708	single-organism behavior	343	143	0	0	Final
GO:0006812	cation transport	763	245	4.88e-15	4.41e-11	Final
GO:0006813	potassium ion transport	140	70	5.33e-15	4.49e-11	Final
GO:0043269	regulation of ion transport	333	127	4.66e-14	3.1e-10	Final
GO:0030030	cell projection organization	1049	311	1.27e-13	6.76e-10	Final
GO:0007626	locomotory behavior	172	74	1.31e-11	4.72e-08	Final
GO:0048812	neuron projection morphogenesis	600	191	1.39e-11	4.87e-08	Final
GO:0007215	glutamate receptor signaling pathway	57	33	6.07e-10	1.4e-06	Final
GO:0007186	G-protein coupled receptor signaling pathway	649	195	1.96e-09	4.06e-06	Final
GO:0002791	regulation of peptide secretion	176	69	7.66e-09	1.4e-05	Final
GO:0046883	regulation of hormone secretion	209	78	1.12e-08	2e-05	Final
GO:0014047	glutamate secretion	31	21	1.61e-08	2.79e-05	Final
GO:0030073	insulin secretion	183	70	1.97e-08	3.28e-05	Final
GO:0019226	transmission of nerve impulse	50	27	1.61e-07	0.000231795	Final
GO:0017156	calcium ion-dependent exocytosis	56	29	1.88e-07	0.000267434	Final
GO:0050808	synapse organization	157	60	2.06e-07	0.000289054	Final
GO:0007214	gamma-aminobutyric acid signaling pathway	21	15	6.74e-07	0.000896693	Final
GO:0016358	dendrite development	141	54	7.59e-07	0.000981502	Final
GO:0017157	regulation of exocytosis	87	38	7.61e-07	0.000981502	Final
GO:0007631	feeding behavior	93	39	1.91e-06	0.00233956	Final
GO:0042596	fear response	30	18	2.49e-06	0.00299762	Final
GO:0005513	detection of calcium ion	12	10	5.51e-06	0.00644474	Final
GO:0007600	sensory perception	517	145	1.6e-05	0.0161401	Final
GO:0051339	regulation of lyase activity	70	30	1.71e-05	0.0171268	Final
GO:0048265	response to pain	31	17	2.48e-05	0.0241422	Final
GO:0051705	multi-organism behavior	72	30	3.29e-05	0.0307578	Final
GO:0007187	G-protein coupled receptor signaling pathway, coupled to cyclic nucleotide second messenger	148	51	4.67e-05	0.0408664	Final
GO:0006820	anion transport	402	115	4.74e-05	0.0410248	Final
GO:0019932	second-messenger-mediated signaling	175	58	5.28e-05	0.0454222	Final

## Sheet: RUSC1-AS1
goid	name	refnum	interestnum	pvalue	adjustp	FinalResult
GO:0006811	ion transport	1182	251	0	0	Final
GO:0007268	synaptic transmission	689	238	0	0	Final
GO:0007399	nervous system development	1867	385	0	0	Final
GO:0050890	cognition	192	70	0	0	Final
GO:0007186	G-protein coupled receptor signaling pathway	649	138	2.89e-15	7.6e-12	Final
GO:0034220	ion transmembrane transport	541	121	3.55e-15	8.8e-12	Final
GO:0007626	locomotory behavior	172	56	1.29e-14	3.13e-11	Final
GO:0006836	neurotransmitter transport	138	48	6.01e-14	1.38e-10	Final
GO:0030534	adult behavior	135	46	4.71e-13	9.75e-10	Final
GO:0050808	synapse organization	157	50	8.77e-13	1.73e-09	Final
GO:0006816	calcium ion transport	275	70	5.55e-12	9.74e-09	Final
GO:0030072	peptide hormone secretion	206	57	1.5e-11	2.46e-08	Final
GO:0032412	regulation of ion transmembrane transporter activity	107	37	5.5e-11	8.48e-08	Final
GO:0002791	regulation of peptide secretion	176	49	3.18e-10	4.14e-07	Final
GO:0046883	regulation of hormone secretion	209	54	8.27e-10	1e-06	Final
GO:0017157	regulation of exocytosis	87	31	8.46e-10	1.01e-06	Final
GO:0010959	regulation of metal ion transport	216	55	1.03e-09	1.21e-06	Final
GO:0007155	cell adhesion	1002	170	1.15e-09	1.32e-06	Final
GO:0046058	cAMP metabolic process	129	37	1.94e-08	1.95e-05	Final
GO:0006112	energy reserve metabolic process	169	44	2.34e-08	2.31e-05	Final
GO:0017156	calcium ion-dependent exocytosis	56	22	3.06e-08	2.93e-05	Final
GO:0044057	regulation of system process	351	73	3.16e-08	3e-05	Final
GO:0019932	second-messenger-mediated signaling	175	44	7.11e-08	6.56e-05	Final
GO:0007631	feeding behavior	93	29	8.94e-08	8.07e-05	Final
GO:0042596	fear response	30	15	1.05e-07	9.25e-05	Final
GO:1900542	regulation of purine nucleotide metabolic process	493	91	2.5e-07	0.000207802	Final
GO:0010243	response to organonitrogen compound	682	116	5.2e-07	0.000390868	Final
GO:0052652	cyclic purine nucleotide metabolic process	124	33	7.55e-07	0.000548408	Final
GO:2000021	regulation of ion homeostasis	145	36	1.48e-06	0.000996497	Final
GO:0031346	positive regulation of cell projection organization	177	41	1.99e-06	0.00128909	Final
GO:0050905	neuromuscular process	98	26	1.16e-05	0.00635833	Final
GO:0001975	response to amphetamine	28	12	1.52e-05	0.00808728	Final
GO:1900373	positive regulation of purine nucleotide biosynthetic process	73	21	2.11e-05	0.0107257	Final
GO:0007214	gamma-aminobutyric acid signaling pathway	21	10	2.58e-05	0.0127207	Final
GO:0007202	activation of phospholipase C activity	58	18	2.62e-05	0.012781	Final
GO:0048638	regulation of developmental growth	127	30	3.05e-05	0.0147459	Final
GO:0043279	response to alkaloid	110	27	3.65e-05	0.0171883	Final
GO:0031345	negative regulation of cell projection organization	99	25	4.22e-05	0.0192975	Final
GO:0007218	neuropeptide signaling pathway	100	25	5.05e-05	0.0225363	Final

## Sheet: SYN2
goid	name	refnum	interestnum	pvalue	adjustp	FinalResult
GO:0006836	neurotransmitter transport	138	62	0	0	Final
GO:0007268	synaptic transmission	689	268	0	0	Final
GO:0007399	nervous system development	1867	422	0	0	Final
GO:0034220	ion transmembrane transport	541	163	0	0	Final
GO:0006813	potassium ion transport	140	60	3.11e-15	2.45e-11	Final
GO:0007600	sensory perception	517	147	4e-15	2.81e-11	Final
GO:0043269	regulation of ion transport	333	106	1.1e-14	6.94e-11	Final
GO:0042391	regulation of membrane potential	297	97	2.54e-14	1.46e-10	Final
GO:0044708	single-organism behavior	343	106	9.68e-14	5.1e-10	Final
GO:0007186	G-protein coupled receptor signaling pathway	649	167	8.23e-13	4e-09	Final
GO:0007215	glutamate receptor signaling pathway	57	29	3.07e-10	9.24e-07	Final
GO:0007626	locomotory behavior	172	58	1.04e-09	2.92e-06	Final
GO:0050808	synapse organization	157	53	5.17e-09	1.21e-05	Final
GO:0046883	regulation of hormone secretion	209	62	7.16e-08	0.000137127	Final
GO:0035725	sodium ion transmembrane transport	86	31	1.56e-06	0.00216476	Final
GO:0007188	adenylate cyclase-modulating G-protein coupled receptor signaling pathway	116	38	1.71e-06	0.00230163	Final
GO:0034587	piRNA metabolic process	11	9	1.77e-06	0.00232465	Final
GO:0017157	regulation of exocytosis	87	31	2.07e-06	0.00269958	Final
GO:0002791	regulation of peptide secretion	176	51	2.17e-06	0.00274438	Final
GO:0014047	glutamate secretion	31	16	2.39e-06	0.00292757	Final
GO:0022610	biological adhesion	1006	205	3.19e-06	0.00373168	Final
GO:0030073	insulin secretion	183	52	3.28e-06	0.00380337	Final
GO:0019226	transmission of nerve impulse	50	21	4.69e-06	0.00529512	Final
GO:1900371	regulation of purine nucleotide biosynthetic process	116	37	4.74e-06	0.00529512	Final
GO:0007631	feeding behavior	93	31	1.01e-05	0.0100249	Final
GO:0052652	cyclic purine nucleotide metabolic process	124	38	1.02e-05	0.0100249	Final
GO:0006820	anion transport	402	93	1.45e-05	0.0135842	Final
GO:0042074	cell migration involved in gastrulation	13	9	1.71e-05	0.0159273	Final

## Sheet: UBL7-AS1
goid	name	refnum	interestnum	pvalue	adjustp	FinalResult
GO:0006836	neurotransmitter transport	138	55	0	0	Final
GO:0007268	synaptic transmission	689	261	0	0	Final
GO:0007399	nervous system development	1867	392	0	0	Final
GO:0050877	neurological system process	780	179	0	0	Final
GO:0006812	cation transport	763	165	1.11e-16	3.34e-13	Final
GO:0034220	ion transmembrane transport	541	129	1.11e-16	3.34e-13	Final
GO:0030534	adult behavior	135	50	7.33e-15	1.78e-11	Final
GO:0007186	G-protein coupled receptor signaling pathway	649	141	1.35e-14	3.23e-11	Final
GO:0050808	synapse organization	157	53	9.57e-14	2.12e-10	Final
GO:0007626	locomotory behavior	172	56	1.09e-13	2.34e-10	Final
GO:0032412	regulation of ion transmembrane transporter activity	107	40	2.56e-12	4.98e-09	Final
GO:0006887	exocytosis	302	75	4.1e-11	7.09e-08	Final
GO:0017157	regulation of exocytosis	87	33	1.33e-10	2.15e-07	Final
GO:0002791	regulation of peptide secretion	176	49	1.76e-09	2.47e-06	Final
GO:0035418	protein localization to synapse	12	10	1.99e-08	2.22e-05	Final
GO:0019932	second-messenger-mediated signaling	175	46	3.84e-08	4.04e-05	Final
GO:0007155	cell adhesion	1002	168	1.22e-07	0.000120376	Final
GO:1901069	guanosine-containing compound catabolic process	458	89	2.95e-07	0.00027652	Final
GO:0044057	regulation of system process	351	72	4.98e-07	0.0004432	Final
GO:0007214	gamma-aminobutyric acid signaling pathway	21	12	5.28e-07	0.000462846	Final
GO:0031345	negative regulation of cell projection organization	99	29	1.13e-06	0.000894483	Final
GO:0007188	adenylate cyclase-modulating G-protein coupled receptor signaling pathway	116	31	4.22e-06	0.0028671	Final
GO:0007264	small GTPase mediated signal transduction	512	91	1.09e-05	0.00676058	Final
GO:0006112	energy reserve metabolic process	169	39	1.27e-05	0.00774673	Final
GO:0001975	response to amphetamine	28	12	2.53e-05	0.0148679	Final
GO:0007218	neuropeptide signaling pathway	100	26	4.11e-05	0.0230642	Final
GO:0050433	regulation of catecholamine secretion	34	13	5e-05	0.0271832	Final
GO:0032410	negative regulation of transporter activity	31	12	8.45e-05	0.0413918	Final

## Sheet: UHRF1
goid	name	refnum	interestnum	pvalue	adjustp	FinalResult
GO:0007268	synaptic transmission	689	149	0	0	Final
GO:0007399	nervous system development	1867	222	2.06e-13	2e-09	Final
GO:0032940	secretion by cell	765	113	9.83e-13	7.76e-09	Final
GO:0007611	learning or memory	177	42	1.12e-11	5.24e-08	Final
GO:0060341	regulation of cellular localization	804	113	2.52e-11	1.06e-07	Final
GO:0042391	regulation of membrane potential	297	57	2.8e-11	1.14e-07	Final
GO:0032409	regulation of transporter activity	122	33	4.39e-11	1.74e-07	Final
GO:0034220	ion transmembrane transport	541	84	7.82e-11	3e-07	Final
GO:0007409	axonogenesis	529	81	3.46e-10	1.16e-06	Final
GO:0006836	neurotransmitter transport	138	34	3.52e-10	1.16e-06	Final
GO:0007186	G-protein coupled receptor signaling pathway	649	93	6.01e-10	1.77e-06	Final
GO:0010646	regulation of cell communication	2402	254	9.23e-10	2.56e-06	Final
GO:0051050	positive regulation of transport	564	83	1.48e-09	3.81e-06	Final
GO:0019932	second-messenger-mediated signaling	175	38	1.64e-09	4.06e-06	Final
GO:0023051	regulation of signaling	2395	251	2.88e-09	6.74e-06	Final
GO:0051899	membrane depolarization	94	26	2.99e-09	6.86e-06	Final
GO:0030534	adult behavior	135	31	1.29e-08	2.5e-05	Final
GO:0010517	regulation of phospholipase activity	85	23	3.81e-08	6.49e-05	Final
GO:0007626	locomotory behavior	172	35	4.15e-08	6.81e-05	Final
GO:0006874	cellular calcium ion homeostasis	291	49	5.94e-08	9.04e-05	Final
GO:0010243	response to organonitrogen compound	682	90	6.57e-08	9.73e-05	Final
GO:0007155	cell adhesion	1002	120	1.06e-07	0.000141004	Final
GO:0044057	regulation of system process	351	55	1.15e-07	0.000151598	Final
GO:0006816	calcium ion transport	275	46	1.84e-07	0.000227832	Final
GO:0017157	regulation of exocytosis	87	22	2.76e-07	0.000335707	Final
GO:0043270	positive regulation of ion transport	139	29	3.41e-07	0.000410203	Final
GO:0010975	regulation of neuron projection development	253	42	7.69e-07	0.000789822	Final
GO:0007214	gamma-aminobutyric acid signaling pathway	21	10	8.58e-07	0.00085912	Final
GO:2000021	regulation of ion homeostasis	145	29	8.64e-07	0.00085912	Final
GO:0006813	potassium ion transport	140	28	1.33e-06	0.00128052	Final
GO:0001933	negative regulation of protein phosphorylation	232	39	1.37e-06	0.00130571	Final
GO:0051952	regulation of amine transport	56	16	2.03e-06	0.00184445	Final
GO:0048511	rhythmic process	202	35	2.33e-06	0.00205883	Final
GO:0051051	negative regulation of transport	320	47	5.95e-06	0.00483101	Final
GO:0007169	transmembrane receptor protein tyrosine kinase signaling pathway	669	81	9.32e-06	0.00718432	Final
GO:0010769	regulation of cell morphogenesis involved in differentiation	224	36	9.87e-06	0.00755999	Final
GO:0061061	muscle structure development	464	60	2e-05	0.01459	Final
GO:1900542	regulation of purine nucleotide metabolic process	493	62	3.42e-05	0.0241469	Final
GO:0051259	protein oligomerization	375	50	4.39e-05	0.0296592	Final
GO:0051336	regulation of hydrolase activity	927	101	6.54e-05	0.0417085	Final
GO:0006865	amino acid transport	128	23	6.82e-05	0.0430502	Final
GO:0046058	cAMP metabolic process	129	23	7.72e-05	0.0475925	Final

[truncated: 1 more sheets: COMMON_GENES]
