# Supplementary figures and images for: An Association Rule Mining Approach to Discover lncRNAs Expression Patterns in Cancer Datasets
Source: Hindawi journal article supplement (doi:10.1155/2015/146250), 2015-01-01

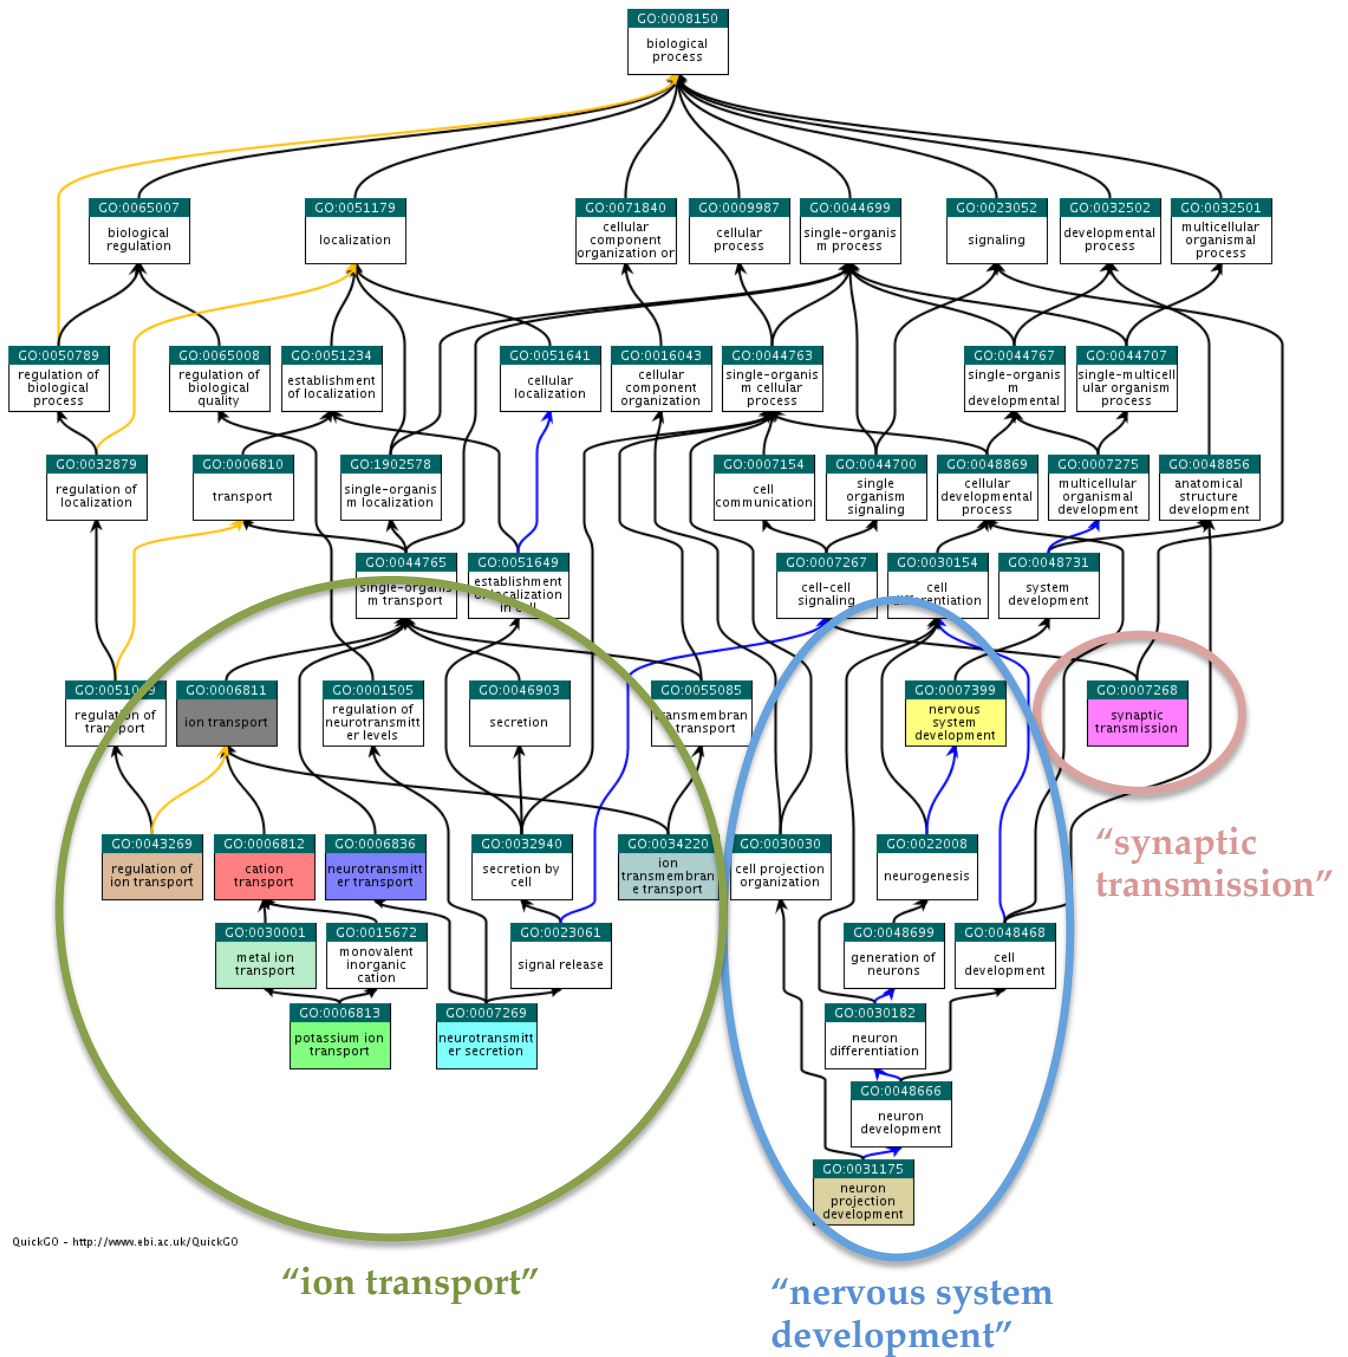

Supplement: f1 [file 146250.f1.zip]
